# Supplementary material for: Proteome Dynamics Across the Blastogenic Cycle of Botryllus schlosseri Reveals Targets for Cell Immortalization
Source: Research Square preprint supplement (doi:10.21203/rs.3.rs-8094443/v1), 2026-01-09
Supplement: Supplementary file 1 [file f71f88554b684e628f0242e7.xlsx]

## Sheet: Sheet1
Primer ID	Forward Sequence (5' to 3')	Reverse Sequence (5' to 3')
FF1	CCAAGGCGCTAGGAAAGACT	CCTCGACTTTCAAAGTATTTGTCT
FF2	TGTGAGTGATCTGGAAAATCTTACA	GTGAAACATTCAAAGAAAGCTTCTT
FF3	GATGGCTGCACCAACTACTACTC	TCTTTGTAGAAACTGATTATTCAATCC
FF4	ATCAATGCTCTTAAGTCCAACAA	CTTTAACAGCAAGTTTGTGAATCAA
FF5	CTCAAACGGTAACAAGACTACATTG	ATAACTGCCAATTTGATGTTGAC
FF7	GCAGTGCTACAGCAAATTGTTC	AGCTGTACTGGTGTGCCTAAAGT
FF9	TTCAAGCACTACATTCACCATAA	CTGTTGCACTGGTACATCTAGGG
FF12	TTGATGCTCAAAGCAAGCAAG	AGTCGCATCCATTATAGCCATC
FF13	TCTGCGAAGTTGGTGATGATTTTA	AAGTGGTACCATGTCATCAGG
FF16	AAGTTTCTCCTTTCATACTATTACCG	TAATTCCAGATGAGACTGTGTGC
FF17	TTGGACACCGACTTCGCATA	CGTAAACGTTCCGAATATTCATGTC
FF22	CACTTTGTGTAAGGTCTCTCAACA	CTGCAAGATGGTCACAGGAGAT
