# Supplementary material for: Proteome Dynamics Across the Blastogenic Cycle of Botryllus schlosseri Reveals Targets for Cell Immortalization
Source: Research Square preprint supplement (doi:10.21203/rs.3.rs-8094443/v1), 2026-01-09
Supplement: Supplementary file 2 [file fcfed3bcf1272863f19a2b27.xlsx]

## Sheet: reanalysis
Permalink:		https://version-12-0.string-db.org/cgi/globalenrichment?networkId=bR3BtYEnv3rk
#category	term ID	term description	genes mapped	genes in set	enrichment score	direction	false discovery rate	method	matching proteins in your input (IDs)	matching proteins in your input (labels)	matching proteins in your input (query labels)	protein input values
GO Process	GO:0006396	RNA processing	179	690	3.88124	bottom	1.3e-33	ks	STRG0A56FBJ.g10084.t1,STRG0A56FBJ.g10263.t1,STRG0A56FBJ.g1043.t1,STRG0A56FBJ.g10715.t1,STRG0A56FBJ.g10725.t1,STRG0A56FBJ.g10730.t1,STRG0A56FBJ.g10880.t1,STRG0A56FBJ.g10943.t1,STRG0A56FBJ.g10958.t1,STRG0A56FBJ.g11408.t1,STRG0A56FBJ.g11449.t1,STRG0A56FBJ.g11450.t1,STRG0A56FBJ.g11504.t1,STRG0A56FBJ.g11764.t1,STRG0A56FBJ.g11768.t1,STRG0A56FBJ.g11776.t1,STRG0A56FBJ.g11879.t1,STRG0A56FBJ.g12100.t1,STRG…	g10084.t1,g10263.t1,g1043.t1,g10715.t1,g10725.t1,g10730.t1,g10880.t1,g10943.t1,g10958.t1,g11408.t1,g11449.t1,g11450.t1,g11504.t1,g11764.t1,g11768.t1,g11776.t1,g11879.t1,g12100.t1,g12187.t1,g12282.t1,g12573.t1,g12722.t1,g12743.t1,g12745.t1,g12779.t1,g12801.t1,g12816.t1,g12904.t1,g12931.t1,g12958.t1,g13035.t1,g13042.t1,g13047.t1,g13050.t1,g13053.t1,g13127.t1,g13158.t1,g13272.t1,g13403.t1,g13410.t1,…	g10084.t1,g10263.t1,g1043.t1,g10715.t1,g10725.t1,g10730.t1,g10880.t1,g10943.t1,g10958.t1,g11408.t1,g11449.t1,g11450.t1,g11504.t1,g11764.t1,g11768.t1,g11776.t1,g11879.t1,g12100.t1,g12187.t1,g12282.t1,g12573.t1,g12722.t1,g12743.t1,g12745.t1,g12779.t1,g12801.t1,g12816.t1,g12904.t1,g12931.t1,g12958.t1,g13035.t1,g13042.t1,g13047.t1,g13050.t1,g13053.t1,g13127.t1,g13158.t1,g13272.t1,g13403.t1,g13410.t1,…	0.688230921,1.270511721,0.725458895,1.058697364,1.219714482,1.64457019,1.330053662,1.621072939,1.61515754,1.090172389,0.775495539,1.250435787,1.105743019,1.237654023,1.684418984,1.470531856,0.886978057,1.287950954,1.274768331,1.11437724,1.499703474,0.677328044,1.582722382,1.98865,1.60224546,0.52463068,1.567087336,1.154561674,0.812894382,1.163260983,1.345176512,2.741363783,0.884097717,0.965357409,…
GO Process	GO:0009059	Macromolecule biosynthetic process	187	1042	3.6922	bottom	2.79e-32	ks	STRG0A56FBJ.g10203.t1,STRG0A56FBJ.g10552.t1,STRG0A56FBJ.g10629.t1,STRG0A56FBJ.g1065.t1,STRG0A56FBJ.g10684.t1,STRG0A56FBJ.g10878.t1,STRG0A56FBJ.g10958.t1,STRG0A56FBJ.g11200.t1,STRG0A56FBJ.g11253.t1,STRG0A56FBJ.g11285.t1,STRG0A56FBJ.g11465.t1,STRG0A56FBJ.g11504.t1,STRG0A56FBJ.g11663.t1,STRG0A56FBJ.g11763.t1,STRG0A56FBJ.g11765.t1,STRG0A56FBJ.g1192.t1,STRG0A56FBJ.g11999.t1,STRG0A56FBJ.g1206.t1,STRG0A…	g10203.t1,g10552.t1,g10629.t1,g1065.t1,g10684.t1,g10878.t1,g10958.t1,g11200.t1,g11253.t1,g11285.t1,g11465.t1,g11504.t1,g11663.t1,g11763.t1,g11765.t1,g1192.t1,g11999.t1,g1206.t1,g12100.t1,g12187.t1,g1219.t1,g1226.t1,g12813.t1,g12914.t1,g13273.t1,g1340.t1,g13409.t1,g13415.t1,g1354.t1,g13540.t1,g13564.t1,g13625.t1,g13718.t1,g13787.t1,g13925.t1,g13929.t1,g13973.t1,g14054.t1,g14143.t1,g14300.t1,g14342…	g10203.t1,g10552.t1,g10629.t1,g1065.t1,g10684.t1,g10878.t1,g10958.t1,g11200.t1,g11253.t1,g11285.t1,g11465.t1,g11504.t1,g11663.t1,g11763.t1,g11765.t1,g1192.t1,g11999.t1,g1206.t1,g12100.t1,g12187.t1,g1219.t1,g1226.t1,g12813.t1,g12914.t1,g13273.t1,g1340.t1,g13409.t1,g13415.t1,g1354.t1,g13540.t1,g13564.t1,g13625.t1,g13718.t1,g13787.t1,g13925.t1,g13929.t1,g13973.t1,g14054.t1,g14143.t1,g14300.t1,g14342…	1.619615035,1.798344637,-1.166703032,1.892385441,-0.889829061,1.209600662,1.61515754,0.787680476,1.891088684,0.772037949,1.599012746,1.105743019,0.984807174,0.951959336,1.127115123,1.087326021,0.877772701,0.896245211,1.287950954,1.274768331,1.563463688,0.906831892,3.136441327,1.186783884,1.407417647,1.719048723,1.673972191,1.223800632,1.150934065,1.224376792,1.623357739,0.786543387,0.949910569,1.…
GO Process	GO:0006412	Translation	153	331	3.86069	bottom	8.91e-31	ks	STRG0A56FBJ.g10203.t1,STRG0A56FBJ.g1065.t1,STRG0A56FBJ.g10684.t1,STRG0A56FBJ.g10878.t1,STRG0A56FBJ.g10958.t1,STRG0A56FBJ.g11200.t1,STRG0A56FBJ.g11253.t1,STRG0A56FBJ.g11285.t1,STRG0A56FBJ.g11465.t1,STRG0A56FBJ.g11504.t1,STRG0A56FBJ.g11663.t1,STRG0A56FBJ.g11763.t1,STRG0A56FBJ.g11765.t1,STRG0A56FBJ.g1192.t1,STRG0A56FBJ.g11999.t1,STRG0A56FBJ.g12100.t1,STRG0A56FBJ.g1219.t1,STRG0A56FBJ.g1226.t1,STRG0A5…	g10203.t1,g1065.t1,g10684.t1,g10878.t1,g10958.t1,g11200.t1,g11253.t1,g11285.t1,g11465.t1,g11504.t1,g11663.t1,g11763.t1,g11765.t1,g1192.t1,g11999.t1,g12100.t1,g1219.t1,g1226.t1,g12914.t1,g13273.t1,g1340.t1,g13409.t1,g13415.t1,g1354.t1,g13540.t1,g13625.t1,g13718.t1,g13787.t1,g13925.t1,g13929.t1,g14054.t1,g14300.t1,g14342.t1,g14358.t1,g1444.t1,g14630.t1,g1472.t1,g15116.t1,g1514.t1,g15160.t1,g15212.t…	g10203.t1,g1065.t1,g10684.t1,g10878.t1,g10958.t1,g11200.t1,g11253.t1,g11285.t1,g11465.t1,g11504.t1,g11663.t1,g11763.t1,g11765.t1,g1192.t1,g11999.t1,g12100.t1,g1219.t1,g1226.t1,g12914.t1,g13273.t1,g1340.t1,g13409.t1,g13415.t1,g1354.t1,g13540.t1,g13625.t1,g13718.t1,g13787.t1,g13925.t1,g13929.t1,g14054.t1,g14300.t1,g14342.t1,g14358.t1,g1444.t1,g14630.t1,g1472.t1,g15116.t1,g1514.t1,g15160.t1,g15212.t…	1.619615035,1.892385441,-0.889829061,1.209600662,1.61515754,0.787680476,1.891088684,0.772037949,1.599012746,1.105743019,0.984807174,0.951959336,1.127115123,1.087326021,0.877772701,1.287950954,1.563463688,0.906831892,1.186783884,1.407417647,1.719048723,1.673972191,1.223800632,1.150934065,1.224376792,0.786543387,0.949910569,1.355900429,1.613424018,1.370464581,1.504070629,1.023585677,1.398157082,1.5…
GO Process	GO:0043043	Peptide biosynthetic process	155	361	3.74938	bottom	1.1e-29	ks	STRG0A56FBJ.g10203.t1,STRG0A56FBJ.g1065.t1,STRG0A56FBJ.g10684.t1,STRG0A56FBJ.g10878.t1,STRG0A56FBJ.g10958.t1,STRG0A56FBJ.g11200.t1,STRG0A56FBJ.g11253.t1,STRG0A56FBJ.g11285.t1,STRG0A56FBJ.g11465.t1,STRG0A56FBJ.g11504.t1,STRG0A56FBJ.g11663.t1,STRG0A56FBJ.g11763.t1,STRG0A56FBJ.g11765.t1,STRG0A56FBJ.g1192.t1,STRG0A56FBJ.g11999.t1,STRG0A56FBJ.g12100.t1,STRG0A56FBJ.g1219.t1,STRG0A56FBJ.g1226.t1,STRG0A5…	g10203.t1,g1065.t1,g10684.t1,g10878.t1,g10958.t1,g11200.t1,g11253.t1,g11285.t1,g11465.t1,g11504.t1,g11663.t1,g11763.t1,g11765.t1,g1192.t1,g11999.t1,g12100.t1,g1219.t1,g1226.t1,g12914.t1,g13273.t1,g1340.t1,g13409.t1,g13415.t1,g1354.t1,g13540.t1,g13625.t1,g13718.t1,g13787.t1,g13925.t1,g13929.t1,g14054.t1,g14300.t1,g14342.t1,g14358.t1,g1444.t1,g14630.t1,g1472.t1,g15116.t1,g1514.t1,g15160.t1,g15212.t…	g10203.t1,g1065.t1,g10684.t1,g10878.t1,g10958.t1,g11200.t1,g11253.t1,g11285.t1,g11465.t1,g11504.t1,g11663.t1,g11763.t1,g11765.t1,g1192.t1,g11999.t1,g12100.t1,g1219.t1,g1226.t1,g12914.t1,g13273.t1,g1340.t1,g13409.t1,g13415.t1,g1354.t1,g13540.t1,g13625.t1,g13718.t1,g13787.t1,g13925.t1,g13929.t1,g14054.t1,g14300.t1,g14342.t1,g14358.t1,g1444.t1,g14630.t1,g1472.t1,g15116.t1,g1514.t1,g15160.t1,g15212.t…	1.619615035,1.892385441,-0.889829061,1.209600662,1.61515754,0.787680476,1.891088684,0.772037949,1.599012746,1.105743019,0.984807174,0.951959336,1.127115123,1.087326021,0.877772701,1.287950954,1.563463688,0.906831892,1.186783884,1.407417647,1.719048723,1.673972191,1.223800632,1.150934065,1.224376792,0.786543387,0.949910569,1.355900429,1.613424018,1.370464581,1.504070629,1.023585677,1.398157082,1.5…
GO Process	GO:0043604	Amide biosynthetic process	159	435	3.61337	bottom	2.96e-28	ks	STRG0A56FBJ.g10203.t1,STRG0A56FBJ.g1065.t1,STRG0A56FBJ.g10684.t1,STRG0A56FBJ.g10878.t1,STRG0A56FBJ.g10958.t1,STRG0A56FBJ.g11200.t1,STRG0A56FBJ.g11253.t1,STRG0A56FBJ.g11285.t1,STRG0A56FBJ.g11465.t1,STRG0A56FBJ.g11504.t1,STRG0A56FBJ.g11663.t1,STRG0A56FBJ.g11763.t1,STRG0A56FBJ.g11765.t1,STRG0A56FBJ.g1192.t1,STRG0A56FBJ.g11999.t1,STRG0A56FBJ.g12100.t1,STRG0A56FBJ.g1219.t1,STRG0A56FBJ.g1226.t1,STRG0A5…	g10203.t1,g1065.t1,g10684.t1,g10878.t1,g10958.t1,g11200.t1,g11253.t1,g11285.t1,g11465.t1,g11504.t1,g11663.t1,g11763.t1,g11765.t1,g1192.t1,g11999.t1,g12100.t1,g1219.t1,g1226.t1,g12914.t1,g13273.t1,g1340.t1,g13409.t1,g13415.t1,g1354.t1,g13540.t1,g13625.t1,g13718.t1,g13787.t1,g13925.t1,g13929.t1,g14054.t1,g14300.t1,g14342.t1,g14358.t1,g1444.t1,g14630.t1,g1472.t1,g15116.t1,g1514.t1,g15160.t1,g15212.t…	g10203.t1,g1065.t1,g10684.t1,g10878.t1,g10958.t1,g11200.t1,g11253.t1,g11285.t1,g11465.t1,g11504.t1,g11663.t1,g11763.t1,g11765.t1,g1192.t1,g11999.t1,g12100.t1,g1219.t1,g1226.t1,g12914.t1,g13273.t1,g1340.t1,g13409.t1,g13415.t1,g1354.t1,g13540.t1,g13625.t1,g13718.t1,g13787.t1,g13925.t1,g13929.t1,g14054.t1,g14300.t1,g14342.t1,g14358.t1,g1444.t1,g14630.t1,g1472.t1,g15116.t1,g1514.t1,g15160.t1,g15212.t…	1.619615035,1.892385441,-0.889829061,1.209600662,1.61515754,0.787680476,1.891088684,0.772037949,1.599012746,1.105743019,0.984807174,0.951959336,1.127115123,1.087326021,0.877772701,1.287950954,1.563463688,0.906831892,1.186783884,1.407417647,1.719048723,1.673972191,1.223800632,1.150934065,1.224376792,0.786543387,0.949910569,1.355900429,1.613424018,1.370464581,1.504070629,1.023585677,1.398157082,1.5…
GO Process	GO:0022613	Ribonucleoprotein complex biogenesis	123	366	4.31396	bottom	1.51e-27	ks	STRG0A56FBJ.g1043.t1,STRG0A56FBJ.g1065.t1,STRG0A56FBJ.g10725.t1,STRG0A56FBJ.g10730.t1,STRG0A56FBJ.g10880.t1,STRG0A56FBJ.g10943.t1,STRG0A56FBJ.g10958.t1,STRG0A56FBJ.g11198.t1,STRG0A56FBJ.g11408.t1,STRG0A56FBJ.g11504.t1,STRG0A56FBJ.g11663.t1,STRG0A56FBJ.g11765.t1,STRG0A56FBJ.g12100.t1,STRG0A56FBJ.g12575.t1,STRG0A56FBJ.g12745.t1,STRG0A56FBJ.g12816.t1,STRG0A56FBJ.g12958.t1,STRG0A56FBJ.g12972.t1,STRG0…	g1043.t1,g1065.t1,g10725.t1,g10730.t1,g10880.t1,g10943.t1,g10958.t1,g11198.t1,g11408.t1,g11504.t1,g11663.t1,g11765.t1,g12100.t1,g12575.t1,g12745.t1,g12816.t1,g12958.t1,g12972.t1,g13042.t1,g13127.t1,g13157.t1,g13245.t1,g13272.t1,g1340.t1,g13403.t1,g13410.t1,g13787.t1,g13806.t1,g14053.t1,g14054.t1,g14125.t1,g14268.t1,g14342.t1,g14496.t1,g14652.t1,g14697.t1,g1472.t1,g14886.t1,g15003.t1,g15032.t1,g15…	g1043.t1,g1065.t1,g10725.t1,g10730.t1,g10880.t1,g10943.t1,g10958.t1,g11198.t1,g11408.t1,g11504.t1,g11663.t1,g11765.t1,g12100.t1,g12575.t1,g12745.t1,g12816.t1,g12958.t1,g12972.t1,g13042.t1,g13127.t1,g13157.t1,g13245.t1,g13272.t1,g1340.t1,g13403.t1,g13410.t1,g13787.t1,g13806.t1,g14053.t1,g14054.t1,g14125.t1,g14268.t1,g14342.t1,g14496.t1,g14652.t1,g14697.t1,g1472.t1,g14886.t1,g15003.t1,g15032.t1,g15…	0.725458895,1.892385441,1.219714482,1.64457019,1.330053662,1.621072939,1.61515754,0.956248288,1.090172389,1.105743019,0.984807174,1.127115123,1.287950954,2.645434198,1.98865,1.567087336,1.163260983,0.728851337,2.741363783,1.027408517,1.441324248,1.447232149,1.420638048,1.719048723,2.214116895,1.673276068,1.355900429,0.741590607,1.403403191,1.504070629,3.057315031,1.171657699,1.398157082,1.1250211…
GO Process	GO:0034645	Cellular macromolecule biosynthetic process	162	759	3.62483	bottom	1.68e-27	ks	STRG0A56FBJ.g10203.t1,STRG0A56FBJ.g10629.t1,STRG0A56FBJ.g1065.t1,STRG0A56FBJ.g10684.t1,STRG0A56FBJ.g10878.t1,STRG0A56FBJ.g10958.t1,STRG0A56FBJ.g11200.t1,STRG0A56FBJ.g11253.t1,STRG0A56FBJ.g11285.t1,STRG0A56FBJ.g11465.t1,STRG0A56FBJ.g11504.t1,STRG0A56FBJ.g11663.t1,STRG0A56FBJ.g11763.t1,STRG0A56FBJ.g11765.t1,STRG0A56FBJ.g1192.t1,STRG0A56FBJ.g11999.t1,STRG0A56FBJ.g12100.t1,STRG0A56FBJ.g1219.t1,STRG0A…	g10203.t1,g10629.t1,g1065.t1,g10684.t1,g10878.t1,g10958.t1,g11200.t1,g11253.t1,g11285.t1,g11465.t1,g11504.t1,g11663.t1,g11763.t1,g11765.t1,g1192.t1,g11999.t1,g12100.t1,g1219.t1,g1226.t1,g12914.t1,g13273.t1,g1340.t1,g13409.t1,g13415.t1,g1354.t1,g13540.t1,g13625.t1,g13718.t1,g13787.t1,g13925.t1,g13929.t1,g14054.t1,g14300.t1,g14342.t1,g14358.t1,g14365.t1,g1444.t1,g14630.t1,g1472.t1,g15116.t1,g1514.t…	g10203.t1,g10629.t1,g1065.t1,g10684.t1,g10878.t1,g10958.t1,g11200.t1,g11253.t1,g11285.t1,g11465.t1,g11504.t1,g11663.t1,g11763.t1,g11765.t1,g1192.t1,g11999.t1,g12100.t1,g1219.t1,g1226.t1,g12914.t1,g13273.t1,g1340.t1,g13409.t1,g13415.t1,g1354.t1,g13540.t1,g13625.t1,g13718.t1,g13787.t1,g13925.t1,g13929.t1,g14054.t1,g14300.t1,g14342.t1,g14358.t1,g14365.t1,g1444.t1,g14630.t1,g1472.t1,g15116.t1,g1514.t…	1.619615035,-1.166703032,1.892385441,-0.889829061,1.209600662,1.61515754,0.787680476,1.891088684,0.772037949,1.599012746,1.105743019,0.984807174,0.951959336,1.127115123,1.087326021,0.877772701,1.287950954,1.563463688,0.906831892,1.186783884,1.407417647,1.719048723,1.673972191,1.223800632,1.150934065,1.224376792,0.786543387,0.949910569,1.355900429,1.613424018,1.370464581,1.504070629,1.023585677,1.…
GO Process	GO:0016071	mRNA metabolic process	131	448	3.46818	bottom	2.09e-22	ks	STRG0A56FBJ.g10084.t1,STRG0A56FBJ.g10263.t1,STRG0A56FBJ.g1043.t1,STRG0A56FBJ.g10715.t1,STRG0A56FBJ.g11408.t1,STRG0A56FBJ.g11449.t1,STRG0A56FBJ.g11450.t1,STRG0A56FBJ.g11764.t1,STRG0A56FBJ.g11768.t1,STRG0A56FBJ.g11776.t1,STRG0A56FBJ.g11879.t1,STRG0A56FBJ.g12187.t1,STRG0A56FBJ.g12573.t1,STRG0A56FBJ.g12743.t1,STRG0A56FBJ.g12745.t1,STRG0A56FBJ.g12779.t1,STRG0A56FBJ.g12801.t1,STRG0A56FBJ.g12931.t1,STRG…	g10084.t1,g10263.t1,g1043.t1,g10715.t1,g11408.t1,g11449.t1,g11450.t1,g11764.t1,g11768.t1,g11776.t1,g11879.t1,g12187.t1,g12573.t1,g12743.t1,g12745.t1,g12779.t1,g12801.t1,g12931.t1,g12958.t1,g13035.t1,g13050.t1,g13053.t1,g13158.t1,g13422.t1,g13509.t1,g13553.t1,g13649.t1,g13806.t1,g13929.t1,g14118.t1,g14123.t1,g14125.t1,g14268.t1,g14471.t1,g14886.t1,g14888.t1,g15003.t1,g15033.t1,g15090.t1,g15223.t1,…	g10084.t1,g10263.t1,g1043.t1,g10715.t1,g11408.t1,g11449.t1,g11450.t1,g11764.t1,g11768.t1,g11776.t1,g11879.t1,g12187.t1,g12573.t1,g12743.t1,g12745.t1,g12779.t1,g12801.t1,g12931.t1,g12958.t1,g13035.t1,g13050.t1,g13053.t1,g13158.t1,g13422.t1,g13509.t1,g13553.t1,g13649.t1,g13806.t1,g13929.t1,g14118.t1,g14123.t1,g14125.t1,g14268.t1,g14471.t1,g14886.t1,g14888.t1,g15003.t1,g15033.t1,g15090.t1,g15223.t1,…	0.688230921,1.270511721,0.725458895,1.058697364,1.090172389,0.775495539,1.250435787,1.237654023,1.684418984,1.470531856,0.886978057,1.274768331,1.499703474,1.582722382,1.98865,1.60224546,0.52463068,0.812894382,1.163260983,1.345176512,0.965357409,0.93934618,1.057367674,1.180597013,1.039709714,1.201525018,0.965199726,0.741590607,1.370464581,1.072258989,1.488579723,3.057315031,1.171657699,1.15084285…
GO Process	GO:0006397	mRNA processing	112	352	3.46583	bottom	2.35e-20	ks	STRG0A56FBJ.g10084.t1,STRG0A56FBJ.g10263.t1,STRG0A56FBJ.g1043.t1,STRG0A56FBJ.g10715.t1,STRG0A56FBJ.g11408.t1,STRG0A56FBJ.g11449.t1,STRG0A56FBJ.g11450.t1,STRG0A56FBJ.g11764.t1,STRG0A56FBJ.g11768.t1,STRG0A56FBJ.g11776.t1,STRG0A56FBJ.g11879.t1,STRG0A56FBJ.g12187.t1,STRG0A56FBJ.g12743.t1,STRG0A56FBJ.g12745.t1,STRG0A56FBJ.g12779.t1,STRG0A56FBJ.g12801.t1,STRG0A56FBJ.g12931.t1,STRG0A56FBJ.g12958.t1,STRG…	g10084.t1,g10263.t1,g1043.t1,g10715.t1,g11408.t1,g11449.t1,g11450.t1,g11764.t1,g11768.t1,g11776.t1,g11879.t1,g12187.t1,g12743.t1,g12745.t1,g12779.t1,g12801.t1,g12931.t1,g12958.t1,g13035.t1,g13050.t1,g13053.t1,g13158.t1,g13422.t1,g13509.t1,g13553.t1,g13649.t1,g13806.t1,g14118.t1,g14123.t1,g14268.t1,g14886.t1,g15003.t1,g15090.t1,g15223.t1,g15227.t1,g15228.t1,g15361.t1,g15397.t1,g15400.t1,g15532.t1,…	g10084.t1,g10263.t1,g1043.t1,g10715.t1,g11408.t1,g11449.t1,g11450.t1,g11764.t1,g11768.t1,g11776.t1,g11879.t1,g12187.t1,g12743.t1,g12745.t1,g12779.t1,g12801.t1,g12931.t1,g12958.t1,g13035.t1,g13050.t1,g13053.t1,g13158.t1,g13422.t1,g13509.t1,g13553.t1,g13649.t1,g13806.t1,g14118.t1,g14123.t1,g14268.t1,g14886.t1,g15003.t1,g15090.t1,g15223.t1,g15227.t1,g15228.t1,g15361.t1,g15397.t1,g15400.t1,g15532.t1,…	0.688230921,1.270511721,0.725458895,1.058697364,1.090172389,0.775495539,1.250435787,1.237654023,1.684418984,1.470531856,0.886978057,1.274768331,1.582722382,1.98865,1.60224546,0.52463068,0.812894382,1.163260983,1.345176512,0.965357409,0.93934618,1.057367674,1.180597013,1.039709714,1.201525018,0.965199726,0.741590607,1.072258989,1.488579723,1.171657699,0.737221712,1.747120531,-0.719726623,1.3601855…
GO Process	GO:0042254	Ribosome biogenesis	77	265	4.67249	bottom	2.44e-20	ks	STRG0A56FBJ.g10725.t1,STRG0A56FBJ.g10730.t1,STRG0A56FBJ.g10880.t1,STRG0A56FBJ.g10943.t1,STRG0A56FBJ.g10958.t1,STRG0A56FBJ.g11198.t1,STRG0A56FBJ.g11504.t1,STRG0A56FBJ.g11663.t1,STRG0A56FBJ.g12100.t1,STRG0A56FBJ.g12575.t1,STRG0A56FBJ.g12816.t1,STRG0A56FBJ.g12972.t1,STRG0A56FBJ.g13042.t1,STRG0A56FBJ.g13127.t1,STRG0A56FBJ.g13157.t1,STRG0A56FBJ.g13245.t1,STRG0A56FBJ.g13272.t1,STRG0A56FBJ.g1340.t1,STRG…	g10725.t1,g10730.t1,g10880.t1,g10943.t1,g10958.t1,g11198.t1,g11504.t1,g11663.t1,g12100.t1,g12575.t1,g12816.t1,g12972.t1,g13042.t1,g13127.t1,g13157.t1,g13245.t1,g13272.t1,g1340.t1,g13403.t1,g13410.t1,g13787.t1,g14053.t1,g14054.t1,g14125.t1,g14268.t1,g14496.t1,g14652.t1,g14697.t1,g15003.t1,g15032.t1,g15134.t1,g15532.t1,g15874.t1,g1593.t1,g16042.t1,g16316.t1,g16382.t1,g16731.t1,g17001.t1,g1838.t1,g2…	g10725.t1,g10730.t1,g10880.t1,g10943.t1,g10958.t1,g11198.t1,g11504.t1,g11663.t1,g12100.t1,g12575.t1,g12816.t1,g12972.t1,g13042.t1,g13127.t1,g13157.t1,g13245.t1,g13272.t1,g1340.t1,g13403.t1,g13410.t1,g13787.t1,g14053.t1,g14054.t1,g14125.t1,g14268.t1,g14496.t1,g14652.t1,g14697.t1,g15003.t1,g15032.t1,g15134.t1,g15532.t1,g15874.t1,g1593.t1,g16042.t1,g16316.t1,g16382.t1,g16731.t1,g17001.t1,g1838.t1,g2…	1.219714482,1.64457019,1.330053662,1.621072939,1.61515754,0.956248288,1.105743019,0.984807174,1.287950954,2.645434198,1.567087336,0.728851337,2.741363783,1.027408517,1.441324248,1.447232149,1.420638048,1.719048723,2.214116895,1.673276068,1.355900429,1.403403191,1.504070629,3.057315031,1.171657699,1.125021174,1.640171576,1.401597345,1.747120531,1.524786913,1.534775144,1.245278035,0.956981837,1.377…
GO Process	GO:0010608	Post-transcriptional regulation of gene expression	93	311	3.73883	bottom	1.97e-18	ks	STRG0A56FBJ.g1065.t1,STRG0A56FBJ.g10878.t1,STRG0A56FBJ.g11151.t1,STRG0A56FBJ.g11285.t1,STRG0A56FBJ.g1165.t1,STRG0A56FBJ.g11763.t1,STRG0A56FBJ.g11765.t1,STRG0A56FBJ.g11926.t1,STRG0A56FBJ.g11953.t1,STRG0A56FBJ.g12282.t1,STRG0A56FBJ.g12573.t1,STRG0A56FBJ.g12868.t1,STRG0A56FBJ.g12904.t1,STRG0A56FBJ.g12914.t1,STRG0A56FBJ.g13260.t1,STRG0A56FBJ.g13415.t1,STRG0A56FBJ.g13929.t1,STRG0A56FBJ.g14118.t1,STRG0…	g1065.t1,g10878.t1,g11151.t1,g11285.t1,g1165.t1,g11763.t1,g11765.t1,g11926.t1,g11953.t1,g12282.t1,g12573.t1,g12868.t1,g12904.t1,g12914.t1,g13260.t1,g13415.t1,g13929.t1,g14118.t1,g14268.t1,g14298.t1,g14300.t1,g14342.t1,g1441.t1,g1472.t1,g15033.t1,g15227.t1,g15397.t1,g15448.t1,g16236.t1,g16382.t1,g16407.t1,g16501.t1,g16622.t1,g16664.t1,g16709.t1,g16786.t1,g16882.t1,g16921.t1,g16953.t1,g2023.t1,g231…	g1065.t1,g10878.t1,g11151.t1,g11285.t1,g1165.t1,g11763.t1,g11765.t1,g11926.t1,g11953.t1,g12282.t1,g12573.t1,g12868.t1,g12904.t1,g12914.t1,g13260.t1,g13415.t1,g13929.t1,g14118.t1,g14268.t1,g14298.t1,g14300.t1,g14342.t1,g1441.t1,g1472.t1,g15033.t1,g15227.t1,g15397.t1,g15448.t1,g16236.t1,g16382.t1,g16407.t1,g16501.t1,g16622.t1,g16664.t1,g16709.t1,g16786.t1,g16882.t1,g16921.t1,g16953.t1,g2023.t1,g231…	1.892385441,1.209600662,0.667149877,0.772037949,1.607019364,0.951959336,1.127115123,1.048116873,1.345128774,1.11437724,1.499703474,0.970214216,1.154561674,1.186783884,1.535837816,1.223800632,1.370464581,1.072258989,1.171657699,-0.947624734,1.023585677,1.398157082,1.377012035,1.267105688,1.162423469,1.825505464,0.857327905,1.097593899,1.34917892,1.959919797,1.823552318,1.03137856,1.099890853,-2.18…
GO Process	GO:0051252	Regulation of RNA metabolic process	192	1576	2.67096	bottom	6.85e-18	ks	STRG0A56FBJ.g10308.t1,STRG0A56FBJ.g10334.t1,STRG0A56FBJ.g10725.t1,STRG0A56FBJ.g10824.t1,STRG0A56FBJ.g109.t1,STRG0A56FBJ.g10948.t1,STRG0A56FBJ.g11151.t1,STRG0A56FBJ.g11217.t1,STRG0A56FBJ.g11285.t1,STRG0A56FBJ.g11369.t1,STRG0A56FBJ.g11431.t1,STRG0A56FBJ.g11450.t1,STRG0A56FBJ.g11626.t1,STRG0A56FBJ.g11776.t1,STRG0A56FBJ.g11879.t1,STRG0A56FBJ.g11953.t1,STRG0A56FBJ.g1206.t1,STRG0A56FBJ.g12187.t1,STRG0A…	g10308.t1,g10334.t1,g10725.t1,g10824.t1,g109.t1,g10948.t1,g11151.t1,g11217.t1,g11285.t1,g11369.t1,g11431.t1,g11450.t1,g11626.t1,g11776.t1,g11879.t1,g11953.t1,g1206.t1,g12187.t1,g12513.t1,g12575.t1,g12745.t1,g12779.t1,g12837.t1,g12931.t1,g12958.t1,g13035.t1,g13053.t1,g13247.t1,g13250.t1,g13267.t1,g13390.t1,g13705.t1,g13972.t1,g14118.t1,g14123.t1,g14143.t1,g14160.t1,g14268.t1,g14346.t1,g1441.t1,g14…	g10308.t1,g10334.t1,g10725.t1,g10824.t1,g109.t1,g10948.t1,g11151.t1,g11217.t1,g11285.t1,g11369.t1,g11431.t1,g11450.t1,g11626.t1,g11776.t1,g11879.t1,g11953.t1,g1206.t1,g12187.t1,g12513.t1,g12575.t1,g12745.t1,g12779.t1,g12837.t1,g12931.t1,g12958.t1,g13035.t1,g13053.t1,g13247.t1,g13250.t1,g13267.t1,g13390.t1,g13705.t1,g13972.t1,g14118.t1,g14123.t1,g14143.t1,g14160.t1,g14268.t1,g14346.t1,g1441.t1,g14…	1.978994003,0.980851571,1.219714482,3.076915162,0.979392542,1.830854422,0.667149877,-0.434951345,0.772037949,1.07180322,1.33275789,1.250435787,1.323694824,1.470531856,0.886978057,1.345128774,0.896245211,1.274768331,0.728606639,2.645434198,1.98865,1.60224546,1.198708879,0.812894382,1.163260983,1.345176512,0.93934618,-0.962807666,1.420357293,0.866781681,-0.56891928,0.797574806,0.907950028,1.0722589…
GO Process	GO:0008380	RNA splicing	102	268	3.43485	bottom	8.56e-18	ks	STRG0A56FBJ.g10263.t1,STRG0A56FBJ.g1043.t1,STRG0A56FBJ.g10715.t1,STRG0A56FBJ.g11408.t1,STRG0A56FBJ.g11450.t1,STRG0A56FBJ.g11764.t1,STRG0A56FBJ.g11768.t1,STRG0A56FBJ.g11776.t1,STRG0A56FBJ.g11879.t1,STRG0A56FBJ.g12722.t1,STRG0A56FBJ.g12743.t1,STRG0A56FBJ.g12745.t1,STRG0A56FBJ.g12779.t1,STRG0A56FBJ.g12801.t1,STRG0A56FBJ.g12931.t1,STRG0A56FBJ.g12958.t1,STRG0A56FBJ.g13035.t1,STRG0A56FBJ.g13047.t1,STRG…	g10263.t1,g1043.t1,g10715.t1,g11408.t1,g11450.t1,g11764.t1,g11768.t1,g11776.t1,g11879.t1,g12722.t1,g12743.t1,g12745.t1,g12779.t1,g12801.t1,g12931.t1,g12958.t1,g13035.t1,g13047.t1,g13050.t1,g13158.t1,g13509.t1,g13553.t1,g13649.t1,g13806.t1,g14118.t1,g14123.t1,g14268.t1,g14886.t1,g14992.t1,g15003.t1,g15090.t1,g15223.t1,g15227.t1,g15228.t1,g15361.t1,g15400.t1,g15532.t1,g15553.t1,g15609.t1,g15659.t1,…	g10263.t1,g1043.t1,g10715.t1,g11408.t1,g11450.t1,g11764.t1,g11768.t1,g11776.t1,g11879.t1,g12722.t1,g12743.t1,g12745.t1,g12779.t1,g12801.t1,g12931.t1,g12958.t1,g13035.t1,g13047.t1,g13050.t1,g13158.t1,g13509.t1,g13553.t1,g13649.t1,g13806.t1,g14118.t1,g14123.t1,g14268.t1,g14886.t1,g14992.t1,g15003.t1,g15090.t1,g15223.t1,g15227.t1,g15228.t1,g15361.t1,g15400.t1,g15532.t1,g15553.t1,g15609.t1,g15659.t1,…	1.270511721,0.725458895,1.058697364,1.090172389,1.250435787,1.237654023,1.684418984,1.470531856,0.886978057,0.677328044,1.582722382,1.98865,1.60224546,0.52463068,0.812894382,1.163260983,1.345176512,0.884097717,0.965357409,1.057367674,1.039709714,1.201525018,0.965199726,0.741590607,1.072258989,1.488579723,1.171657699,0.737221712,0.980139671,1.747120531,-0.719726623,1.36018555,1.825505464,1.1327245…
GO Process	GO:0006518	Peptide metabolic process	184	498	2.6327	bottom	1.43e-17	ks	STRG0A56FBJ.g10203.t1,STRG0A56FBJ.g1065.t1,STRG0A56FBJ.g10684.t1,STRG0A56FBJ.g10878.t1,STRG0A56FBJ.g10958.t1,STRG0A56FBJ.g10999.t1,STRG0A56FBJ.g11200.t1,STRG0A56FBJ.g11239.t1,STRG0A56FBJ.g11240.t1,STRG0A56FBJ.g11253.t1,STRG0A56FBJ.g11285.t1,STRG0A56FBJ.g11465.t1,STRG0A56FBJ.g11504.t1,STRG0A56FBJ.g11608.t1,STRG0A56FBJ.g11609.t1,STRG0A56FBJ.g11663.t1,STRG0A56FBJ.g11763.t1,STRG0A56FBJ.g11765.t1,STRG…	g10203.t1,g1065.t1,g10684.t1,g10878.t1,g10958.t1,g10999.t1,g11200.t1,g11239.t1,g11240.t1,g11253.t1,g11285.t1,g11465.t1,g11504.t1,g11608.t1,g11609.t1,g11663.t1,g11763.t1,g11765.t1,g1192.t1,g11999.t1,g12100.t1,g1219.t1,g1226.t1,g12338.t1,g12344.t1,g12345.t1,g12914.t1,g13273.t1,g1340.t1,g13409.t1,g13415.t1,g13467.t1,g1354.t1,g13540.t1,g13625.t1,g13644.t1,g13718.t1,g13787.t1,g13925.t1,g13929.t1,g1405…	g10203.t1,g1065.t1,g10684.t1,g10878.t1,g10958.t1,g10999.t1,g11200.t1,g11239.t1,g11240.t1,g11253.t1,g11285.t1,g11465.t1,g11504.t1,g11608.t1,g11609.t1,g11663.t1,g11763.t1,g11765.t1,g1192.t1,g11999.t1,g12100.t1,g1219.t1,g1226.t1,g12338.t1,g12344.t1,g12345.t1,g12914.t1,g13273.t1,g1340.t1,g13409.t1,g13415.t1,g13467.t1,g1354.t1,g13540.t1,g13625.t1,g13644.t1,g13718.t1,g13787.t1,g13925.t1,g13929.t1,g1405…	1.619615035,1.892385441,-0.889829061,1.209600662,1.61515754,-0.876018626,0.787680476,-1.040095042,-1.73921872,1.891088684,0.772037949,1.599012746,1.105743019,-2.458708054,-1.560342674,0.984807174,0.951959336,1.127115123,1.087326021,0.877772701,1.287950954,1.563463688,0.906831892,-1.893806679,-2.252173554,-1.298621144,1.186783884,1.407417647,1.719048723,1.673972191,1.223800632,0.616742099,1.150934…
GO Process	GO:0034660	ncRNA metabolic process	84	434	4.19153	bottom	2.2e-17	ks	STRG0A56FBJ.g10725.t1,STRG0A56FBJ.g10730.t1,STRG0A56FBJ.g10880.t1,STRG0A56FBJ.g10943.t1,STRG0A56FBJ.g10958.t1,STRG0A56FBJ.g11200.t1,STRG0A56FBJ.g11504.t1,STRG0A56FBJ.g11926.t1,STRG0A56FBJ.g11999.t1,STRG0A56FBJ.g12100.t1,STRG0A56FBJ.g1226.t1,STRG0A56FBJ.g12722.t1,STRG0A56FBJ.g12816.t1,STRG0A56FBJ.g12904.t1,STRG0A56FBJ.g13042.t1,STRG0A56FBJ.g13127.t1,STRG0A56FBJ.g13148.t1,STRG0A56FBJ.g13272.t1,STRG…	g10725.t1,g10730.t1,g10880.t1,g10943.t1,g10958.t1,g11200.t1,g11504.t1,g11926.t1,g11999.t1,g12100.t1,g1226.t1,g12722.t1,g12816.t1,g12904.t1,g13042.t1,g13127.t1,g13148.t1,g13272.t1,g13403.t1,g13410.t1,g13718.t1,g14054.t1,g14125.t1,g14243.t1,g14652.t1,g14888.t1,g14992.t1,g15003.t1,g15032.t1,g15134.t1,g15228.t1,g15309.t1,g15326.t1,g15397.t1,g15532.t1,g15871.t1,g15874.t1,g1593.t1,g16382.t1,g16731.t1,g…	g10725.t1,g10730.t1,g10880.t1,g10943.t1,g10958.t1,g11200.t1,g11504.t1,g11926.t1,g11999.t1,g12100.t1,g1226.t1,g12722.t1,g12816.t1,g12904.t1,g13042.t1,g13127.t1,g13148.t1,g13272.t1,g13403.t1,g13410.t1,g13718.t1,g14054.t1,g14125.t1,g14243.t1,g14652.t1,g14888.t1,g14992.t1,g15003.t1,g15032.t1,g15134.t1,g15228.t1,g15309.t1,g15326.t1,g15397.t1,g15532.t1,g15871.t1,g15874.t1,g1593.t1,g16382.t1,g16731.t1,g…	1.219714482,1.64457019,1.330053662,1.621072939,1.61515754,0.787680476,1.105743019,1.048116873,0.877772701,1.287950954,0.906831892,0.677328044,1.567087336,1.154561674,2.741363783,1.027408517,0.812650421,1.420638048,2.214116895,1.673276068,0.949910569,1.504070629,3.057315031,1.524443724,1.640171576,1.60276862,0.980139671,1.747120531,1.524786913,1.534775144,1.132724558,0.83213681,0.839474537,0.85732…
GO Process	GO:0006417	Regulation of translation	83	256	3.74753	bottom	4.29e-17	ks	STRG0A56FBJ.g1065.t1,STRG0A56FBJ.g10878.t1,STRG0A56FBJ.g11151.t1,STRG0A56FBJ.g11285.t1,STRG0A56FBJ.g1165.t1,STRG0A56FBJ.g11763.t1,STRG0A56FBJ.g11765.t1,STRG0A56FBJ.g11926.t1,STRG0A56FBJ.g11953.t1,STRG0A56FBJ.g12282.t1,STRG0A56FBJ.g12868.t1,STRG0A56FBJ.g12914.t1,STRG0A56FBJ.g13260.t1,STRG0A56FBJ.g13415.t1,STRG0A56FBJ.g13929.t1,STRG0A56FBJ.g14118.t1,STRG0A56FBJ.g14268.t1,STRG0A56FBJ.g14298.t1,STRG0…	g1065.t1,g10878.t1,g11151.t1,g11285.t1,g1165.t1,g11763.t1,g11765.t1,g11926.t1,g11953.t1,g12282.t1,g12868.t1,g12914.t1,g13260.t1,g13415.t1,g13929.t1,g14118.t1,g14268.t1,g14298.t1,g14300.t1,g14342.t1,g1441.t1,g1472.t1,g15033.t1,g15397.t1,g15448.t1,g16236.t1,g16382.t1,g16407.t1,g16501.t1,g16622.t1,g16664.t1,g16709.t1,g16786.t1,g16882.t1,g16921.t1,g16953.t1,g2023.t1,g2311.t1,g2430.t1,g2542.t1,g2667.t…	g1065.t1,g10878.t1,g11151.t1,g11285.t1,g1165.t1,g11763.t1,g11765.t1,g11926.t1,g11953.t1,g12282.t1,g12868.t1,g12914.t1,g13260.t1,g13415.t1,g13929.t1,g14118.t1,g14268.t1,g14298.t1,g14300.t1,g14342.t1,g1441.t1,g1472.t1,g15033.t1,g15397.t1,g15448.t1,g16236.t1,g16382.t1,g16407.t1,g16501.t1,g16622.t1,g16664.t1,g16709.t1,g16786.t1,g16882.t1,g16921.t1,g16953.t1,g2023.t1,g2311.t1,g2430.t1,g2542.t1,g2667.t…	1.892385441,1.209600662,0.667149877,0.772037949,1.607019364,0.951959336,1.127115123,1.048116873,1.345128774,1.11437724,0.970214216,1.186783884,1.535837816,1.223800632,1.370464581,1.072258989,1.171657699,-0.947624734,1.023585677,1.398157082,1.377012035,1.267105688,1.162423469,0.857327905,1.097593899,1.34917892,1.959919797,1.823552318,1.03137856,1.099890853,-2.180683348,0.80445511,1.140496005,0.899…
GO Process	GO:0034470	ncRNA processing	67	336	4.62477	bottom	4.48e-17	ks	STRG0A56FBJ.g10725.t1,STRG0A56FBJ.g10730.t1,STRG0A56FBJ.g10880.t1,STRG0A56FBJ.g10943.t1,STRG0A56FBJ.g10958.t1,STRG0A56FBJ.g11504.t1,STRG0A56FBJ.g12100.t1,STRG0A56FBJ.g12722.t1,STRG0A56FBJ.g12816.t1,STRG0A56FBJ.g12904.t1,STRG0A56FBJ.g13042.t1,STRG0A56FBJ.g13127.t1,STRG0A56FBJ.g13272.t1,STRG0A56FBJ.g13403.t1,STRG0A56FBJ.g13410.t1,STRG0A56FBJ.g13718.t1,STRG0A56FBJ.g14054.t1,STRG0A56FBJ.g14125.t1,STR…	g10725.t1,g10730.t1,g10880.t1,g10943.t1,g10958.t1,g11504.t1,g12100.t1,g12722.t1,g12816.t1,g12904.t1,g13042.t1,g13127.t1,g13272.t1,g13403.t1,g13410.t1,g13718.t1,g14054.t1,g14125.t1,g14243.t1,g14652.t1,g14888.t1,g14992.t1,g15003.t1,g15032.t1,g15134.t1,g15228.t1,g15309.t1,g15397.t1,g15532.t1,g15874.t1,g1593.t1,g16382.t1,g16731.t1,g2232.t1,g2311.t1,g2471.t1,g2667.t1,g2692.t1,g2780.t1,g2843.t1,g3054.t…	g10725.t1,g10730.t1,g10880.t1,g10943.t1,g10958.t1,g11504.t1,g12100.t1,g12722.t1,g12816.t1,g12904.t1,g13042.t1,g13127.t1,g13272.t1,g13403.t1,g13410.t1,g13718.t1,g14054.t1,g14125.t1,g14243.t1,g14652.t1,g14888.t1,g14992.t1,g15003.t1,g15032.t1,g15134.t1,g15228.t1,g15309.t1,g15397.t1,g15532.t1,g15874.t1,g1593.t1,g16382.t1,g16731.t1,g2232.t1,g2311.t1,g2471.t1,g2667.t1,g2692.t1,g2780.t1,g2843.t1,g3054.t…	1.219714482,1.64457019,1.330053662,1.621072939,1.61515754,1.105743019,1.287950954,0.677328044,1.567087336,1.154561674,2.741363783,1.027408517,1.420638048,2.214116895,1.673276068,0.949910569,1.504070629,3.057315031,1.524443724,1.640171576,1.60276862,0.980139671,1.747120531,1.524786913,1.534775144,1.132724558,0.83213681,0.857327905,1.245278035,0.956981837,1.377134445,1.959919797,1.729789056,2.46131…
GO Process	GO:0034248	Regulation of cellular amide metabolic process	87	283	3.55202	bottom	1.41e-15	ks	STRG0A56FBJ.g10334.t1,STRG0A56FBJ.g1065.t1,STRG0A56FBJ.g10878.t1,STRG0A56FBJ.g11151.t1,STRG0A56FBJ.g11285.t1,STRG0A56FBJ.g1165.t1,STRG0A56FBJ.g11763.t1,STRG0A56FBJ.g11765.t1,STRG0A56FBJ.g11926.t1,STRG0A56FBJ.g11953.t1,STRG0A56FBJ.g12282.t1,STRG0A56FBJ.g12868.t1,STRG0A56FBJ.g12914.t1,STRG0A56FBJ.g13260.t1,STRG0A56FBJ.g13415.t1,STRG0A56FBJ.g13420.t1,STRG0A56FBJ.g13929.t1,STRG0A56FBJ.g14118.t1,STRG0…	g10334.t1,g1065.t1,g10878.t1,g11151.t1,g11285.t1,g1165.t1,g11763.t1,g11765.t1,g11926.t1,g11953.t1,g12282.t1,g12868.t1,g12914.t1,g13260.t1,g13415.t1,g13420.t1,g13929.t1,g14118.t1,g14268.t1,g14298.t1,g14300.t1,g14342.t1,g1441.t1,g1472.t1,g15033.t1,g15397.t1,g15448.t1,g16236.t1,g16382.t1,g16407.t1,g16456.t1,g16501.t1,g16622.t1,g16664.t1,g16709.t1,g16786.t1,g16882.t1,g16921.t1,g16953.t1,g2023.t1,g231…	g10334.t1,g1065.t1,g10878.t1,g11151.t1,g11285.t1,g1165.t1,g11763.t1,g11765.t1,g11926.t1,g11953.t1,g12282.t1,g12868.t1,g12914.t1,g13260.t1,g13415.t1,g13420.t1,g13929.t1,g14118.t1,g14268.t1,g14298.t1,g14300.t1,g14342.t1,g1441.t1,g1472.t1,g15033.t1,g15397.t1,g15448.t1,g16236.t1,g16382.t1,g16407.t1,g16456.t1,g16501.t1,g16622.t1,g16664.t1,g16709.t1,g16786.t1,g16882.t1,g16921.t1,g16953.t1,g2023.t1,g231…	0.980851571,1.892385441,1.209600662,0.667149877,0.772037949,1.607019364,0.951959336,1.127115123,1.048116873,1.345128774,1.11437724,0.970214216,1.186783884,1.535837816,1.223800632,-0.585097553,1.370464581,1.072258989,1.171657699,-0.947624734,1.023585677,1.398157082,1.377012035,1.267105688,1.162423469,0.857327905,1.097593899,1.34917892,1.959919797,1.823552318,-0.536542184,1.03137856,1.099890853,-2.…
GO Process	GO:0006364	rRNA processing	48	188	4.96939	bottom	1.75e-15	ks	STRG0A56FBJ.g10725.t1,STRG0A56FBJ.g10730.t1,STRG0A56FBJ.g10880.t1,STRG0A56FBJ.g10943.t1,STRG0A56FBJ.g10958.t1,STRG0A56FBJ.g11504.t1,STRG0A56FBJ.g12100.t1,STRG0A56FBJ.g12816.t1,STRG0A56FBJ.g13042.t1,STRG0A56FBJ.g13127.t1,STRG0A56FBJ.g13272.t1,STRG0A56FBJ.g13403.t1,STRG0A56FBJ.g13410.t1,STRG0A56FBJ.g14054.t1,STRG0A56FBJ.g14125.t1,STRG0A56FBJ.g14652.t1,STRG0A56FBJ.g15003.t1,STRG0A56FBJ.g15032.t1,STR…	g10725.t1,g10730.t1,g10880.t1,g10943.t1,g10958.t1,g11504.t1,g12100.t1,g12816.t1,g13042.t1,g13127.t1,g13272.t1,g13403.t1,g13410.t1,g14054.t1,g14125.t1,g14652.t1,g15003.t1,g15032.t1,g15134.t1,g15532.t1,g15874.t1,g1593.t1,g16382.t1,g16731.t1,g2311.t1,g2471.t1,g2780.t1,g2843.t1,g3054.t1,g3296.t1,g3860.t1,g4790.t1,g4950.t1,g5301.t1,g6314.t1,g6819.t1,g6895.t1,g6919.t1,g7601.t1,g7668.t1,g7703.t1,g7992.t…	g10725.t1,g10730.t1,g10880.t1,g10943.t1,g10958.t1,g11504.t1,g12100.t1,g12816.t1,g13042.t1,g13127.t1,g13272.t1,g13403.t1,g13410.t1,g14054.t1,g14125.t1,g14652.t1,g15003.t1,g15032.t1,g15134.t1,g15532.t1,g15874.t1,g1593.t1,g16382.t1,g16731.t1,g2311.t1,g2471.t1,g2780.t1,g2843.t1,g3054.t1,g3296.t1,g3860.t1,g4790.t1,g4950.t1,g5301.t1,g6314.t1,g6819.t1,g6895.t1,g6919.t1,g7601.t1,g7668.t1,g7703.t1,g7992.t…	1.219714482,1.64457019,1.330053662,1.621072939,1.61515754,1.105743019,1.287950954,1.567087336,2.741363783,1.027408517,1.420638048,2.214116895,1.673276068,1.504070629,3.057315031,1.640171576,1.747120531,1.524786913,1.534775144,1.245278035,0.956981837,1.377134445,1.959919797,1.729789056,1.591407605,1.75098948,0.824006556,2.508444172,1.291321052,2.124746259,1.206235662,1.409661795,1.182797934,2.2717…
GO Process	GO:0016072	rRNA metabolic process	50	201	4.89595	bottom	2.43e-15	ks	STRG0A56FBJ.g10725.t1,STRG0A56FBJ.g10730.t1,STRG0A56FBJ.g10880.t1,STRG0A56FBJ.g10943.t1,STRG0A56FBJ.g10958.t1,STRG0A56FBJ.g11504.t1,STRG0A56FBJ.g12100.t1,STRG0A56FBJ.g12816.t1,STRG0A56FBJ.g13042.t1,STRG0A56FBJ.g13127.t1,STRG0A56FBJ.g13272.t1,STRG0A56FBJ.g13403.t1,STRG0A56FBJ.g13410.t1,STRG0A56FBJ.g14054.t1,STRG0A56FBJ.g14125.t1,STRG0A56FBJ.g14652.t1,STRG0A56FBJ.g15003.t1,STRG0A56FBJ.g15032.t1,STR…	g10725.t1,g10730.t1,g10880.t1,g10943.t1,g10958.t1,g11504.t1,g12100.t1,g12816.t1,g13042.t1,g13127.t1,g13272.t1,g13403.t1,g13410.t1,g14054.t1,g14125.t1,g14652.t1,g15003.t1,g15032.t1,g15134.t1,g15532.t1,g15874.t1,g1593.t1,g16382.t1,g16731.t1,g1804.t1,g2311.t1,g2471.t1,g2780.t1,g2843.t1,g3054.t1,g3296.t1,g3860.t1,g4790.t1,g4950.t1,g5301.t1,g5654.t1,g6314.t1,g6819.t1,g6895.t1,g6919.t1,g7601.t1,g7668.t…	g10725.t1,g10730.t1,g10880.t1,g10943.t1,g10958.t1,g11504.t1,g12100.t1,g12816.t1,g13042.t1,g13127.t1,g13272.t1,g13403.t1,g13410.t1,g14054.t1,g14125.t1,g14652.t1,g15003.t1,g15032.t1,g15134.t1,g15532.t1,g15874.t1,g1593.t1,g16382.t1,g16731.t1,g1804.t1,g2311.t1,g2471.t1,g2780.t1,g2843.t1,g3054.t1,g3296.t1,g3860.t1,g4790.t1,g4950.t1,g5301.t1,g5654.t1,g6314.t1,g6819.t1,g6895.t1,g6919.t1,g7601.t1,g7668.t…	1.219714482,1.64457019,1.330053662,1.621072939,1.61515754,1.105743019,1.287950954,1.567087336,2.741363783,1.027408517,1.420638048,2.214116895,1.673276068,1.504070629,3.057315031,1.640171576,1.747120531,1.524786913,1.534775144,1.245278035,0.956981837,1.377134445,1.959919797,1.729789056,1.17257759,1.591407605,1.75098948,0.824006556,2.508444172,1.291321052,2.124746259,1.206235662,1.409661795,1.18279…
GO Process	GO:0006629	Lipid metabolic process	143	937	2.07988	top	5.43e-14	ks	STRG0A56FBJ.g10290.t1,STRG0A56FBJ.g10566.t1,STRG0A56FBJ.g10703.t1,STRG0A56FBJ.g10833.t1,STRG0A56FBJ.g10839.t1,STRG0A56FBJ.g10961.t1,STRG0A56FBJ.g10964.t1,STRG0A56FBJ.g10965.t1,STRG0A56FBJ.g10975.t1,STRG0A56FBJ.g11126.t1,STRG0A56FBJ.g1114.t1,STRG0A56FBJ.g11201.t1,STRG0A56FBJ.g11538.t1,STRG0A56FBJ.g11541.t1,STRG0A56FBJ.g11543.t1,STRG0A56FBJ.g11588.t1,STRG0A56FBJ.g11601.t1,STRG0A56FBJ.g11633.t1,STRG…	g10290.t1,g10566.t1,g10703.t1,g10833.t1,g10839.t1,g10961.t1,g10964.t1,g10965.t1,g10975.t1,g11126.t1,g1114.t1,g11201.t1,g11538.t1,g11541.t1,g11543.t1,g11588.t1,g11601.t1,g11633.t1,g11658.t1,g11679.t1,g11694.t1,g11723.t1,g11947.t1,g12080.t1,g12096.t1,g12333.t1,g12334.t1,g1254.t1,g12540.t1,g12552.t1,g12818.t1,g12869.t1,g12881.t1,g12948.t1,g13138.t1,g13168.t1,g13232.t1,g13677.t1,g13704.t1,g13974.t1,g…	g10290.t1,g10566.t1,g10703.t1,g10833.t1,g10839.t1,g10961.t1,g10964.t1,g10965.t1,g10975.t1,g11126.t1,g1114.t1,g11201.t1,g11538.t1,g11541.t1,g11543.t1,g11588.t1,g11601.t1,g11633.t1,g11658.t1,g11679.t1,g11694.t1,g11723.t1,g11947.t1,g12080.t1,g12096.t1,g12333.t1,g12334.t1,g1254.t1,g12540.t1,g12552.t1,g12818.t1,g12869.t1,g12881.t1,g12948.t1,g13138.t1,g13168.t1,g13232.t1,g13677.t1,g13704.t1,g13974.t1,g…	-0.769387904,-1.955026005,-1.622559879,-1.2972136,0.588116581,-1.233660964,-1.859870046,-2.178866153,-0.755805256,-0.871471982,-0.814607868,-1.192275479,-1.305824839,-2.409930835,-2.283875353,-1.674451582,-1.976102221,-1.647450966,0.708569642,-1.395221824,-1.220134787,-1.707625266,1.82203744,-1.983173447,-1.143696305,-1.392196703,-2.238113402,-1.117374731,-0.954691762,0.570731486,-0.781367483,-1.…
GO Process	GO:0022618	Ribonucleoprotein complex assembly	65	150	3.89103	bottom	1.99e-12	ks	STRG0A56FBJ.g1043.t1,STRG0A56FBJ.g1065.t1,STRG0A56FBJ.g11408.t1,STRG0A56FBJ.g11663.t1,STRG0A56FBJ.g11765.t1,STRG0A56FBJ.g12100.t1,STRG0A56FBJ.g12745.t1,STRG0A56FBJ.g12958.t1,STRG0A56FBJ.g13403.t1,STRG0A56FBJ.g13787.t1,STRG0A56FBJ.g13806.t1,STRG0A56FBJ.g14125.t1,STRG0A56FBJ.g14342.t1,STRG0A56FBJ.g1472.t1,STRG0A56FBJ.g14886.t1,STRG0A56FBJ.g15090.t1,STRG0A56FBJ.g15691.t1,STRG0A56FBJ.g15902.t1,STRG0A…	g1043.t1,g1065.t1,g11408.t1,g11663.t1,g11765.t1,g12100.t1,g12745.t1,g12958.t1,g13403.t1,g13787.t1,g13806.t1,g14125.t1,g14342.t1,g1472.t1,g14886.t1,g15090.t1,g15691.t1,g15902.t1,g15915.t1,g16236.t1,g16407.t1,g16501.t1,g16703.t1,g16786.t1,g16866.t1,g16921.t1,g16953.t1,g17001.t1,g1838.t1,g2023.t1,g2078.t1,g2460.t1,g2542.t1,g2797.t1,g2844.t1,g3054.t1,g3296.t1,g3830.t1,g4280.t1,g4339.t1,g5013.t1,g5233…	g1043.t1,g1065.t1,g11408.t1,g11663.t1,g11765.t1,g12100.t1,g12745.t1,g12958.t1,g13403.t1,g13787.t1,g13806.t1,g14125.t1,g14342.t1,g1472.t1,g14886.t1,g15090.t1,g15691.t1,g15902.t1,g15915.t1,g16236.t1,g16407.t1,g16501.t1,g16703.t1,g16786.t1,g16866.t1,g16921.t1,g16953.t1,g17001.t1,g1838.t1,g2023.t1,g2078.t1,g2460.t1,g2542.t1,g2797.t1,g2844.t1,g3054.t1,g3296.t1,g3830.t1,g4280.t1,g4339.t1,g5013.t1,g5233…	0.725458895,1.892385441,1.090172389,0.984807174,1.127115123,1.287950954,1.98865,1.163260983,2.214116895,1.355900429,0.741590607,3.057315031,1.398157082,1.267105688,0.737221712,-0.719726623,1.148016534,0.928447397,0.60778817,1.34917892,1.823552318,1.03137856,1.854164198,1.140496005,1.522671927,1.124474133,1.378645564,1.723532574,0.809721044,1.334102159,1.5454733,2.272310124,0.947145543,0.853110872…
GO Process	GO:0051276	Chromosome organization	76	534	3.79571	bottom	2.13e-12	ks	STRG0A56FBJ.g10730.t1,STRG0A56FBJ.g11369.t1,STRG0A56FBJ.g11926.t1,STRG0A56FBJ.g12575.t1,STRG0A56FBJ.g1274.t1,STRG0A56FBJ.g12928.t1,STRG0A56FBJ.g12939.t1,STRG0A56FBJ.g13240.t1,STRG0A56FBJ.g13279.t1,STRG0A56FBJ.g13480.t1,STRG0A56FBJ.g13497.t1,STRG0A56FBJ.g13554.t1,STRG0A56FBJ.g13567.t1,STRG0A56FBJ.g13705.t1,STRG0A56FBJ.g13823.t1,STRG0A56FBJ.g14053.t1,STRG0A56FBJ.g1411.t1,STRG0A56FBJ.g14143.t1,STRG0…	g10730.t1,g11369.t1,g11926.t1,g12575.t1,g1274.t1,g12928.t1,g12939.t1,g13240.t1,g13279.t1,g13480.t1,g13497.t1,g13554.t1,g13567.t1,g13705.t1,g13823.t1,g14053.t1,g1411.t1,g14143.t1,g14405.t1,g15039.t1,g15498.t1,g155.t1,g16073.t1,g16459.t1,g16515.t1,g16703.t1,g16727.t1,g16882.t1,g1838.t1,g2291.t1,g2489.t1,g2520.t1,g2535.t1,g3271.t1,g3309.t1,g3744.t1,g4246.t1,g4402.t1,g4896.t1,g5003.t1,g5013.t1,g5301.…	g10730.t1,g11369.t1,g11926.t1,g12575.t1,g1274.t1,g12928.t1,g12939.t1,g13240.t1,g13279.t1,g13480.t1,g13497.t1,g13554.t1,g13567.t1,g13705.t1,g13823.t1,g14053.t1,g1411.t1,g14143.t1,g14405.t1,g15039.t1,g15498.t1,g155.t1,g16073.t1,g16459.t1,g16515.t1,g16703.t1,g16727.t1,g16882.t1,g1838.t1,g2291.t1,g2489.t1,g2520.t1,g2535.t1,g3271.t1,g3309.t1,g3744.t1,g4246.t1,g4402.t1,g4896.t1,g5003.t1,g5013.t1,g5301.…	1.64457019,1.07180322,1.048116873,2.645434198,0.952117724,1.400562672,1.946426853,1.403764342,2.9608896,1.083975433,1.234002753,1.322662897,-2.400641123,0.797574806,1.181457299,1.403403191,1.768671353,1.249711279,1.002378107,1.39339247,2.583958876,1.300966725,1.740947263,1.475077877,3.198996552,1.854164198,0.677920055,0.899961293,0.809721044,1.180377591,1.593126435,0.996657562,3.100627509,2.20461…
GO Process	GO:0000398	mRNA splicing, via spliceosome	71	185	3.4084	bottom	3.55e-12	ks	STRG0A56FBJ.g10263.t1,STRG0A56FBJ.g1043.t1,STRG0A56FBJ.g10715.t1,STRG0A56FBJ.g11408.t1,STRG0A56FBJ.g11764.t1,STRG0A56FBJ.g11768.t1,STRG0A56FBJ.g11776.t1,STRG0A56FBJ.g11879.t1,STRG0A56FBJ.g12745.t1,STRG0A56FBJ.g12779.t1,STRG0A56FBJ.g12801.t1,STRG0A56FBJ.g12931.t1,STRG0A56FBJ.g12958.t1,STRG0A56FBJ.g13035.t1,STRG0A56FBJ.g13050.t1,STRG0A56FBJ.g13158.t1,STRG0A56FBJ.g13509.t1,STRG0A56FBJ.g13553.t1,STRG…	g10263.t1,g1043.t1,g10715.t1,g11408.t1,g11764.t1,g11768.t1,g11776.t1,g11879.t1,g12745.t1,g12779.t1,g12801.t1,g12931.t1,g12958.t1,g13035.t1,g13050.t1,g13158.t1,g13509.t1,g13553.t1,g13806.t1,g14123.t1,g14886.t1,g15003.t1,g15090.t1,g15223.t1,g15228.t1,g15400.t1,g15532.t1,g15553.t1,g15659.t1,g15691.t1,g15902.t1,g15915.t1,g16337.t1,g1639.t1,g16866.t1,g16881.t1,g2006.t1,g2460.t1,g2708.t1,g2735.t1,g2797…	g10263.t1,g1043.t1,g10715.t1,g11408.t1,g11764.t1,g11768.t1,g11776.t1,g11879.t1,g12745.t1,g12779.t1,g12801.t1,g12931.t1,g12958.t1,g13035.t1,g13050.t1,g13158.t1,g13509.t1,g13553.t1,g13806.t1,g14123.t1,g14886.t1,g15003.t1,g15090.t1,g15223.t1,g15228.t1,g15400.t1,g15532.t1,g15553.t1,g15659.t1,g15691.t1,g15902.t1,g15915.t1,g16337.t1,g1639.t1,g16866.t1,g16881.t1,g2006.t1,g2460.t1,g2708.t1,g2735.t1,g2797…	1.270511721,0.725458895,1.058697364,1.090172389,1.237654023,1.684418984,1.470531856,0.886978057,1.98865,1.60224546,0.52463068,0.812894382,1.163260983,1.345176512,0.965357409,1.057367674,1.039709714,1.201525018,0.741590607,1.488579723,0.737221712,1.747120531,-0.719726623,1.36018555,1.132724558,0.973876704,1.245278035,0.766026895,-1.441850494,1.148016534,0.928447397,0.60778817,1.433353378,1.9861551…
GO Process	GO:0007018	Microtubule-based movement	88	314	2.50704	top	5.1e-11	ks	STRG0A56FBJ.g10314.t1,STRG0A56FBJ.g10758.t1,STRG0A56FBJ.g10846.t1,STRG0A56FBJ.g10858.t1,STRG0A56FBJ.g10917.t1,STRG0A56FBJ.g10924.t1,STRG0A56FBJ.g1107.t1,STRG0A56FBJ.g11123.t1,STRG0A56FBJ.g11192.t1,STRG0A56FBJ.g11427.t1,STRG0A56FBJ.g1163.t1,STRG0A56FBJ.g11669.t1,STRG0A56FBJ.g11838.t1,STRG0A56FBJ.g11914.t1,STRG0A56FBJ.g12026.t1,STRG0A56FBJ.g12355.t1,STRG0A56FBJ.g13061.t1,STRG0A56FBJ.g13599.t1,STRG0…	g10314.t1,g10758.t1,g10846.t1,g10858.t1,g10917.t1,g10924.t1,g1107.t1,g11123.t1,g11192.t1,g11427.t1,g1163.t1,g11669.t1,g11838.t1,g11914.t1,g12026.t1,g12355.t1,g13061.t1,g13599.t1,g13835.t1,g13937.t1,g14096.t1,g14290.t1,g14354.t1,g14407.t1,g14418.t1,g14423.t1,g14485.t1,g14497.t1,g14798.t1,g14903.t1,g15148.t1,g155.t1,g15558.t1,g15613.t1,g15901.t1,g15997.t1,g16005.t1,g16848.t1,g16923.t1,g1761.t1,g193…	g10314.t1,g10758.t1,g10846.t1,g10858.t1,g10917.t1,g10924.t1,g1107.t1,g11123.t1,g11192.t1,g11427.t1,g1163.t1,g11669.t1,g11838.t1,g11914.t1,g12026.t1,g12355.t1,g13061.t1,g13599.t1,g13835.t1,g13937.t1,g14096.t1,g14290.t1,g14354.t1,g14407.t1,g14418.t1,g14423.t1,g14485.t1,g14497.t1,g14798.t1,g14903.t1,g15148.t1,g155.t1,g15558.t1,g15613.t1,g15901.t1,g15997.t1,g16005.t1,g16848.t1,g16923.t1,g1761.t1,g193…	-0.611404417,-1.275611172,-1.738312781,-1.841552909,-2.043393813,-1.822056587,-1.290666174,-1.699788862,-1.459083788,-1.548932509,-3.157142953,-2.031043502,0.904655247,-1.526120692,0.870119299,-1.309788907,-0.720494618,-2.698331529,-1.634305602,-1.214489932,-0.934510256,0.88774103,-1.131761386,-4.29407144,-1.9227885,-1.211608658,-1.936317347,-0.679914888,-1.617911107,-0.729194633,-1.73002743,1.30…
GO Process	GO:0044255	Cellular lipid metabolic process	102	739	2.10628	top	8.85e-11	ks	STRG0A56FBJ.g10290.t1,STRG0A56FBJ.g10566.t1,STRG0A56FBJ.g10703.t1,STRG0A56FBJ.g10833.t1,STRG0A56FBJ.g10839.t1,STRG0A56FBJ.g11126.t1,STRG0A56FBJ.g11538.t1,STRG0A56FBJ.g11541.t1,STRG0A56FBJ.g11543.t1,STRG0A56FBJ.g11588.t1,STRG0A56FBJ.g11601.t1,STRG0A56FBJ.g11658.t1,STRG0A56FBJ.g11679.t1,STRG0A56FBJ.g11694.t1,STRG0A56FBJ.g11723.t1,STRG0A56FBJ.g11947.t1,STRG0A56FBJ.g12080.t1,STRG0A56FBJ.g12096.t1,STR…	g10290.t1,g10566.t1,g10703.t1,g10833.t1,g10839.t1,g11126.t1,g11538.t1,g11541.t1,g11543.t1,g11588.t1,g11601.t1,g11658.t1,g11679.t1,g11694.t1,g11723.t1,g11947.t1,g12080.t1,g12096.t1,g12333.t1,g12334.t1,g1254.t1,g12540.t1,g12552.t1,g12948.t1,g13138.t1,g13168.t1,g13232.t1,g13677.t1,g13704.t1,g14040.t1,g14050.t1,g14120.t1,g14236.t1,g14349.t1,g14406.t1,g14462.t1,g14474.t1,g14475.t1,g14864.t1,g1495.t1,g…	g10290.t1,g10566.t1,g10703.t1,g10833.t1,g10839.t1,g11126.t1,g11538.t1,g11541.t1,g11543.t1,g11588.t1,g11601.t1,g11658.t1,g11679.t1,g11694.t1,g11723.t1,g11947.t1,g12080.t1,g12096.t1,g12333.t1,g12334.t1,g1254.t1,g12540.t1,g12552.t1,g12948.t1,g13138.t1,g13168.t1,g13232.t1,g13677.t1,g13704.t1,g14040.t1,g14050.t1,g14120.t1,g14236.t1,g14349.t1,g14406.t1,g14462.t1,g14474.t1,g14475.t1,g14864.t1,g1495.t1,g…	-0.769387904,-1.955026005,-1.622559879,-1.2972136,0.588116581,-0.871471982,-1.305824839,-2.409930835,-2.283875353,-1.674451582,-1.976102221,0.708569642,-1.395221824,-1.220134787,-1.707625266,1.82203744,-1.983173447,-1.143696305,-1.392196703,-2.238113402,-1.117374731,-0.954691762,0.570731486,-1.69738072,1.674839412,-1.167712946,-1.600701384,-1.725429596,-1.629847694,-0.79214288,-0.603196985,-1.924…
GO Process	GO:0002181	Cytoplasmic translation	36	60	4.1859	bottom	2.05e-10	ks	STRG0A56FBJ.g10203.t1,STRG0A56FBJ.g1065.t1,STRG0A56FBJ.g11765.t1,STRG0A56FBJ.g12100.t1,STRG0A56FBJ.g1219.t1,STRG0A56FBJ.g13273.t1,STRG0A56FBJ.g1340.t1,STRG0A56FBJ.g14342.t1,STRG0A56FBJ.g1472.t1,STRG0A56FBJ.g1514.t1,STRG0A56FBJ.g15551.t1,STRG0A56FBJ.g15743.t1,STRG0A56FBJ.g16236.t1,STRG0A56FBJ.g16407.t1,STRG0A56FBJ.g16427.t1,STRG0A56FBJ.g16501.t1,STRG0A56FBJ.g16786.t1,STRG0A56FBJ.g16921.t1,STRG0A56…	g10203.t1,g1065.t1,g11765.t1,g12100.t1,g1219.t1,g13273.t1,g1340.t1,g14342.t1,g1472.t1,g1514.t1,g15551.t1,g15743.t1,g16236.t1,g16407.t1,g16427.t1,g16501.t1,g16786.t1,g16921.t1,g16953.t1,g2023.t1,g2542.t1,g2844.t1,g2961.t1,g299.t1,g4280.t1,g5233.t1,g5248.t1,g5249.t1,g5529.t1,g5658.t1,g631.t1,g6642.t1,g6651.t1,g8375.t1,g8379.t1,g9322.t1	g10203.t1,g1065.t1,g11765.t1,g12100.t1,g1219.t1,g13273.t1,g1340.t1,g14342.t1,g1472.t1,g1514.t1,g15551.t1,g15743.t1,g16236.t1,g16407.t1,g16427.t1,g16501.t1,g16786.t1,g16921.t1,g16953.t1,g2023.t1,g2542.t1,g2844.t1,g2961.t1,g299.t1,g4280.t1,g5233.t1,g5248.t1,g5249.t1,g5529.t1,g5658.t1,g631.t1,g6642.t1,g6651.t1,g8375.t1,g8379.t1,g9322.t1	1.619615035,1.892385441,1.127115123,1.287950954,1.563463688,1.407417647,1.719048723,1.398157082,1.267105688,1.60631234,1.372783485,1.810596187,1.34917892,1.823552318,1.71958619,1.03137856,1.140496005,1.124474133,1.378645564,1.334102159,0.947145543,1.603193747,0.689976678,1.335290211,1.569831294,1.477380419,0.935043448,1.195311406,1.40203713,1.224197699,1.377602225,1.022451237,1.192178181,1.232910…
GO Process	GO:0006259	DNA metabolic process	63	531	3.95821	bottom	4.06e-10	ks	STRG0A56FBJ.g10285.t1,STRG0A56FBJ.g10956.t1,STRG0A56FBJ.g11146.t1,STRG0A56FBJ.g11149.t1,STRG0A56FBJ.g11450.t1,STRG0A56FBJ.g11760.t1,STRG0A56FBJ.g12483.t1,STRG0A56FBJ.g12813.t1,STRG0A56FBJ.g12837.t1,STRG0A56FBJ.g12895.t1,STRG0A56FBJ.g12904.t1,STRG0A56FBJ.g12939.t1,STRG0A56FBJ.g13279.t1,STRG0A56FBJ.g13564.t1,STRG0A56FBJ.g13567.t1,STRG0A56FBJ.g14053.t1,STRG0A56FBJ.g14405.t1,STRG0A56FBJ.g14886.t1,STR…	g10285.t1,g10956.t1,g11146.t1,g11149.t1,g11450.t1,g11760.t1,g12483.t1,g12813.t1,g12837.t1,g12895.t1,g12904.t1,g12939.t1,g13279.t1,g13564.t1,g13567.t1,g14053.t1,g14405.t1,g14886.t1,g15498.t1,g1641.t1,g16515.t1,g16703.t1,g16727.t1,g16882.t1,g1737.t1,g1838.t1,g2291.t1,g2520.t1,g2535.t1,g3587.t1,g3781.t1,g3823.t1,g4234.t1,g4896.t1,g4950.t1,g5003.t1,g5013.t1,g5130.t1,g5301.t1,g545.t1,g5710.t1,g5758.t1…	g10285.t1,g10956.t1,g11146.t1,g11149.t1,g11450.t1,g11760.t1,g12483.t1,g12813.t1,g12837.t1,g12895.t1,g12904.t1,g12939.t1,g13279.t1,g13564.t1,g13567.t1,g14053.t1,g14405.t1,g14886.t1,g15498.t1,g1641.t1,g16515.t1,g16703.t1,g16727.t1,g16882.t1,g1737.t1,g1838.t1,g2291.t1,g2520.t1,g2535.t1,g3587.t1,g3781.t1,g3823.t1,g4234.t1,g4896.t1,g4950.t1,g5003.t1,g5013.t1,g5130.t1,g5301.t1,g545.t1,g5710.t1,g5758.t1…	0.726460094,1.294215006,2.8846113,-2.516745613,1.250435787,2.803416794,0.716963815,3.136441327,1.198708879,1.165233075,1.154561674,1.946426853,2.9608896,1.623357739,-2.400641123,1.403403191,1.002378107,0.737221712,2.583958876,1.739105484,3.198996552,1.854164198,0.677920055,0.899961293,1.053635861,0.809721044,1.180377591,0.996657562,3.100627509,-0.846670521,0.87878332,2.905608074,1.003020849,1.480…
GO Process	GO:0042273	Ribosomal large subunit biogenesis	29	67	5.25051	bottom	6.85e-10	ks	STRG0A56FBJ.g11198.t1,STRG0A56FBJ.g12575.t1,STRG0A56FBJ.g13127.t1,STRG0A56FBJ.g13157.t1,STRG0A56FBJ.g13245.t1,STRG0A56FBJ.g1340.t1,STRG0A56FBJ.g13403.t1,STRG0A56FBJ.g14125.t1,STRG0A56FBJ.g15032.t1,STRG0A56FBJ.g17001.t1,STRG0A56FBJ.g3054.t1,STRG0A56FBJ.g3296.t1,STRG0A56FBJ.g3860.t1,STRG0A56FBJ.g4790.t1,STRG0A56FBJ.g5233.t1,STRG0A56FBJ.g5529.t1,STRG0A56FBJ.g5658.t1,STRG0A56FBJ.g6314.t1,STRG0A56FBJ.…	g11198.t1,g12575.t1,g13127.t1,g13157.t1,g13245.t1,g1340.t1,g13403.t1,g14125.t1,g15032.t1,g17001.t1,g3054.t1,g3296.t1,g3860.t1,g4790.t1,g5233.t1,g5529.t1,g5658.t1,g6314.t1,g6819.t1,g6895.t1,g6919.t1,g7553.t1,g7992.t1,g8250.t1,g8524.t1,g8646.t1,g8947.t1,g9010.t1,g9322.t1	g11198.t1,g12575.t1,g13127.t1,g13157.t1,g13245.t1,g1340.t1,g13403.t1,g14125.t1,g15032.t1,g17001.t1,g3054.t1,g3296.t1,g3860.t1,g4790.t1,g5233.t1,g5529.t1,g5658.t1,g6314.t1,g6819.t1,g6895.t1,g6919.t1,g7553.t1,g7992.t1,g8250.t1,g8524.t1,g8646.t1,g8947.t1,g9010.t1,g9322.t1	0.956248288,2.645434198,1.027408517,1.441324248,1.447232149,1.719048723,2.214116895,3.057315031,1.524786913,1.723532574,1.291321052,2.124746259,1.206235662,1.409661795,1.477380419,1.40203713,1.224197699,1.154708524,2.884532399,1.947776396,1.8357519,1.423745735,2.233619539,1.631659263,1.710424135,1.972004404,2.502462709,2.190687016,1.832104044
GO Process	GO:0051246	Regulation of protein metabolic process	195	1262	1.92924	bottom	1.06e-09	ks	STRG0A56FBJ.g10334.t1,STRG0A56FBJ.g10364.t1,STRG0A56FBJ.g1065.t1,STRG0A56FBJ.g10754.t1,STRG0A56FBJ.g10878.t1,STRG0A56FBJ.g11066.t1,STRG0A56FBJ.g11151.t1,STRG0A56FBJ.g11217.t1,STRG0A56FBJ.g11285.t1,STRG0A56FBJ.g11360.t1,STRG0A56FBJ.g1165.t1,STRG0A56FBJ.g11763.t1,STRG0A56FBJ.g11765.t1,STRG0A56FBJ.g11879.t1,STRG0A56FBJ.g11926.t1,STRG0A56FBJ.g11953.t1,STRG0A56FBJ.g11987.t1,STRG0A56FBJ.g12120.t1,STRG0…	g10334.t1,g10364.t1,g1065.t1,g10754.t1,g10878.t1,g11066.t1,g11151.t1,g11217.t1,g11285.t1,g11360.t1,g1165.t1,g11763.t1,g11765.t1,g11879.t1,g11926.t1,g11953.t1,g11987.t1,g12120.t1,g1221.t1,g12282.t1,g12296.t1,g12448.t1,g12552.t1,g12868.t1,g12895.t1,g12914.t1,g13260.t1,g13267.t1,g13300.t1,g13415.t1,g13420.t1,g13520.t1,g13530.t1,g1380.t1,g13929.t1,g14118.t1,g14268.t1,g14298.t1,g14300.t1,g14342.t1,g14…	g10334.t1,g10364.t1,g1065.t1,g10754.t1,g10878.t1,g11066.t1,g11151.t1,g11217.t1,g11285.t1,g11360.t1,g1165.t1,g11763.t1,g11765.t1,g11879.t1,g11926.t1,g11953.t1,g11987.t1,g12120.t1,g1221.t1,g12282.t1,g12296.t1,g12448.t1,g12552.t1,g12868.t1,g12895.t1,g12914.t1,g13260.t1,g13267.t1,g13300.t1,g13415.t1,g13420.t1,g13520.t1,g13530.t1,g1380.t1,g13929.t1,g14118.t1,g14268.t1,g14298.t1,g14300.t1,g14342.t1,g14…	0.980851571,-1.022479236,1.892385441,1.186857663,1.209600662,-1.083271327,0.667149877,-0.434951345,0.772037949,-1.036951642,1.607019364,0.951959336,1.127115123,0.886978057,1.048116873,1.345128774,-1.357705498,-0.771826468,-1.73683163,1.11437724,0.987723101,-1.269301867,0.570731486,0.970214216,1.165233075,1.186783884,1.535837816,0.866781681,-1.878272315,1.223800632,-0.585097553,-1.990783056,-1.193…
GO Process	GO:0043412	Macromolecule modification	191	2161	2.15862	bottom	1.92e-09	ks	STRG0A56FBJ.g10084.t1,STRG0A56FBJ.g10133.t1,STRG0A56FBJ.g10249.t1,STRG0A56FBJ.g10285.t1,STRG0A56FBJ.g10309.t1,STRG0A56FBJ.g10310.t1,STRG0A56FBJ.g10334.t1,STRG0A56FBJ.g10364.t1,STRG0A56FBJ.g10545.t1,STRG0A56FBJ.g10555.t1,STRG0A56FBJ.g10629.t1,STRG0A56FBJ.g1068.t1,STRG0A56FBJ.g10754.t1,STRG0A56FBJ.g10956.t1,STRG0A56FBJ.g1112.t1,STRG0A56FBJ.g11122.t1,STRG0A56FBJ.g11369.t1,STRG0A56FBJ.g11375.t1,STRG0…	g10084.t1,g10133.t1,g10249.t1,g10285.t1,g10309.t1,g10310.t1,g10334.t1,g10364.t1,g10545.t1,g10555.t1,g10629.t1,g1068.t1,g10754.t1,g10956.t1,g1112.t1,g11122.t1,g11369.t1,g11375.t1,g12038.t1,g12187.t1,g12346.t1,g12513.t1,g12514.t1,g12525.t1,g12558.t1,g12736.t1,g12745.t1,g12801.t1,g12837.t1,g12928.t1,g13042.t1,g13152.t1,g13267.t1,g13272.t1,g13279.t1,g13300.t1,g13343.t1,g13403.t1,g13406.t1,g13554.t1,g…	g10084.t1,g10133.t1,g10249.t1,g10285.t1,g10309.t1,g10310.t1,g10334.t1,g10364.t1,g10545.t1,g10555.t1,g10629.t1,g1068.t1,g10754.t1,g10956.t1,g1112.t1,g11122.t1,g11369.t1,g11375.t1,g12038.t1,g12187.t1,g12346.t1,g12513.t1,g12514.t1,g12525.t1,g12558.t1,g12736.t1,g12745.t1,g12801.t1,g12837.t1,g12928.t1,g13042.t1,g13152.t1,g13267.t1,g13272.t1,g13279.t1,g13300.t1,g13343.t1,g13403.t1,g13406.t1,g13554.t1,g…	0.688230921,1.383833489,0.963537693,0.726460094,1.24228041,2.007165407,0.980851571,-1.022479236,1.723201784,2.525495933,-1.166703032,-0.880086988,1.186857663,1.294215006,2.352524127,-1.277151728,1.07180322,0.900825465,0.907283634,1.274768331,-1.517932058,0.728606639,0.924535494,1.33218056,1.340146323,0.616468819,1.98865,0.52463068,1.198708879,1.400562672,2.741363783,1.183889374,0.866781681,1.4206…
GO Process	GO:0006355	Regulation of transcription, DNA-templated	136	1395	2.1939	bottom	2.18e-09	ks	STRG0A56FBJ.g10308.t1,STRG0A56FBJ.g10334.t1,STRG0A56FBJ.g10725.t1,STRG0A56FBJ.g109.t1,STRG0A56FBJ.g10948.t1,STRG0A56FBJ.g11151.t1,STRG0A56FBJ.g11217.t1,STRG0A56FBJ.g11369.t1,STRG0A56FBJ.g11431.t1,STRG0A56FBJ.g11450.t1,STRG0A56FBJ.g11626.t1,STRG0A56FBJ.g11776.t1,STRG0A56FBJ.g11879.t1,STRG0A56FBJ.g1206.t1,STRG0A56FBJ.g12187.t1,STRG0A56FBJ.g12513.t1,STRG0A56FBJ.g12575.t1,STRG0A56FBJ.g12837.t1,STRG0A…	g10308.t1,g10334.t1,g10725.t1,g109.t1,g10948.t1,g11151.t1,g11217.t1,g11369.t1,g11431.t1,g11450.t1,g11626.t1,g11776.t1,g11879.t1,g1206.t1,g12187.t1,g12513.t1,g12575.t1,g12837.t1,g12958.t1,g13247.t1,g13250.t1,g13267.t1,g13390.t1,g13705.t1,g14143.t1,g14160.t1,g14268.t1,g14346.t1,g14821.t1,g1495.t1,g1496.t1,g14992.t1,g14993.t1,g15033.t1,g15039.t1,g15058.t1,g15135.t1,g15207.t1,g15242.t1,g15326.t1,g153…	g10308.t1,g10334.t1,g10725.t1,g109.t1,g10948.t1,g11151.t1,g11217.t1,g11369.t1,g11431.t1,g11450.t1,g11626.t1,g11776.t1,g11879.t1,g1206.t1,g12187.t1,g12513.t1,g12575.t1,g12837.t1,g12958.t1,g13247.t1,g13250.t1,g13267.t1,g13390.t1,g13705.t1,g14143.t1,g14160.t1,g14268.t1,g14346.t1,g14821.t1,g1495.t1,g1496.t1,g14992.t1,g14993.t1,g15033.t1,g15039.t1,g15058.t1,g15135.t1,g15207.t1,g15242.t1,g15326.t1,g153…	1.978994003,0.980851571,1.219714482,0.979392542,1.830854422,0.667149877,-0.434951345,1.07180322,1.33275789,1.250435787,1.323694824,1.470531856,0.886978057,0.896245211,1.274768331,0.728606639,2.645434198,1.198708879,1.163260983,-0.962807666,1.420357293,0.866781681,-0.56891928,0.797574806,1.249711279,1.410958354,1.171657699,0.932890417,1.359583046,-2.768579105,-2.318726146,0.980139671,0.871068579,1…
GO Process	GO:1903311	Regulation of mRNA metabolic process	54	148	3.61637	bottom	2.5e-09	ks	STRG0A56FBJ.g10824.t1,STRG0A56FBJ.g11285.t1,STRG0A56FBJ.g11626.t1,STRG0A56FBJ.g11879.t1,STRG0A56FBJ.g11953.t1,STRG0A56FBJ.g12187.t1,STRG0A56FBJ.g12745.t1,STRG0A56FBJ.g12779.t1,STRG0A56FBJ.g12931.t1,STRG0A56FBJ.g13035.t1,STRG0A56FBJ.g14118.t1,STRG0A56FBJ.g14268.t1,STRG0A56FBJ.g1441.t1,STRG0A56FBJ.g15033.t1,STRG0A56FBJ.g15090.t1,STRG0A56FBJ.g15227.t1,STRG0A56FBJ.g15228.t1,STRG0A56FBJ.g15553.t1,STRG…	g10824.t1,g11285.t1,g11626.t1,g11879.t1,g11953.t1,g12187.t1,g12745.t1,g12779.t1,g12931.t1,g13035.t1,g14118.t1,g14268.t1,g1441.t1,g15033.t1,g15090.t1,g15227.t1,g15228.t1,g15553.t1,g15609.t1,g16037.t1,g16382.t1,g16482.t1,g16664.t1,g16866.t1,g16882.t1,g1923.t1,g2174.t1,g2735.t1,g3152.t1,g3585.t1,g3649.t1,g3830.t1,g4339.t1,g4896.t1,g5088.t1,g5130.t1,g5290.t1,g5700.t1,g5775.t1,g5836.t1,g591.t1,g6070.t…	g10824.t1,g11285.t1,g11626.t1,g11879.t1,g11953.t1,g12187.t1,g12745.t1,g12779.t1,g12931.t1,g13035.t1,g14118.t1,g14268.t1,g1441.t1,g15033.t1,g15090.t1,g15227.t1,g15228.t1,g15553.t1,g15609.t1,g16037.t1,g16382.t1,g16482.t1,g16664.t1,g16866.t1,g16882.t1,g1923.t1,g2174.t1,g2735.t1,g3152.t1,g3585.t1,g3649.t1,g3830.t1,g4339.t1,g4896.t1,g5088.t1,g5130.t1,g5290.t1,g5700.t1,g5775.t1,g5836.t1,g591.t1,g6070.t…	3.076915162,0.772037949,1.323694824,0.886978057,1.345128774,1.274768331,1.98865,1.60224546,0.812894382,1.345176512,1.072258989,1.171657699,1.377012035,1.162423469,-0.719726623,1.825505464,1.132724558,0.766026895,0.85298053,0.617361382,1.959919797,1.025867303,-2.180683348,1.522671927,0.899961293,1.185504639,1.438168223,1.332701188,0.893928334,2.425886827,0.580752568,1.178909648,1.329450267,1.48052…
GO Process	GO:0045935	Positive regulation of nucleobase-containing compound metabolic process	110	842	2.40298	bottom	7.55e-09	ks	STRG0A56FBJ.g10334.t1,STRG0A56FBJ.g10725.t1,STRG0A56FBJ.g10824.t1,STRG0A56FBJ.g109.t1,STRG0A56FBJ.g11151.t1,STRG0A56FBJ.g11285.t1,STRG0A56FBJ.g11369.t1,STRG0A56FBJ.g11450.t1,STRG0A56FBJ.g11776.t1,STRG0A56FBJ.g11879.t1,STRG0A56FBJ.g1206.t1,STRG0A56FBJ.g12187.t1,STRG0A56FBJ.g12513.t1,STRG0A56FBJ.g12575.t1,STRG0A56FBJ.g12837.t1,STRG0A56FBJ.g13035.t1,STRG0A56FBJ.g13247.t1,STRG0A56FBJ.g13250.t1,STRG0A…	g10334.t1,g10725.t1,g10824.t1,g109.t1,g11151.t1,g11285.t1,g11369.t1,g11450.t1,g11776.t1,g11879.t1,g1206.t1,g12187.t1,g12513.t1,g12575.t1,g12837.t1,g13035.t1,g13247.t1,g13250.t1,g13267.t1,g13390.t1,g13705.t1,g14118.t1,g14143.t1,g14265.t1,g14346.t1,g1441.t1,g14847.t1,g14992.t1,g14993.t1,g15033.t1,g15058.t1,g15553.t1,g15777.t1,g15778.t1,g15821.t1,g15828.t1,g15904.t1,g16037.t1,g1613.t1,g16382.t1,g165…	g10334.t1,g10725.t1,g10824.t1,g109.t1,g11151.t1,g11285.t1,g11369.t1,g11450.t1,g11776.t1,g11879.t1,g1206.t1,g12187.t1,g12513.t1,g12575.t1,g12837.t1,g13035.t1,g13247.t1,g13250.t1,g13267.t1,g13390.t1,g13705.t1,g14118.t1,g14143.t1,g14265.t1,g14346.t1,g1441.t1,g14847.t1,g14992.t1,g14993.t1,g15033.t1,g15058.t1,g15553.t1,g15777.t1,g15778.t1,g15821.t1,g15828.t1,g15904.t1,g16037.t1,g1613.t1,g16382.t1,g165…	0.980851571,1.219714482,3.076915162,0.979392542,0.667149877,0.772037949,1.07180322,1.250435787,1.470531856,0.886978057,0.896245211,1.274768331,0.728606639,2.645434198,1.198708879,1.345176512,-0.962807666,1.420357293,0.866781681,-0.56891928,0.797574806,1.072258989,1.249711279,2.109140945,0.932890417,1.377012035,2.079494856,0.980139671,0.871068579,1.162423469,-0.907349351,0.766026895,-0.499906811,-…
GO Process	GO:0043933	Protein-containing complex organization	159	750	2.14174	bottom	8.06e-09	ks	STRG0A56FBJ.g1043.t1,STRG0A56FBJ.g1054.t1,STRG0A56FBJ.g1054.t2,STRG0A56FBJ.g1065.t1,STRG0A56FBJ.g11123.t1,STRG0A56FBJ.g11149.t1,STRG0A56FBJ.g11192.t1,STRG0A56FBJ.g11200.t1,STRG0A56FBJ.g11375.t1,STRG0A56FBJ.g11408.t1,STRG0A56FBJ.g1163.t1,STRG0A56FBJ.g11663.t1,STRG0A56FBJ.g11669.t1,STRG0A56FBJ.g11760.t1,STRG0A56FBJ.g11765.t1,STRG0A56FBJ.g11914.t1,STRG0A56FBJ.g11926.t1,STRG0A56FBJ.g11947.t1,STRG0A56…	g1043.t1,g1054.t1,g1054.t2,g1065.t1,g11123.t1,g11149.t1,g11192.t1,g11200.t1,g11375.t1,g11408.t1,g1163.t1,g11663.t1,g11669.t1,g11760.t1,g11765.t1,g11914.t1,g11926.t1,g11947.t1,g12100.t1,g12448.t1,g1274.t1,g12745.t1,g12958.t1,g13279.t1,g13319.t1,g13403.t1,g13480.t1,g13780.t1,g13787.t1,g13806.t1,g13929.t1,g13973.t1,g14053.t1,g14125.t1,g14261.t1,g14262.t1,g14290.t1,g14300.t1,g14342.t1,g14365.t1,g1472…	g1043.t1,g1054.t1,g1054.t2,g1065.t1,g11123.t1,g11149.t1,g11192.t1,g11200.t1,g11375.t1,g11408.t1,g1163.t1,g11663.t1,g11669.t1,g11760.t1,g11765.t1,g11914.t1,g11926.t1,g11947.t1,g12100.t1,g12448.t1,g1274.t1,g12745.t1,g12958.t1,g13279.t1,g13319.t1,g13403.t1,g13480.t1,g13780.t1,g13787.t1,g13806.t1,g13929.t1,g13973.t1,g14053.t1,g14125.t1,g14261.t1,g14262.t1,g14290.t1,g14300.t1,g14342.t1,g14365.t1,g1472…	0.725458895,-1.614412262,-2.291080842,1.892385441,-1.699788862,-2.516745613,-1.459083788,0.787680476,0.900825465,1.090172389,-3.157142953,0.984807174,-2.031043502,2.803416794,1.127115123,-1.526120692,1.048116873,1.82203744,1.287950954,-1.269301867,0.952117724,1.98865,1.163260983,2.9608896,-1.071236335,2.214116895,1.083975433,-1.772271559,1.355900429,0.741590607,1.370464581,0.89763724,1.403403191,…
GO Process	GO:0010557	Positive regulation of macromolecule biosynthetic process	102	759	2.50843	bottom	1.14e-08	ks	STRG0A56FBJ.g10334.t1,STRG0A56FBJ.g10725.t1,STRG0A56FBJ.g109.t1,STRG0A56FBJ.g11151.t1,STRG0A56FBJ.g11369.t1,STRG0A56FBJ.g11450.t1,STRG0A56FBJ.g11763.t1,STRG0A56FBJ.g11776.t1,STRG0A56FBJ.g11879.t1,STRG0A56FBJ.g1206.t1,STRG0A56FBJ.g12187.t1,STRG0A56FBJ.g12282.t1,STRG0A56FBJ.g12513.t1,STRG0A56FBJ.g12575.t1,STRG0A56FBJ.g12837.t1,STRG0A56FBJ.g13247.t1,STRG0A56FBJ.g13250.t1,STRG0A56FBJ.g13267.t1,STRG0A…	g10334.t1,g10725.t1,g109.t1,g11151.t1,g11369.t1,g11450.t1,g11763.t1,g11776.t1,g11879.t1,g1206.t1,g12187.t1,g12282.t1,g12513.t1,g12575.t1,g12837.t1,g13247.t1,g13250.t1,g13267.t1,g13390.t1,g13415.t1,g13705.t1,g14143.t1,g14265.t1,g14268.t1,g14346.t1,g1441.t1,g14847.t1,g14992.t1,g14993.t1,g15058.t1,g15777.t1,g15778.t1,g15821.t1,g15828.t1,g15904.t1,g1613.t1,g16510.t1,g16595.t1,g16625.t1,g16683.t1,g167…	g10334.t1,g10725.t1,g109.t1,g11151.t1,g11369.t1,g11450.t1,g11763.t1,g11776.t1,g11879.t1,g1206.t1,g12187.t1,g12282.t1,g12513.t1,g12575.t1,g12837.t1,g13247.t1,g13250.t1,g13267.t1,g13390.t1,g13415.t1,g13705.t1,g14143.t1,g14265.t1,g14268.t1,g14346.t1,g1441.t1,g14847.t1,g14992.t1,g14993.t1,g15058.t1,g15777.t1,g15778.t1,g15821.t1,g15828.t1,g15904.t1,g1613.t1,g16510.t1,g16595.t1,g16625.t1,g16683.t1,g167…	0.980851571,1.219714482,0.979392542,0.667149877,1.07180322,1.250435787,0.951959336,1.470531856,0.886978057,0.896245211,1.274768331,1.11437724,0.728606639,2.645434198,1.198708879,-0.962807666,1.420357293,0.866781681,-0.56891928,1.223800632,0.797574806,1.249711279,2.109140945,1.171657699,0.932890417,1.377012035,2.079494856,0.980139671,0.871068579,-0.907349351,-0.499906811,-0.570766721,-1.099318525,…
GO Process	GO:0006325	Chromatin organization	46	308	3.98393	bottom	1.87e-08	ks	STRG0A56FBJ.g10730.t1,STRG0A56FBJ.g11369.t1,STRG0A56FBJ.g11926.t1,STRG0A56FBJ.g12575.t1,STRG0A56FBJ.g12928.t1,STRG0A56FBJ.g13279.t1,STRG0A56FBJ.g13480.t1,STRG0A56FBJ.g13705.t1,STRG0A56FBJ.g13823.t1,STRG0A56FBJ.g14053.t1,STRG0A56FBJ.g14143.t1,STRG0A56FBJ.g14405.t1,STRG0A56FBJ.g15039.t1,STRG0A56FBJ.g16459.t1,STRG0A56FBJ.g16703.t1,STRG0A56FBJ.g2291.t1,STRG0A56FBJ.g2489.t1,STRG0A56FBJ.g3271.t1,STRG0A…	g10730.t1,g11369.t1,g11926.t1,g12575.t1,g12928.t1,g13279.t1,g13480.t1,g13705.t1,g13823.t1,g14053.t1,g14143.t1,g14405.t1,g15039.t1,g16459.t1,g16703.t1,g2291.t1,g2489.t1,g3271.t1,g3309.t1,g4246.t1,g4402.t1,g5013.t1,g5489.t1,g5995.t1,g6024.t1,g6070.t1,g6086.t1,g6147.t1,g6221.t1,g6691.t1,g6719.t1,g7268.t1,g7329.t1,g7531.t1,g7631.t1,g7975.t1,g8245.t1,g8283.t1,g8433.t1,g8648.t1,g8750.t1,g8892.t1,g8924.…	g10730.t1,g11369.t1,g11926.t1,g12575.t1,g12928.t1,g13279.t1,g13480.t1,g13705.t1,g13823.t1,g14053.t1,g14143.t1,g14405.t1,g15039.t1,g16459.t1,g16703.t1,g2291.t1,g2489.t1,g3271.t1,g3309.t1,g4246.t1,g4402.t1,g5013.t1,g5489.t1,g5995.t1,g6024.t1,g6070.t1,g6086.t1,g6147.t1,g6221.t1,g6691.t1,g6719.t1,g7268.t1,g7329.t1,g7531.t1,g7631.t1,g7975.t1,g8245.t1,g8283.t1,g8433.t1,g8648.t1,g8750.t1,g8892.t1,g8924.…	1.64457019,1.07180322,1.048116873,2.645434198,1.400562672,2.9608896,1.083975433,0.797574806,1.181457299,1.403403191,1.249711279,1.002378107,1.39339247,1.475077877,1.854164198,1.180377591,1.593126435,2.204611404,0.769002692,1.224059053,1.116413454,1.809277871,2.66807874,0.728730283,1.071841893,1.094162469,0.609275931,-1.066926708,2.150819301,1.028068556,0.913792047,1.517043867,0.902718165,1.998676…
GO Process	GO:0006457	Protein folding	55	145	3.73116	bottom	1.99e-08	ks	STRG0A56FBJ.g10309.t1,STRG0A56FBJ.g10545.t1,STRG0A56FBJ.g10555.t1,STRG0A56FBJ.g11267.t1,STRG0A56FBJ.g12301.t1,STRG0A56FBJ.g12346.t1,STRG0A56FBJ.g12514.t1,STRG0A56FBJ.g12801.t1,STRG0A56FBJ.g12899.t1,STRG0A56FBJ.g13120.t1,STRG0A56FBJ.g13649.t1,STRG0A56FBJ.g1411.t1,STRG0A56FBJ.g14265.t1,STRG0A56FBJ.g14370.t1,STRG0A56FBJ.g14397.t1,STRG0A56FBJ.g14847.t1,STRG0A56FBJ.g14987.t1,STRG0A56FBJ.g15577.t1,STRG…	g10309.t1,g10545.t1,g10555.t1,g11267.t1,g12301.t1,g12346.t1,g12514.t1,g12801.t1,g12899.t1,g13120.t1,g13649.t1,g1411.t1,g14265.t1,g14370.t1,g14397.t1,g14847.t1,g14987.t1,g15577.t1,g15649.t1,g15717.t1,g16350.t1,g16510.t1,g16536.t1,g16625.t1,g16626.t1,g16689.t1,g16879.t1,g16965.t1,g17010.t1,g1941.t1,g2500.t1,g2527.t1,g2672.t1,g3024.t1,g3346.t1,g3841.t1,g4269.t1,g4295.t1,g4326.t1,g5023.t1,g5138.t1,g5…	g10309.t1,g10545.t1,g10555.t1,g11267.t1,g12301.t1,g12346.t1,g12514.t1,g12801.t1,g12899.t1,g13120.t1,g13649.t1,g1411.t1,g14265.t1,g14370.t1,g14397.t1,g14847.t1,g14987.t1,g15577.t1,g15649.t1,g15717.t1,g16350.t1,g16510.t1,g16536.t1,g16625.t1,g16626.t1,g16689.t1,g16879.t1,g16965.t1,g17010.t1,g1941.t1,g2500.t1,g2527.t1,g2672.t1,g3024.t1,g3346.t1,g3841.t1,g4269.t1,g4295.t1,g4326.t1,g5023.t1,g5138.t1,g5…	1.24228041,1.723201784,2.525495933,0.687874324,1.446184606,-1.517932058,0.924535494,0.52463068,1.852133369,1.388589858,0.965199726,1.768671353,2.109140945,0.618484044,0.921343217,2.079494856,1.905848155,1.149860767,1.236155861,1.925691658,1.153468368,2.262894324,1.986322403,2.107518908,1.955568928,1.006856731,0.770973841,1.300638842,1.551911689,0.968109942,1.770203848,1.747312737,0.638012909,1.87…
GO Process	GO:0010604	Positive regulation of macromolecule metabolic process	189	1543	1.80154	bottom	1.99e-08	ks	STRG0A56FBJ.g10308.t1,STRG0A56FBJ.g10334.t1,STRG0A56FBJ.g10725.t1,STRG0A56FBJ.g10754.t1,STRG0A56FBJ.g10824.t1,STRG0A56FBJ.g109.t1,STRG0A56FBJ.g11066.t1,STRG0A56FBJ.g11151.t1,STRG0A56FBJ.g11285.t1,STRG0A56FBJ.g11360.t1,STRG0A56FBJ.g11369.t1,STRG0A56FBJ.g11450.t1,STRG0A56FBJ.g11694.t1,STRG0A56FBJ.g11763.t1,STRG0A56FBJ.g11776.t1,STRG0A56FBJ.g11879.t1,STRG0A56FBJ.g11953.t1,STRG0A56FBJ.g1206.t1,STRG0A…	g10308.t1,g10334.t1,g10725.t1,g10754.t1,g10824.t1,g109.t1,g11066.t1,g11151.t1,g11285.t1,g11360.t1,g11369.t1,g11450.t1,g11694.t1,g11763.t1,g11776.t1,g11879.t1,g11953.t1,g1206.t1,g12187.t1,g1221.t1,g12282.t1,g12296.t1,g12448.t1,g12513.t1,g12575.t1,g12837.t1,g12917.t1,g13035.t1,g13050.t1,g13053.t1,g13120.t1,g13247.t1,g13250.t1,g13267.t1,g13390.t1,g13406.t1,g13415.t1,g13420.t1,g13705.t1,g1380.t1,g141…	g10308.t1,g10334.t1,g10725.t1,g10754.t1,g10824.t1,g109.t1,g11066.t1,g11151.t1,g11285.t1,g11360.t1,g11369.t1,g11450.t1,g11694.t1,g11763.t1,g11776.t1,g11879.t1,g11953.t1,g1206.t1,g12187.t1,g1221.t1,g12282.t1,g12296.t1,g12448.t1,g12513.t1,g12575.t1,g12837.t1,g12917.t1,g13035.t1,g13050.t1,g13053.t1,g13120.t1,g13247.t1,g13250.t1,g13267.t1,g13390.t1,g13406.t1,g13415.t1,g13420.t1,g13705.t1,g1380.t1,g141…	1.978994003,0.980851571,1.219714482,1.186857663,3.076915162,0.979392542,-1.083271327,0.667149877,0.772037949,-1.036951642,1.07180322,1.250435787,-1.220134787,0.951959336,1.470531856,0.886978057,1.345128774,0.896245211,1.274768331,-1.73683163,1.11437724,0.987723101,-1.269301867,0.728606639,2.645434198,1.198708879,1.126151849,1.345176512,0.965357409,0.93934618,1.388589858,-0.962807666,1.420357293,0…
GO Process	GO:0031324	Negative regulation of cellular metabolic process	103	772	2.33383	bottom	2.04e-08	ks	STRG0A56FBJ.g10334.t1,STRG0A56FBJ.g10767.t1,STRG0A56FBJ.g109.t1,STRG0A56FBJ.g10978.t1,STRG0A56FBJ.g11151.t1,STRG0A56FBJ.g11285.t1,STRG0A56FBJ.g11431.t1,STRG0A56FBJ.g11626.t1,STRG0A56FBJ.g1165.t1,STRG0A56FBJ.g11879.t1,STRG0A56FBJ.g11953.t1,STRG0A56FBJ.g11987.t1,STRG0A56FBJ.g12120.t1,STRG0A56FBJ.g12837.t1,STRG0A56FBJ.g12914.t1,STRG0A56FBJ.g12948.t1,STRG0A56FBJ.g12958.t1,STRG0A56FBJ.g13047.t1,STRG0A…	g10334.t1,g10767.t1,g109.t1,g10978.t1,g11151.t1,g11285.t1,g11431.t1,g11626.t1,g1165.t1,g11879.t1,g11953.t1,g11987.t1,g12120.t1,g12837.t1,g12914.t1,g12948.t1,g12958.t1,g13047.t1,g13250.t1,g13260.t1,g13267.t1,g13300.t1,g13436.t1,g13705.t1,g14118.t1,g14160.t1,g14268.t1,g1441.t1,g1495.t1,g1496.t1,g14992.t1,g15033.t1,g15039.t1,g15227.t1,g15242.t1,g15326.t1,g1559.t1,g15871.t1,g16382.t1,g16456.t1,g16595…	g10334.t1,g10767.t1,g109.t1,g10978.t1,g11151.t1,g11285.t1,g11431.t1,g11626.t1,g1165.t1,g11879.t1,g11953.t1,g11987.t1,g12120.t1,g12837.t1,g12914.t1,g12948.t1,g12958.t1,g13047.t1,g13250.t1,g13260.t1,g13267.t1,g13300.t1,g13436.t1,g13705.t1,g14118.t1,g14160.t1,g14268.t1,g1441.t1,g1495.t1,g1496.t1,g14992.t1,g15033.t1,g15039.t1,g15227.t1,g15242.t1,g15326.t1,g1559.t1,g15871.t1,g16382.t1,g16456.t1,g16595…	0.980851571,-1.728501851,0.979392542,-1.79462914,0.667149877,0.772037949,1.33275789,1.323694824,1.607019364,0.886978057,1.345128774,-1.357705498,-0.771826468,1.198708879,1.186783884,-1.69738072,1.163260983,0.884097717,1.420357293,1.535837816,0.866781681,-1.878272315,0.822029766,0.797574806,1.072258989,1.410958354,1.171657699,1.377012035,-2.768579105,-2.318726146,0.980139671,1.162423469,1.39339247…
GO Process	GO:0006413	Translational initiation	30	59	3.84365	bottom	2.72e-08	ks	STRG0A56FBJ.g1065.t1,STRG0A56FBJ.g10878.t1,STRG0A56FBJ.g11765.t1,STRG0A56FBJ.g12914.t1,STRG0A56FBJ.g13415.t1,STRG0A56FBJ.g14342.t1,STRG0A56FBJ.g1472.t1,STRG0A56FBJ.g16236.t1,STRG0A56FBJ.g16407.t1,STRG0A56FBJ.g16501.t1,STRG0A56FBJ.g16786.t1,STRG0A56FBJ.g16921.t1,STRG0A56FBJ.g16953.t1,STRG0A56FBJ.g2023.t1,STRG0A56FBJ.g2430.t1,STRG0A56FBJ.g2542.t1,STRG0A56FBJ.g2844.t1,STRG0A56FBJ.g3124.t1,STRG0A56FB…	g1065.t1,g10878.t1,g11765.t1,g12914.t1,g13415.t1,g14342.t1,g1472.t1,g16236.t1,g16407.t1,g16501.t1,g16786.t1,g16921.t1,g16953.t1,g2023.t1,g2430.t1,g2542.t1,g2844.t1,g3124.t1,g3646.t1,g4163.t1,g4280.t1,g5248.t1,g5249.t1,g5990.t1,g6314.t1,g6642.t1,g7859.t1,g8379.t1,g8394.t1,g8948.t1	g1065.t1,g10878.t1,g11765.t1,g12914.t1,g13415.t1,g14342.t1,g1472.t1,g16236.t1,g16407.t1,g16501.t1,g16786.t1,g16921.t1,g16953.t1,g2023.t1,g2430.t1,g2542.t1,g2844.t1,g3124.t1,g3646.t1,g4163.t1,g4280.t1,g5248.t1,g5249.t1,g5990.t1,g6314.t1,g6642.t1,g7859.t1,g8379.t1,g8394.t1,g8948.t1	1.892385441,1.209600662,1.127115123,1.186783884,1.223800632,1.398157082,1.267105688,1.34917892,1.823552318,1.03137856,1.140496005,1.124474133,1.378645564,1.334102159,1.487165134,0.947145543,1.603193747,1.490712222,1.298419329,1.007511204,1.569831294,0.935043448,1.195311406,0.664857581,1.154708524,1.022451237,1.091668796,1.644331734,0.920838004,1.132118898
GO Process	GO:0010558	Negative regulation of macromolecule biosynthetic process	62	504	3.00362	bottom	2.72e-08	ks	STRG0A56FBJ.g109.t1,STRG0A56FBJ.g11151.t1,STRG0A56FBJ.g11285.t1,STRG0A56FBJ.g11431.t1,STRG0A56FBJ.g11626.t1,STRG0A56FBJ.g1165.t1,STRG0A56FBJ.g11879.t1,STRG0A56FBJ.g12914.t1,STRG0A56FBJ.g12958.t1,STRG0A56FBJ.g13250.t1,STRG0A56FBJ.g13260.t1,STRG0A56FBJ.g13705.t1,STRG0A56FBJ.g14118.t1,STRG0A56FBJ.g14160.t1,STRG0A56FBJ.g14268.t1,STRG0A56FBJ.g1441.t1,STRG0A56FBJ.g1495.t1,STRG0A56FBJ.g1496.t1,STRG0A56F…	g109.t1,g11151.t1,g11285.t1,g11431.t1,g11626.t1,g1165.t1,g11879.t1,g12914.t1,g12958.t1,g13250.t1,g13260.t1,g13705.t1,g14118.t1,g14160.t1,g14268.t1,g1441.t1,g1495.t1,g1496.t1,g15033.t1,g15039.t1,g15242.t1,g15326.t1,g16382.t1,g16595.t1,g16664.t1,g16703.t1,g16882.t1,g1838.t1,g2175.t1,g2311.t1,g2489.t1,g2527.t1,g2667.t1,g2933.t1,g3152.t1,g3781.t1,g3886.t1,g4505.t1,g5088.t1,g5137.t1,g5200.t1,g5710.t1,…	g109.t1,g11151.t1,g11285.t1,g11431.t1,g11626.t1,g1165.t1,g11879.t1,g12914.t1,g12958.t1,g13250.t1,g13260.t1,g13705.t1,g14118.t1,g14160.t1,g14268.t1,g1441.t1,g1495.t1,g1496.t1,g15033.t1,g15039.t1,g15242.t1,g15326.t1,g16382.t1,g16595.t1,g16664.t1,g16703.t1,g16882.t1,g1838.t1,g2175.t1,g2311.t1,g2489.t1,g2527.t1,g2667.t1,g2933.t1,g3152.t1,g3781.t1,g3886.t1,g4505.t1,g5088.t1,g5137.t1,g5200.t1,g5710.t1,…	0.979392542,0.667149877,0.772037949,1.33275789,1.323694824,1.607019364,0.886978057,1.186783884,1.163260983,1.420357293,1.535837816,0.797574806,1.072258989,1.410958354,1.171657699,1.377012035,-2.768579105,-2.318726146,1.162423469,1.39339247,1.836469269,0.839474537,1.959919797,0.729218637,-2.180683348,1.854164198,0.899961293,0.809721044,0.942603195,1.591407605,1.593126435,1.747312737,1.247370659,1.…
GO Process	GO:0051173	Positive regulation of nitrogen compound metabolic process	173	1379	1.83983	bottom	2.72e-08	ks	STRG0A56FBJ.g10334.t1,STRG0A56FBJ.g10725.t1,STRG0A56FBJ.g10754.t1,STRG0A56FBJ.g10824.t1,STRG0A56FBJ.g109.t1,STRG0A56FBJ.g11066.t1,STRG0A56FBJ.g11151.t1,STRG0A56FBJ.g11285.t1,STRG0A56FBJ.g11360.t1,STRG0A56FBJ.g11369.t1,STRG0A56FBJ.g11450.t1,STRG0A56FBJ.g11763.t1,STRG0A56FBJ.g11776.t1,STRG0A56FBJ.g11879.t1,STRG0A56FBJ.g1206.t1,STRG0A56FBJ.g12187.t1,STRG0A56FBJ.g1221.t1,STRG0A56FBJ.g12282.t1,STRG0A5…	g10334.t1,g10725.t1,g10754.t1,g10824.t1,g109.t1,g11066.t1,g11151.t1,g11285.t1,g11360.t1,g11369.t1,g11450.t1,g11763.t1,g11776.t1,g11879.t1,g1206.t1,g12187.t1,g1221.t1,g12282.t1,g12296.t1,g12448.t1,g12513.t1,g12575.t1,g12837.t1,g13035.t1,g13053.t1,g13247.t1,g13250.t1,g13267.t1,g13390.t1,g13406.t1,g13415.t1,g13705.t1,g1380.t1,g14118.t1,g14143.t1,g14265.t1,g14268.t1,g14346.t1,g1441.t1,g14847.t1,g1495…	g10334.t1,g10725.t1,g10754.t1,g10824.t1,g109.t1,g11066.t1,g11151.t1,g11285.t1,g11360.t1,g11369.t1,g11450.t1,g11763.t1,g11776.t1,g11879.t1,g1206.t1,g12187.t1,g1221.t1,g12282.t1,g12296.t1,g12448.t1,g12513.t1,g12575.t1,g12837.t1,g13035.t1,g13053.t1,g13247.t1,g13250.t1,g13267.t1,g13390.t1,g13406.t1,g13415.t1,g13705.t1,g1380.t1,g14118.t1,g14143.t1,g14265.t1,g14268.t1,g14346.t1,g1441.t1,g14847.t1,g1495…	0.980851571,1.219714482,1.186857663,3.076915162,0.979392542,-1.083271327,0.667149877,0.772037949,-1.036951642,1.07180322,1.250435787,0.951959336,1.470531856,0.886978057,0.896245211,1.274768331,-1.73683163,1.11437724,0.987723101,-1.269301867,0.728606639,2.645434198,1.198708879,1.345176512,0.93934618,-0.962807666,1.420357293,0.866781681,-0.56891928,-0.508839995,1.223800632,0.797574806,-1.060474227,…
GO Process	GO:0031325	Positive regulation of cellular metabolic process	158	1334	1.91938	bottom	3.76e-08	ks	STRG0A56FBJ.g10334.t1,STRG0A56FBJ.g10725.t1,STRG0A56FBJ.g10824.t1,STRG0A56FBJ.g109.t1,STRG0A56FBJ.g11066.t1,STRG0A56FBJ.g11151.t1,STRG0A56FBJ.g11285.t1,STRG0A56FBJ.g11369.t1,STRG0A56FBJ.g11450.t1,STRG0A56FBJ.g11763.t1,STRG0A56FBJ.g11776.t1,STRG0A56FBJ.g11879.t1,STRG0A56FBJ.g11987.t1,STRG0A56FBJ.g1206.t1,STRG0A56FBJ.g12187.t1,STRG0A56FBJ.g12282.t1,STRG0A56FBJ.g12448.t1,STRG0A56FBJ.g12513.t1,STRG0A…	g10334.t1,g10725.t1,g10824.t1,g109.t1,g11066.t1,g11151.t1,g11285.t1,g11369.t1,g11450.t1,g11763.t1,g11776.t1,g11879.t1,g11987.t1,g1206.t1,g12187.t1,g12282.t1,g12448.t1,g12513.t1,g12575.t1,g12837.t1,g12948.t1,g13035.t1,g13053.t1,g13247.t1,g13250.t1,g13267.t1,g13390.t1,g13406.t1,g13415.t1,g13705.t1,g14118.t1,g14143.t1,g14265.t1,g14268.t1,g14346.t1,g1441.t1,g14847.t1,g14992.t1,g14993.t1,g15033.t1,g15…	g10334.t1,g10725.t1,g10824.t1,g109.t1,g11066.t1,g11151.t1,g11285.t1,g11369.t1,g11450.t1,g11763.t1,g11776.t1,g11879.t1,g11987.t1,g1206.t1,g12187.t1,g12282.t1,g12448.t1,g12513.t1,g12575.t1,g12837.t1,g12948.t1,g13035.t1,g13053.t1,g13247.t1,g13250.t1,g13267.t1,g13390.t1,g13406.t1,g13415.t1,g13705.t1,g14118.t1,g14143.t1,g14265.t1,g14268.t1,g14346.t1,g1441.t1,g14847.t1,g14992.t1,g14993.t1,g15033.t1,g15…	0.980851571,1.219714482,3.076915162,0.979392542,-1.083271327,0.667149877,0.772037949,1.07180322,1.250435787,0.951959336,1.470531856,0.886978057,-1.357705498,0.896245211,1.274768331,1.11437724,-1.269301867,0.728606639,2.645434198,1.198708879,-1.69738072,1.345176512,0.93934618,-0.962807666,1.420357293,0.866781681,-0.56891928,-0.508839995,1.223800632,0.797574806,1.072258989,1.249711279,2.109140945,1…
GO Process	GO:0003341	Cilium movement	53	138	2.65505	top	3.8e-08	ks	STRG0A56FBJ.g10758.t1,STRG0A56FBJ.g10846.t1,STRG0A56FBJ.g10917.t1,STRG0A56FBJ.g10924.t1,STRG0A56FBJ.g1107.t1,STRG0A56FBJ.g11123.t1,STRG0A56FBJ.g11192.t1,STRG0A56FBJ.g11427.t1,STRG0A56FBJ.g1163.t1,STRG0A56FBJ.g11669.t1,STRG0A56FBJ.g11838.t1,STRG0A56FBJ.g11914.t1,STRG0A56FBJ.g13937.t1,STRG0A56FBJ.g14096.t1,STRG0A56FBJ.g14407.t1,STRG0A56FBJ.g14418.t1,STRG0A56FBJ.g14423.t1,STRG0A56FBJ.g14497.t1,STRG0…	g10758.t1,g10846.t1,g10917.t1,g10924.t1,g1107.t1,g11123.t1,g11192.t1,g11427.t1,g1163.t1,g11669.t1,g11838.t1,g11914.t1,g13937.t1,g14096.t1,g14407.t1,g14418.t1,g14423.t1,g14497.t1,g14903.t1,g15148.t1,g15613.t1,g15901.t1,g15997.t1,g16005.t1,g16923.t1,g1936.t1,g3494.t1,g3615.t1,g3729.t1,g4084.t1,g4109.t1,g4127.t1,g4477.t1,g4478.t1,g4721.t1,g4791.t1,g5092.t1,g5169.t1,g5208.t1,g5374.t1,g5404.t1,g5431.t…	g10758.t1,g10846.t1,g10917.t1,g10924.t1,g1107.t1,g11123.t1,g11192.t1,g11427.t1,g1163.t1,g11669.t1,g11838.t1,g11914.t1,g13937.t1,g14096.t1,g14407.t1,g14418.t1,g14423.t1,g14497.t1,g14903.t1,g15148.t1,g15613.t1,g15901.t1,g15997.t1,g16005.t1,g16923.t1,g1936.t1,g3494.t1,g3615.t1,g3729.t1,g4084.t1,g4109.t1,g4127.t1,g4477.t1,g4478.t1,g4721.t1,g4791.t1,g5092.t1,g5169.t1,g5208.t1,g5374.t1,g5404.t1,g5431.t…	-1.275611172,-1.738312781,-2.043393813,-1.822056587,-1.290666174,-1.699788862,-1.459083788,-1.548932509,-3.157142953,-2.031043502,0.904655247,-1.526120692,-1.214489932,-0.934510256,-4.29407144,-1.9227885,-1.211608658,-0.679914888,-0.729194633,-1.73002743,-1.657614944,-1.132956181,-1.763957211,-0.945953705,1.452528103,-1.798760085,-2.024438995,-2.185771866,-0.938955922,-1.541141546,0.855078437,-2.…
GO Process	GO:0010605	Negative regulation of macromolecule metabolic process	145	1135	2.14068	bottom	4.46e-08	ks	STRG0A56FBJ.g10334.t1,STRG0A56FBJ.g10364.t1,STRG0A56FBJ.g109.t1,STRG0A56FBJ.g10978.t1,STRG0A56FBJ.g11151.t1,STRG0A56FBJ.g11285.t1,STRG0A56FBJ.g11431.t1,STRG0A56FBJ.g11626.t1,STRG0A56FBJ.g1165.t1,STRG0A56FBJ.g11879.t1,STRG0A56FBJ.g11926.t1,STRG0A56FBJ.g11953.t1,STRG0A56FBJ.g11987.t1,STRG0A56FBJ.g12120.t1,STRG0A56FBJ.g12552.t1,STRG0A56FBJ.g12779.t1,STRG0A56FBJ.g12904.t1,STRG0A56FBJ.g12914.t1,STRG0A…	g10334.t1,g10364.t1,g109.t1,g10978.t1,g11151.t1,g11285.t1,g11431.t1,g11626.t1,g1165.t1,g11879.t1,g11926.t1,g11953.t1,g11987.t1,g12120.t1,g12552.t1,g12779.t1,g12904.t1,g12914.t1,g12948.t1,g12958.t1,g13047.t1,g13250.t1,g13260.t1,g13267.t1,g13279.t1,g13300.t1,g13520.t1,g13530.t1,g13705.t1,g13806.t1,g13929.t1,g14118.t1,g14125.t1,g14160.t1,g14163.t1,g14243.t1,g14268.t1,g1441.t1,g14471.t1,g1495.t1,g149…	g10334.t1,g10364.t1,g109.t1,g10978.t1,g11151.t1,g11285.t1,g11431.t1,g11626.t1,g1165.t1,g11879.t1,g11926.t1,g11953.t1,g11987.t1,g12120.t1,g12552.t1,g12779.t1,g12904.t1,g12914.t1,g12948.t1,g12958.t1,g13047.t1,g13250.t1,g13260.t1,g13267.t1,g13279.t1,g13300.t1,g13520.t1,g13530.t1,g13705.t1,g13806.t1,g13929.t1,g14118.t1,g14125.t1,g14160.t1,g14163.t1,g14243.t1,g14268.t1,g1441.t1,g14471.t1,g1495.t1,g149…	0.980851571,-1.022479236,0.979392542,-1.79462914,0.667149877,0.772037949,1.33275789,1.323694824,1.607019364,0.886978057,1.048116873,1.345128774,-1.357705498,-0.771826468,0.570731486,1.60224546,1.154561674,1.186783884,-1.69738072,1.163260983,0.884097717,1.420357293,1.535837816,0.866781681,2.9608896,-1.878272315,-1.990783056,-1.193014371,0.797574806,0.741590607,1.370464581,1.072258989,3.057315031,1…
GO Process	GO:0031327	Negative regulation of cellular biosynthetic process	64	517	2.89416	bottom	4.46e-08	ks	STRG0A56FBJ.g109.t1,STRG0A56FBJ.g11151.t1,STRG0A56FBJ.g11285.t1,STRG0A56FBJ.g11431.t1,STRG0A56FBJ.g11626.t1,STRG0A56FBJ.g1165.t1,STRG0A56FBJ.g11879.t1,STRG0A56FBJ.g12837.t1,STRG0A56FBJ.g12914.t1,STRG0A56FBJ.g12958.t1,STRG0A56FBJ.g13250.t1,STRG0A56FBJ.g13260.t1,STRG0A56FBJ.g13705.t1,STRG0A56FBJ.g14118.t1,STRG0A56FBJ.g14160.t1,STRG0A56FBJ.g14268.t1,STRG0A56FBJ.g1441.t1,STRG0A56FBJ.g1495.t1,STRG0A56…	g109.t1,g11151.t1,g11285.t1,g11431.t1,g11626.t1,g1165.t1,g11879.t1,g12837.t1,g12914.t1,g12958.t1,g13250.t1,g13260.t1,g13705.t1,g14118.t1,g14160.t1,g14268.t1,g1441.t1,g1495.t1,g1496.t1,g15033.t1,g15039.t1,g15242.t1,g15326.t1,g16382.t1,g16456.t1,g16595.t1,g16664.t1,g16703.t1,g16882.t1,g1838.t1,g2175.t1,g2311.t1,g2489.t1,g2527.t1,g2667.t1,g2933.t1,g3152.t1,g3781.t1,g3886.t1,g4505.t1,g5088.t1,g5137.t…	g109.t1,g11151.t1,g11285.t1,g11431.t1,g11626.t1,g1165.t1,g11879.t1,g12837.t1,g12914.t1,g12958.t1,g13250.t1,g13260.t1,g13705.t1,g14118.t1,g14160.t1,g14268.t1,g1441.t1,g1495.t1,g1496.t1,g15033.t1,g15039.t1,g15242.t1,g15326.t1,g16382.t1,g16456.t1,g16595.t1,g16664.t1,g16703.t1,g16882.t1,g1838.t1,g2175.t1,g2311.t1,g2489.t1,g2527.t1,g2667.t1,g2933.t1,g3152.t1,g3781.t1,g3886.t1,g4505.t1,g5088.t1,g5137.t…	0.979392542,0.667149877,0.772037949,1.33275789,1.323694824,1.607019364,0.886978057,1.198708879,1.186783884,1.163260983,1.420357293,1.535837816,0.797574806,1.072258989,1.410958354,1.171657699,1.377012035,-2.768579105,-2.318726146,1.162423469,1.39339247,1.836469269,0.839474537,1.959919797,-0.536542184,0.729218637,-2.180683348,1.854164198,0.899961293,0.809721044,0.942603195,1.591407605,1.593126435,1…
GO Process	GO:0006403	RNA localization	41	120	3.96445	bottom	5.19e-08	ks	STRG0A56FBJ.g10039.t1,STRG0A56FBJ.g11449.t1,STRG0A56FBJ.g11953.t1,STRG0A56FBJ.g12575.t1,STRG0A56FBJ.g12610.t1,STRG0A56FBJ.g12779.t1,STRG0A56FBJ.g14143.t1,STRG0A56FBJ.g14357.t1,STRG0A56FBJ.g14678.t1,STRG0A56FBJ.g14847.t1,STRG0A56FBJ.g1520.t1,STRG0A56FBJ.g15228.t1,STRG0A56FBJ.g15473.t1,STRG0A56FBJ.g155.t1,STRG0A56FBJ.g16042.t1,STRG0A56FBJ.g16316.t1,STRG0A56FBJ.g16625.t1,STRG0A56FBJ.g2302.t1,STRG0A5…	g10039.t1,g11449.t1,g11953.t1,g12575.t1,g12610.t1,g12779.t1,g14143.t1,g14357.t1,g14678.t1,g14847.t1,g1520.t1,g15228.t1,g15473.t1,g155.t1,g16042.t1,g16316.t1,g16625.t1,g2302.t1,g2502.t1,g3026.t1,g3585.t1,g486.t1,g5135.t1,g5145.t1,g5301.t1,g5753.t1,g5804.t1,g5836.t1,g6070.t1,g7320.t1,g7492.t1,g7668.t1,g7945.t1,g7993.t1,g8112.t1,g8189.t1,g8572.t1,g8899.t1,g8899.t2,g9847.t1,g9954.t1	g10039.t1,g11449.t1,g11953.t1,g12575.t1,g12610.t1,g12779.t1,g14143.t1,g14357.t1,g14678.t1,g14847.t1,g1520.t1,g15228.t1,g15473.t1,g155.t1,g16042.t1,g16316.t1,g16625.t1,g2302.t1,g2502.t1,g3026.t1,g3585.t1,g486.t1,g5135.t1,g5145.t1,g5301.t1,g5753.t1,g5804.t1,g5836.t1,g6070.t1,g7320.t1,g7492.t1,g7668.t1,g7945.t1,g7993.t1,g8112.t1,g8189.t1,g8572.t1,g8899.t1,g8899.t2,g9847.t1,g9954.t1	1.010755651,0.775495539,1.345128774,2.645434198,1.034527498,1.60224546,1.249711279,-1.144543544,1.282589578,2.079494856,0.995120911,1.132724558,0.83304777,1.300966725,0.776000669,2.711360689,2.107518908,1.238412198,1.396302797,0.95385127,2.425886827,0.687849045,1.08546447,2.01513142,2.271744918,2.174315398,1.039496532,1.000989757,1.094162469,1.049031779,0.665511061,0.820459674,1.039408544,1.86497…
GO Process	GO:0031328	Positive regulation of cellular biosynthetic process	106	787	2.29493	bottom	8.23e-08	ks	STRG0A56FBJ.g10334.t1,STRG0A56FBJ.g10725.t1,STRG0A56FBJ.g109.t1,STRG0A56FBJ.g11151.t1,STRG0A56FBJ.g11369.t1,STRG0A56FBJ.g11450.t1,STRG0A56FBJ.g11763.t1,STRG0A56FBJ.g11776.t1,STRG0A56FBJ.g11879.t1,STRG0A56FBJ.g11987.t1,STRG0A56FBJ.g1206.t1,STRG0A56FBJ.g12187.t1,STRG0A56FBJ.g12282.t1,STRG0A56FBJ.g12513.t1,STRG0A56FBJ.g12575.t1,STRG0A56FBJ.g12837.t1,STRG0A56FBJ.g12948.t1,STRG0A56FBJ.g13247.t1,STRG0A…	g10334.t1,g10725.t1,g109.t1,g11151.t1,g11369.t1,g11450.t1,g11763.t1,g11776.t1,g11879.t1,g11987.t1,g1206.t1,g12187.t1,g12282.t1,g12513.t1,g12575.t1,g12837.t1,g12948.t1,g13247.t1,g13250.t1,g13267.t1,g13390.t1,g13415.t1,g13705.t1,g14143.t1,g14265.t1,g14268.t1,g14346.t1,g1441.t1,g14847.t1,g14992.t1,g14993.t1,g15058.t1,g15777.t1,g15778.t1,g15821.t1,g15828.t1,g15904.t1,g1613.t1,g16510.t1,g16595.t1,g166…	g10334.t1,g10725.t1,g109.t1,g11151.t1,g11369.t1,g11450.t1,g11763.t1,g11776.t1,g11879.t1,g11987.t1,g1206.t1,g12187.t1,g12282.t1,g12513.t1,g12575.t1,g12837.t1,g12948.t1,g13247.t1,g13250.t1,g13267.t1,g13390.t1,g13415.t1,g13705.t1,g14143.t1,g14265.t1,g14268.t1,g14346.t1,g1441.t1,g14847.t1,g14992.t1,g14993.t1,g15058.t1,g15777.t1,g15778.t1,g15821.t1,g15828.t1,g15904.t1,g1613.t1,g16510.t1,g16595.t1,g166…	0.980851571,1.219714482,0.979392542,0.667149877,1.07180322,1.250435787,0.951959336,1.470531856,0.886978057,-1.357705498,0.896245211,1.274768331,1.11437724,0.728606639,2.645434198,1.198708879,-1.69738072,-0.962807666,1.420357293,0.866781681,-0.56891928,1.223800632,0.797574806,1.249711279,2.109140945,1.171657699,0.932890417,1.377012035,2.079494856,0.980139671,0.871068579,-0.907349351,-0.499906811,-…
GO Process	GO:0048870	Cell motility	73	387	2.11157	top	8.23e-08	ks	STRG0A56FBJ.g10260.t1,STRG0A56FBJ.g10619.t1,STRG0A56FBJ.g10846.t1,STRG0A56FBJ.g10917.t1,STRG0A56FBJ.g10924.t1,STRG0A56FBJ.g1107.t1,STRG0A56FBJ.g11151.t1,STRG0A56FBJ.g11192.t1,STRG0A56FBJ.g1163.t1,STRG0A56FBJ.g11838.t1,STRG0A56FBJ.g11987.t1,STRG0A56FBJ.g12317.t1,STRG0A56FBJ.g12346.t1,STRG0A56FBJ.g12792.t1,STRG0A56FBJ.g13233.t1,STRG0A56FBJ.g13907.t1,STRG0A56FBJ.g14096.t1,STRG0A56FBJ.g14290.t1,STRG0…	g10260.t1,g10619.t1,g10846.t1,g10917.t1,g10924.t1,g1107.t1,g11151.t1,g11192.t1,g1163.t1,g11838.t1,g11987.t1,g12317.t1,g12346.t1,g12792.t1,g13233.t1,g13907.t1,g14096.t1,g14290.t1,g14407.t1,g14418.t1,g14497.t1,g14855.t1,g14903.t1,g15258.t1,g15547.t1,g15613.t1,g15901.t1,g15997.t1,g16130.t1,g16350.t1,g16437.t1,g16923.t1,g1786.t1,g2506.t1,g2507.t1,g2510.t1,g270.t1,g2723.t1,g2963.t1,g3615.t1,g3848.t1,g…	g10260.t1,g10619.t1,g10846.t1,g10917.t1,g10924.t1,g1107.t1,g11151.t1,g11192.t1,g1163.t1,g11838.t1,g11987.t1,g12317.t1,g12346.t1,g12792.t1,g13233.t1,g13907.t1,g14096.t1,g14290.t1,g14407.t1,g14418.t1,g14497.t1,g14855.t1,g14903.t1,g15258.t1,g15547.t1,g15613.t1,g15901.t1,g15997.t1,g16130.t1,g16350.t1,g16437.t1,g16923.t1,g1786.t1,g2506.t1,g2507.t1,g2510.t1,g270.t1,g2723.t1,g2963.t1,g3615.t1,g3848.t1,g…	-1.480200386,-0.783492151,-1.738312781,-2.043393813,-1.822056587,-1.290666174,0.667149877,-1.459083788,-3.157142953,0.904655247,-1.357705498,-1.681764555,-1.517932058,-1.140978863,-0.589624411,0.998925056,-0.934510256,0.88774103,-4.29407144,-1.9227885,-0.679914888,-2.081382031,-0.729194633,-0.977000462,-1.287056064,-1.657614944,-1.132956181,-1.763957211,0.920546136,1.153468368,-1.05838029,1.45252…
GO Process	GO:0051254	Positive regulation of RNA metabolic process	96	732	2.22506	bottom	8.23e-08	ks	STRG0A56FBJ.g10334.t1,STRG0A56FBJ.g10725.t1,STRG0A56FBJ.g10824.t1,STRG0A56FBJ.g109.t1,STRG0A56FBJ.g11151.t1,STRG0A56FBJ.g11285.t1,STRG0A56FBJ.g11369.t1,STRG0A56FBJ.g11450.t1,STRG0A56FBJ.g11776.t1,STRG0A56FBJ.g11879.t1,STRG0A56FBJ.g1206.t1,STRG0A56FBJ.g12187.t1,STRG0A56FBJ.g12513.t1,STRG0A56FBJ.g12575.t1,STRG0A56FBJ.g12837.t1,STRG0A56FBJ.g13035.t1,STRG0A56FBJ.g13247.t1,STRG0A56FBJ.g13250.t1,STRG0A…	g10334.t1,g10725.t1,g10824.t1,g109.t1,g11151.t1,g11285.t1,g11369.t1,g11450.t1,g11776.t1,g11879.t1,g1206.t1,g12187.t1,g12513.t1,g12575.t1,g12837.t1,g13035.t1,g13247.t1,g13250.t1,g13267.t1,g13390.t1,g13705.t1,g14118.t1,g14143.t1,g14346.t1,g1441.t1,g14992.t1,g14993.t1,g15033.t1,g15058.t1,g15553.t1,g15777.t1,g15778.t1,g15821.t1,g15828.t1,g15904.t1,g16037.t1,g1613.t1,g16382.t1,g16595.t1,g16664.t1,g166…	g10334.t1,g10725.t1,g10824.t1,g109.t1,g11151.t1,g11285.t1,g11369.t1,g11450.t1,g11776.t1,g11879.t1,g1206.t1,g12187.t1,g12513.t1,g12575.t1,g12837.t1,g13035.t1,g13247.t1,g13250.t1,g13267.t1,g13390.t1,g13705.t1,g14118.t1,g14143.t1,g14346.t1,g1441.t1,g14992.t1,g14993.t1,g15033.t1,g15058.t1,g15553.t1,g15777.t1,g15778.t1,g15821.t1,g15828.t1,g15904.t1,g16037.t1,g1613.t1,g16382.t1,g16595.t1,g16664.t1,g166…	0.980851571,1.219714482,3.076915162,0.979392542,0.667149877,0.772037949,1.07180322,1.250435787,1.470531856,0.886978057,0.896245211,1.274768331,0.728606639,2.645434198,1.198708879,1.345176512,-0.962807666,1.420357293,0.866781681,-0.56891928,0.797574806,1.072258989,1.249711279,0.932890417,1.377012035,0.980139671,0.871068579,1.162423469,-0.907349351,0.766026895,-0.499906811,-0.570766721,-1.099318525…
GO Process	GO:0009893	Positive regulation of metabolic process	195	1670	1.67726	bottom	1.05e-07	ks	STRG0A56FBJ.g10308.t1,STRG0A56FBJ.g10334.t1,STRG0A56FBJ.g10725.t1,STRG0A56FBJ.g10754.t1,STRG0A56FBJ.g10824.t1,STRG0A56FBJ.g109.t1,STRG0A56FBJ.g11066.t1,STRG0A56FBJ.g11151.t1,STRG0A56FBJ.g11285.t1,STRG0A56FBJ.g11360.t1,STRG0A56FBJ.g11369.t1,STRG0A56FBJ.g11450.t1,STRG0A56FBJ.g11694.t1,STRG0A56FBJ.g11763.t1,STRG0A56FBJ.g11776.t1,STRG0A56FBJ.g11879.t1,STRG0A56FBJ.g11953.t1,STRG0A56FBJ.g11987.t1,STRG0…	g10308.t1,g10334.t1,g10725.t1,g10754.t1,g10824.t1,g109.t1,g11066.t1,g11151.t1,g11285.t1,g11360.t1,g11369.t1,g11450.t1,g11694.t1,g11763.t1,g11776.t1,g11879.t1,g11953.t1,g11987.t1,g1206.t1,g12187.t1,g1221.t1,g12282.t1,g12296.t1,g12448.t1,g12513.t1,g12575.t1,g12837.t1,g12917.t1,g12948.t1,g13035.t1,g13050.t1,g13053.t1,g13120.t1,g13247.t1,g13250.t1,g13267.t1,g13390.t1,g13406.t1,g13415.t1,g13420.t1,g13…	g10308.t1,g10334.t1,g10725.t1,g10754.t1,g10824.t1,g109.t1,g11066.t1,g11151.t1,g11285.t1,g11360.t1,g11369.t1,g11450.t1,g11694.t1,g11763.t1,g11776.t1,g11879.t1,g11953.t1,g11987.t1,g1206.t1,g12187.t1,g1221.t1,g12282.t1,g12296.t1,g12448.t1,g12513.t1,g12575.t1,g12837.t1,g12917.t1,g12948.t1,g13035.t1,g13050.t1,g13053.t1,g13120.t1,g13247.t1,g13250.t1,g13267.t1,g13390.t1,g13406.t1,g13415.t1,g13420.t1,g13…	1.978994003,0.980851571,1.219714482,1.186857663,3.076915162,0.979392542,-1.083271327,0.667149877,0.772037949,-1.036951642,1.07180322,1.250435787,-1.220134787,0.951959336,1.470531856,0.886978057,1.345128774,-1.357705498,0.896245211,1.274768331,-1.73683163,1.11437724,0.987723101,-1.269301867,0.728606639,2.645434198,1.198708879,1.126151849,-1.69738072,1.345176512,0.965357409,0.93934618,1.388589858,-…
GO Process	GO:0044265	Cellular macromolecule catabolic process	74	474	2.60945	bottom	1.08e-07	ks	STRG0A56FBJ.g10310.t1,STRG0A56FBJ.g11146.t1,STRG0A56FBJ.g11450.t1,STRG0A56FBJ.g12552.t1,STRG0A56FBJ.g12683.t1,STRG0A56FBJ.g12779.t1,STRG0A56FBJ.g12895.t1,STRG0A56FBJ.g12904.t1,STRG0A56FBJ.g13343.t1,STRG0A56FBJ.g13459.t1,STRG0A56FBJ.g13460.t1,STRG0A56FBJ.g13806.t1,STRG0A56FBJ.g13929.t1,STRG0A56FBJ.g1394.t1,STRG0A56FBJ.g14118.t1,STRG0A56FBJ.g14125.t1,STRG0A56FBJ.g14156.t1,STRG0A56FBJ.g14221.t1,STRG…	g10310.t1,g11146.t1,g11450.t1,g12552.t1,g12683.t1,g12779.t1,g12895.t1,g12904.t1,g13343.t1,g13459.t1,g13460.t1,g13806.t1,g13929.t1,g1394.t1,g14118.t1,g14125.t1,g14156.t1,g14221.t1,g14262.t1,g14471.t1,g14870.t1,g15033.t1,g1510.t1,g15170.t1,g1559.t1,g15900.t1,g15904.t1,g16154.t1,g16314.t1,g16330.t1,g16382.t1,g16664.t1,g16882.t1,g1804.t1,g2004.t1,g2007.t1,g2144.t1,g2886.t1,g3026.t1,g3839.t1,g4284.t1,…	g10310.t1,g11146.t1,g11450.t1,g12552.t1,g12683.t1,g12779.t1,g12895.t1,g12904.t1,g13343.t1,g13459.t1,g13460.t1,g13806.t1,g13929.t1,g1394.t1,g14118.t1,g14125.t1,g14156.t1,g14221.t1,g14262.t1,g14471.t1,g14870.t1,g15033.t1,g1510.t1,g15170.t1,g1559.t1,g15900.t1,g15904.t1,g16154.t1,g16314.t1,g16330.t1,g16382.t1,g16664.t1,g16882.t1,g1804.t1,g2004.t1,g2007.t1,g2144.t1,g2886.t1,g3026.t1,g3839.t1,g4284.t1,…	2.007165407,2.8846113,1.250435787,0.570731486,0.860301544,1.60224546,1.165233075,1.154561674,1.096775086,1.102235089,0.805829882,0.741590607,1.370464581,0.832927726,1.072258989,3.057315031,0.728040913,1.277003378,0.996871352,1.150842856,-0.619959779,1.162423469,-0.644881443,1.171518274,1.203339787,0.785747421,1.078733911,1.301316917,1.018603077,0.659019212,1.959919797,-2.180683348,0.899961293,1.1…
GO Process	GO:0010876	Lipid localization	40	220	2.87349	top	1.19e-07	ks	STRG0A56FBJ.g10978.t1,STRG0A56FBJ.g12080.t1,STRG0A56FBJ.g12096.t1,STRG0A56FBJ.g12164.t1,STRG0A56FBJ.g12170.t1,STRG0A56FBJ.g12327.t1,STRG0A56FBJ.g12333.t1,STRG0A56FBJ.g12334.t1,STRG0A56FBJ.g12948.t1,STRG0A56FBJ.g13232.t1,STRG0A56FBJ.g14281.t1,STRG0A56FBJ.g14283.t1,STRG0A56FBJ.g1479.t1,STRG0A56FBJ.g14902.t1,STRG0A56FBJ.g15562.t1,STRG0A56FBJ.g16095.t1,STRG0A56FBJ.g16095.t3,STRG0A56FBJ.g16100.t1,STRG…	g10978.t1,g12080.t1,g12096.t1,g12164.t1,g12170.t1,g12327.t1,g12333.t1,g12334.t1,g12948.t1,g13232.t1,g14281.t1,g14283.t1,g1479.t1,g14902.t1,g15562.t1,g16095.t1,g16095.t3,g16100.t1,g16251.t1,g16467.t1,g16468.t1,g2113.t1,g287.t1,g3828.t1,g3849.t1,g4117.t1,g4330.t1,g6005.t1,g6549.t1,g6737.t1,g7188.t1,g7870.t1,g8317.t1,g8541.t1,g8542.t1,g8558.t1,g8581.t1,g8582.t1,g8589.t1,g8716.t1	g10978.t1,g12080.t1,g12096.t1,g12164.t1,g12170.t1,g12327.t1,g12333.t1,g12334.t1,g12948.t1,g13232.t1,g14281.t1,g14283.t1,g1479.t1,g14902.t1,g15562.t1,g16095.t1,g16095.t3,g16100.t1,g16251.t1,g16467.t1,g16468.t1,g2113.t1,g287.t1,g3828.t1,g3849.t1,g4117.t1,g4330.t1,g6005.t1,g6549.t1,g6737.t1,g7188.t1,g7870.t1,g8317.t1,g8541.t1,g8542.t1,g8558.t1,g8581.t1,g8582.t1,g8589.t1,g8716.t1	-1.79462914,-1.983173447,-1.143696305,-2.975742936,-3.214961242,-1.734820699,-1.392196703,-2.238113402,-1.69738072,-1.600701384,-1.434318152,-0.733600441,-2.520916647,-1.444125956,-0.673759346,-1.393923504,-0.65657216,-2.530509893,-1.956691115,-1.85403163,-2.114422683,-1.202819241,-1.212351065,-1.39731617,-1.834398661,-3.421199743,-1.321481163,-1.406517986,-1.074903502,-1.82825595,-1.724264224,0.…
GO Process	GO:0006281	DNA repair	45	320	4.13101	bottom	1.39e-07	ks	STRG0A56FBJ.g10285.t1,STRG0A56FBJ.g10956.t1,STRG0A56FBJ.g11146.t1,STRG0A56FBJ.g11149.t1,STRG0A56FBJ.g11760.t1,STRG0A56FBJ.g12483.t1,STRG0A56FBJ.g12813.t1,STRG0A56FBJ.g12837.t1,STRG0A56FBJ.g12895.t1,STRG0A56FBJ.g12939.t1,STRG0A56FBJ.g13564.t1,STRG0A56FBJ.g13567.t1,STRG0A56FBJ.g14886.t1,STRG0A56FBJ.g15498.t1,STRG0A56FBJ.g16515.t1,STRG0A56FBJ.g16703.t1,STRG0A56FBJ.g16727.t1,STRG0A56FBJ.g16882.t1,STR…	g10285.t1,g10956.t1,g11146.t1,g11149.t1,g11760.t1,g12483.t1,g12813.t1,g12837.t1,g12895.t1,g12939.t1,g13564.t1,g13567.t1,g14886.t1,g15498.t1,g16515.t1,g16703.t1,g16727.t1,g16882.t1,g1737.t1,g1838.t1,g2520.t1,g2535.t1,g3823.t1,g4234.t1,g4896.t1,g5003.t1,g5013.t1,g5130.t1,g545.t1,g5758.t1,g6159.t1,g6170.t1,g6652.t1,g6691.t1,g6776.t1,g6848.t1,g7006.t1,g7055.t1,g7265.t1,g7443.t1,g8245.t1,g8257.t1,g885…	g10285.t1,g10956.t1,g11146.t1,g11149.t1,g11760.t1,g12483.t1,g12813.t1,g12837.t1,g12895.t1,g12939.t1,g13564.t1,g13567.t1,g14886.t1,g15498.t1,g16515.t1,g16703.t1,g16727.t1,g16882.t1,g1737.t1,g1838.t1,g2520.t1,g2535.t1,g3823.t1,g4234.t1,g4896.t1,g5003.t1,g5013.t1,g5130.t1,g545.t1,g5758.t1,g6159.t1,g6170.t1,g6652.t1,g6691.t1,g6776.t1,g6848.t1,g7006.t1,g7055.t1,g7265.t1,g7443.t1,g8245.t1,g8257.t1,g885…	0.726460094,1.294215006,2.8846113,-2.516745613,2.803416794,0.716963815,3.136441327,1.198708879,1.165233075,1.946426853,1.623357739,-2.400641123,0.737221712,2.583958876,3.198996552,1.854164198,0.677920055,0.899961293,1.053635861,0.809721044,0.996657562,3.100627509,2.905608074,1.003020849,1.480526783,2.572178959,1.809277871,1.177666374,-1.180299151,1.336477968,1.583158939,0.930561535,1.07669455,1.0…
GO Process	GO:0006869	Lipid transport	37	207	2.94502	top	1.45e-07	ks	STRG0A56FBJ.g10978.t1,STRG0A56FBJ.g12080.t1,STRG0A56FBJ.g12096.t1,STRG0A56FBJ.g12164.t1,STRG0A56FBJ.g12170.t1,STRG0A56FBJ.g12327.t1,STRG0A56FBJ.g12333.t1,STRG0A56FBJ.g12334.t1,STRG0A56FBJ.g12948.t1,STRG0A56FBJ.g13232.t1,STRG0A56FBJ.g14281.t1,STRG0A56FBJ.g14283.t1,STRG0A56FBJ.g1479.t1,STRG0A56FBJ.g14902.t1,STRG0A56FBJ.g15562.t1,STRG0A56FBJ.g16100.t1,STRG0A56FBJ.g16251.t1,STRG0A56FBJ.g16467.t1,STRG…	g10978.t1,g12080.t1,g12096.t1,g12164.t1,g12170.t1,g12327.t1,g12333.t1,g12334.t1,g12948.t1,g13232.t1,g14281.t1,g14283.t1,g1479.t1,g14902.t1,g15562.t1,g16100.t1,g16251.t1,g16467.t1,g16468.t1,g2113.t1,g287.t1,g3849.t1,g4117.t1,g4330.t1,g6005.t1,g6549.t1,g6737.t1,g7188.t1,g7870.t1,g8317.t1,g8541.t1,g8542.t1,g8558.t1,g8581.t1,g8582.t1,g8589.t1,g8716.t1	g10978.t1,g12080.t1,g12096.t1,g12164.t1,g12170.t1,g12327.t1,g12333.t1,g12334.t1,g12948.t1,g13232.t1,g14281.t1,g14283.t1,g1479.t1,g14902.t1,g15562.t1,g16100.t1,g16251.t1,g16467.t1,g16468.t1,g2113.t1,g287.t1,g3849.t1,g4117.t1,g4330.t1,g6005.t1,g6549.t1,g6737.t1,g7188.t1,g7870.t1,g8317.t1,g8541.t1,g8542.t1,g8558.t1,g8581.t1,g8582.t1,g8589.t1,g8716.t1	-1.79462914,-1.983173447,-1.143696305,-2.975742936,-3.214961242,-1.734820699,-1.392196703,-2.238113402,-1.69738072,-1.600701384,-1.434318152,-0.733600441,-2.520916647,-1.444125956,-0.673759346,-2.530509893,-1.956691115,-1.85403163,-2.114422683,-1.202819241,-1.212351065,-1.834398661,-3.421199743,-1.321481163,-1.406517986,-1.074903502,-1.82825595,-1.724264224,0.784003957,-1.055147684,-1.794909836,-…
GO Process	GO:0016042	Lipid catabolic process	52	217	2.37806	top	1.45e-07	ks	STRG0A56FBJ.g10290.t1,STRG0A56FBJ.g10703.t1,STRG0A56FBJ.g10964.t1,STRG0A56FBJ.g10965.t1,STRG0A56FBJ.g11126.t1,STRG0A56FBJ.g11538.t1,STRG0A56FBJ.g12333.t1,STRG0A56FBJ.g12334.t1,STRG0A56FBJ.g12540.t1,STRG0A56FBJ.g12948.t1,STRG0A56FBJ.g13168.t1,STRG0A56FBJ.g13232.t1,STRG0A56FBJ.g13677.t1,STRG0A56FBJ.g14050.t1,STRG0A56FBJ.g14120.t1,STRG0A56FBJ.g14236.t1,STRG0A56FBJ.g14406.t1,STRG0A56FBJ.g15058.t1,STR…	g10290.t1,g10703.t1,g10964.t1,g10965.t1,g11126.t1,g11538.t1,g12333.t1,g12334.t1,g12540.t1,g12948.t1,g13168.t1,g13232.t1,g13677.t1,g14050.t1,g14120.t1,g14236.t1,g14406.t1,g15058.t1,g15467.t1,g15687.t1,g15689.t1,g16095.t1,g16095.t3,g16440.t1,g16441.t1,g16461.t1,g16840.t1,g2113.t1,g2134.t1,g2342.t1,g2857.t1,g3509.t1,g3828.t1,g3854.t1,g4505.t1,g4703.t1,g4995.t1,g5348.t1,g5518.t1,g5589.t1,g6165.t1,g65…	g10290.t1,g10703.t1,g10964.t1,g10965.t1,g11126.t1,g11538.t1,g12333.t1,g12334.t1,g12540.t1,g12948.t1,g13168.t1,g13232.t1,g13677.t1,g14050.t1,g14120.t1,g14236.t1,g14406.t1,g15058.t1,g15467.t1,g15687.t1,g15689.t1,g16095.t1,g16095.t3,g16440.t1,g16441.t1,g16461.t1,g16840.t1,g2113.t1,g2134.t1,g2342.t1,g2857.t1,g3509.t1,g3828.t1,g3854.t1,g4505.t1,g4703.t1,g4995.t1,g5348.t1,g5518.t1,g5589.t1,g6165.t1,g65…	-0.769387904,-1.622559879,-1.859870046,-2.178866153,-0.871471982,-1.305824839,-1.392196703,-2.238113402,-0.954691762,-1.69738072,-1.167712946,-1.600701384,-1.725429596,-0.603196985,-1.924713712,-1.718221854,-2.519233849,-0.907349351,-0.488832176,-2.166546217,-1.268511085,-1.393923504,-0.65657216,-2.253090461,-1.936063544,-2.445508714,-1.190117235,-1.202819241,-1.535293121,-0.718571217,-1.62664408…
GO Process	GO:0009891	Positive regulation of biosynthetic process	107	803	2.25626	bottom	1.65e-07	ks	STRG0A56FBJ.g10334.t1,STRG0A56FBJ.g10725.t1,STRG0A56FBJ.g109.t1,STRG0A56FBJ.g11151.t1,STRG0A56FBJ.g11369.t1,STRG0A56FBJ.g11450.t1,STRG0A56FBJ.g11763.t1,STRG0A56FBJ.g11776.t1,STRG0A56FBJ.g11879.t1,STRG0A56FBJ.g11987.t1,STRG0A56FBJ.g1206.t1,STRG0A56FBJ.g12187.t1,STRG0A56FBJ.g12282.t1,STRG0A56FBJ.g12513.t1,STRG0A56FBJ.g12575.t1,STRG0A56FBJ.g12837.t1,STRG0A56FBJ.g12948.t1,STRG0A56FBJ.g13247.t1,STRG0A…	g10334.t1,g10725.t1,g109.t1,g11151.t1,g11369.t1,g11450.t1,g11763.t1,g11776.t1,g11879.t1,g11987.t1,g1206.t1,g12187.t1,g12282.t1,g12513.t1,g12575.t1,g12837.t1,g12948.t1,g13247.t1,g13250.t1,g13267.t1,g13390.t1,g13415.t1,g13705.t1,g14143.t1,g14265.t1,g14268.t1,g14346.t1,g1441.t1,g14847.t1,g14992.t1,g14993.t1,g15058.t1,g15777.t1,g15778.t1,g15821.t1,g15828.t1,g15904.t1,g1613.t1,g16510.t1,g16595.t1,g166…	g10334.t1,g10725.t1,g109.t1,g11151.t1,g11369.t1,g11450.t1,g11763.t1,g11776.t1,g11879.t1,g11987.t1,g1206.t1,g12187.t1,g12282.t1,g12513.t1,g12575.t1,g12837.t1,g12948.t1,g13247.t1,g13250.t1,g13267.t1,g13390.t1,g13415.t1,g13705.t1,g14143.t1,g14265.t1,g14268.t1,g14346.t1,g1441.t1,g14847.t1,g14992.t1,g14993.t1,g15058.t1,g15777.t1,g15778.t1,g15821.t1,g15828.t1,g15904.t1,g1613.t1,g16510.t1,g16595.t1,g166…	0.980851571,1.219714482,0.979392542,0.667149877,1.07180322,1.250435787,0.951959336,1.470531856,0.886978057,-1.357705498,0.896245211,1.274768331,1.11437724,0.728606639,2.645434198,1.198708879,-1.69738072,-0.962807666,1.420357293,0.866781681,-0.56891928,1.223800632,0.797574806,1.249711279,2.109140945,1.171657699,0.932890417,1.377012035,2.079494856,0.980139671,0.871068579,-0.907349351,-0.499906811,-…
GO Process	GO:0065003	Protein-containing complex assembly	148	679	2.08354	bottom	1.69e-07	ks	STRG0A56FBJ.g1043.t1,STRG0A56FBJ.g1054.t1,STRG0A56FBJ.g1054.t2,STRG0A56FBJ.g1065.t1,STRG0A56FBJ.g11123.t1,STRG0A56FBJ.g11149.t1,STRG0A56FBJ.g11192.t1,STRG0A56FBJ.g11200.t1,STRG0A56FBJ.g11375.t1,STRG0A56FBJ.g11408.t1,STRG0A56FBJ.g1163.t1,STRG0A56FBJ.g11663.t1,STRG0A56FBJ.g11669.t1,STRG0A56FBJ.g11760.t1,STRG0A56FBJ.g11765.t1,STRG0A56FBJ.g11914.t1,STRG0A56FBJ.g11947.t1,STRG0A56FBJ.g12100.t1,STRG0A56…	g1043.t1,g1054.t1,g1054.t2,g1065.t1,g11123.t1,g11149.t1,g11192.t1,g11200.t1,g11375.t1,g11408.t1,g1163.t1,g11663.t1,g11669.t1,g11760.t1,g11765.t1,g11914.t1,g11947.t1,g12100.t1,g12448.t1,g1274.t1,g12745.t1,g12958.t1,g13279.t1,g13319.t1,g13403.t1,g13480.t1,g13780.t1,g13787.t1,g13806.t1,g13973.t1,g14053.t1,g14125.t1,g14261.t1,g14262.t1,g14290.t1,g14342.t1,g14365.t1,g1472.t1,g14847.t1,g14886.t1,g15007…	g1043.t1,g1054.t1,g1054.t2,g1065.t1,g11123.t1,g11149.t1,g11192.t1,g11200.t1,g11375.t1,g11408.t1,g1163.t1,g11663.t1,g11669.t1,g11760.t1,g11765.t1,g11914.t1,g11947.t1,g12100.t1,g12448.t1,g1274.t1,g12745.t1,g12958.t1,g13279.t1,g13319.t1,g13403.t1,g13480.t1,g13780.t1,g13787.t1,g13806.t1,g13973.t1,g14053.t1,g14125.t1,g14261.t1,g14262.t1,g14290.t1,g14342.t1,g14365.t1,g1472.t1,g14847.t1,g14886.t1,g15007…	0.725458895,-1.614412262,-2.291080842,1.892385441,-1.699788862,-2.516745613,-1.459083788,0.787680476,0.900825465,1.090172389,-3.157142953,0.984807174,-2.031043502,2.803416794,1.127115123,-1.526120692,1.82203744,1.287950954,-1.269301867,0.952117724,1.98865,1.163260983,2.9608896,-1.071236335,2.214116895,1.083975433,-1.772271559,1.355900429,0.741590607,0.89763724,1.403403191,3.057315031,1.144245903,…
GO Process	GO:0051172	Negative regulation of nitrogen compound metabolic process	116	913	2.23431	bottom	1.79e-07	ks	STRG0A56FBJ.g10334.t1,STRG0A56FBJ.g10364.t1,STRG0A56FBJ.g10767.t1,STRG0A56FBJ.g109.t1,STRG0A56FBJ.g11151.t1,STRG0A56FBJ.g11285.t1,STRG0A56FBJ.g11431.t1,STRG0A56FBJ.g11626.t1,STRG0A56FBJ.g1165.t1,STRG0A56FBJ.g11879.t1,STRG0A56FBJ.g11953.t1,STRG0A56FBJ.g11987.t1,STRG0A56FBJ.g12120.t1,STRG0A56FBJ.g12552.t1,STRG0A56FBJ.g12837.t1,STRG0A56FBJ.g12914.t1,STRG0A56FBJ.g12958.t1,STRG0A56FBJ.g13047.t1,STRG0A…	g10334.t1,g10364.t1,g10767.t1,g109.t1,g11151.t1,g11285.t1,g11431.t1,g11626.t1,g1165.t1,g11879.t1,g11953.t1,g11987.t1,g12120.t1,g12552.t1,g12837.t1,g12914.t1,g12958.t1,g13047.t1,g13250.t1,g13260.t1,g13267.t1,g13300.t1,g13520.t1,g13530.t1,g13705.t1,g14118.t1,g14160.t1,g14268.t1,g1441.t1,g1495.t1,g1496.t1,g14992.t1,g15033.t1,g15039.t1,g15227.t1,g15242.t1,g15326.t1,g1559.t1,g15871.t1,g16382.t1,g16456…	g10334.t1,g10364.t1,g10767.t1,g109.t1,g11151.t1,g11285.t1,g11431.t1,g11626.t1,g1165.t1,g11879.t1,g11953.t1,g11987.t1,g12120.t1,g12552.t1,g12837.t1,g12914.t1,g12958.t1,g13047.t1,g13250.t1,g13260.t1,g13267.t1,g13300.t1,g13520.t1,g13530.t1,g13705.t1,g14118.t1,g14160.t1,g14268.t1,g1441.t1,g1495.t1,g1496.t1,g14992.t1,g15033.t1,g15039.t1,g15227.t1,g15242.t1,g15326.t1,g1559.t1,g15871.t1,g16382.t1,g16456…	0.980851571,-1.022479236,-1.728501851,0.979392542,0.667149877,0.772037949,1.33275789,1.323694824,1.607019364,0.886978057,1.345128774,-1.357705498,-0.771826468,0.570731486,1.198708879,1.186783884,1.163260983,0.884097717,1.420357293,1.535837816,0.866781681,-1.878272315,-1.990783056,-1.193014371,0.797574806,1.072258989,1.410958354,1.171657699,1.377012035,-2.768579105,-2.318726146,0.980139671,1.16242…
GO Process	GO:0009892	Negative regulation of metabolic process	155	1205	1.95849	bottom	2.45e-07	ks	STRG0A56FBJ.g10334.t1,STRG0A56FBJ.g10364.t1,STRG0A56FBJ.g10767.t1,STRG0A56FBJ.g109.t1,STRG0A56FBJ.g10978.t1,STRG0A56FBJ.g11151.t1,STRG0A56FBJ.g11285.t1,STRG0A56FBJ.g11431.t1,STRG0A56FBJ.g11626.t1,STRG0A56FBJ.g1165.t1,STRG0A56FBJ.g11879.t1,STRG0A56FBJ.g11926.t1,STRG0A56FBJ.g11953.t1,STRG0A56FBJ.g11987.t1,STRG0A56FBJ.g12120.t1,STRG0A56FBJ.g1221.t1,STRG0A56FBJ.g12552.t1,STRG0A56FBJ.g12779.t1,STRG0A5…	g10334.t1,g10364.t1,g10767.t1,g109.t1,g10978.t1,g11151.t1,g11285.t1,g11431.t1,g11626.t1,g1165.t1,g11879.t1,g11926.t1,g11953.t1,g11987.t1,g12120.t1,g1221.t1,g12552.t1,g12779.t1,g12837.t1,g12904.t1,g12914.t1,g12948.t1,g12958.t1,g13047.t1,g13232.t1,g13250.t1,g13260.t1,g13267.t1,g13279.t1,g13300.t1,g13436.t1,g13520.t1,g13530.t1,g13705.t1,g13806.t1,g13929.t1,g14118.t1,g14125.t1,g14160.t1,g14163.t1,g14…	g10334.t1,g10364.t1,g10767.t1,g109.t1,g10978.t1,g11151.t1,g11285.t1,g11431.t1,g11626.t1,g1165.t1,g11879.t1,g11926.t1,g11953.t1,g11987.t1,g12120.t1,g1221.t1,g12552.t1,g12779.t1,g12837.t1,g12904.t1,g12914.t1,g12948.t1,g12958.t1,g13047.t1,g13232.t1,g13250.t1,g13260.t1,g13267.t1,g13279.t1,g13300.t1,g13436.t1,g13520.t1,g13530.t1,g13705.t1,g13806.t1,g13929.t1,g14118.t1,g14125.t1,g14160.t1,g14163.t1,g14…	0.980851571,-1.022479236,-1.728501851,0.979392542,-1.79462914,0.667149877,0.772037949,1.33275789,1.323694824,1.607019364,0.886978057,1.048116873,1.345128774,-1.357705498,-0.771826468,-1.73683163,0.570731486,1.60224546,1.198708879,1.154561674,1.186783884,-1.69738072,1.163260983,0.884097717,-1.600701384,1.420357293,1.535837816,0.866781681,2.9608896,-1.878272315,0.822029766,-1.990783056,-1.193014371…
GO Process	GO:0009890	Negative regulation of biosynthetic process	66	522	2.71246	bottom	2.69e-07	ks	STRG0A56FBJ.g109.t1,STRG0A56FBJ.g11151.t1,STRG0A56FBJ.g11285.t1,STRG0A56FBJ.g11431.t1,STRG0A56FBJ.g11626.t1,STRG0A56FBJ.g1165.t1,STRG0A56FBJ.g11879.t1,STRG0A56FBJ.g12837.t1,STRG0A56FBJ.g12914.t1,STRG0A56FBJ.g12948.t1,STRG0A56FBJ.g12958.t1,STRG0A56FBJ.g13250.t1,STRG0A56FBJ.g13260.t1,STRG0A56FBJ.g13705.t1,STRG0A56FBJ.g14118.t1,STRG0A56FBJ.g14160.t1,STRG0A56FBJ.g14268.t1,STRG0A56FBJ.g1441.t1,STRG0A5…	g109.t1,g11151.t1,g11285.t1,g11431.t1,g11626.t1,g1165.t1,g11879.t1,g12837.t1,g12914.t1,g12948.t1,g12958.t1,g13250.t1,g13260.t1,g13705.t1,g14118.t1,g14160.t1,g14268.t1,g1441.t1,g1495.t1,g1496.t1,g15033.t1,g15039.t1,g15242.t1,g15326.t1,g16382.t1,g16456.t1,g16595.t1,g16664.t1,g16703.t1,g16882.t1,g1838.t1,g2175.t1,g2311.t1,g2489.t1,g2527.t1,g2667.t1,g2933.t1,g3152.t1,g3781.t1,g3886.t1,g4505.t1,g5088.…	g109.t1,g11151.t1,g11285.t1,g11431.t1,g11626.t1,g1165.t1,g11879.t1,g12837.t1,g12914.t1,g12948.t1,g12958.t1,g13250.t1,g13260.t1,g13705.t1,g14118.t1,g14160.t1,g14268.t1,g1441.t1,g1495.t1,g1496.t1,g15033.t1,g15039.t1,g15242.t1,g15326.t1,g16382.t1,g16456.t1,g16595.t1,g16664.t1,g16703.t1,g16882.t1,g1838.t1,g2175.t1,g2311.t1,g2489.t1,g2527.t1,g2667.t1,g2933.t1,g3152.t1,g3781.t1,g3886.t1,g4505.t1,g5088.…	0.979392542,0.667149877,0.772037949,1.33275789,1.323694824,1.607019364,0.886978057,1.198708879,1.186783884,-1.69738072,1.163260983,1.420357293,1.535837816,0.797574806,1.072258989,1.410958354,1.171657699,1.377012035,-2.768579105,-2.318726146,1.162423469,1.39339247,1.836469269,0.839474537,1.959919797,-0.536542184,0.729218637,-2.180683348,1.854164198,0.899961293,0.809721044,0.942603195,1.591407605,1…
GO Process	GO:0045934	Negative regulation of nucleobase-containing compound metabolic process	57	498	2.85736	bottom	2.73e-07	ks	STRG0A56FBJ.g10767.t1,STRG0A56FBJ.g109.t1,STRG0A56FBJ.g11151.t1,STRG0A56FBJ.g11285.t1,STRG0A56FBJ.g11431.t1,STRG0A56FBJ.g11626.t1,STRG0A56FBJ.g11879.t1,STRG0A56FBJ.g11953.t1,STRG0A56FBJ.g12837.t1,STRG0A56FBJ.g12958.t1,STRG0A56FBJ.g13047.t1,STRG0A56FBJ.g13250.t1,STRG0A56FBJ.g13705.t1,STRG0A56FBJ.g14160.t1,STRG0A56FBJ.g14268.t1,STRG0A56FBJ.g1495.t1,STRG0A56FBJ.g1496.t1,STRG0A56FBJ.g15033.t1,STRG0A5…	g10767.t1,g109.t1,g11151.t1,g11285.t1,g11431.t1,g11626.t1,g11879.t1,g11953.t1,g12837.t1,g12958.t1,g13047.t1,g13250.t1,g13705.t1,g14160.t1,g14268.t1,g1495.t1,g1496.t1,g15033.t1,g15039.t1,g15227.t1,g15242.t1,g15326.t1,g16595.t1,g16664.t1,g16703.t1,g1838.t1,g2175.t1,g2311.t1,g2489.t1,g2520.t1,g2527.t1,g2933.t1,g3125.t1,g3781.t1,g3886.t1,g4163.t1,g4505.t1,g5137.t1,g5200.t1,g5290.t1,g5301.t1,g5710.t1,…	g10767.t1,g109.t1,g11151.t1,g11285.t1,g11431.t1,g11626.t1,g11879.t1,g11953.t1,g12837.t1,g12958.t1,g13047.t1,g13250.t1,g13705.t1,g14160.t1,g14268.t1,g1495.t1,g1496.t1,g15033.t1,g15039.t1,g15227.t1,g15242.t1,g15326.t1,g16595.t1,g16664.t1,g16703.t1,g1838.t1,g2175.t1,g2311.t1,g2489.t1,g2520.t1,g2527.t1,g2933.t1,g3125.t1,g3781.t1,g3886.t1,g4163.t1,g4505.t1,g5137.t1,g5200.t1,g5290.t1,g5301.t1,g5710.t1,…	-1.728501851,0.979392542,0.667149877,0.772037949,1.33275789,1.323694824,0.886978057,1.345128774,1.198708879,1.163260983,0.884097717,1.420357293,0.797574806,1.410958354,1.171657699,-2.768579105,-2.318726146,1.162423469,1.39339247,1.825505464,1.836469269,0.839474537,0.729218637,-2.180683348,1.854164198,0.809721044,0.942603195,1.591407605,1.593126435,0.996657562,1.747312737,1.043996403,2.154903887,0…
GO Process	GO:0006974	Cellular response to DNA damage stimulus	56	443	3.57062	bottom	2.87e-07	ks	STRG0A56FBJ.g10285.t1,STRG0A56FBJ.g10956.t1,STRG0A56FBJ.g11146.t1,STRG0A56FBJ.g11149.t1,STRG0A56FBJ.g11760.t1,STRG0A56FBJ.g11879.t1,STRG0A56FBJ.g12483.t1,STRG0A56FBJ.g12813.t1,STRG0A56FBJ.g12837.t1,STRG0A56FBJ.g12895.t1,STRG0A56FBJ.g12939.t1,STRG0A56FBJ.g13267.t1,STRG0A56FBJ.g13279.t1,STRG0A56FBJ.g13564.t1,STRG0A56FBJ.g13567.t1,STRG0A56FBJ.g13683.t1,STRG0A56FBJ.g14886.t1,STRG0A56FBJ.g15498.t1,STR…	g10285.t1,g10956.t1,g11146.t1,g11149.t1,g11760.t1,g11879.t1,g12483.t1,g12813.t1,g12837.t1,g12895.t1,g12939.t1,g13267.t1,g13279.t1,g13564.t1,g13567.t1,g13683.t1,g14886.t1,g15498.t1,g16515.t1,g16703.t1,g16727.t1,g16882.t1,g1737.t1,g1838.t1,g2520.t1,g2535.t1,g2775.t1,g3508.t1,g3823.t1,g4171.t1,g4234.t1,g4896.t1,g5003.t1,g5013.t1,g5130.t1,g545.t1,g5758.t1,g6159.t1,g6170.t1,g6652.t1,g6691.t1,g6776.t1,…	g10285.t1,g10956.t1,g11146.t1,g11149.t1,g11760.t1,g11879.t1,g12483.t1,g12813.t1,g12837.t1,g12895.t1,g12939.t1,g13267.t1,g13279.t1,g13564.t1,g13567.t1,g13683.t1,g14886.t1,g15498.t1,g16515.t1,g16703.t1,g16727.t1,g16882.t1,g1737.t1,g1838.t1,g2520.t1,g2535.t1,g2775.t1,g3508.t1,g3823.t1,g4171.t1,g4234.t1,g4896.t1,g5003.t1,g5013.t1,g5130.t1,g545.t1,g5758.t1,g6159.t1,g6170.t1,g6652.t1,g6691.t1,g6776.t1,…	0.726460094,1.294215006,2.8846113,-2.516745613,2.803416794,0.886978057,0.716963815,3.136441327,1.198708879,1.165233075,1.946426853,0.866781681,2.9608896,1.623357739,-2.400641123,-0.777140521,0.737221712,2.583958876,3.198996552,1.854164198,0.677920055,0.899961293,1.053635861,0.809721044,0.996657562,3.100627509,2.311159974,-1.645874695,2.905608074,-3.345656188,1.003020849,1.480526783,2.572178959,1.…
GO Process	GO:0050658	RNA transport	37	106	3.66857	bottom	3.75e-07	ks	STRG0A56FBJ.g10039.t1,STRG0A56FBJ.g11449.t1,STRG0A56FBJ.g11953.t1,STRG0A56FBJ.g12575.t1,STRG0A56FBJ.g12610.t1,STRG0A56FBJ.g12779.t1,STRG0A56FBJ.g14143.t1,STRG0A56FBJ.g14357.t1,STRG0A56FBJ.g14678.t1,STRG0A56FBJ.g1520.t1,STRG0A56FBJ.g15228.t1,STRG0A56FBJ.g15473.t1,STRG0A56FBJ.g155.t1,STRG0A56FBJ.g16042.t1,STRG0A56FBJ.g2302.t1,STRG0A56FBJ.g2502.t1,STRG0A56FBJ.g3026.t1,STRG0A56FBJ.g3585.t1,STRG0A56FB…	g10039.t1,g11449.t1,g11953.t1,g12575.t1,g12610.t1,g12779.t1,g14143.t1,g14357.t1,g14678.t1,g1520.t1,g15228.t1,g15473.t1,g155.t1,g16042.t1,g2302.t1,g2502.t1,g3026.t1,g3585.t1,g486.t1,g5135.t1,g5145.t1,g5753.t1,g5804.t1,g5836.t1,g6070.t1,g7320.t1,g7492.t1,g7668.t1,g7945.t1,g7993.t1,g8112.t1,g8189.t1,g8572.t1,g8899.t1,g8899.t2,g9847.t1,g9954.t1	g10039.t1,g11449.t1,g11953.t1,g12575.t1,g12610.t1,g12779.t1,g14143.t1,g14357.t1,g14678.t1,g1520.t1,g15228.t1,g15473.t1,g155.t1,g16042.t1,g2302.t1,g2502.t1,g3026.t1,g3585.t1,g486.t1,g5135.t1,g5145.t1,g5753.t1,g5804.t1,g5836.t1,g6070.t1,g7320.t1,g7492.t1,g7668.t1,g7945.t1,g7993.t1,g8112.t1,g8189.t1,g8572.t1,g8899.t1,g8899.t2,g9847.t1,g9954.t1	1.010755651,0.775495539,1.345128774,2.645434198,1.034527498,1.60224546,1.249711279,-1.144543544,1.282589578,0.995120911,1.132724558,0.83304777,1.300966725,0.776000669,1.238412198,1.396302797,0.95385127,2.425886827,0.687849045,1.08546447,2.01513142,2.174315398,1.039496532,1.000989757,1.094162469,1.049031779,0.665511061,0.820459674,1.039408544,1.864979394,1.287682397,0.687377784,1.764419174,0.86673…
GO Process	GO:0036211	Protein modification process	172	1972	1.91741	bottom	4.41e-07	ks	STRG0A56FBJ.g10249.t1,STRG0A56FBJ.g10285.t1,STRG0A56FBJ.g10309.t1,STRG0A56FBJ.g10310.t1,STRG0A56FBJ.g10334.t1,STRG0A56FBJ.g10364.t1,STRG0A56FBJ.g10545.t1,STRG0A56FBJ.g10555.t1,STRG0A56FBJ.g10629.t1,STRG0A56FBJ.g1068.t1,STRG0A56FBJ.g10754.t1,STRG0A56FBJ.g10956.t1,STRG0A56FBJ.g1112.t1,STRG0A56FBJ.g11122.t1,STRG0A56FBJ.g11369.t1,STRG0A56FBJ.g11375.t1,STRG0A56FBJ.g12038.t1,STRG0A56FBJ.g12187.t1,STRG0…	g10249.t1,g10285.t1,g10309.t1,g10310.t1,g10334.t1,g10364.t1,g10545.t1,g10555.t1,g10629.t1,g1068.t1,g10754.t1,g10956.t1,g1112.t1,g11122.t1,g11369.t1,g11375.t1,g12038.t1,g12187.t1,g12346.t1,g12513.t1,g12514.t1,g12525.t1,g12558.t1,g12736.t1,g12745.t1,g12801.t1,g12837.t1,g12928.t1,g13042.t1,g13152.t1,g13267.t1,g13279.t1,g13300.t1,g13343.t1,g13406.t1,g13554.t1,g13568.t1,g13629.t1,g13649.t1,g13682.t1,g…	g10249.t1,g10285.t1,g10309.t1,g10310.t1,g10334.t1,g10364.t1,g10545.t1,g10555.t1,g10629.t1,g1068.t1,g10754.t1,g10956.t1,g1112.t1,g11122.t1,g11369.t1,g11375.t1,g12038.t1,g12187.t1,g12346.t1,g12513.t1,g12514.t1,g12525.t1,g12558.t1,g12736.t1,g12745.t1,g12801.t1,g12837.t1,g12928.t1,g13042.t1,g13152.t1,g13267.t1,g13279.t1,g13300.t1,g13343.t1,g13406.t1,g13554.t1,g13568.t1,g13629.t1,g13649.t1,g13682.t1,g…	0.963537693,0.726460094,1.24228041,2.007165407,0.980851571,-1.022479236,1.723201784,2.525495933,-1.166703032,-0.880086988,1.186857663,1.294215006,2.352524127,-1.277151728,1.07180322,0.900825465,0.907283634,1.274768331,-1.517932058,0.728606639,0.924535494,1.33218056,1.340146323,0.616468819,1.98865,0.52463068,1.198708879,1.400562672,2.741363783,1.183889374,0.866781681,2.9608896,-1.878272315,1.09677…
GO Process	GO:0043484	Regulation of RNA splicing	37	78	3.70253	bottom	5.08e-07	ks	STRG0A56FBJ.g10824.t1,STRG0A56FBJ.g11450.t1,STRG0A56FBJ.g11626.t1,STRG0A56FBJ.g11879.t1,STRG0A56FBJ.g12779.t1,STRG0A56FBJ.g12931.t1,STRG0A56FBJ.g13035.t1,STRG0A56FBJ.g13053.t1,STRG0A56FBJ.g13972.t1,STRG0A56FBJ.g14123.t1,STRG0A56FBJ.g14268.t1,STRG0A56FBJ.g15090.t1,STRG0A56FBJ.g15227.t1,STRG0A56FBJ.g15228.t1,STRG0A56FBJ.g15553.t1,STRG0A56FBJ.g15609.t1,STRG0A56FBJ.g16037.t1,STRG0A56FBJ.g16337.t1,STR…	g10824.t1,g11450.t1,g11626.t1,g11879.t1,g12779.t1,g12931.t1,g13035.t1,g13053.t1,g13972.t1,g14123.t1,g14268.t1,g15090.t1,g15227.t1,g15228.t1,g15553.t1,g15609.t1,g16037.t1,g16337.t1,g16482.t1,g16866.t1,g1923.t1,g2006.t1,g2174.t1,g2735.t1,g3585.t1,g4339.t1,g5088.t1,g5290.t1,g5836.t1,g591.t1,g6070.t1,g7980.t1,g8112.t1,g8852.t1,g9160.t1,g989.t1,g9954.t1	g10824.t1,g11450.t1,g11626.t1,g11879.t1,g12779.t1,g12931.t1,g13035.t1,g13053.t1,g13972.t1,g14123.t1,g14268.t1,g15090.t1,g15227.t1,g15228.t1,g15553.t1,g15609.t1,g16037.t1,g16337.t1,g16482.t1,g16866.t1,g1923.t1,g2006.t1,g2174.t1,g2735.t1,g3585.t1,g4339.t1,g5088.t1,g5290.t1,g5836.t1,g591.t1,g6070.t1,g7980.t1,g8112.t1,g8852.t1,g9160.t1,g989.t1,g9954.t1	3.076915162,1.250435787,1.323694824,0.886978057,1.60224546,0.812894382,1.345176512,0.93934618,0.907950028,1.488579723,1.171657699,-0.719726623,1.825505464,1.132724558,0.766026895,0.85298053,0.617361382,1.433353378,1.025867303,1.522671927,1.185504639,0.719991361,1.438168223,1.332701188,2.425886827,1.329450267,1.659652199,0.982121514,1.000989757,1.03594632,1.094162469,1.242334493,1.287682397,0.9953…
GO Process	GO:0007017	Microtubule-based process	146	589	1.49909	top	5.17e-07	ks	STRG0A56FBJ.g10314.t1,STRG0A56FBJ.g10758.t1,STRG0A56FBJ.g10846.t1,STRG0A56FBJ.g10858.t1,STRG0A56FBJ.g10917.t1,STRG0A56FBJ.g10924.t1,STRG0A56FBJ.g1107.t1,STRG0A56FBJ.g11123.t1,STRG0A56FBJ.g11192.t1,STRG0A56FBJ.g11365.t1,STRG0A56FBJ.g11427.t1,STRG0A56FBJ.g11450.t1,STRG0A56FBJ.g11489.t1,STRG0A56FBJ.g1163.t1,STRG0A56FBJ.g11669.t1,STRG0A56FBJ.g11838.t1,STRG0A56FBJ.g11914.t1,STRG0A56FBJ.g12026.t1,STRG0…	g10314.t1,g10758.t1,g10846.t1,g10858.t1,g10917.t1,g10924.t1,g1107.t1,g11123.t1,g11192.t1,g11365.t1,g11427.t1,g11450.t1,g11489.t1,g1163.t1,g11669.t1,g11838.t1,g11914.t1,g12026.t1,g12355.t1,g12402.t1,g12475.t1,g12483.t1,g1274.t1,g13061.t1,g13424.t1,g13497.t1,g13599.t1,g13683.t1,g13780.t1,g13795.t1,g13835.t1,g13937.t1,g14048.t1,g1408.t1,g14096.t1,g1411.t1,g14261.t1,g14290.t1,g14354.t1,g14407.t1,g144…	g10314.t1,g10758.t1,g10846.t1,g10858.t1,g10917.t1,g10924.t1,g1107.t1,g11123.t1,g11192.t1,g11365.t1,g11427.t1,g11450.t1,g11489.t1,g1163.t1,g11669.t1,g11838.t1,g11914.t1,g12026.t1,g12355.t1,g12402.t1,g12475.t1,g12483.t1,g1274.t1,g13061.t1,g13424.t1,g13497.t1,g13599.t1,g13683.t1,g13780.t1,g13795.t1,g13835.t1,g13937.t1,g14048.t1,g1408.t1,g14096.t1,g1411.t1,g14261.t1,g14290.t1,g14354.t1,g14407.t1,g144…	-0.611404417,-1.275611172,-1.738312781,-1.841552909,-2.043393813,-1.822056587,-1.290666174,-1.699788862,-1.459083788,1.301127155,-1.548932509,1.250435787,-1.185159978,-3.157142953,-2.031043502,0.904655247,-1.526120692,0.870119299,-1.309788907,-1.2925154,0.718685466,0.716963815,0.952117724,-0.720494618,-1.123063657,1.234002753,-2.698331529,-0.777140521,-1.772271559,1.222405846,-1.634305602,-1.2144…
GO Process	GO:0044782	Cilium organization	74	253	2.06218	top	6.12e-07	ks	STRG0A56FBJ.g10758.t1,STRG0A56FBJ.g10924.t1,STRG0A56FBJ.g1107.t1,STRG0A56FBJ.g11123.t1,STRG0A56FBJ.g11192.t1,STRG0A56FBJ.g11365.t1,STRG0A56FBJ.g11427.t1,STRG0A56FBJ.g1163.t1,STRG0A56FBJ.g11669.t1,STRG0A56FBJ.g11914.t1,STRG0A56FBJ.g1200.t1,STRG0A56FBJ.g13937.t1,STRG0A56FBJ.g14096.t1,STRG0A56FBJ.g14261.t1,STRG0A56FBJ.g14354.t1,STRG0A56FBJ.g14407.t1,STRG0A56FBJ.g14417.t1,STRG0A56FBJ.g14418.t1,STRG0A…	g10758.t1,g10924.t1,g1107.t1,g11123.t1,g11192.t1,g11365.t1,g11427.t1,g1163.t1,g11669.t1,g11914.t1,g1200.t1,g13937.t1,g14096.t1,g14261.t1,g14354.t1,g14407.t1,g14417.t1,g14418.t1,g1442.t1,g14423.t1,g14478.t1,g14497.t1,g14903.t1,g15129.t1,g15386.t1,g15901.t1,g15997.t1,g16005.t1,g16923.t1,g1936.t1,g1987.t1,g2149.t1,g2150.t1,g2150.t2,g2958.t1,g2962.t1,g2963.t1,g3015.t1,g3494.t1,g3503.t1,g3615.t1,g3729…	g10758.t1,g10924.t1,g1107.t1,g11123.t1,g11192.t1,g11365.t1,g11427.t1,g1163.t1,g11669.t1,g11914.t1,g1200.t1,g13937.t1,g14096.t1,g14261.t1,g14354.t1,g14407.t1,g14417.t1,g14418.t1,g1442.t1,g14423.t1,g14478.t1,g14497.t1,g14903.t1,g15129.t1,g15386.t1,g15901.t1,g15997.t1,g16005.t1,g16923.t1,g1936.t1,g1987.t1,g2149.t1,g2150.t1,g2150.t2,g2958.t1,g2962.t1,g2963.t1,g3015.t1,g3494.t1,g3503.t1,g3615.t1,g3729…	-1.275611172,-1.822056587,-1.290666174,-1.699788862,-1.459083788,1.301127155,-1.548932509,-3.157142953,-2.031043502,-1.526120692,-1.450673928,-1.214489932,-0.934510256,1.144245903,-1.131761386,-4.29407144,-1.983590108,-1.9227885,-0.779170172,-1.211608658,1.167173329,-0.679914888,-0.729194633,-1.493605915,0.919143652,-1.132956181,-1.763957211,-0.945953705,1.452528103,-1.798760085,-1.463184988,-1.5…
GO Process	GO:0006338	Chromatin remodeling	28	129	4.48911	bottom	6.68e-07	ks	STRG0A56FBJ.g11926.t1,STRG0A56FBJ.g12575.t1,STRG0A56FBJ.g13279.t1,STRG0A56FBJ.g13480.t1,STRG0A56FBJ.g13705.t1,STRG0A56FBJ.g14053.t1,STRG0A56FBJ.g14405.t1,STRG0A56FBJ.g15039.t1,STRG0A56FBJ.g16703.t1,STRG0A56FBJ.g2291.t1,STRG0A56FBJ.g2489.t1,STRG0A56FBJ.g3271.t1,STRG0A56FBJ.g3309.t1,STRG0A56FBJ.g4246.t1,STRG0A56FBJ.g5013.t1,STRG0A56FBJ.g6221.t1,STRG0A56FBJ.g6691.t1,STRG0A56FBJ.g6719.t1,STRG0A56FBJ.…	g11926.t1,g12575.t1,g13279.t1,g13480.t1,g13705.t1,g14053.t1,g14405.t1,g15039.t1,g16703.t1,g2291.t1,g2489.t1,g3271.t1,g3309.t1,g4246.t1,g5013.t1,g6221.t1,g6691.t1,g6719.t1,g7329.t1,g7531.t1,g8245.t1,g8283.t1,g8433.t1,g8750.t1,g8892.t1,g8924.t1,g9891.t1,g992.t1	g11926.t1,g12575.t1,g13279.t1,g13480.t1,g13705.t1,g14053.t1,g14405.t1,g15039.t1,g16703.t1,g2291.t1,g2489.t1,g3271.t1,g3309.t1,g4246.t1,g5013.t1,g6221.t1,g6691.t1,g6719.t1,g7329.t1,g7531.t1,g8245.t1,g8283.t1,g8433.t1,g8750.t1,g8892.t1,g8924.t1,g9891.t1,g992.t1	1.048116873,2.645434198,2.9608896,1.083975433,0.797574806,1.403403191,1.002378107,1.39339247,1.854164198,1.180377591,1.593126435,2.204611404,0.769002692,1.224059053,1.809277871,2.150819301,1.028068556,0.913792047,0.902718165,1.998676726,2.96905522,0.814753642,1.839087915,1.047256745,1.023290784,1.051253324,1.000935899,1.991254838
GO Process	GO:0050684	Regulation of mRNA processing	38	84	3.75683	bottom	7.87e-07	ks	STRG0A56FBJ.g10824.t1,STRG0A56FBJ.g11626.t1,STRG0A56FBJ.g11879.t1,STRG0A56FBJ.g12187.t1,STRG0A56FBJ.g12745.t1,STRG0A56FBJ.g12779.t1,STRG0A56FBJ.g12931.t1,STRG0A56FBJ.g13035.t1,STRG0A56FBJ.g14268.t1,STRG0A56FBJ.g15090.t1,STRG0A56FBJ.g15227.t1,STRG0A56FBJ.g15228.t1,STRG0A56FBJ.g15553.t1,STRG0A56FBJ.g15609.t1,STRG0A56FBJ.g16037.t1,STRG0A56FBJ.g16482.t1,STRG0A56FBJ.g16866.t1,STRG0A56FBJ.g1923.t1,STRG…	g10824.t1,g11626.t1,g11879.t1,g12187.t1,g12745.t1,g12779.t1,g12931.t1,g13035.t1,g14268.t1,g15090.t1,g15227.t1,g15228.t1,g15553.t1,g15609.t1,g16037.t1,g16482.t1,g16866.t1,g1923.t1,g2174.t1,g2735.t1,g3585.t1,g3649.t1,g3830.t1,g4339.t1,g5088.t1,g5290.t1,g5700.t1,g5836.t1,g591.t1,g6070.t1,g8112.t1,g8189.t1,g8283.t1,g8852.t1,g9160.t1,g9847.t1,g989.t1,g9954.t1	g10824.t1,g11626.t1,g11879.t1,g12187.t1,g12745.t1,g12779.t1,g12931.t1,g13035.t1,g14268.t1,g15090.t1,g15227.t1,g15228.t1,g15553.t1,g15609.t1,g16037.t1,g16482.t1,g16866.t1,g1923.t1,g2174.t1,g2735.t1,g3585.t1,g3649.t1,g3830.t1,g4339.t1,g5088.t1,g5290.t1,g5700.t1,g5836.t1,g591.t1,g6070.t1,g8112.t1,g8189.t1,g8283.t1,g8852.t1,g9160.t1,g9847.t1,g989.t1,g9954.t1	3.076915162,1.323694824,0.886978057,1.274768331,1.98865,1.60224546,0.812894382,1.345176512,1.171657699,-0.719726623,1.825505464,1.132724558,0.766026895,0.85298053,0.617361382,1.025867303,1.522671927,1.185504639,1.438168223,1.332701188,2.425886827,0.580752568,1.178909648,1.329450267,1.659652199,0.982121514,1.571754604,1.000989757,1.03594632,1.094162469,1.287682397,0.687377784,0.814753642,0.9953469…
GO Process	GO:0000727	Double-strand break repair via break-induced replication	6	12	7.55793	bottom	8.67e-07	afc	STRG0A56FBJ.g12939.t1,STRG0A56FBJ.g15498.t1,STRG0A56FBJ.g16515.t1,STRG0A56FBJ.g5003.t1,STRG0A56FBJ.g7006.t1,STRG0A56FBJ.g8245.t1	g12939.t1,g15498.t1,g16515.t1,g5003.t1,g7006.t1,g8245.t1	g12939.t1,g15498.t1,g16515.t1,g5003.t1,g7006.t1,g8245.t1	1.946426853,2.583958876,3.198996552,2.572178959,2.348747702,2.96905522
GO Process	GO:0006261	DNA-templated DNA replication	18	106	5.56816	bottom	8.67e-07	afc	STRG0A56FBJ.g11149.t1,STRG0A56FBJ.g11450.t1,STRG0A56FBJ.g11760.t1,STRG0A56FBJ.g12813.t1,STRG0A56FBJ.g12939.t1,STRG0A56FBJ.g13279.t1,STRG0A56FBJ.g15498.t1,STRG0A56FBJ.g16515.t1,STRG0A56FBJ.g16727.t1,STRG0A56FBJ.g16882.t1,STRG0A56FBJ.g2291.t1,STRG0A56FBJ.g2535.t1,STRG0A56FBJ.g4950.t1,STRG0A56FBJ.g5003.t1,STRG0A56FBJ.g6159.t1,STRG0A56FBJ.g7006.t1,STRG0A56FBJ.g8245.t1,STRG0A56FBJ.g8257.t1	g11149.t1,g11450.t1,g11760.t1,g12813.t1,g12939.t1,g13279.t1,g15498.t1,g16515.t1,g16727.t1,g16882.t1,g2291.t1,g2535.t1,g4950.t1,g5003.t1,g6159.t1,g7006.t1,g8245.t1,g8257.t1	g11149.t1,g11450.t1,g11760.t1,g12813.t1,g12939.t1,g13279.t1,g15498.t1,g16515.t1,g16727.t1,g16882.t1,g2291.t1,g2535.t1,g4950.t1,g5003.t1,g6159.t1,g7006.t1,g8245.t1,g8257.t1	-2.516745613,1.250435787,2.803416794,3.136441327,1.946426853,2.9608896,2.583958876,3.198996552,0.677920055,0.899961293,1.180377591,3.100627509,1.182797934,2.572178959,1.583158939,2.348747702,2.96905522,1.978067575
GO Process	GO:0006268	DNA unwinding involved in DNA replication	7	21	7.75386	bottom	8.67e-07	afc	STRG0A56FBJ.g12939.t1,STRG0A56FBJ.g15498.t1,STRG0A56FBJ.g16515.t1,STRG0A56FBJ.g2535.t1,STRG0A56FBJ.g5003.t1,STRG0A56FBJ.g7006.t1,STRG0A56FBJ.g8245.t1	g12939.t1,g15498.t1,g16515.t1,g2535.t1,g5003.t1,g7006.t1,g8245.t1	g12939.t1,g15498.t1,g16515.t1,g2535.t1,g5003.t1,g7006.t1,g8245.t1	1.946426853,2.583958876,3.198996552,3.100627509,2.572178959,2.348747702,2.96905522
GO Process	GO:0006270	DNA replication initiation	6	23	7.55793	bottom	8.67e-07	afc	STRG0A56FBJ.g12939.t1,STRG0A56FBJ.g15498.t1,STRG0A56FBJ.g16515.t1,STRG0A56FBJ.g5003.t1,STRG0A56FBJ.g7006.t1,STRG0A56FBJ.g8245.t1	g12939.t1,g15498.t1,g16515.t1,g5003.t1,g7006.t1,g8245.t1	g12939.t1,g15498.t1,g16515.t1,g5003.t1,g7006.t1,g8245.t1	1.946426853,2.583958876,3.198996552,2.572178959,2.348747702,2.96905522
GO Process	GO:0006271	DNA strand elongation involved in DNA replication	6	14	7.63961	bottom	8.67e-07	afc	STRG0A56FBJ.g12813.t1,STRG0A56FBJ.g13279.t1,STRG0A56FBJ.g16515.t1,STRG0A56FBJ.g5003.t1,STRG0A56FBJ.g6159.t1,STRG0A56FBJ.g7006.t1	g12813.t1,g13279.t1,g16515.t1,g5003.t1,g6159.t1,g7006.t1	g12813.t1,g13279.t1,g16515.t1,g5003.t1,g6159.t1,g7006.t1	3.136441327,2.9608896,3.198996552,2.572178959,1.583158939,2.348747702
GO Process	GO:0009451	RNA modification	20	151	4.69268	bottom	8.67e-07	afc	STRG0A56FBJ.g10084.t1,STRG0A56FBJ.g10133.t1,STRG0A56FBJ.g13042.t1,STRG0A56FBJ.g13272.t1,STRG0A56FBJ.g13403.t1,STRG0A56FBJ.g13718.t1,STRG0A56FBJ.g14243.t1,STRG0A56FBJ.g14888.t1,STRG0A56FBJ.g15397.t1,STRG0A56FBJ.g2232.t1,STRG0A56FBJ.g2311.t1,STRG0A56FBJ.g2667.t1,STRG0A56FBJ.g2692.t1,STRG0A56FBJ.g2843.t1,STRG0A56FBJ.g3125.t1,STRG0A56FBJ.g4179.t1,STRG0A56FBJ.g5301.t1,STRG0A56FBJ.g5518.t1,STRG0A56FBJ.…	g10084.t1,g10133.t1,g13042.t1,g13272.t1,g13403.t1,g13718.t1,g14243.t1,g14888.t1,g15397.t1,g2232.t1,g2311.t1,g2667.t1,g2692.t1,g2843.t1,g3125.t1,g4179.t1,g5301.t1,g5518.t1,g5895.t1,g9160.t1	g10084.t1,g10133.t1,g13042.t1,g13272.t1,g13403.t1,g13718.t1,g14243.t1,g14888.t1,g15397.t1,g2232.t1,g2311.t1,g2667.t1,g2692.t1,g2843.t1,g3125.t1,g4179.t1,g5301.t1,g5518.t1,g5895.t1,g9160.t1	0.688230921,1.383833489,2.741363783,1.420638048,2.214116895,0.949910569,1.524443724,1.60276862,0.857327905,2.461318418,1.591407605,1.247370659,1.439758596,2.508444172,2.154903887,1.009281909,2.271744918,0.896691268,1.256658224,1.045789749
GO Process	GO:0032508	DNA duplex unwinding	16	73	5.02614	bottom	8.67e-07	afc	STRG0A56FBJ.g12939.t1,STRG0A56FBJ.g15498.t1,STRG0A56FBJ.g16515.t1,STRG0A56FBJ.g16703.t1,STRG0A56FBJ.g16727.t1,STRG0A56FBJ.g16882.t1,STRG0A56FBJ.g1838.t1,STRG0A56FBJ.g2535.t1,STRG0A56FBJ.g5003.t1,STRG0A56FBJ.g5013.t1,STRG0A56FBJ.g6652.t1,STRG0A56FBJ.g7006.t1,STRG0A56FBJ.g8189.t1,STRG0A56FBJ.g8245.t1,STRG0A56FBJ.g8257.t1,STRG0A56FBJ.g8648.t1	g12939.t1,g15498.t1,g16515.t1,g16703.t1,g16727.t1,g16882.t1,g1838.t1,g2535.t1,g5003.t1,g5013.t1,g6652.t1,g7006.t1,g8189.t1,g8245.t1,g8257.t1,g8648.t1	g12939.t1,g15498.t1,g16515.t1,g16703.t1,g16727.t1,g16882.t1,g1838.t1,g2535.t1,g5003.t1,g5013.t1,g6652.t1,g7006.t1,g8189.t1,g8245.t1,g8257.t1,g8648.t1	1.946426853,2.583958876,3.198996552,1.854164198,0.677920055,0.899961293,0.809721044,3.100627509,2.572178959,1.809277871,1.07669455,2.348747702,0.687377784,2.96905522,1.978067575,-1.567835685
GO Process	GO:0071103	DNA conformation change	18	81	4.77743	bottom	8.67e-07	afc	STRG0A56FBJ.g12939.t1,STRG0A56FBJ.g14405.t1,STRG0A56FBJ.g15498.t1,STRG0A56FBJ.g16515.t1,STRG0A56FBJ.g16703.t1,STRG0A56FBJ.g16727.t1,STRG0A56FBJ.g16882.t1,STRG0A56FBJ.g1838.t1,STRG0A56FBJ.g2535.t1,STRG0A56FBJ.g5003.t1,STRG0A56FBJ.g5013.t1,STRG0A56FBJ.g599.t1,STRG0A56FBJ.g6652.t1,STRG0A56FBJ.g7006.t1,STRG0A56FBJ.g8189.t1,STRG0A56FBJ.g8245.t1,STRG0A56FBJ.g8257.t1,STRG0A56FBJ.g8648.t1	g12939.t1,g14405.t1,g15498.t1,g16515.t1,g16703.t1,g16727.t1,g16882.t1,g1838.t1,g2535.t1,g5003.t1,g5013.t1,g599.t1,g6652.t1,g7006.t1,g8189.t1,g8245.t1,g8257.t1,g8648.t1	g12939.t1,g14405.t1,g15498.t1,g16515.t1,g16703.t1,g16727.t1,g16882.t1,g1838.t1,g2535.t1,g5003.t1,g5013.t1,g599.t1,g6652.t1,g7006.t1,g8189.t1,g8245.t1,g8257.t1,g8648.t1	1.946426853,1.002378107,2.583958876,3.198996552,1.854164198,0.677920055,0.899961293,0.809721044,3.100627509,2.572178959,1.809277871,0.740816954,1.07669455,2.348747702,0.687377784,2.96905522,1.978067575,-1.567835685
GO Process	GO:0051253	Negative regulation of RNA metabolic process	48	442	3.02783	bottom	1e-06	ks	STRG0A56FBJ.g109.t1,STRG0A56FBJ.g11151.t1,STRG0A56FBJ.g11285.t1,STRG0A56FBJ.g11431.t1,STRG0A56FBJ.g11626.t1,STRG0A56FBJ.g11879.t1,STRG0A56FBJ.g11953.t1,STRG0A56FBJ.g12958.t1,STRG0A56FBJ.g13250.t1,STRG0A56FBJ.g13705.t1,STRG0A56FBJ.g14160.t1,STRG0A56FBJ.g14268.t1,STRG0A56FBJ.g1495.t1,STRG0A56FBJ.g1496.t1,STRG0A56FBJ.g15033.t1,STRG0A56FBJ.g15039.t1,STRG0A56FBJ.g15227.t1,STRG0A56FBJ.g15242.t1,STRG0A5…	g109.t1,g11151.t1,g11285.t1,g11431.t1,g11626.t1,g11879.t1,g11953.t1,g12958.t1,g13250.t1,g13705.t1,g14160.t1,g14268.t1,g1495.t1,g1496.t1,g15033.t1,g15039.t1,g15227.t1,g15242.t1,g15326.t1,g16595.t1,g16703.t1,g1838.t1,g2175.t1,g2489.t1,g2527.t1,g2933.t1,g3125.t1,g3781.t1,g3886.t1,g4163.t1,g4505.t1,g5137.t1,g5200.t1,g5290.t1,g5301.t1,g5710.t1,g6121.t1,g6549.t1,g6652.t1,g7268.t1,g7631.t1,g7975.t1,g798…	g109.t1,g11151.t1,g11285.t1,g11431.t1,g11626.t1,g11879.t1,g11953.t1,g12958.t1,g13250.t1,g13705.t1,g14160.t1,g14268.t1,g1495.t1,g1496.t1,g15033.t1,g15039.t1,g15227.t1,g15242.t1,g15326.t1,g16595.t1,g16703.t1,g1838.t1,g2175.t1,g2489.t1,g2527.t1,g2933.t1,g3125.t1,g3781.t1,g3886.t1,g4163.t1,g4505.t1,g5137.t1,g5200.t1,g5290.t1,g5301.t1,g5710.t1,g6121.t1,g6549.t1,g6652.t1,g7268.t1,g7631.t1,g7975.t1,g798…	0.979392542,0.667149877,0.772037949,1.33275789,1.323694824,0.886978057,1.345128774,1.163260983,1.420357293,0.797574806,1.410958354,1.171657699,-2.768579105,-2.318726146,1.162423469,1.39339247,1.825505464,1.836469269,0.839474537,0.729218637,1.854164198,0.809721044,0.942603195,1.593126435,1.747312737,1.043996403,2.154903887,0.87878332,-1.03407938,1.007511204,-0.658541943,0.712143131,0.700941323,0.9…
GO Process	GO:0006260	DNA replication	30	170	5.1335	bottom	1.48e-06	ks	STRG0A56FBJ.g11146.t1,STRG0A56FBJ.g11149.t1,STRG0A56FBJ.g11450.t1,STRG0A56FBJ.g11760.t1,STRG0A56FBJ.g12813.t1,STRG0A56FBJ.g12939.t1,STRG0A56FBJ.g13279.t1,STRG0A56FBJ.g13564.t1,STRG0A56FBJ.g14053.t1,STRG0A56FBJ.g14405.t1,STRG0A56FBJ.g15498.t1,STRG0A56FBJ.g1641.t1,STRG0A56FBJ.g16515.t1,STRG0A56FBJ.g16727.t1,STRG0A56FBJ.g16882.t1,STRG0A56FBJ.g2291.t1,STRG0A56FBJ.g2535.t1,STRG0A56FBJ.g3823.t1,STRG0A5…	g11146.t1,g11149.t1,g11450.t1,g11760.t1,g12813.t1,g12939.t1,g13279.t1,g13564.t1,g14053.t1,g14405.t1,g15498.t1,g1641.t1,g16515.t1,g16727.t1,g16882.t1,g2291.t1,g2535.t1,g3823.t1,g4950.t1,g5003.t1,g6159.t1,g6221.t1,g6691.t1,g7006.t1,g7265.t1,g8245.t1,g8257.t1,g8433.t1,g8648.t1,g8750.t1	g11146.t1,g11149.t1,g11450.t1,g11760.t1,g12813.t1,g12939.t1,g13279.t1,g13564.t1,g14053.t1,g14405.t1,g15498.t1,g1641.t1,g16515.t1,g16727.t1,g16882.t1,g2291.t1,g2535.t1,g3823.t1,g4950.t1,g5003.t1,g6159.t1,g6221.t1,g6691.t1,g7006.t1,g7265.t1,g8245.t1,g8257.t1,g8433.t1,g8648.t1,g8750.t1	2.8846113,-2.516745613,1.250435787,2.803416794,3.136441327,1.946426853,2.9608896,1.623357739,1.403403191,1.002378107,2.583958876,1.739105484,3.198996552,0.677920055,0.899961293,1.180377591,3.100627509,2.905608074,1.182797934,2.572178959,1.583158939,2.150819301,1.028068556,2.348747702,1.782588867,2.96905522,1.978067575,1.839087915,-1.567835685,1.047256745
GO Process	GO:0006913	Nucleocytoplasmic transport	34	148	3.60945	bottom	1.65e-06	ks	STRG0A56FBJ.g10039.t1,STRG0A56FBJ.g11285.t1,STRG0A56FBJ.g12575.t1,STRG0A56FBJ.g12610.t1,STRG0A56FBJ.g13823.t1,STRG0A56FBJ.g14143.t1,STRG0A56FBJ.g14357.t1,STRG0A56FBJ.g1520.t1,STRG0A56FBJ.g15228.t1,STRG0A56FBJ.g15473.t1,STRG0A56FBJ.g155.t1,STRG0A56FBJ.g16042.t1,STRG0A56FBJ.g2302.t1,STRG0A56FBJ.g2502.t1,STRG0A56FBJ.g2691.t1,STRG0A56FBJ.g4163.t1,STRG0A56FBJ.g4859.t1,STRG0A56FBJ.g486.t1,STRG0A56FBJ.g…	g10039.t1,g11285.t1,g12575.t1,g12610.t1,g13823.t1,g14143.t1,g14357.t1,g1520.t1,g15228.t1,g15473.t1,g155.t1,g16042.t1,g2302.t1,g2502.t1,g2691.t1,g4163.t1,g4859.t1,g486.t1,g4999.t1,g5135.t1,g5145.t1,g5596.t1,g5753.t1,g5804.t1,g5836.t1,g6070.t1,g6314.t1,g7320.t1,g7492.t1,g7668.t1,g7960.t1,g8469.t1,g8572.t1,g9847.t1	g10039.t1,g11285.t1,g12575.t1,g12610.t1,g13823.t1,g14143.t1,g14357.t1,g1520.t1,g15228.t1,g15473.t1,g155.t1,g16042.t1,g2302.t1,g2502.t1,g2691.t1,g4163.t1,g4859.t1,g486.t1,g4999.t1,g5135.t1,g5145.t1,g5596.t1,g5753.t1,g5804.t1,g5836.t1,g6070.t1,g6314.t1,g7320.t1,g7492.t1,g7668.t1,g7960.t1,g8469.t1,g8572.t1,g9847.t1	1.010755651,0.772037949,2.645434198,1.034527498,1.181457299,1.249711279,-1.144543544,0.995120911,1.132724558,0.83304777,1.300966725,0.776000669,1.238412198,1.396302797,1.487863113,1.007511204,1.577499013,0.687849045,1.300175126,1.08546447,2.01513142,1.181251645,2.174315398,1.039496532,1.000989757,1.094162469,1.154708524,1.049031779,0.665511061,0.820459674,1.114855048,1.296071445,1.764419174,1.839…
GO Process	GO:0030030	Cell projection organization	102	564	1.63847	top	2.03e-06	ks	STRG0A56FBJ.g10731.t1,STRG0A56FBJ.g10758.t1,STRG0A56FBJ.g10924.t1,STRG0A56FBJ.g1107.t1,STRG0A56FBJ.g11123.t1,STRG0A56FBJ.g11151.t1,STRG0A56FBJ.g11192.t1,STRG0A56FBJ.g11365.t1,STRG0A56FBJ.g11427.t1,STRG0A56FBJ.g11450.t1,STRG0A56FBJ.g1163.t1,STRG0A56FBJ.g11669.t1,STRG0A56FBJ.g11687.t1,STRG0A56FBJ.g1184.t1,STRG0A56FBJ.g11914.t1,STRG0A56FBJ.g1200.t1,STRG0A56FBJ.g12317.t1,STRG0A56FBJ.g12475.t1,STRG0A5…	g10731.t1,g10758.t1,g10924.t1,g1107.t1,g11123.t1,g11151.t1,g11192.t1,g11365.t1,g11427.t1,g11450.t1,g1163.t1,g11669.t1,g11687.t1,g1184.t1,g11914.t1,g1200.t1,g12317.t1,g12475.t1,g12792.t1,g12948.t1,g13233.t1,g13937.t1,g14096.t1,g14123.t1,g14261.t1,g14354.t1,g14407.t1,g14417.t1,g14418.t1,g1442.t1,g14423.t1,g14478.t1,g14497.t1,g14903.t1,g15129.t1,g15386.t1,g15901.t1,g15997.t1,g16005.t1,g16388.t1,g165…	g10731.t1,g10758.t1,g10924.t1,g1107.t1,g11123.t1,g11151.t1,g11192.t1,g11365.t1,g11427.t1,g11450.t1,g1163.t1,g11669.t1,g11687.t1,g1184.t1,g11914.t1,g1200.t1,g12317.t1,g12475.t1,g12792.t1,g12948.t1,g13233.t1,g13937.t1,g14096.t1,g14123.t1,g14261.t1,g14354.t1,g14407.t1,g14417.t1,g14418.t1,g1442.t1,g14423.t1,g14478.t1,g14497.t1,g14903.t1,g15129.t1,g15386.t1,g15901.t1,g15997.t1,g16005.t1,g16388.t1,g165…	-1.220928341,-1.275611172,-1.822056587,-1.290666174,-1.699788862,0.667149877,-1.459083788,1.301127155,-1.548932509,1.250435787,-3.157142953,-2.031043502,-0.870260402,-0.558880673,-1.526120692,-1.450673928,-1.681764555,0.718685466,-1.140978863,-1.69738072,-0.589624411,-1.214489932,-0.934510256,1.488579723,1.144245903,-1.131761386,-4.29407144,-1.983590108,-1.9227885,-0.779170172,-1.211608658,1.1671…
GO Process	GO:0044242	Cellular lipid catabolic process	45	161	2.25485	top	2.35e-06	ks	STRG0A56FBJ.g10290.t1,STRG0A56FBJ.g10703.t1,STRG0A56FBJ.g11126.t1,STRG0A56FBJ.g11538.t1,STRG0A56FBJ.g12333.t1,STRG0A56FBJ.g12334.t1,STRG0A56FBJ.g12540.t1,STRG0A56FBJ.g12948.t1,STRG0A56FBJ.g13168.t1,STRG0A56FBJ.g13232.t1,STRG0A56FBJ.g13677.t1,STRG0A56FBJ.g14050.t1,STRG0A56FBJ.g14120.t1,STRG0A56FBJ.g14236.t1,STRG0A56FBJ.g14406.t1,STRG0A56FBJ.g15058.t1,STRG0A56FBJ.g15467.t1,STRG0A56FBJ.g15687.t1,STR…	g10290.t1,g10703.t1,g11126.t1,g11538.t1,g12333.t1,g12334.t1,g12540.t1,g12948.t1,g13168.t1,g13232.t1,g13677.t1,g14050.t1,g14120.t1,g14236.t1,g14406.t1,g15058.t1,g15467.t1,g15687.t1,g15689.t1,g16095.t1,g16095.t3,g16440.t1,g16441.t1,g16461.t1,g16840.t1,g2134.t1,g2342.t1,g3828.t1,g3854.t1,g4505.t1,g4995.t1,g5348.t1,g5518.t1,g5589.t1,g6165.t1,g6549.t1,g6737.t1,g6907.t1,g749.t1,g7948.t1,g8541.t1,g8542.…	g10290.t1,g10703.t1,g11126.t1,g11538.t1,g12333.t1,g12334.t1,g12540.t1,g12948.t1,g13168.t1,g13232.t1,g13677.t1,g14050.t1,g14120.t1,g14236.t1,g14406.t1,g15058.t1,g15467.t1,g15687.t1,g15689.t1,g16095.t1,g16095.t3,g16440.t1,g16441.t1,g16461.t1,g16840.t1,g2134.t1,g2342.t1,g3828.t1,g3854.t1,g4505.t1,g4995.t1,g5348.t1,g5518.t1,g5589.t1,g6165.t1,g6549.t1,g6737.t1,g6907.t1,g749.t1,g7948.t1,g8541.t1,g8542.…	-0.769387904,-1.622559879,-0.871471982,-1.305824839,-1.392196703,-2.238113402,-0.954691762,-1.69738072,-1.167712946,-1.600701384,-1.725429596,-0.603196985,-1.924713712,-1.718221854,-2.519233849,-0.907349351,-0.488832176,-2.166546217,-1.268511085,-1.393923504,-0.65657216,-2.253090461,-1.936063544,-2.445508714,-1.190117235,-1.535293121,-0.718571217,-1.39731617,1.176241114,-0.658541943,-0.745263557,…
GO Process	GO:0120036	Plasma membrane bounded cell projection organization	101	544	1.62552	top	2.76e-06	ks	STRG0A56FBJ.g10731.t1,STRG0A56FBJ.g10758.t1,STRG0A56FBJ.g10924.t1,STRG0A56FBJ.g1107.t1,STRG0A56FBJ.g11123.t1,STRG0A56FBJ.g11151.t1,STRG0A56FBJ.g11192.t1,STRG0A56FBJ.g11365.t1,STRG0A56FBJ.g11427.t1,STRG0A56FBJ.g11450.t1,STRG0A56FBJ.g1163.t1,STRG0A56FBJ.g11669.t1,STRG0A56FBJ.g11687.t1,STRG0A56FBJ.g1184.t1,STRG0A56FBJ.g11914.t1,STRG0A56FBJ.g1200.t1,STRG0A56FBJ.g12317.t1,STRG0A56FBJ.g12475.t1,STRG0A5…	g10731.t1,g10758.t1,g10924.t1,g1107.t1,g11123.t1,g11151.t1,g11192.t1,g11365.t1,g11427.t1,g11450.t1,g1163.t1,g11669.t1,g11687.t1,g1184.t1,g11914.t1,g1200.t1,g12317.t1,g12475.t1,g12792.t1,g12948.t1,g13233.t1,g13937.t1,g14096.t1,g14123.t1,g14261.t1,g14354.t1,g14407.t1,g14417.t1,g14418.t1,g1442.t1,g14423.t1,g14478.t1,g14497.t1,g14903.t1,g15129.t1,g15386.t1,g15901.t1,g15997.t1,g16005.t1,g16388.t1,g165…	g10731.t1,g10758.t1,g10924.t1,g1107.t1,g11123.t1,g11151.t1,g11192.t1,g11365.t1,g11427.t1,g11450.t1,g1163.t1,g11669.t1,g11687.t1,g1184.t1,g11914.t1,g1200.t1,g12317.t1,g12475.t1,g12792.t1,g12948.t1,g13233.t1,g13937.t1,g14096.t1,g14123.t1,g14261.t1,g14354.t1,g14407.t1,g14417.t1,g14418.t1,g1442.t1,g14423.t1,g14478.t1,g14497.t1,g14903.t1,g15129.t1,g15386.t1,g15901.t1,g15997.t1,g16005.t1,g16388.t1,g165…	-1.220928341,-1.275611172,-1.822056587,-1.290666174,-1.699788862,0.667149877,-1.459083788,1.301127155,-1.548932509,1.250435787,-3.157142953,-2.031043502,-0.870260402,-0.558880673,-1.526120692,-1.450673928,-1.681764555,0.718685466,-1.140978863,-1.69738072,-0.589624411,-1.214489932,-0.934510256,1.488579723,1.144245903,-1.131761386,-4.29407144,-1.983590108,-1.9227885,-0.779170172,-1.211608658,1.1671…
GO Process	GO:0006399	tRNA metabolic process	37	173	3.4226	bottom	3.28e-06	ks	STRG0A56FBJ.g11200.t1,STRG0A56FBJ.g11999.t1,STRG0A56FBJ.g1226.t1,STRG0A56FBJ.g12722.t1,STRG0A56FBJ.g12816.t1,STRG0A56FBJ.g13042.t1,STRG0A56FBJ.g13148.t1,STRG0A56FBJ.g13718.t1,STRG0A56FBJ.g14243.t1,STRG0A56FBJ.g14888.t1,STRG0A56FBJ.g14992.t1,STRG0A56FBJ.g15309.t1,STRG0A56FBJ.g15326.t1,STRG0A56FBJ.g15397.t1,STRG0A56FBJ.g15871.t1,STRG0A56FBJ.g16382.t1,STRG0A56FBJ.g1837.t1,STRG0A56FBJ.g2232.t1,STRG0A…	g11200.t1,g11999.t1,g1226.t1,g12722.t1,g12816.t1,g13042.t1,g13148.t1,g13718.t1,g14243.t1,g14888.t1,g14992.t1,g15309.t1,g15326.t1,g15397.t1,g15871.t1,g16382.t1,g1837.t1,g2232.t1,g2311.t1,g2667.t1,g2692.t1,g3125.t1,g3726.t1,g4169.t1,g4179.t1,g4314.t1,g4814.t1,g5009.t1,g5518.t1,g5600.t1,g5654.t1,g5753.t1,g6534.t1,g7601.t1,g7640.t1,g8083.t1,g8501.t1	g11200.t1,g11999.t1,g1226.t1,g12722.t1,g12816.t1,g13042.t1,g13148.t1,g13718.t1,g14243.t1,g14888.t1,g14992.t1,g15309.t1,g15326.t1,g15397.t1,g15871.t1,g16382.t1,g1837.t1,g2232.t1,g2311.t1,g2667.t1,g2692.t1,g3125.t1,g3726.t1,g4169.t1,g4179.t1,g4314.t1,g4814.t1,g5009.t1,g5518.t1,g5600.t1,g5654.t1,g5753.t1,g6534.t1,g7601.t1,g7640.t1,g8083.t1,g8501.t1	0.787680476,0.877772701,0.906831892,0.677328044,1.567087336,2.741363783,0.812650421,0.949910569,1.524443724,1.60276862,0.980139671,0.83213681,0.839474537,0.857327905,-1.389163794,1.959919797,1.119870399,2.461318418,1.591407605,1.247370659,1.439758596,2.154903887,0.706896934,0.670097367,1.009281909,1.278523882,1.021450341,0.639498977,0.896691268,-0.953401937,0.822087679,2.174315398,0.819937584,1.2…
GO Process	GO:0015931	Nucleobase-containing compound transport	39	136	3.26467	bottom	4.28e-06	ks	STRG0A56FBJ.g10039.t1,STRG0A56FBJ.g11286.t1,STRG0A56FBJ.g11449.t1,STRG0A56FBJ.g11953.t1,STRG0A56FBJ.g12575.t1,STRG0A56FBJ.g12610.t1,STRG0A56FBJ.g12779.t1,STRG0A56FBJ.g14143.t1,STRG0A56FBJ.g14357.t1,STRG0A56FBJ.g14678.t1,STRG0A56FBJ.g1520.t1,STRG0A56FBJ.g15228.t1,STRG0A56FBJ.g15473.t1,STRG0A56FBJ.g155.t1,STRG0A56FBJ.g16042.t1,STRG0A56FBJ.g2302.t1,STRG0A56FBJ.g2502.t1,STRG0A56FBJ.g3026.t1,STRG0A56F…	g10039.t1,g11286.t1,g11449.t1,g11953.t1,g12575.t1,g12610.t1,g12779.t1,g14143.t1,g14357.t1,g14678.t1,g1520.t1,g15228.t1,g15473.t1,g155.t1,g16042.t1,g2302.t1,g2502.t1,g3026.t1,g3585.t1,g486.t1,g5135.t1,g5145.t1,g5753.t1,g5804.t1,g5836.t1,g6070.t1,g7313.t1,g7320.t1,g7492.t1,g7668.t1,g7945.t1,g7993.t1,g8112.t1,g8189.t1,g8572.t1,g8899.t1,g8899.t2,g9847.t1,g9954.t1	g10039.t1,g11286.t1,g11449.t1,g11953.t1,g12575.t1,g12610.t1,g12779.t1,g14143.t1,g14357.t1,g14678.t1,g1520.t1,g15228.t1,g15473.t1,g155.t1,g16042.t1,g2302.t1,g2502.t1,g3026.t1,g3585.t1,g486.t1,g5135.t1,g5145.t1,g5753.t1,g5804.t1,g5836.t1,g6070.t1,g7313.t1,g7320.t1,g7492.t1,g7668.t1,g7945.t1,g7993.t1,g8112.t1,g8189.t1,g8572.t1,g8899.t1,g8899.t2,g9847.t1,g9954.t1	1.010755651,-0.733803761,0.775495539,1.345128774,2.645434198,1.034527498,1.60224546,1.249711279,-1.144543544,1.282589578,0.995120911,1.132724558,0.83304777,1.300966725,0.776000669,1.238412198,1.396302797,0.95385127,2.425886827,0.687849045,1.08546447,2.01513142,2.174315398,1.039496532,1.000989757,1.094162469,-2.603965705,1.049031779,0.665511061,0.820459674,1.039408544,1.864979394,1.287682397,0.687…
GO Process	GO:0030031	Cell projection assembly	72	254	1.8932	top	4.85e-06	ks	STRG0A56FBJ.g10758.t1,STRG0A56FBJ.g10924.t1,STRG0A56FBJ.g1107.t1,STRG0A56FBJ.g11123.t1,STRG0A56FBJ.g11151.t1,STRG0A56FBJ.g11192.t1,STRG0A56FBJ.g11365.t1,STRG0A56FBJ.g11427.t1,STRG0A56FBJ.g1163.t1,STRG0A56FBJ.g11669.t1,STRG0A56FBJ.g11687.t1,STRG0A56FBJ.g11914.t1,STRG0A56FBJ.g1200.t1,STRG0A56FBJ.g12317.t1,STRG0A56FBJ.g12792.t1,STRG0A56FBJ.g14096.t1,STRG0A56FBJ.g14261.t1,STRG0A56FBJ.g14354.t1,STRG0A…	g10758.t1,g10924.t1,g1107.t1,g11123.t1,g11151.t1,g11192.t1,g11365.t1,g11427.t1,g1163.t1,g11669.t1,g11687.t1,g11914.t1,g1200.t1,g12317.t1,g12792.t1,g14096.t1,g14261.t1,g14354.t1,g14407.t1,g14417.t1,g14418.t1,g1442.t1,g14423.t1,g14478.t1,g14497.t1,g14903.t1,g15386.t1,g15901.t1,g15997.t1,g16005.t1,g16923.t1,g1936.t1,g1987.t1,g2149.t1,g2958.t1,g2962.t1,g2963.t1,g3015.t1,g3494.t1,g3503.t1,g3615.t1,g37…	g10758.t1,g10924.t1,g1107.t1,g11123.t1,g11151.t1,g11192.t1,g11365.t1,g11427.t1,g1163.t1,g11669.t1,g11687.t1,g11914.t1,g1200.t1,g12317.t1,g12792.t1,g14096.t1,g14261.t1,g14354.t1,g14407.t1,g14417.t1,g14418.t1,g1442.t1,g14423.t1,g14478.t1,g14497.t1,g14903.t1,g15386.t1,g15901.t1,g15997.t1,g16005.t1,g16923.t1,g1936.t1,g1987.t1,g2149.t1,g2958.t1,g2962.t1,g2963.t1,g3015.t1,g3494.t1,g3503.t1,g3615.t1,g37…	-1.275611172,-1.822056587,-1.290666174,-1.699788862,0.667149877,-1.459083788,1.301127155,-1.548932509,-3.157142953,-2.031043502,-0.870260402,-1.526120692,-1.450673928,-1.681764555,-1.140978863,-0.934510256,1.144245903,-1.131761386,-4.29407144,-1.983590108,-1.9227885,-0.779170172,-1.211608658,1.167173329,-0.679914888,-0.729194633,0.919143652,-1.132956181,-1.763957211,-0.945953705,1.452528103,-1.79…
GO Process	GO:0010498	Proteasomal protein catabolic process	40	244	2.68424	bottom	4.95e-06	ks	STRG0A56FBJ.g10276.t1,STRG0A56FBJ.g10278.t1,STRG0A56FBJ.g12552.t1,STRG0A56FBJ.g12683.t1,STRG0A56FBJ.g12895.t1,STRG0A56FBJ.g13343.t1,STRG0A56FBJ.g13459.t1,STRG0A56FBJ.g13905.t1,STRG0A56FBJ.g1394.t1,STRG0A56FBJ.g14156.t1,STRG0A56FBJ.g14221.t1,STRG0A56FBJ.g14870.t1,STRG0A56FBJ.g15359.t1,STRG0A56FBJ.g15390.t1,STRG0A56FBJ.g1559.t1,STRG0A56FBJ.g15900.t1,STRG0A56FBJ.g15904.t1,STRG0A56FBJ.g1932.t1,STRG0A…	g10276.t1,g10278.t1,g12552.t1,g12683.t1,g12895.t1,g13343.t1,g13459.t1,g13905.t1,g1394.t1,g14156.t1,g14221.t1,g14870.t1,g15359.t1,g15390.t1,g1559.t1,g15900.t1,g15904.t1,g1932.t1,g2004.t1,g2007.t1,g2886.t1,g4284.t1,g4294.t1,g4505.t1,g4910.t1,g5137.t1,g5366.t1,g5758.t1,g5777.t1,g6045.t1,g6668.t1,g6746.t1,g6848.t1,g7242.t1,g7443.t1,g7452.t1,g7940.t1,g8513.t1,g8726.t1,g8852.t1	g10276.t1,g10278.t1,g12552.t1,g12683.t1,g12895.t1,g13343.t1,g13459.t1,g13905.t1,g1394.t1,g14156.t1,g14221.t1,g14870.t1,g15359.t1,g15390.t1,g1559.t1,g15900.t1,g15904.t1,g1932.t1,g2004.t1,g2007.t1,g2886.t1,g4284.t1,g4294.t1,g4505.t1,g4910.t1,g5137.t1,g5366.t1,g5758.t1,g5777.t1,g6045.t1,g6668.t1,g6746.t1,g6848.t1,g7242.t1,g7443.t1,g7452.t1,g7940.t1,g8513.t1,g8726.t1,g8852.t1	0.911242154,1.189426926,0.570731486,0.860301544,1.165233075,1.096775086,1.102235089,0.735627922,0.832927726,0.728040913,1.277003378,-0.619959779,0.983277348,1.170458803,1.203339787,0.785747421,1.078733911,0.786041321,1.023713969,1.070813282,1.564059394,1.150589001,0.747557182,-0.658541943,0.779086533,0.712143131,0.602846021,1.336477968,1.237263135,0.844720151,1.362660509,-1.493989293,1.070715429,…
GO Process	GO:0140694	Non-membrane-bounded organelle assembly	39	163	3.24004	bottom	5.75e-06	ks	STRG0A56FBJ.g11285.t1,STRG0A56FBJ.g11663.t1,STRG0A56FBJ.g12100.t1,STRG0A56FBJ.g12483.t1,STRG0A56FBJ.g1274.t1,STRG0A56FBJ.g13403.t1,STRG0A56FBJ.g13683.t1,STRG0A56FBJ.g13787.t1,STRG0A56FBJ.g13795.t1,STRG0A56FBJ.g13806.t1,STRG0A56FBJ.g1408.t1,STRG0A56FBJ.g14125.t1,STRG0A56FBJ.g1421.t1,STRG0A56FBJ.g14268.t1,STRG0A56FBJ.g1441.t1,STRG0A56FBJ.g14697.t1,STRG0A56FBJ.g155.t1,STRG0A56FBJ.g17001.t1,STRG0A56F…	g11285.t1,g11663.t1,g12100.t1,g12483.t1,g1274.t1,g13403.t1,g13683.t1,g13787.t1,g13795.t1,g13806.t1,g1408.t1,g14125.t1,g1421.t1,g14268.t1,g1441.t1,g14697.t1,g155.t1,g17001.t1,g1838.t1,g2078.t1,g3054.t1,g3296.t1,g3744.t1,g5233.t1,g5658.t1,g5709.t1,g5774.t1,g6314.t1,g6689.t1,g6776.t1,g7055.t1,g7332.t1,g7553.t1,g8347.t1,g8593.t1,g8863.t1,g8947.t1,g9322.t1,g9850.t1	g11285.t1,g11663.t1,g12100.t1,g12483.t1,g1274.t1,g13403.t1,g13683.t1,g13787.t1,g13795.t1,g13806.t1,g1408.t1,g14125.t1,g1421.t1,g14268.t1,g1441.t1,g14697.t1,g155.t1,g17001.t1,g1838.t1,g2078.t1,g3054.t1,g3296.t1,g3744.t1,g5233.t1,g5658.t1,g5709.t1,g5774.t1,g6314.t1,g6689.t1,g6776.t1,g7055.t1,g7332.t1,g7553.t1,g8347.t1,g8593.t1,g8863.t1,g8947.t1,g9322.t1,g9850.t1	0.772037949,0.984807174,1.287950954,0.716963815,0.952117724,2.214116895,-0.777140521,1.355900429,1.222405846,0.741590607,0.969321812,3.057315031,1.885854734,1.171657699,1.377012035,1.401597345,1.300966725,1.723532574,0.809721044,1.5454733,1.291321052,2.124746259,-1.955153492,1.477380419,1.224197699,1.274102025,-3.59167108,1.154708524,1.05487624,1.404644675,0.971634419,-2.552743157,1.423745735,2.0…
GO Process	GO:0060285	Cilium-dependent cell motility	38	94	2.84053	top	5.85e-06	ks	STRG0A56FBJ.g10846.t1,STRG0A56FBJ.g10917.t1,STRG0A56FBJ.g10924.t1,STRG0A56FBJ.g1107.t1,STRG0A56FBJ.g11192.t1,STRG0A56FBJ.g1163.t1,STRG0A56FBJ.g11838.t1,STRG0A56FBJ.g14096.t1,STRG0A56FBJ.g14407.t1,STRG0A56FBJ.g14418.t1,STRG0A56FBJ.g14497.t1,STRG0A56FBJ.g14855.t1,STRG0A56FBJ.g14903.t1,STRG0A56FBJ.g15613.t1,STRG0A56FBJ.g15901.t1,STRG0A56FBJ.g15997.t1,STRG0A56FBJ.g16923.t1,STRG0A56FBJ.g2963.t1,STRG0A…	g10846.t1,g10917.t1,g10924.t1,g1107.t1,g11192.t1,g1163.t1,g11838.t1,g14096.t1,g14407.t1,g14418.t1,g14497.t1,g14855.t1,g14903.t1,g15613.t1,g15901.t1,g15997.t1,g16923.t1,g2963.t1,g3615.t1,g4127.t1,g4477.t1,g4478.t1,g4721.t1,g4791.t1,g5169.t1,g5208.t1,g5374.t1,g5404.t1,g5495.t1,g5538.t1,g5992.t1,g6104.t1,g6145.t1,g6188.t1,g6569.t1,g7276.t1,g7532.t1,g8497.t1	g10846.t1,g10917.t1,g10924.t1,g1107.t1,g11192.t1,g1163.t1,g11838.t1,g14096.t1,g14407.t1,g14418.t1,g14497.t1,g14855.t1,g14903.t1,g15613.t1,g15901.t1,g15997.t1,g16923.t1,g2963.t1,g3615.t1,g4127.t1,g4477.t1,g4478.t1,g4721.t1,g4791.t1,g5169.t1,g5208.t1,g5374.t1,g5404.t1,g5495.t1,g5538.t1,g5992.t1,g6104.t1,g6145.t1,g6188.t1,g6569.t1,g7276.t1,g7532.t1,g8497.t1	-1.738312781,-2.043393813,-1.822056587,-1.290666174,-1.459083788,-3.157142953,0.904655247,-0.934510256,-4.29407144,-1.9227885,-0.679914888,-2.081382031,-0.729194633,-1.657614944,-1.132956181,-1.763957211,1.452528103,-1.406934044,-2.185771866,-2.270727405,-1.081526397,-1.660121552,-1.469284384,-0.967146033,-0.717229388,-1.443501782,-1.434516948,-1.459598006,-2.099263283,-1.753789775,-1.289815818,-…
GO Process	GO:0033554	Cellular response to stress	92	815	2.56263	bottom	8.12e-06	ks	STRG0A56FBJ.g10285.t1,STRG0A56FBJ.g10956.t1,STRG0A56FBJ.g11146.t1,STRG0A56FBJ.g11149.t1,STRG0A56FBJ.g11151.t1,STRG0A56FBJ.g11267.t1,STRG0A56FBJ.g11760.t1,STRG0A56FBJ.g11879.t1,STRG0A56FBJ.g12480.t1,STRG0A56FBJ.g12483.t1,STRG0A56FBJ.g12683.t1,STRG0A56FBJ.g12727.t1,STRG0A56FBJ.g12813.t1,STRG0A56FBJ.g12837.t1,STRG0A56FBJ.g12895.t1,STRG0A56FBJ.g12899.t1,STRG0A56FBJ.g12914.t1,STRG0A56FBJ.g12939.t1,STR…	g10285.t1,g10956.t1,g11146.t1,g11149.t1,g11151.t1,g11267.t1,g11760.t1,g11879.t1,g12480.t1,g12483.t1,g12683.t1,g12727.t1,g12813.t1,g12837.t1,g12895.t1,g12899.t1,g12914.t1,g12939.t1,g12956.t1,g13040.t1,g13120.t1,g13267.t1,g13279.t1,g13564.t1,g13567.t1,g13683.t1,g13711.t1,g14221.t1,g14370.t1,g1475.t1,g14886.t1,g15498.t1,g16515.t1,g16595.t1,g16646.t1,g16703.t1,g16727.t1,g16882.t1,g1737.t1,g1838.t1,g2…	g10285.t1,g10956.t1,g11146.t1,g11149.t1,g11151.t1,g11267.t1,g11760.t1,g11879.t1,g12480.t1,g12483.t1,g12683.t1,g12727.t1,g12813.t1,g12837.t1,g12895.t1,g12899.t1,g12914.t1,g12939.t1,g12956.t1,g13040.t1,g13120.t1,g13267.t1,g13279.t1,g13564.t1,g13567.t1,g13683.t1,g13711.t1,g14221.t1,g14370.t1,g1475.t1,g14886.t1,g15498.t1,g16515.t1,g16595.t1,g16646.t1,g16703.t1,g16727.t1,g16882.t1,g1737.t1,g1838.t1,g2…	0.726460094,1.294215006,2.8846113,-2.516745613,0.667149877,0.687874324,2.803416794,0.886978057,-2.28003569,0.716963815,0.860301544,-1.261457075,3.136441327,1.198708879,1.165233075,1.852133369,1.186783884,1.946426853,-1.219385603,-0.951467383,1.388589858,0.866781681,2.9608896,1.623357739,-2.400641123,-0.777140521,-1.026582775,1.277003378,0.618484044,-0.735042407,0.737221712,2.583958876,3.198996552…
GO Process	GO:0051028	mRNA transport	31	83	3.50282	bottom	8.12e-06	ks	STRG0A56FBJ.g10039.t1,STRG0A56FBJ.g11449.t1,STRG0A56FBJ.g11953.t1,STRG0A56FBJ.g12779.t1,STRG0A56FBJ.g14143.t1,STRG0A56FBJ.g14357.t1,STRG0A56FBJ.g14678.t1,STRG0A56FBJ.g1520.t1,STRG0A56FBJ.g15228.t1,STRG0A56FBJ.g15473.t1,STRG0A56FBJ.g16042.t1,STRG0A56FBJ.g2302.t1,STRG0A56FBJ.g2502.t1,STRG0A56FBJ.g3026.t1,STRG0A56FBJ.g3585.t1,STRG0A56FBJ.g486.t1,STRG0A56FBJ.g5135.t1,STRG0A56FBJ.g5145.t1,STRG0A56FBJ.…	g10039.t1,g11449.t1,g11953.t1,g12779.t1,g14143.t1,g14357.t1,g14678.t1,g1520.t1,g15228.t1,g15473.t1,g16042.t1,g2302.t1,g2502.t1,g3026.t1,g3585.t1,g486.t1,g5135.t1,g5145.t1,g5836.t1,g6070.t1,g7320.t1,g7492.t1,g7945.t1,g7993.t1,g8112.t1,g8189.t1,g8572.t1,g8899.t1,g8899.t2,g9847.t1,g9954.t1	g10039.t1,g11449.t1,g11953.t1,g12779.t1,g14143.t1,g14357.t1,g14678.t1,g1520.t1,g15228.t1,g15473.t1,g16042.t1,g2302.t1,g2502.t1,g3026.t1,g3585.t1,g486.t1,g5135.t1,g5145.t1,g5836.t1,g6070.t1,g7320.t1,g7492.t1,g7945.t1,g7993.t1,g8112.t1,g8189.t1,g8572.t1,g8899.t1,g8899.t2,g9847.t1,g9954.t1	1.010755651,0.775495539,1.345128774,1.60224546,1.249711279,-1.144543544,1.282589578,0.995120911,1.132724558,0.83304777,0.776000669,1.238412198,1.396302797,0.95385127,2.425886827,0.687849045,1.08546447,2.01513142,1.000989757,1.094162469,1.049031779,0.665511061,1.039408544,1.864979394,1.287682397,0.687377784,1.764419174,0.866737309,0.817729744,1.839864242,1.428258634
GO Process	GO:0007010	Cytoskeleton organization	154	715	1.06306	top	1.11e-05	ks	STRG0A56FBJ.g10320.t1,STRG0A56FBJ.g10731.t1,STRG0A56FBJ.g10924.t1,STRG0A56FBJ.g11123.t1,STRG0A56FBJ.g11147.t1,STRG0A56FBJ.g11151.t1,STRG0A56FBJ.g11192.t1,STRG0A56FBJ.g11365.t1,STRG0A56FBJ.g11450.t1,STRG0A56FBJ.g11489.t1,STRG0A56FBJ.g1163.t1,STRG0A56FBJ.g11669.t1,STRG0A56FBJ.g11675.t1,STRG0A56FBJ.g11687.t1,STRG0A56FBJ.g11714.t1,STRG0A56FBJ.g11722.t1,STRG0A56FBJ.g11914.t1,STRG0A56FBJ.g12026.t1,STRG…	g10320.t1,g10731.t1,g10924.t1,g11123.t1,g11147.t1,g11151.t1,g11192.t1,g11365.t1,g11450.t1,g11489.t1,g1163.t1,g11669.t1,g11675.t1,g11687.t1,g11714.t1,g11722.t1,g11914.t1,g12026.t1,g12402.t1,g12475.t1,g12483.t1,g12513.t1,g1274.t1,g12792.t1,g13046.t1,g1321.t1,g1322.t1,g1323.t1,g1325.t1,g13319.t1,g13390.t1,g13424.t1,g13497.t1,g13683.t1,g13738.t1,g13780.t1,g13795.t1,g14048.t1,g1408.t1,g14096.t1,g1411.…	g10320.t1,g10731.t1,g10924.t1,g11123.t1,g11147.t1,g11151.t1,g11192.t1,g11365.t1,g11450.t1,g11489.t1,g1163.t1,g11669.t1,g11675.t1,g11687.t1,g11714.t1,g11722.t1,g11914.t1,g12026.t1,g12402.t1,g12475.t1,g12483.t1,g12513.t1,g1274.t1,g12792.t1,g13046.t1,g1321.t1,g1322.t1,g1323.t1,g1325.t1,g13319.t1,g13390.t1,g13424.t1,g13497.t1,g13683.t1,g13738.t1,g13780.t1,g13795.t1,g14048.t1,g1408.t1,g14096.t1,g1411.…	-1.70176532,-1.220928341,-1.822056587,-1.699788862,-0.975709064,0.667149877,-1.459083788,1.301127155,1.250435787,-1.185159978,-3.157142953,-2.031043502,-0.941109181,-0.870260402,0.689803233,-1.127746704,-1.526120692,0.870119299,-1.2925154,0.718685466,0.716963815,0.728606639,0.952117724,-1.140978863,-1.012870911,-1.003654427,-0.583720916,-1.105933301,-0.703300437,-1.071236335,-0.56891928,-1.123063…
GO Process	GO:0048024	Regulation of mRNA splicing, via spliceosome	30	62	3.74314	bottom	1.11e-05	ks	STRG0A56FBJ.g10824.t1,STRG0A56FBJ.g11626.t1,STRG0A56FBJ.g11879.t1,STRG0A56FBJ.g12779.t1,STRG0A56FBJ.g12931.t1,STRG0A56FBJ.g13035.t1,STRG0A56FBJ.g14268.t1,STRG0A56FBJ.g15090.t1,STRG0A56FBJ.g15227.t1,STRG0A56FBJ.g15228.t1,STRG0A56FBJ.g15553.t1,STRG0A56FBJ.g15609.t1,STRG0A56FBJ.g16037.t1,STRG0A56FBJ.g16482.t1,STRG0A56FBJ.g16866.t1,STRG0A56FBJ.g1923.t1,STRG0A56FBJ.g2174.t1,STRG0A56FBJ.g2735.t1,STRG0A…	g10824.t1,g11626.t1,g11879.t1,g12779.t1,g12931.t1,g13035.t1,g14268.t1,g15090.t1,g15227.t1,g15228.t1,g15553.t1,g15609.t1,g16037.t1,g16482.t1,g16866.t1,g1923.t1,g2174.t1,g2735.t1,g3585.t1,g4339.t1,g5088.t1,g5290.t1,g5836.t1,g591.t1,g6070.t1,g8112.t1,g8852.t1,g9160.t1,g989.t1,g9954.t1	g10824.t1,g11626.t1,g11879.t1,g12779.t1,g12931.t1,g13035.t1,g14268.t1,g15090.t1,g15227.t1,g15228.t1,g15553.t1,g15609.t1,g16037.t1,g16482.t1,g16866.t1,g1923.t1,g2174.t1,g2735.t1,g3585.t1,g4339.t1,g5088.t1,g5290.t1,g5836.t1,g591.t1,g6070.t1,g8112.t1,g8852.t1,g9160.t1,g989.t1,g9954.t1	3.076915162,1.323694824,0.886978057,1.60224546,0.812894382,1.345176512,1.171657699,-0.719726623,1.825505464,1.132724558,0.766026895,0.85298053,0.617361382,1.025867303,1.522671927,1.185504639,1.438168223,1.332701188,2.425886827,1.329450267,1.659652199,0.982121514,1.000989757,1.03594632,1.094162469,1.287682397,0.995346924,1.045789749,1.07071366,1.428258634
GO Process	GO:0030029	Actin filament-based process	47	305	1.46336	top	1.64e-05	ks	STRG0A56FBJ.g10320.t1,STRG0A56FBJ.g10731.t1,STRG0A56FBJ.g11147.t1,STRG0A56FBJ.g11151.t1,STRG0A56FBJ.g11675.t1,STRG0A56FBJ.g11687.t1,STRG0A56FBJ.g11714.t1,STRG0A56FBJ.g11722.t1,STRG0A56FBJ.g12513.t1,STRG0A56FBJ.g12792.t1,STRG0A56FBJ.g12926.t1,STRG0A56FBJ.g13046.t1,STRG0A56FBJ.g13319.t1,STRG0A56FBJ.g13390.t1,STRG0A56FBJ.g14255.t1,STRG0A56FBJ.g15258.t1,STRG0A56FBJ.g15776.t1,STRG0A56FBJ.g15777.t1,STR…	g10320.t1,g10731.t1,g11147.t1,g11151.t1,g11675.t1,g11687.t1,g11714.t1,g11722.t1,g12513.t1,g12792.t1,g12926.t1,g13046.t1,g13319.t1,g13390.t1,g14255.t1,g15258.t1,g15776.t1,g15777.t1,g15778.t1,g16456.t1,g17017.t1,g1786.t1,g1970.t1,g2923.t1,g2947.t1,g3399.t1,g3466.t1,g3508.t1,g4454.t1,g448.t1,g4992.t1,g5028.t1,g5212.t1,g5366.t1,g5730.t1,g5733.t1,g5863.t1,g6486.t1,g6547.t1,g6630.t1,g6665.t1,g6799.t1,g…	g10320.t1,g10731.t1,g11147.t1,g11151.t1,g11675.t1,g11687.t1,g11714.t1,g11722.t1,g12513.t1,g12792.t1,g12926.t1,g13046.t1,g13319.t1,g13390.t1,g14255.t1,g15258.t1,g15776.t1,g15777.t1,g15778.t1,g16456.t1,g17017.t1,g1786.t1,g1970.t1,g2923.t1,g2947.t1,g3399.t1,g3466.t1,g3508.t1,g4454.t1,g448.t1,g4992.t1,g5028.t1,g5212.t1,g5366.t1,g5730.t1,g5733.t1,g5863.t1,g6486.t1,g6547.t1,g6630.t1,g6665.t1,g6799.t1,g…	-1.70176532,-1.220928341,-0.975709064,0.667149877,-0.941109181,-0.870260402,0.689803233,-1.127746704,0.728606639,-1.140978863,-2.207566853,-1.012870911,-1.071236335,-0.56891928,-0.775988852,-0.977000462,-1.472710602,-0.499906811,-0.570766721,-0.536542184,-1.171609195,-0.735907999,-1.816120671,-1.235571717,-0.692727042,-1.075779746,-1.610684843,-1.645874695,-0.709428932,-1.9879967,-1.69090831,1.34…
GO Process	GO:0034728	Nucleosome organization	16	48	4.68419	bottom	1.64e-05	afc	STRG0A56FBJ.g11926.t1,STRG0A56FBJ.g13279.t1,STRG0A56FBJ.g13480.t1,STRG0A56FBJ.g14053.t1,STRG0A56FBJ.g15039.t1,STRG0A56FBJ.g2291.t1,STRG0A56FBJ.g3271.t1,STRG0A56FBJ.g3309.t1,STRG0A56FBJ.g6221.t1,STRG0A56FBJ.g6691.t1,STRG0A56FBJ.g6719.t1,STRG0A56FBJ.g7531.t1,STRG0A56FBJ.g8245.t1,STRG0A56FBJ.g8283.t1,STRG0A56FBJ.g8924.t1,STRG0A56FBJ.g992.t1	g11926.t1,g13279.t1,g13480.t1,g14053.t1,g15039.t1,g2291.t1,g3271.t1,g3309.t1,g6221.t1,g6691.t1,g6719.t1,g7531.t1,g8245.t1,g8283.t1,g8924.t1,g992.t1	g11926.t1,g13279.t1,g13480.t1,g14053.t1,g15039.t1,g2291.t1,g3271.t1,g3309.t1,g6221.t1,g6691.t1,g6719.t1,g7531.t1,g8245.t1,g8283.t1,g8924.t1,g992.t1	1.048116873,2.9608896,1.083975433,1.403403191,1.39339247,1.180377591,2.204611404,0.769002692,2.150819301,1.028068556,0.913792047,1.998676726,2.96905522,0.814753642,1.051253324,1.991254838
GO Process	GO:0060271	Cilium assembly	66	225	1.94517	top	1.64e-05	ks	STRG0A56FBJ.g10758.t1,STRG0A56FBJ.g10924.t1,STRG0A56FBJ.g1107.t1,STRG0A56FBJ.g11123.t1,STRG0A56FBJ.g11192.t1,STRG0A56FBJ.g11365.t1,STRG0A56FBJ.g11427.t1,STRG0A56FBJ.g1163.t1,STRG0A56FBJ.g11669.t1,STRG0A56FBJ.g11914.t1,STRG0A56FBJ.g1200.t1,STRG0A56FBJ.g14096.t1,STRG0A56FBJ.g14261.t1,STRG0A56FBJ.g14354.t1,STRG0A56FBJ.g14407.t1,STRG0A56FBJ.g14417.t1,STRG0A56FBJ.g14418.t1,STRG0A56FBJ.g1442.t1,STRG0A5…	g10758.t1,g10924.t1,g1107.t1,g11123.t1,g11192.t1,g11365.t1,g11427.t1,g1163.t1,g11669.t1,g11914.t1,g1200.t1,g14096.t1,g14261.t1,g14354.t1,g14407.t1,g14417.t1,g14418.t1,g1442.t1,g14423.t1,g14478.t1,g14497.t1,g14903.t1,g15386.t1,g15901.t1,g15997.t1,g16005.t1,g16923.t1,g1936.t1,g1987.t1,g2149.t1,g2958.t1,g2962.t1,g2963.t1,g3015.t1,g3494.t1,g3503.t1,g3615.t1,g3729.t1,g4109.t1,g4413.t1,g4477.t1,g4478.t…	g10758.t1,g10924.t1,g1107.t1,g11123.t1,g11192.t1,g11365.t1,g11427.t1,g1163.t1,g11669.t1,g11914.t1,g1200.t1,g14096.t1,g14261.t1,g14354.t1,g14407.t1,g14417.t1,g14418.t1,g1442.t1,g14423.t1,g14478.t1,g14497.t1,g14903.t1,g15386.t1,g15901.t1,g15997.t1,g16005.t1,g16923.t1,g1936.t1,g1987.t1,g2149.t1,g2958.t1,g2962.t1,g2963.t1,g3015.t1,g3494.t1,g3503.t1,g3615.t1,g3729.t1,g4109.t1,g4413.t1,g4477.t1,g4478.t…	-1.275611172,-1.822056587,-1.290666174,-1.699788862,-1.459083788,1.301127155,-1.548932509,-3.157142953,-2.031043502,-1.526120692,-1.450673928,-0.934510256,1.144245903,-1.131761386,-4.29407144,-1.983590108,-1.9227885,-0.779170172,-1.211608658,1.167173329,-0.679914888,-0.729194633,0.919143652,-1.132956181,-1.763957211,-0.945953705,1.452528103,-1.798760085,-1.463184988,-1.503291743,-1.67478109,-2.14…
GO Process	GO:0120031	Plasma membrane bounded cell projection assembly	69	245	1.91022	top	1.64e-05	ks	STRG0A56FBJ.g10758.t1,STRG0A56FBJ.g10924.t1,STRG0A56FBJ.g1107.t1,STRG0A56FBJ.g11123.t1,STRG0A56FBJ.g11151.t1,STRG0A56FBJ.g11192.t1,STRG0A56FBJ.g11365.t1,STRG0A56FBJ.g11427.t1,STRG0A56FBJ.g1163.t1,STRG0A56FBJ.g11669.t1,STRG0A56FBJ.g11914.t1,STRG0A56FBJ.g1200.t1,STRG0A56FBJ.g12317.t1,STRG0A56FBJ.g12792.t1,STRG0A56FBJ.g14096.t1,STRG0A56FBJ.g14261.t1,STRG0A56FBJ.g14354.t1,STRG0A56FBJ.g14407.t1,STRG0A…	g10758.t1,g10924.t1,g1107.t1,g11123.t1,g11151.t1,g11192.t1,g11365.t1,g11427.t1,g1163.t1,g11669.t1,g11914.t1,g1200.t1,g12317.t1,g12792.t1,g14096.t1,g14261.t1,g14354.t1,g14407.t1,g14417.t1,g14418.t1,g1442.t1,g14423.t1,g14478.t1,g14497.t1,g14903.t1,g15386.t1,g15901.t1,g15997.t1,g16005.t1,g16923.t1,g1936.t1,g1987.t1,g2149.t1,g2958.t1,g2962.t1,g2963.t1,g3015.t1,g3494.t1,g3503.t1,g3615.t1,g3729.t1,g410…	g10758.t1,g10924.t1,g1107.t1,g11123.t1,g11151.t1,g11192.t1,g11365.t1,g11427.t1,g1163.t1,g11669.t1,g11914.t1,g1200.t1,g12317.t1,g12792.t1,g14096.t1,g14261.t1,g14354.t1,g14407.t1,g14417.t1,g14418.t1,g1442.t1,g14423.t1,g14478.t1,g14497.t1,g14903.t1,g15386.t1,g15901.t1,g15997.t1,g16005.t1,g16923.t1,g1936.t1,g1987.t1,g2149.t1,g2958.t1,g2962.t1,g2963.t1,g3015.t1,g3494.t1,g3503.t1,g3615.t1,g3729.t1,g410…	-1.275611172,-1.822056587,-1.290666174,-1.699788862,0.667149877,-1.459083788,1.301127155,-1.548932509,-3.157142953,-2.031043502,-1.526120692,-1.450673928,-1.681764555,-1.140978863,-0.934510256,1.144245903,-1.131761386,-4.29407144,-1.983590108,-1.9227885,-0.779170172,-1.211608658,1.167173329,-0.679914888,-0.729194633,0.919143652,-1.132956181,-1.763957211,-0.945953705,1.452528103,-1.798760085,-1.46…
GO Process	GO:0035082	Axoneme assembly	45	77	2.1107	top	1.67e-05	ks	STRG0A56FBJ.g10924.t1,STRG0A56FBJ.g11123.t1,STRG0A56FBJ.g11192.t1,STRG0A56FBJ.g1163.t1,STRG0A56FBJ.g11669.t1,STRG0A56FBJ.g11914.t1,STRG0A56FBJ.g14096.t1,STRG0A56FBJ.g14261.t1,STRG0A56FBJ.g14418.t1,STRG0A56FBJ.g14423.t1,STRG0A56FBJ.g14497.t1,STRG0A56FBJ.g14903.t1,STRG0A56FBJ.g15386.t1,STRG0A56FBJ.g15901.t1,STRG0A56FBJ.g15997.t1,STRG0A56FBJ.g16005.t1,STRG0A56FBJ.g16923.t1,STRG0A56FBJ.g1936.t1,STRG0…	g10924.t1,g11123.t1,g11192.t1,g1163.t1,g11669.t1,g11914.t1,g14096.t1,g14261.t1,g14418.t1,g14423.t1,g14497.t1,g14903.t1,g15386.t1,g15901.t1,g15997.t1,g16005.t1,g16923.t1,g1936.t1,g1987.t1,g2962.t1,g2963.t1,g3494.t1,g3615.t1,g3729.t1,g4109.t1,g4477.t1,g4478.t1,g4721.t1,g4791.t1,g5092.t1,g5208.t1,g5374.t1,g5431.t1,g5538.t1,g5641.t1,g5835.t1,g5992.t1,g6104.t1,g6188.t1,g6546.t1,g6569.t1,g6678.t1,g7226…	g10924.t1,g11123.t1,g11192.t1,g1163.t1,g11669.t1,g11914.t1,g14096.t1,g14261.t1,g14418.t1,g14423.t1,g14497.t1,g14903.t1,g15386.t1,g15901.t1,g15997.t1,g16005.t1,g16923.t1,g1936.t1,g1987.t1,g2962.t1,g2963.t1,g3494.t1,g3615.t1,g3729.t1,g4109.t1,g4477.t1,g4478.t1,g4721.t1,g4791.t1,g5092.t1,g5208.t1,g5374.t1,g5431.t1,g5538.t1,g5641.t1,g5835.t1,g5992.t1,g6104.t1,g6188.t1,g6546.t1,g6569.t1,g6678.t1,g7226…	-1.822056587,-1.699788862,-1.459083788,-3.157142953,-2.031043502,-1.526120692,-0.934510256,1.144245903,-1.9227885,-1.211608658,-0.679914888,-0.729194633,0.919143652,-1.132956181,-1.763957211,-0.945953705,1.452528103,-1.798760085,-1.463184988,-2.147871691,-1.406934044,-2.024438995,-2.185771866,-0.938955922,0.855078437,-1.081526397,-1.660121552,-1.469284384,-0.967146033,-1.650906596,-1.443501782,-1…
GO Process	GO:0006334	Nucleosome assembly	10	29	5.61875	bottom	1.76e-05	afc	STRG0A56FBJ.g13279.t1,STRG0A56FBJ.g13480.t1,STRG0A56FBJ.g14053.t1,STRG0A56FBJ.g2291.t1,STRG0A56FBJ.g3271.t1,STRG0A56FBJ.g6221.t1,STRG0A56FBJ.g7531.t1,STRG0A56FBJ.g8245.t1,STRG0A56FBJ.g8924.t1,STRG0A56FBJ.g992.t1	g13279.t1,g13480.t1,g14053.t1,g2291.t1,g3271.t1,g6221.t1,g7531.t1,g8245.t1,g8924.t1,g992.t1	g13279.t1,g13480.t1,g14053.t1,g2291.t1,g3271.t1,g6221.t1,g7531.t1,g8245.t1,g8924.t1,g992.t1	2.9608896,1.083975433,1.403403191,1.180377591,2.204611404,2.150819301,1.998676726,2.96905522,1.051253324,1.991254838
GO Process	GO:0016192	Vesicle-mediated transport	83	728	1.30983	top	2.03e-05	ks	STRG0A56FBJ.g1054.t1,STRG0A56FBJ.g1054.t2,STRG0A56FBJ.g10731.t1,STRG0A56FBJ.g10766.t1,STRG0A56FBJ.g10903.t1,STRG0A56FBJ.g1114.t1,STRG0A56FBJ.g11440.t1,STRG0A56FBJ.g11828.t1,STRG0A56FBJ.g1184.t1,STRG0A56FBJ.g11910.t1,STRG0A56FBJ.g12297.t1,STRG0A56FBJ.g12515.t1,STRG0A56FBJ.g12805.t1,STRG0A56FBJ.g12918.t1,STRG0A56FBJ.g12928.t1,STRG0A56FBJ.g13420.t1,STRG0A56FBJ.g13436.t1,STRG0A56FBJ.g1352.t1,STRG0A56…	g1054.t1,g1054.t2,g10731.t1,g10766.t1,g10903.t1,g1114.t1,g11440.t1,g11828.t1,g1184.t1,g11910.t1,g12297.t1,g12515.t1,g12805.t1,g12918.t1,g12928.t1,g13420.t1,g13436.t1,g1352.t1,g13530.t1,g13970.t1,g14240.t1,g14370.t1,g14468.t1,g1475.t1,g14943.t1,g15023.t1,g15059.t1,g15145.t1,g15310.t1,g15533.t1,g16341.t1,g1647.t1,g16980.t1,g16987.t1,g17015.t1,g1729.t1,g1745.t1,g1876.t1,g2241.t1,g2253.t1,g2262.t1,g2…	g1054.t1,g1054.t2,g10731.t1,g10766.t1,g10903.t1,g1114.t1,g11440.t1,g11828.t1,g1184.t1,g11910.t1,g12297.t1,g12515.t1,g12805.t1,g12918.t1,g12928.t1,g13420.t1,g13436.t1,g1352.t1,g13530.t1,g13970.t1,g14240.t1,g14370.t1,g14468.t1,g1475.t1,g14943.t1,g15023.t1,g15059.t1,g15145.t1,g15310.t1,g15533.t1,g16341.t1,g1647.t1,g16980.t1,g16987.t1,g17015.t1,g1729.t1,g1745.t1,g1876.t1,g2241.t1,g2253.t1,g2262.t1,g2…	-1.614412262,-2.291080842,-1.220928341,0.888880428,-1.602351617,-0.814607868,-1.577533877,-2.507733117,-0.558880673,-0.496416217,-1.117460899,-1.070251877,0.808108116,0.794797533,1.400562672,-0.585097553,0.822029766,-1.123544694,-1.193014371,-1.018052161,-1.430806923,0.618484044,-1.71656224,-0.735042407,-2.153858476,-0.599932886,-1.498323204,1.061858581,-1.799782587,-1.722449877,-0.707627399,-0.9…
GO Process	GO:0060294	Cilium movement involved in cell motility	32	86	3.01401	top	2.03e-05	ks	STRG0A56FBJ.g10846.t1,STRG0A56FBJ.g10917.t1,STRG0A56FBJ.g10924.t1,STRG0A56FBJ.g1107.t1,STRG0A56FBJ.g11192.t1,STRG0A56FBJ.g1163.t1,STRG0A56FBJ.g11838.t1,STRG0A56FBJ.g14096.t1,STRG0A56FBJ.g14407.t1,STRG0A56FBJ.g14418.t1,STRG0A56FBJ.g14497.t1,STRG0A56FBJ.g14903.t1,STRG0A56FBJ.g15613.t1,STRG0A56FBJ.g15901.t1,STRG0A56FBJ.g15997.t1,STRG0A56FBJ.g3615.t1,STRG0A56FBJ.g4127.t1,STRG0A56FBJ.g4477.t1,STRG0A56…	g10846.t1,g10917.t1,g10924.t1,g1107.t1,g11192.t1,g1163.t1,g11838.t1,g14096.t1,g14407.t1,g14418.t1,g14497.t1,g14903.t1,g15613.t1,g15901.t1,g15997.t1,g3615.t1,g4127.t1,g4477.t1,g4478.t1,g4721.t1,g4791.t1,g5169.t1,g5208.t1,g5374.t1,g5404.t1,g5538.t1,g6145.t1,g6188.t1,g6569.t1,g7276.t1,g7532.t1,g8497.t1	g10846.t1,g10917.t1,g10924.t1,g1107.t1,g11192.t1,g1163.t1,g11838.t1,g14096.t1,g14407.t1,g14418.t1,g14497.t1,g14903.t1,g15613.t1,g15901.t1,g15997.t1,g3615.t1,g4127.t1,g4477.t1,g4478.t1,g4721.t1,g4791.t1,g5169.t1,g5208.t1,g5374.t1,g5404.t1,g5538.t1,g6145.t1,g6188.t1,g6569.t1,g7276.t1,g7532.t1,g8497.t1	-1.738312781,-2.043393813,-1.822056587,-1.290666174,-1.459083788,-3.157142953,0.904655247,-0.934510256,-4.29407144,-1.9227885,-0.679914888,-0.729194633,-1.657614944,-1.132956181,-1.763957211,-2.185771866,-2.270727405,-1.081526397,-1.660121552,-1.469284384,-0.967146033,-0.717229388,-1.443501782,-1.434516948,-1.459598006,-1.753789775,-3.531874245,-1.628302558,-2.029600795,-1.819704482,-1.099599309,…
GO Process	GO:0043632	Modification-dependent macromolecule catabolic process	49	368	2.29024	bottom	2.06e-05	ks	STRG0A56FBJ.g10310.t1,STRG0A56FBJ.g12552.t1,STRG0A56FBJ.g12683.t1,STRG0A56FBJ.g12895.t1,STRG0A56FBJ.g13343.t1,STRG0A56FBJ.g13459.t1,STRG0A56FBJ.g13460.t1,STRG0A56FBJ.g1394.t1,STRG0A56FBJ.g14156.t1,STRG0A56FBJ.g14221.t1,STRG0A56FBJ.g14262.t1,STRG0A56FBJ.g14870.t1,STRG0A56FBJ.g1510.t1,STRG0A56FBJ.g15170.t1,STRG0A56FBJ.g1559.t1,STRG0A56FBJ.g15900.t1,STRG0A56FBJ.g15904.t1,STRG0A56FBJ.g16154.t1,STRG0A…	g10310.t1,g12552.t1,g12683.t1,g12895.t1,g13343.t1,g13459.t1,g13460.t1,g1394.t1,g14156.t1,g14221.t1,g14262.t1,g14870.t1,g1510.t1,g15170.t1,g1559.t1,g15900.t1,g15904.t1,g16154.t1,g16314.t1,g16330.t1,g16382.t1,g2004.t1,g2007.t1,g2886.t1,g4284.t1,g4294.t1,g4505.t1,g5137.t1,g5366.t1,g5465.t1,g5541.t1,g5758.t1,g5777.t1,g6045.t1,g6170.t1,g6668.t1,g6746.t1,g6807.t1,g6842.t1,g6848.t1,g695.t1,g7242.t1,g744…	g10310.t1,g12552.t1,g12683.t1,g12895.t1,g13343.t1,g13459.t1,g13460.t1,g1394.t1,g14156.t1,g14221.t1,g14262.t1,g14870.t1,g1510.t1,g15170.t1,g1559.t1,g15900.t1,g15904.t1,g16154.t1,g16314.t1,g16330.t1,g16382.t1,g2004.t1,g2007.t1,g2886.t1,g4284.t1,g4294.t1,g4505.t1,g5137.t1,g5366.t1,g5465.t1,g5541.t1,g5758.t1,g5777.t1,g6045.t1,g6170.t1,g6668.t1,g6746.t1,g6807.t1,g6842.t1,g6848.t1,g695.t1,g7242.t1,g744…	2.007165407,0.570731486,0.860301544,1.165233075,1.096775086,1.102235089,0.805829882,0.832927726,0.728040913,1.277003378,0.996871352,-0.619959779,-0.644881443,1.171518274,1.203339787,0.785747421,1.078733911,1.301316917,1.018603077,0.659019212,1.959919797,1.023713969,1.070813282,1.564059394,1.150589001,0.747557182,-0.658541943,0.712143131,0.602846021,-1.572355532,-0.882270878,1.336477968,1.23726313…
GO Process	GO:0016570	Histone modification	33	229	3.71628	bottom	2.11e-05	ks	STRG0A56FBJ.g11122.t1,STRG0A56FBJ.g11369.t1,STRG0A56FBJ.g12187.t1,STRG0A56FBJ.g12513.t1,STRG0A56FBJ.g12928.t1,STRG0A56FBJ.g13279.t1,STRG0A56FBJ.g13554.t1,STRG0A56FBJ.g13973.t1,STRG0A56FBJ.g14143.t1,STRG0A56FBJ.g14160.t1,STRG0A56FBJ.g15242.t1,STRG0A56FBJ.g16459.t1,STRG0A56FBJ.g16703.t1,STRG0A56FBJ.g16812.t1,STRG0A56FBJ.g1775.t1,STRG0A56FBJ.g2489.t1,STRG0A56FBJ.g2775.t1,STRG0A56FBJ.g2843.t1,STRG0A5…	g11122.t1,g11369.t1,g12187.t1,g12513.t1,g12928.t1,g13279.t1,g13554.t1,g13973.t1,g14143.t1,g14160.t1,g15242.t1,g16459.t1,g16703.t1,g16812.t1,g1775.t1,g2489.t1,g2775.t1,g2843.t1,g3781.t1,g4505.t1,g5013.t1,g5710.t1,g5791.t1,g6024.t1,g6308.t1,g6345.t1,g7268.t1,g7330.t1,g7443.t1,g7631.t1,g8433.t1,g8750.t1,g9891.t1	g11122.t1,g11369.t1,g12187.t1,g12513.t1,g12928.t1,g13279.t1,g13554.t1,g13973.t1,g14143.t1,g14160.t1,g15242.t1,g16459.t1,g16703.t1,g16812.t1,g1775.t1,g2489.t1,g2775.t1,g2843.t1,g3781.t1,g4505.t1,g5013.t1,g5710.t1,g5791.t1,g6024.t1,g6308.t1,g6345.t1,g7268.t1,g7330.t1,g7443.t1,g7631.t1,g8433.t1,g8750.t1,g9891.t1	-1.277151728,1.07180322,1.274768331,0.728606639,1.400562672,2.9608896,1.322662897,0.89763724,1.249711279,1.410958354,1.836469269,1.475077877,1.854164198,1.084108836,-1.652727769,1.593126435,2.311159974,2.508444172,0.87878332,-0.658541943,1.809277871,0.750170095,2.035567487,1.071841893,1.375050899,1.195691954,1.517043867,1.42931143,0.853437961,1.693972121,1.839087915,1.047256745,1.000935899
GO Process	GO:0010629	Negative regulation of gene expression	60	388	2.57793	bottom	2.2e-05	ks	STRG0A56FBJ.g10978.t1,STRG0A56FBJ.g11285.t1,STRG0A56FBJ.g11626.t1,STRG0A56FBJ.g1165.t1,STRG0A56FBJ.g11926.t1,STRG0A56FBJ.g12779.t1,STRG0A56FBJ.g12904.t1,STRG0A56FBJ.g12914.t1,STRG0A56FBJ.g12948.t1,STRG0A56FBJ.g13260.t1,STRG0A56FBJ.g13279.t1,STRG0A56FBJ.g13806.t1,STRG0A56FBJ.g13929.t1,STRG0A56FBJ.g14118.t1,STRG0A56FBJ.g14125.t1,STRG0A56FBJ.g14163.t1,STRG0A56FBJ.g14243.t1,STRG0A56FBJ.g14268.t1,STRG…	g10978.t1,g11285.t1,g11626.t1,g1165.t1,g11926.t1,g12779.t1,g12904.t1,g12914.t1,g12948.t1,g13260.t1,g13279.t1,g13806.t1,g13929.t1,g14118.t1,g14125.t1,g14163.t1,g14243.t1,g14268.t1,g1441.t1,g14471.t1,g15033.t1,g15228.t1,g16382.t1,g16664.t1,g16882.t1,g1972.t1,g2157.t1,g2667.t1,g3026.t1,g3152.t1,g3466.t1,g3839.t1,g4610.t1,g5088.t1,g5290.t1,g5753.t1,g5773.t2,g5775.t1,g6024.t1,g6121.t1,g6147.t1,g6314.t…	g10978.t1,g11285.t1,g11626.t1,g1165.t1,g11926.t1,g12779.t1,g12904.t1,g12914.t1,g12948.t1,g13260.t1,g13279.t1,g13806.t1,g13929.t1,g14118.t1,g14125.t1,g14163.t1,g14243.t1,g14268.t1,g1441.t1,g14471.t1,g15033.t1,g15228.t1,g16382.t1,g16664.t1,g16882.t1,g1972.t1,g2157.t1,g2667.t1,g3026.t1,g3152.t1,g3466.t1,g3839.t1,g4610.t1,g5088.t1,g5290.t1,g5753.t1,g5773.t2,g5775.t1,g6024.t1,g6121.t1,g6147.t1,g6314.t…	-1.79462914,0.772037949,1.323694824,1.607019364,1.048116873,1.60224546,1.154561674,1.186783884,-1.69738072,1.535837816,2.9608896,0.741590607,1.370464581,1.072258989,3.057315031,-1.726925587,1.524443724,1.171657699,1.377012035,1.150842856,1.162423469,1.132724558,1.959919797,-2.180683348,0.899961293,-1.824851009,-1.339020965,1.247370659,0.95385127,0.893928334,-1.610684843,0.565468887,-2.340847857,1…
GO Process	GO:0000470	Maturation of LSU-rRNA	12	26	5.21959	bottom	2.23e-05	afc	STRG0A56FBJ.g13127.t1,STRG0A56FBJ.g13403.t1,STRG0A56FBJ.g15032.t1,STRG0A56FBJ.g3054.t1,STRG0A56FBJ.g3860.t1,STRG0A56FBJ.g4790.t1,STRG0A56FBJ.g6314.t1,STRG0A56FBJ.g6819.t1,STRG0A56FBJ.g6895.t1,STRG0A56FBJ.g7992.t1,STRG0A56FBJ.g8646.t1,STRG0A56FBJ.g9010.t1	g13127.t1,g13403.t1,g15032.t1,g3054.t1,g3860.t1,g4790.t1,g6314.t1,g6819.t1,g6895.t1,g7992.t1,g8646.t1,g9010.t1	g13127.t1,g13403.t1,g15032.t1,g3054.t1,g3860.t1,g4790.t1,g6314.t1,g6819.t1,g6895.t1,g7992.t1,g8646.t1,g9010.t1	1.027408517,2.214116895,1.524786913,1.291321052,1.206235662,1.409661795,1.154708524,2.884532399,1.947776396,2.233619539,1.972004404,2.190687016
GO Process	GO:0001578	Microtubule bundle formation	47	88	2.04354	top	2.23e-05	ks	STRG0A56FBJ.g10924.t1,STRG0A56FBJ.g11123.t1,STRG0A56FBJ.g11192.t1,STRG0A56FBJ.g1163.t1,STRG0A56FBJ.g11669.t1,STRG0A56FBJ.g11914.t1,STRG0A56FBJ.g1274.t1,STRG0A56FBJ.g13780.t1,STRG0A56FBJ.g14096.t1,STRG0A56FBJ.g14261.t1,STRG0A56FBJ.g14418.t1,STRG0A56FBJ.g14423.t1,STRG0A56FBJ.g14497.t1,STRG0A56FBJ.g14903.t1,STRG0A56FBJ.g15386.t1,STRG0A56FBJ.g15901.t1,STRG0A56FBJ.g15997.t1,STRG0A56FBJ.g16005.t1,STRG0…	g10924.t1,g11123.t1,g11192.t1,g1163.t1,g11669.t1,g11914.t1,g1274.t1,g13780.t1,g14096.t1,g14261.t1,g14418.t1,g14423.t1,g14497.t1,g14903.t1,g15386.t1,g15901.t1,g15997.t1,g16005.t1,g16923.t1,g1936.t1,g1987.t1,g2962.t1,g2963.t1,g3494.t1,g3615.t1,g3729.t1,g4109.t1,g4477.t1,g4478.t1,g4721.t1,g4791.t1,g5092.t1,g5208.t1,g5374.t1,g5431.t1,g5538.t1,g5641.t1,g5835.t1,g5992.t1,g6104.t1,g6188.t1,g6546.t1,g656…	g10924.t1,g11123.t1,g11192.t1,g1163.t1,g11669.t1,g11914.t1,g1274.t1,g13780.t1,g14096.t1,g14261.t1,g14418.t1,g14423.t1,g14497.t1,g14903.t1,g15386.t1,g15901.t1,g15997.t1,g16005.t1,g16923.t1,g1936.t1,g1987.t1,g2962.t1,g2963.t1,g3494.t1,g3615.t1,g3729.t1,g4109.t1,g4477.t1,g4478.t1,g4721.t1,g4791.t1,g5092.t1,g5208.t1,g5374.t1,g5431.t1,g5538.t1,g5641.t1,g5835.t1,g5992.t1,g6104.t1,g6188.t1,g6546.t1,g656…	-1.822056587,-1.699788862,-1.459083788,-3.157142953,-2.031043502,-1.526120692,0.952117724,-1.772271559,-0.934510256,1.144245903,-1.9227885,-1.211608658,-0.679914888,-0.729194633,0.919143652,-1.132956181,-1.763957211,-0.945953705,1.452528103,-1.798760085,-1.463184988,-2.147871691,-1.406934044,-2.024438995,-2.185771866,-0.938955922,0.855078437,-1.081526397,-1.660121552,-1.469284384,-0.967146033,-1.…
GO Process	GO:0006511	Ubiquitin-dependent protein catabolic process	45	347	2.22228	bottom	2.25e-05	ks	STRG0A56FBJ.g10310.t1,STRG0A56FBJ.g12552.t1,STRG0A56FBJ.g12683.t1,STRG0A56FBJ.g12895.t1,STRG0A56FBJ.g13343.t1,STRG0A56FBJ.g13459.t1,STRG0A56FBJ.g13460.t1,STRG0A56FBJ.g1394.t1,STRG0A56FBJ.g14156.t1,STRG0A56FBJ.g14221.t1,STRG0A56FBJ.g14262.t1,STRG0A56FBJ.g14870.t1,STRG0A56FBJ.g1510.t1,STRG0A56FBJ.g15170.t1,STRG0A56FBJ.g1559.t1,STRG0A56FBJ.g15900.t1,STRG0A56FBJ.g15904.t1,STRG0A56FBJ.g16154.t1,STRG0A…	g10310.t1,g12552.t1,g12683.t1,g12895.t1,g13343.t1,g13459.t1,g13460.t1,g1394.t1,g14156.t1,g14221.t1,g14262.t1,g14870.t1,g1510.t1,g15170.t1,g1559.t1,g15900.t1,g15904.t1,g16154.t1,g16314.t1,g16330.t1,g2004.t1,g2007.t1,g2886.t1,g4284.t1,g4294.t1,g4505.t1,g5137.t1,g5366.t1,g5465.t1,g5541.t1,g5758.t1,g5777.t1,g6045.t1,g6170.t1,g6668.t1,g6746.t1,g6842.t1,g6848.t1,g695.t1,g7242.t1,g7443.t1,g7452.t1,g7940…	g10310.t1,g12552.t1,g12683.t1,g12895.t1,g13343.t1,g13459.t1,g13460.t1,g1394.t1,g14156.t1,g14221.t1,g14262.t1,g14870.t1,g1510.t1,g15170.t1,g1559.t1,g15900.t1,g15904.t1,g16154.t1,g16314.t1,g16330.t1,g2004.t1,g2007.t1,g2886.t1,g4284.t1,g4294.t1,g4505.t1,g5137.t1,g5366.t1,g5465.t1,g5541.t1,g5758.t1,g5777.t1,g6045.t1,g6170.t1,g6668.t1,g6746.t1,g6842.t1,g6848.t1,g695.t1,g7242.t1,g7443.t1,g7452.t1,g7940…	2.007165407,0.570731486,0.860301544,1.165233075,1.096775086,1.102235089,0.805829882,0.832927726,0.728040913,1.277003378,0.996871352,-0.619959779,-0.644881443,1.171518274,1.203339787,0.785747421,1.078733911,1.301316917,1.018603077,0.659019212,1.023713969,1.070813282,1.564059394,1.150589001,0.747557182,-0.658541943,0.712143131,0.602846021,-1.572355532,-0.882270878,1.336477968,1.237263135,0.84472015…
GO Process	GO:0000027	Ribosomal large subunit assembly	10	24	5.58446	bottom	2.43e-05	afc	STRG0A56FBJ.g13403.t1,STRG0A56FBJ.g14125.t1,STRG0A56FBJ.g17001.t1,STRG0A56FBJ.g3054.t1,STRG0A56FBJ.g3296.t1,STRG0A56FBJ.g5233.t1,STRG0A56FBJ.g5658.t1,STRG0A56FBJ.g7553.t1,STRG0A56FBJ.g8947.t1,STRG0A56FBJ.g9322.t1	g13403.t1,g14125.t1,g17001.t1,g3054.t1,g3296.t1,g5233.t1,g5658.t1,g7553.t1,g8947.t1,g9322.t1	g13403.t1,g14125.t1,g17001.t1,g3054.t1,g3296.t1,g5233.t1,g5658.t1,g7553.t1,g8947.t1,g9322.t1	2.214116895,3.057315031,1.723532574,1.291321052,2.124746259,1.477380419,1.224197699,1.423745735,2.502462709,1.832104044
GO Process	GO:0000724	Double-strand break repair via homologous recombination	12	72	3.06814	both ends	2.73e-05	afc	STRG0A56FBJ.g10956.t1,STRG0A56FBJ.g11149.t1,STRG0A56FBJ.g12939.t1,STRG0A56FBJ.g13567.t1,STRG0A56FBJ.g15498.t1,STRG0A56FBJ.g16515.t1,STRG0A56FBJ.g2535.t1,STRG0A56FBJ.g3823.t1,STRG0A56FBJ.g5003.t1,STRG0A56FBJ.g6848.t1,STRG0A56FBJ.g7006.t1,STRG0A56FBJ.g8245.t1	g10956.t1,g11149.t1,g12939.t1,g13567.t1,g15498.t1,g16515.t1,g2535.t1,g3823.t1,g5003.t1,g6848.t1,g7006.t1,g8245.t1	g10956.t1,g11149.t1,g12939.t1,g13567.t1,g15498.t1,g16515.t1,g2535.t1,g3823.t1,g5003.t1,g6848.t1,g7006.t1,g8245.t1	1.294215006,-2.516745613,1.946426853,-2.400641123,2.583958876,3.198996552,3.100627509,2.905608074,2.572178959,1.070715429,2.348747702,2.96905522
GO Process	GO:0006631	Fatty acid metabolic process	59	337	1.97812	top	2.73e-05	ks	STRG0A56FBJ.g10290.t1,STRG0A56FBJ.g10703.t1,STRG0A56FBJ.g10833.t1,STRG0A56FBJ.g11126.t1,STRG0A56FBJ.g11538.t1,STRG0A56FBJ.g11541.t1,STRG0A56FBJ.g11543.t1,STRG0A56FBJ.g11588.t1,STRG0A56FBJ.g11601.t1,STRG0A56FBJ.g11947.t1,STRG0A56FBJ.g12080.t1,STRG0A56FBJ.g12096.t1,STRG0A56FBJ.g12333.t1,STRG0A56FBJ.g12334.t1,STRG0A56FBJ.g12540.t1,STRG0A56FBJ.g12552.t1,STRG0A56FBJ.g12948.t1,STRG0A56FBJ.g13138.t1,STR…	g10290.t1,g10703.t1,g10833.t1,g11126.t1,g11538.t1,g11541.t1,g11543.t1,g11588.t1,g11601.t1,g11947.t1,g12080.t1,g12096.t1,g12333.t1,g12334.t1,g12540.t1,g12552.t1,g12948.t1,g13138.t1,g13232.t1,g13677.t1,g14050.t1,g14236.t1,g14406.t1,g14462.t1,g15058.t1,g15467.t1,g15607.t1,g15687.t1,g15689.t1,g16440.t1,g16441.t1,g16461.t1,g16652.t1,g1706.t1,g2134.t1,g2252.t1,g2342.t1,g3828.t1,g3854.t1,g3856.t1,g4703.…	g10290.t1,g10703.t1,g10833.t1,g11126.t1,g11538.t1,g11541.t1,g11543.t1,g11588.t1,g11601.t1,g11947.t1,g12080.t1,g12096.t1,g12333.t1,g12334.t1,g12540.t1,g12552.t1,g12948.t1,g13138.t1,g13232.t1,g13677.t1,g14050.t1,g14236.t1,g14406.t1,g14462.t1,g15058.t1,g15467.t1,g15607.t1,g15687.t1,g15689.t1,g16440.t1,g16441.t1,g16461.t1,g16652.t1,g1706.t1,g2134.t1,g2252.t1,g2342.t1,g3828.t1,g3854.t1,g3856.t1,g4703.…	-0.769387904,-1.622559879,-1.2972136,-0.871471982,-1.305824839,-2.409930835,-2.283875353,-1.674451582,-1.976102221,1.82203744,-1.983173447,-1.143696305,-1.392196703,-2.238113402,-0.954691762,0.570731486,-1.69738072,1.674839412,-1.600701384,-1.725429596,-0.603196985,-1.718221854,-2.519233849,-1.612924617,-0.907349351,-0.488832176,0.837983505,-2.166546217,-1.268511085,-2.253090461,-1.936063544,-2.4…
GO Process	GO:0031497	Chromatin assembly	14	69	4.88201	bottom	2.73e-05	afc	STRG0A56FBJ.g13279.t1,STRG0A56FBJ.g13480.t1,STRG0A56FBJ.g13823.t1,STRG0A56FBJ.g14053.t1,STRG0A56FBJ.g2291.t1,STRG0A56FBJ.g3271.t1,STRG0A56FBJ.g5489.t1,STRG0A56FBJ.g6024.t1,STRG0A56FBJ.g6147.t1,STRG0A56FBJ.g6221.t1,STRG0A56FBJ.g7531.t1,STRG0A56FBJ.g8245.t1,STRG0A56FBJ.g8924.t1,STRG0A56FBJ.g992.t1	g13279.t1,g13480.t1,g13823.t1,g14053.t1,g2291.t1,g3271.t1,g5489.t1,g6024.t1,g6147.t1,g6221.t1,g7531.t1,g8245.t1,g8924.t1,g992.t1	g13279.t1,g13480.t1,g13823.t1,g14053.t1,g2291.t1,g3271.t1,g5489.t1,g6024.t1,g6147.t1,g6221.t1,g7531.t1,g8245.t1,g8924.t1,g992.t1	2.9608896,1.083975433,1.181457299,1.403403191,1.180377591,2.204611404,2.66807874,1.071841893,-1.066926708,2.150819301,1.998676726,2.96905522,1.051253324,1.991254838
GO Process	GO:0030036	Actin cytoskeleton organization	45	297	1.38571	top	2.82e-05	ks	STRG0A56FBJ.g10320.t1,STRG0A56FBJ.g10731.t1,STRG0A56FBJ.g11147.t1,STRG0A56FBJ.g11151.t1,STRG0A56FBJ.g11675.t1,STRG0A56FBJ.g11687.t1,STRG0A56FBJ.g11714.t1,STRG0A56FBJ.g11722.t1,STRG0A56FBJ.g12513.t1,STRG0A56FBJ.g12792.t1,STRG0A56FBJ.g13046.t1,STRG0A56FBJ.g13319.t1,STRG0A56FBJ.g13390.t1,STRG0A56FBJ.g14255.t1,STRG0A56FBJ.g15258.t1,STRG0A56FBJ.g15776.t1,STRG0A56FBJ.g15777.t1,STRG0A56FBJ.g15778.t1,STR…	g10320.t1,g10731.t1,g11147.t1,g11151.t1,g11675.t1,g11687.t1,g11714.t1,g11722.t1,g12513.t1,g12792.t1,g13046.t1,g13319.t1,g13390.t1,g14255.t1,g15258.t1,g15776.t1,g15777.t1,g15778.t1,g16456.t1,g17017.t1,g1786.t1,g1970.t1,g2923.t1,g2947.t1,g3399.t1,g3466.t1,g3508.t1,g4454.t1,g448.t1,g4992.t1,g5028.t1,g5212.t1,g5366.t1,g5730.t1,g5733.t1,g5863.t1,g6486.t1,g6547.t1,g6630.t1,g6665.t1,g6799.t1,g685.t1,g71…	g10320.t1,g10731.t1,g11147.t1,g11151.t1,g11675.t1,g11687.t1,g11714.t1,g11722.t1,g12513.t1,g12792.t1,g13046.t1,g13319.t1,g13390.t1,g14255.t1,g15258.t1,g15776.t1,g15777.t1,g15778.t1,g16456.t1,g17017.t1,g1786.t1,g1970.t1,g2923.t1,g2947.t1,g3399.t1,g3466.t1,g3508.t1,g4454.t1,g448.t1,g4992.t1,g5028.t1,g5212.t1,g5366.t1,g5730.t1,g5733.t1,g5863.t1,g6486.t1,g6547.t1,g6630.t1,g6665.t1,g6799.t1,g685.t1,g71…	-1.70176532,-1.220928341,-0.975709064,0.667149877,-0.941109181,-0.870260402,0.689803233,-1.127746704,0.728606639,-1.140978863,-1.012870911,-1.071236335,-0.56891928,-0.775988852,-0.977000462,-1.472710602,-0.499906811,-0.570766721,-0.536542184,-1.171609195,-0.735907999,-1.816120671,-1.235571717,-0.692727042,-1.075779746,-1.610684843,-1.645874695,-0.709428932,-1.9879967,-1.69090831,1.348947025,-1.07…
GO Process	GO:0045893	Positive regulation of transcription, DNA-templated	75	656	1.96385	bottom	3.27e-05	ks	STRG0A56FBJ.g10334.t1,STRG0A56FBJ.g10725.t1,STRG0A56FBJ.g109.t1,STRG0A56FBJ.g11151.t1,STRG0A56FBJ.g11369.t1,STRG0A56FBJ.g11450.t1,STRG0A56FBJ.g11776.t1,STRG0A56FBJ.g11879.t1,STRG0A56FBJ.g1206.t1,STRG0A56FBJ.g12187.t1,STRG0A56FBJ.g12513.t1,STRG0A56FBJ.g12575.t1,STRG0A56FBJ.g12837.t1,STRG0A56FBJ.g13247.t1,STRG0A56FBJ.g13250.t1,STRG0A56FBJ.g13267.t1,STRG0A56FBJ.g13390.t1,STRG0A56FBJ.g13705.t1,STRG0A…	g10334.t1,g10725.t1,g109.t1,g11151.t1,g11369.t1,g11450.t1,g11776.t1,g11879.t1,g1206.t1,g12187.t1,g12513.t1,g12575.t1,g12837.t1,g13247.t1,g13250.t1,g13267.t1,g13390.t1,g13705.t1,g14143.t1,g14346.t1,g14992.t1,g14993.t1,g15058.t1,g15777.t1,g15778.t1,g15821.t1,g15828.t1,g15904.t1,g1613.t1,g16595.t1,g16683.t1,g16703.t1,g17013.t1,g1775.t1,g2095.t1,g2175.t1,g2270.t1,g2489.t1,g2502.t1,g2708.t1,g2780.t1,g…	g10334.t1,g10725.t1,g109.t1,g11151.t1,g11369.t1,g11450.t1,g11776.t1,g11879.t1,g1206.t1,g12187.t1,g12513.t1,g12575.t1,g12837.t1,g13247.t1,g13250.t1,g13267.t1,g13390.t1,g13705.t1,g14143.t1,g14346.t1,g14992.t1,g14993.t1,g15058.t1,g15777.t1,g15778.t1,g15821.t1,g15828.t1,g15904.t1,g1613.t1,g16595.t1,g16683.t1,g16703.t1,g17013.t1,g1775.t1,g2095.t1,g2175.t1,g2270.t1,g2489.t1,g2502.t1,g2708.t1,g2780.t1,g…	0.980851571,1.219714482,0.979392542,0.667149877,1.07180322,1.250435787,1.470531856,0.886978057,0.896245211,1.274768331,0.728606639,2.645434198,1.198708879,-0.962807666,1.420357293,0.866781681,-0.56891928,0.797574806,1.249711279,0.932890417,0.980139671,0.871068579,-0.907349351,-0.499906811,-0.570766721,-1.099318525,-0.605570412,1.078733911,-1.680504699,0.729218637,-1.705436711,1.854164198,-2.24889…
GO Process	GO:0015849	Organic acid transport	23	265	2.98573	top	3.38e-05	ks	STRG0A56FBJ.g10239.t1,STRG0A56FBJ.g11987.t1,STRG0A56FBJ.g12080.t1,STRG0A56FBJ.g12096.t1,STRG0A56FBJ.g12164.t1,STRG0A56FBJ.g12170.t1,STRG0A56FBJ.g12948.t1,STRG0A56FBJ.g13232.t1,STRG0A56FBJ.g14178.t1,STRG0A56FBJ.g14677.t1,STRG0A56FBJ.g15887.t1,STRG0A56FBJ.g16100.t1,STRG0A56FBJ.g16467.t1,STRG0A56FBJ.g16468.t1,STRG0A56FBJ.g1742.t1,STRG0A56FBJ.g2113.t1,STRG0A56FBJ.g3849.t1,STRG0A56FBJ.g6549.t1,STRG0A5…	g10239.t1,g11987.t1,g12080.t1,g12096.t1,g12164.t1,g12170.t1,g12948.t1,g13232.t1,g14178.t1,g14677.t1,g15887.t1,g16100.t1,g16467.t1,g16468.t1,g1742.t1,g2113.t1,g3849.t1,g6549.t1,g6737.t1,g7928.t1,g8541.t1,g8542.t1,g9251.t1	g10239.t1,g11987.t1,g12080.t1,g12096.t1,g12164.t1,g12170.t1,g12948.t1,g13232.t1,g14178.t1,g14677.t1,g15887.t1,g16100.t1,g16467.t1,g16468.t1,g1742.t1,g2113.t1,g3849.t1,g6549.t1,g6737.t1,g7928.t1,g8541.t1,g8542.t1,g9251.t1	-1.287233032,-1.357705498,-1.983173447,-1.143696305,-2.975742936,-3.214961242,-1.69738072,-1.600701384,-2.989420966,-1.55881541,-1.234696136,-2.530509893,-1.85403163,-2.114422683,-1.637874353,-1.202819241,-1.834398661,-1.074903502,-1.82825595,-0.639183153,-1.794909836,-1.658871611,1.20385904
GO Process	GO:0006357	Regulation of transcription by RNA polymerase II	78	998	2.12576	bottom	3.44e-05	ks	STRG0A56FBJ.g10334.t1,STRG0A56FBJ.g109.t1,STRG0A56FBJ.g10948.t1,STRG0A56FBJ.g11151.t1,STRG0A56FBJ.g11776.t1,STRG0A56FBJ.g11879.t1,STRG0A56FBJ.g12187.t1,STRG0A56FBJ.g12513.t1,STRG0A56FBJ.g12575.t1,STRG0A56FBJ.g12837.t1,STRG0A56FBJ.g12958.t1,STRG0A56FBJ.g13250.t1,STRG0A56FBJ.g13267.t1,STRG0A56FBJ.g13390.t1,STRG0A56FBJ.g13705.t1,STRG0A56FBJ.g14143.t1,STRG0A56FBJ.g14268.t1,STRG0A56FBJ.g14346.t1,STRG0…	g10334.t1,g109.t1,g10948.t1,g11151.t1,g11776.t1,g11879.t1,g12187.t1,g12513.t1,g12575.t1,g12837.t1,g12958.t1,g13250.t1,g13267.t1,g13390.t1,g13705.t1,g14143.t1,g14268.t1,g14346.t1,g14821.t1,g1495.t1,g1496.t1,g14992.t1,g15033.t1,g15058.t1,g15207.t1,g15242.t1,g15361.t1,g15821.t1,g15828.t1,g15904.t1,g1613.t1,g16327.t1,g16459.t1,g16683.t1,g16703.t1,g16726.t1,g2175.t1,g2232.t1,g2489.t1,g2933.t1,g2947.t1…	g10334.t1,g109.t1,g10948.t1,g11151.t1,g11776.t1,g11879.t1,g12187.t1,g12513.t1,g12575.t1,g12837.t1,g12958.t1,g13250.t1,g13267.t1,g13390.t1,g13705.t1,g14143.t1,g14268.t1,g14346.t1,g14821.t1,g1495.t1,g1496.t1,g14992.t1,g15033.t1,g15058.t1,g15207.t1,g15242.t1,g15361.t1,g15821.t1,g15828.t1,g15904.t1,g1613.t1,g16327.t1,g16459.t1,g16683.t1,g16703.t1,g16726.t1,g2175.t1,g2232.t1,g2489.t1,g2933.t1,g2947.t1…	0.980851571,0.979392542,1.830854422,0.667149877,1.470531856,0.886978057,1.274768331,0.728606639,2.645434198,1.198708879,1.163260983,1.420357293,0.866781681,-0.56891928,0.797574806,1.249711279,1.171657699,0.932890417,1.359583046,-2.768579105,-2.318726146,0.980139671,1.162423469,-0.907349351,1.349299699,1.836469269,1.05637019,-1.099318525,-0.605570412,1.078733911,-1.680504699,1.026073633,1.47507787…
GO Process	GO:0006811	Ion transport	42	979	2.27631	top	3.44e-05	ks	STRG0A56FBJ.g10239.t1,STRG0A56FBJ.g10978.t1,STRG0A56FBJ.g11286.t1,STRG0A56FBJ.g11860.t1,STRG0A56FBJ.g11909.t1,STRG0A56FBJ.g11987.t1,STRG0A56FBJ.g12480.t1,STRG0A56FBJ.g12686.t1,STRG0A56FBJ.g12776.t1,STRG0A56FBJ.g12956.t1,STRG0A56FBJ.g13232.t1,STRG0A56FBJ.g14178.t1,STRG0A56FBJ.g14231.t1,STRG0A56FBJ.g14677.t1,STRG0A56FBJ.g15487.t1,STRG0A56FBJ.g15887.t1,STRG0A56FBJ.g16329.t1,STRG0A56FBJ.g16791.t1,STR…	g10239.t1,g10978.t1,g11286.t1,g11860.t1,g11909.t1,g11987.t1,g12480.t1,g12686.t1,g12776.t1,g12956.t1,g13232.t1,g14178.t1,g14231.t1,g14677.t1,g15487.t1,g15887.t1,g16329.t1,g16791.t1,g1742.t1,g2113.t1,g2322.t1,g2416.t1,g2573.t1,g2628.t1,g2682.t1,g3308.t1,g4106.t1,g4417.t1,g4878.t1,g5512.t1,g6061.t1,g6908.t1,g6981.t1,g7188.t1,g7313.t1,g7599.t1,g7642.t1,g7928.t1,g8317.t1,g8489.t1,g9214.t1,g9251.t1	g10239.t1,g10978.t1,g11286.t1,g11860.t1,g11909.t1,g11987.t1,g12480.t1,g12686.t1,g12776.t1,g12956.t1,g13232.t1,g14178.t1,g14231.t1,g14677.t1,g15487.t1,g15887.t1,g16329.t1,g16791.t1,g1742.t1,g2113.t1,g2322.t1,g2416.t1,g2573.t1,g2628.t1,g2682.t1,g3308.t1,g4106.t1,g4417.t1,g4878.t1,g5512.t1,g6061.t1,g6908.t1,g6981.t1,g7188.t1,g7313.t1,g7599.t1,g7642.t1,g7928.t1,g8317.t1,g8489.t1,g9214.t1,g9251.t1	-1.287233032,-1.79462914,-0.733803761,-1.582309072,-3.137446324,-1.357705498,-2.28003569,-1.487429083,-0.776943094,-1.219385603,-1.600701384,-2.989420966,-1.675223671,-1.55881541,-2.744545311,-1.234696136,-1.50761623,-0.742556223,-1.637874353,-1.202819241,-0.713477866,-0.947345955,-2.429767338,-1.623014387,-1.187949239,-1.356553933,-1.182175472,1.116722362,-1.965130213,0.892682915,1.029515151,-1.…
GO Process	GO:0042255	Ribosome assembly	20	53	4.16508	bottom	3.8e-05	afc	STRG0A56FBJ.g11663.t1,STRG0A56FBJ.g12100.t1,STRG0A56FBJ.g13403.t1,STRG0A56FBJ.g13787.t1,STRG0A56FBJ.g14125.t1,STRG0A56FBJ.g14268.t1,STRG0A56FBJ.g14697.t1,STRG0A56FBJ.g17001.t1,STRG0A56FBJ.g1838.t1,STRG0A56FBJ.g2078.t1,STRG0A56FBJ.g3054.t1,STRG0A56FBJ.g3296.t1,STRG0A56FBJ.g5233.t1,STRG0A56FBJ.g5658.t1,STRG0A56FBJ.g6314.t1,STRG0A56FBJ.g7332.t1,STRG0A56FBJ.g7553.t1,STRG0A56FBJ.g8947.t1,STRG0A56FBJ.g…	g11663.t1,g12100.t1,g13403.t1,g13787.t1,g14125.t1,g14268.t1,g14697.t1,g17001.t1,g1838.t1,g2078.t1,g3054.t1,g3296.t1,g5233.t1,g5658.t1,g6314.t1,g7332.t1,g7553.t1,g8947.t1,g9322.t1,g9850.t1	g11663.t1,g12100.t1,g13403.t1,g13787.t1,g14125.t1,g14268.t1,g14697.t1,g17001.t1,g1838.t1,g2078.t1,g3054.t1,g3296.t1,g5233.t1,g5658.t1,g6314.t1,g7332.t1,g7553.t1,g8947.t1,g9322.t1,g9850.t1	0.984807174,1.287950954,2.214116895,1.355900429,3.057315031,1.171657699,1.401597345,1.723532574,0.809721044,1.5454733,1.291321052,2.124746259,1.477380419,1.224197699,1.154708524,-2.552743157,1.423745735,2.502462709,1.832104044,1.403844047
GO Process	GO:0034654	Nucleobase-containing compound biosynthetic process	77	453	2.46856	bottom	3.92e-05	ks	STRG0A56FBJ.g10552.t1,STRG0A56FBJ.g10758.t1,STRG0A56FBJ.g10767.t1,STRG0A56FBJ.g11427.t1,STRG0A56FBJ.g11760.t1,STRG0A56FBJ.g11794.t1,STRG0A56FBJ.g11962.t1,STRG0A56FBJ.g11999.t1,STRG0A56FBJ.g1206.t1,STRG0A56FBJ.g12187.t1,STRG0A56FBJ.g12810.t1,STRG0A56FBJ.g12813.t1,STRG0A56FBJ.g13284.t1,STRG0A56FBJ.g13398.t1,STRG0A56FBJ.g13564.t1,STRG0A56FBJ.g13973.t1,STRG0A56FBJ.g14143.t1,STRG0A56FBJ.g14176.t1,STRG…	g10552.t1,g10758.t1,g10767.t1,g11427.t1,g11760.t1,g11794.t1,g11962.t1,g11999.t1,g1206.t1,g12187.t1,g12810.t1,g12813.t1,g13284.t1,g13398.t1,g13564.t1,g13973.t1,g14143.t1,g14176.t1,g14365.t1,g14886.t1,g14981.t1,g15022.t1,g15388.t1,g15496.t1,g16104.t1,g1628.t1,g1641.t1,g16589.t1,g16597.t1,g1995.t1,g2175.t1,g22.t1,g22.t2,g2535.t1,g2794.t1,g2810.t1,g2869.t1,g2968.t1,g3347.t1,g3530.t1,g4234.t1,g432.t1,…	g10552.t1,g10758.t1,g10767.t1,g11427.t1,g11760.t1,g11794.t1,g11962.t1,g11999.t1,g1206.t1,g12187.t1,g12810.t1,g12813.t1,g13284.t1,g13398.t1,g13564.t1,g13973.t1,g14143.t1,g14176.t1,g14365.t1,g14886.t1,g14981.t1,g15022.t1,g15388.t1,g15496.t1,g16104.t1,g1628.t1,g1641.t1,g16589.t1,g16597.t1,g1995.t1,g2175.t1,g22.t1,g22.t2,g2535.t1,g2794.t1,g2810.t1,g2869.t1,g2968.t1,g3347.t1,g3530.t1,g4234.t1,g432.t1,…	1.798344637,-1.275611172,-1.728501851,-1.548932509,2.803416794,-1.476143824,-1.144588371,0.877772701,0.896245211,1.274768331,0.746691933,3.136441327,0.993408531,1.171325089,1.623357739,0.89763724,1.249711279,3.001770209,0.592831433,0.737221712,0.863436214,-0.77639797,-1.569593078,1.000409815,-3.170054807,1.533259053,1.739105484,1.403778701,1.457256998,-1.631858127,0.942603195,1.791198226,1.880437…
GO Process	GO:0006302	Double-strand break repair	19	134	4.2289	bottom	4.7e-05	afc	STRG0A56FBJ.g10285.t1,STRG0A56FBJ.g10956.t1,STRG0A56FBJ.g11149.t1,STRG0A56FBJ.g12837.t1,STRG0A56FBJ.g12939.t1,STRG0A56FBJ.g13564.t1,STRG0A56FBJ.g13567.t1,STRG0A56FBJ.g15498.t1,STRG0A56FBJ.g16515.t1,STRG0A56FBJ.g1838.t1,STRG0A56FBJ.g2520.t1,STRG0A56FBJ.g2535.t1,STRG0A56FBJ.g3823.t1,STRG0A56FBJ.g5003.t1,STRG0A56FBJ.g6652.t1,STRG0A56FBJ.g6848.t1,STRG0A56FBJ.g7006.t1,STRG0A56FBJ.g8245.t1,STRG0A56FBJ.…	g10285.t1,g10956.t1,g11149.t1,g12837.t1,g12939.t1,g13564.t1,g13567.t1,g15498.t1,g16515.t1,g1838.t1,g2520.t1,g2535.t1,g3823.t1,g5003.t1,g6652.t1,g6848.t1,g7006.t1,g8245.t1,g8852.t1	g10285.t1,g10956.t1,g11149.t1,g12837.t1,g12939.t1,g13564.t1,g13567.t1,g15498.t1,g16515.t1,g1838.t1,g2520.t1,g2535.t1,g3823.t1,g5003.t1,g6652.t1,g6848.t1,g7006.t1,g8245.t1,g8852.t1	0.726460094,1.294215006,-2.516745613,1.198708879,1.946426853,1.623357739,-2.400641123,2.583958876,3.198996552,0.809721044,0.996657562,3.100627509,2.905608074,2.572178959,1.07669455,1.070715429,2.348747702,2.96905522,0.995346924
GO Process	GO:1902969	Mitotic DNA replication	5	11	7.02389	bottom	6.18e-05	afc	STRG0A56FBJ.g12939.t1,STRG0A56FBJ.g16515.t1,STRG0A56FBJ.g6159.t1,STRG0A56FBJ.g7006.t1,STRG0A56FBJ.g8245.t1	g12939.t1,g16515.t1,g6159.t1,g7006.t1,g8245.t1	g12939.t1,g16515.t1,g6159.t1,g7006.t1,g8245.t1	1.946426853,3.198996552,1.583158939,2.348747702,2.96905522
GO Process	GO:0019941	Modification-dependent protein catabolic process	46	360	2.13203	bottom	6.23e-05	ks	STRG0A56FBJ.g10310.t1,STRG0A56FBJ.g12552.t1,STRG0A56FBJ.g12683.t1,STRG0A56FBJ.g12895.t1,STRG0A56FBJ.g13343.t1,STRG0A56FBJ.g13459.t1,STRG0A56FBJ.g13460.t1,STRG0A56FBJ.g1394.t1,STRG0A56FBJ.g14156.t1,STRG0A56FBJ.g14221.t1,STRG0A56FBJ.g14262.t1,STRG0A56FBJ.g14870.t1,STRG0A56FBJ.g1510.t1,STRG0A56FBJ.g15170.t1,STRG0A56FBJ.g1559.t1,STRG0A56FBJ.g15900.t1,STRG0A56FBJ.g15904.t1,STRG0A56FBJ.g16154.t1,STRG0A…	g10310.t1,g12552.t1,g12683.t1,g12895.t1,g13343.t1,g13459.t1,g13460.t1,g1394.t1,g14156.t1,g14221.t1,g14262.t1,g14870.t1,g1510.t1,g15170.t1,g1559.t1,g15900.t1,g15904.t1,g16154.t1,g16314.t1,g16330.t1,g2004.t1,g2007.t1,g2886.t1,g4284.t1,g4294.t1,g4505.t1,g5137.t1,g5366.t1,g5465.t1,g5541.t1,g5758.t1,g5777.t1,g6045.t1,g6170.t1,g6668.t1,g6746.t1,g6807.t1,g6842.t1,g6848.t1,g695.t1,g7242.t1,g7443.t1,g7452…	g10310.t1,g12552.t1,g12683.t1,g12895.t1,g13343.t1,g13459.t1,g13460.t1,g1394.t1,g14156.t1,g14221.t1,g14262.t1,g14870.t1,g1510.t1,g15170.t1,g1559.t1,g15900.t1,g15904.t1,g16154.t1,g16314.t1,g16330.t1,g2004.t1,g2007.t1,g2886.t1,g4284.t1,g4294.t1,g4505.t1,g5137.t1,g5366.t1,g5465.t1,g5541.t1,g5758.t1,g5777.t1,g6045.t1,g6170.t1,g6668.t1,g6746.t1,g6807.t1,g6842.t1,g6848.t1,g695.t1,g7242.t1,g7443.t1,g7452…	2.007165407,0.570731486,0.860301544,1.165233075,1.096775086,1.102235089,0.805829882,0.832927726,0.728040913,1.277003378,0.996871352,-0.619959779,-0.644881443,1.171518274,1.203339787,0.785747421,1.078733911,1.301316917,1.018603077,0.659019212,1.023713969,1.070813282,1.564059394,1.150589001,0.747557182,-0.658541943,0.712143131,0.602846021,-1.572355532,-0.882270878,1.336477968,1.237263135,0.84472015…
GO Process	GO:0009057	Macromolecule catabolic process	100	611	1.45797	bottom	6.81e-05	ks	STRG0A56FBJ.g10276.t1,STRG0A56FBJ.g10278.t1,STRG0A56FBJ.g10310.t1,STRG0A56FBJ.g10976.t1,STRG0A56FBJ.g11146.t1,STRG0A56FBJ.g11432.t1,STRG0A56FBJ.g11434.t1,STRG0A56FBJ.g11450.t1,STRG0A56FBJ.g12552.t1,STRG0A56FBJ.g12683.t1,STRG0A56FBJ.g12779.t1,STRG0A56FBJ.g12895.t1,STRG0A56FBJ.g12904.t1,STRG0A56FBJ.g13343.t1,STRG0A56FBJ.g13459.t1,STRG0A56FBJ.g13460.t1,STRG0A56FBJ.g13806.t1,STRG0A56FBJ.g13905.t1,STR…	g10276.t1,g10278.t1,g10310.t1,g10976.t1,g11146.t1,g11432.t1,g11434.t1,g11450.t1,g12552.t1,g12683.t1,g12779.t1,g12895.t1,g12904.t1,g13343.t1,g13459.t1,g13460.t1,g13806.t1,g13905.t1,g13929.t1,g1394.t1,g14118.t1,g14125.t1,g14156.t1,g14221.t1,g14262.t1,g14471.t1,g14870.t1,g15033.t1,g1510.t1,g15170.t1,g15359.t1,g15390.t1,g1559.t1,g15900.t1,g15904.t1,g1608.t1,g16154.t1,g16314.t1,g16330.t1,g16382.t1,g16…	g10276.t1,g10278.t1,g10310.t1,g10976.t1,g11146.t1,g11432.t1,g11434.t1,g11450.t1,g12552.t1,g12683.t1,g12779.t1,g12895.t1,g12904.t1,g13343.t1,g13459.t1,g13460.t1,g13806.t1,g13905.t1,g13929.t1,g1394.t1,g14118.t1,g14125.t1,g14156.t1,g14221.t1,g14262.t1,g14471.t1,g14870.t1,g15033.t1,g1510.t1,g15170.t1,g15359.t1,g15390.t1,g1559.t1,g15900.t1,g15904.t1,g1608.t1,g16154.t1,g16314.t1,g16330.t1,g16382.t1,g16…	0.911242154,1.189426926,2.007165407,-1.797248481,2.8846113,-2.434477051,-2.415788799,1.250435787,0.570731486,0.860301544,1.60224546,1.165233075,1.154561674,1.096775086,1.102235089,0.805829882,0.741590607,0.735627922,1.370464581,0.832927726,1.072258989,3.057315031,0.728040913,1.277003378,0.996871352,1.150842856,-0.619959779,1.162423469,-0.644881443,1.171518274,0.983277348,1.170458803,1.203339787,0…
GO Process	GO:0015908	Fatty acid transport	15	32	3.47538	top	7.67e-05	afc	STRG0A56FBJ.g12080.t1,STRG0A56FBJ.g12096.t1,STRG0A56FBJ.g12164.t1,STRG0A56FBJ.g12170.t1,STRG0A56FBJ.g12948.t1,STRG0A56FBJ.g13232.t1,STRG0A56FBJ.g16100.t1,STRG0A56FBJ.g16467.t1,STRG0A56FBJ.g16468.t1,STRG0A56FBJ.g2113.t1,STRG0A56FBJ.g3849.t1,STRG0A56FBJ.g6549.t1,STRG0A56FBJ.g6737.t1,STRG0A56FBJ.g8541.t1,STRG0A56FBJ.g8542.t1	g12080.t1,g12096.t1,g12164.t1,g12170.t1,g12948.t1,g13232.t1,g16100.t1,g16467.t1,g16468.t1,g2113.t1,g3849.t1,g6549.t1,g6737.t1,g8541.t1,g8542.t1	g12080.t1,g12096.t1,g12164.t1,g12170.t1,g12948.t1,g13232.t1,g16100.t1,g16467.t1,g16468.t1,g2113.t1,g3849.t1,g6549.t1,g6737.t1,g8541.t1,g8542.t1	-1.983173447,-1.143696305,-2.975742936,-3.214961242,-1.69738072,-1.600701384,-2.530509893,-1.85403163,-2.114422683,-1.202819241,-1.834398661,-1.074903502,-1.82825595,-1.794909836,-1.658871611
GO Process	GO:0018130	Heterocycle biosynthetic process	89	527	2.34743	bottom	7.93e-05	ks	STRG0A56FBJ.g10552.t1,STRG0A56FBJ.g10758.t1,STRG0A56FBJ.g10767.t1,STRG0A56FBJ.g11427.t1,STRG0A56FBJ.g11760.t1,STRG0A56FBJ.g11794.t1,STRG0A56FBJ.g11962.t1,STRG0A56FBJ.g11999.t1,STRG0A56FBJ.g1206.t1,STRG0A56FBJ.g12187.t1,STRG0A56FBJ.g12810.t1,STRG0A56FBJ.g12813.t1,STRG0A56FBJ.g12836.t1,STRG0A56FBJ.g13284.t1,STRG0A56FBJ.g13398.t1,STRG0A56FBJ.g13564.t1,STRG0A56FBJ.g13675.t1,STRG0A56FBJ.g13701.t1,STRG…	g10552.t1,g10758.t1,g10767.t1,g11427.t1,g11760.t1,g11794.t1,g11962.t1,g11999.t1,g1206.t1,g12187.t1,g12810.t1,g12813.t1,g12836.t1,g13284.t1,g13398.t1,g13564.t1,g13675.t1,g13701.t1,g1381.t1,g13973.t1,g14143.t1,g14176.t1,g14365.t1,g14886.t1,g14981.t1,g15022.t1,g15388.t1,g15496.t1,g16104.t1,g1628.t1,g1641.t1,g16589.t1,g16597.t1,g1995.t1,g2175.t1,g22.t1,g22.t2,g2336.t1,g2485.t1,g2535.t1,g2794.t1,g2810…	g10552.t1,g10758.t1,g10767.t1,g11427.t1,g11760.t1,g11794.t1,g11962.t1,g11999.t1,g1206.t1,g12187.t1,g12810.t1,g12813.t1,g12836.t1,g13284.t1,g13398.t1,g13564.t1,g13675.t1,g13701.t1,g1381.t1,g13973.t1,g14143.t1,g14176.t1,g14365.t1,g14886.t1,g14981.t1,g15022.t1,g15388.t1,g15496.t1,g16104.t1,g1628.t1,g1641.t1,g16589.t1,g16597.t1,g1995.t1,g2175.t1,g22.t1,g22.t2,g2336.t1,g2485.t1,g2535.t1,g2794.t1,g2810…	1.798344637,-1.275611172,-1.728501851,-1.548932509,2.803416794,-1.476143824,-1.144588371,0.877772701,0.896245211,1.274768331,0.746691933,3.136441327,2.872550878,0.993408531,1.171325089,1.623357739,0.992727049,0.751303856,-1.097426611,0.89763724,1.249711279,3.001770209,0.592831433,0.737221712,0.863436214,-0.77639797,-1.569593078,1.000409815,-3.170054807,1.533259053,1.739105484,1.403778701,1.457256…
GO Process	GO:0006575	Cellular modified amino acid metabolic process	41	197	2.32782	top	8.42e-05	ks	STRG0A56FBJ.g10280.t1,STRG0A56FBJ.g10999.t1,STRG0A56FBJ.g11126.t1,STRG0A56FBJ.g11239.t1,STRG0A56FBJ.g11240.t1,STRG0A56FBJ.g11538.t1,STRG0A56FBJ.g11916.t1,STRG0A56FBJ.g13467.t1,STRG0A56FBJ.g14458.t1,STRG0A56FBJ.g14628.t1,STRG0A56FBJ.g14632.t1,STRG0A56FBJ.g14633.t1,STRG0A56FBJ.g14635.t1,STRG0A56FBJ.g15467.t1,STRG0A56FBJ.g15928.t1,STRG0A56FBJ.g16131.t1,STRG0A56FBJ.g16566.t1,STRG0A56FBJ.g16567.t1,STR…	g10280.t1,g10999.t1,g11126.t1,g11239.t1,g11240.t1,g11538.t1,g11916.t1,g13467.t1,g14458.t1,g14628.t1,g14632.t1,g14633.t1,g14635.t1,g15467.t1,g15928.t1,g16131.t1,g16566.t1,g16567.t1,g16807.t1,g1817.t1,g2380.t1,g2854.t1,g3059.t1,g3251.t1,g3828.t1,g3856.t1,g4427.t1,g5655.t1,g5674.t1,g6325.t1,g6544.t1,g6737.t1,g6807.t1,g7232.t1,g8467.t1,g8541.t1,g8542.t1,g8696.t1,g9255.t1,g9355.t1,g9356.t1	g10280.t1,g10999.t1,g11126.t1,g11239.t1,g11240.t1,g11538.t1,g11916.t1,g13467.t1,g14458.t1,g14628.t1,g14632.t1,g14633.t1,g14635.t1,g15467.t1,g15928.t1,g16131.t1,g16566.t1,g16567.t1,g16807.t1,g1817.t1,g2380.t1,g2854.t1,g3059.t1,g3251.t1,g3828.t1,g3856.t1,g4427.t1,g5655.t1,g5674.t1,g6325.t1,g6544.t1,g6737.t1,g6807.t1,g7232.t1,g8467.t1,g8541.t1,g8542.t1,g8696.t1,g9255.t1,g9355.t1,g9356.t1	-1.100968618,-0.876018626,-0.871471982,-1.040095042,-1.73921872,-1.305824839,-1.630163172,0.616742099,-1.170376542,-1.001102041,-1.461117446,-1.233336731,-1.223900058,-0.488832176,-1.191422266,-2.506592586,1.05874095,-1.2737797,-0.834530605,-1.622564261,-1.529619228,-0.798244261,-3.516680651,0.786042846,-1.39731617,-1.475253512,-5.20475451,-2.31685559,1.195467903,-2.550697389,-1.130641456,-1.8282…
GO Process	GO:0006275	Regulation of DNA replication	13	68	4.80328	bottom	8.5e-05	afc	STRG0A56FBJ.g12813.t1,STRG0A56FBJ.g13279.t1,STRG0A56FBJ.g16703.t1,STRG0A56FBJ.g16727.t1,STRG0A56FBJ.g2291.t1,STRG0A56FBJ.g4123.t1,STRG0A56FBJ.g4458.t1,STRG0A56FBJ.g7006.t1,STRG0A56FBJ.g7055.t1,STRG0A56FBJ.g7992.t1,STRG0A56FBJ.g8189.t1,STRG0A56FBJ.g8245.t1,STRG0A56FBJ.g8257.t1	g12813.t1,g13279.t1,g16703.t1,g16727.t1,g2291.t1,g4123.t1,g4458.t1,g7006.t1,g7055.t1,g7992.t1,g8189.t1,g8245.t1,g8257.t1	g12813.t1,g13279.t1,g16703.t1,g16727.t1,g2291.t1,g4123.t1,g4458.t1,g7006.t1,g7055.t1,g7992.t1,g8189.t1,g8245.t1,g8257.t1	3.136441327,2.9608896,1.854164198,0.677920055,1.180377591,0.656338424,-0.809905791,2.348747702,0.971634419,2.233619539,0.687377784,2.96905522,1.978067575
GO Process	GO:0032774	RNA biosynthetic process	22	211	3.44595	bottom	8.5e-05	ks	STRG0A56FBJ.g10552.t1,STRG0A56FBJ.g11999.t1,STRG0A56FBJ.g1206.t1,STRG0A56FBJ.g12187.t1,STRG0A56FBJ.g13973.t1,STRG0A56FBJ.g14143.t1,STRG0A56FBJ.g14886.t1,STRG0A56FBJ.g14981.t1,STRG0A56FBJ.g1628.t1,STRG0A56FBJ.g2175.t1,STRG0A56FBJ.g4234.t1,STRG0A56FBJ.g4950.t1,STRG0A56FBJ.g5433.t1,STRG0A56FBJ.g5654.t1,STRG0A56FBJ.g6345.t1,STRG0A56FBJ.g6691.t1,STRG0A56FBJ.g6800.t1,STRG0A56FBJ.g7206.t1,STRG0A56FBJ.g7…	g10552.t1,g11999.t1,g1206.t1,g12187.t1,g13973.t1,g14143.t1,g14886.t1,g14981.t1,g1628.t1,g2175.t1,g4234.t1,g4950.t1,g5433.t1,g5654.t1,g6345.t1,g6691.t1,g6800.t1,g7206.t1,g7631.t1,g8189.t1,g8283.t1,g8514.t1	g10552.t1,g11999.t1,g1206.t1,g12187.t1,g13973.t1,g14143.t1,g14886.t1,g14981.t1,g1628.t1,g2175.t1,g4234.t1,g4950.t1,g5433.t1,g5654.t1,g6345.t1,g6691.t1,g6800.t1,g7206.t1,g7631.t1,g8189.t1,g8283.t1,g8514.t1	1.798344637,0.877772701,0.896245211,1.274768331,0.89763724,1.249711279,0.737221712,0.863436214,1.533259053,0.942603195,1.003020849,1.182797934,1.037334468,0.822087679,1.195691954,1.028068556,1.386766804,1.271535258,1.693972121,0.687377784,0.814753642,1.237415107
GO Process	GO:0030258	Lipid modification	32	133	2.58533	top	9.98e-05	ks	STRG0A56FBJ.g10290.t1,STRG0A56FBJ.g10703.t1,STRG0A56FBJ.g11538.t1,STRG0A56FBJ.g11679.t1,STRG0A56FBJ.g11694.t1,STRG0A56FBJ.g12333.t1,STRG0A56FBJ.g12334.t1,STRG0A56FBJ.g12948.t1,STRG0A56FBJ.g13677.t1,STRG0A56FBJ.g14050.t1,STRG0A56FBJ.g14236.t1,STRG0A56FBJ.g14406.t1,STRG0A56FBJ.g15467.t1,STRG0A56FBJ.g15687.t1,STRG0A56FBJ.g15689.t1,STRG0A56FBJ.g16440.t1,STRG0A56FBJ.g16441.t1,STRG0A56FBJ.g16461.t1,STR…	g10290.t1,g10703.t1,g11538.t1,g11679.t1,g11694.t1,g12333.t1,g12334.t1,g12948.t1,g13677.t1,g14050.t1,g14236.t1,g14406.t1,g15467.t1,g15687.t1,g15689.t1,g16440.t1,g16441.t1,g16461.t1,g2134.t1,g2252.t1,g2342.t1,g3828.t1,g5518.t1,g6549.t1,g6737.t1,g749.t1,g7830.t1,g7948.t1,g8541.t1,g8542.t1,g8741.t1,g9255.t1	g10290.t1,g10703.t1,g11538.t1,g11679.t1,g11694.t1,g12333.t1,g12334.t1,g12948.t1,g13677.t1,g14050.t1,g14236.t1,g14406.t1,g15467.t1,g15687.t1,g15689.t1,g16440.t1,g16441.t1,g16461.t1,g2134.t1,g2252.t1,g2342.t1,g3828.t1,g5518.t1,g6549.t1,g6737.t1,g749.t1,g7830.t1,g7948.t1,g8541.t1,g8542.t1,g8741.t1,g9255.t1	-0.769387904,-1.622559879,-1.305824839,-1.395221824,-1.220134787,-1.392196703,-2.238113402,-1.69738072,-1.725429596,-0.603196985,-1.718221854,-2.519233849,-0.488832176,-2.166546217,-1.268511085,-2.253090461,-1.936063544,-2.445508714,-1.535293121,-1.361037985,-0.718571217,-1.39731617,0.896691268,-1.074903502,-1.82825595,-2.236267397,-1.181120151,-0.890731245,-1.794909836,-1.658871611,-2.160386515,…
GO Process	GO:0008033	tRNA processing	19	114	4.06042	bottom	0.00012	afc	STRG0A56FBJ.g12722.t1,STRG0A56FBJ.g12816.t1,STRG0A56FBJ.g13042.t1,STRG0A56FBJ.g13718.t1,STRG0A56FBJ.g14243.t1,STRG0A56FBJ.g14888.t1,STRG0A56FBJ.g14992.t1,STRG0A56FBJ.g15309.t1,STRG0A56FBJ.g15397.t1,STRG0A56FBJ.g2232.t1,STRG0A56FBJ.g2311.t1,STRG0A56FBJ.g2667.t1,STRG0A56FBJ.g2692.t1,STRG0A56FBJ.g3125.t1,STRG0A56FBJ.g4179.t1,STRG0A56FBJ.g5518.t1,STRG0A56FBJ.g5600.t1,STRG0A56FBJ.g5753.t1,STRG0A56FBJ.…	g12722.t1,g12816.t1,g13042.t1,g13718.t1,g14243.t1,g14888.t1,g14992.t1,g15309.t1,g15397.t1,g2232.t1,g2311.t1,g2667.t1,g2692.t1,g3125.t1,g4179.t1,g5518.t1,g5600.t1,g5753.t1,g7640.t1	g12722.t1,g12816.t1,g13042.t1,g13718.t1,g14243.t1,g14888.t1,g14992.t1,g15309.t1,g15397.t1,g2232.t1,g2311.t1,g2667.t1,g2692.t1,g3125.t1,g4179.t1,g5518.t1,g5600.t1,g5753.t1,g7640.t1	0.677328044,1.567087336,2.741363783,0.949910569,1.524443724,1.60276862,0.980139671,0.83213681,0.857327905,2.461318418,1.591407605,1.247370659,1.439758596,2.154903887,1.009281909,0.896691268,-0.953401937,2.174315398,1.587537929
GO Process	GO:0033260	Nuclear DNA replication	6	18	6.33092	bottom	0.00012	afc	STRG0A56FBJ.g12939.t1,STRG0A56FBJ.g16515.t1,STRG0A56FBJ.g16882.t1,STRG0A56FBJ.g6159.t1,STRG0A56FBJ.g7006.t1,STRG0A56FBJ.g8245.t1	g12939.t1,g16515.t1,g16882.t1,g6159.t1,g7006.t1,g8245.t1	g12939.t1,g16515.t1,g16882.t1,g6159.t1,g7006.t1,g8245.t1	1.946426853,3.198996552,0.899961293,1.583158939,2.348747702,2.96905522
GO Process	GO:0006351	Transcription, DNA-templated	21	199	3.47647	bottom	0.00014	ks	STRG0A56FBJ.g10552.t1,STRG0A56FBJ.g1206.t1,STRG0A56FBJ.g12187.t1,STRG0A56FBJ.g13973.t1,STRG0A56FBJ.g14143.t1,STRG0A56FBJ.g14886.t1,STRG0A56FBJ.g14981.t1,STRG0A56FBJ.g1628.t1,STRG0A56FBJ.g2175.t1,STRG0A56FBJ.g4234.t1,STRG0A56FBJ.g4950.t1,STRG0A56FBJ.g5433.t1,STRG0A56FBJ.g5654.t1,STRG0A56FBJ.g6345.t1,STRG0A56FBJ.g6691.t1,STRG0A56FBJ.g6800.t1,STRG0A56FBJ.g7206.t1,STRG0A56FBJ.g7631.t1,STRG0A56FBJ.g81…	g10552.t1,g1206.t1,g12187.t1,g13973.t1,g14143.t1,g14886.t1,g14981.t1,g1628.t1,g2175.t1,g4234.t1,g4950.t1,g5433.t1,g5654.t1,g6345.t1,g6691.t1,g6800.t1,g7206.t1,g7631.t1,g8189.t1,g8283.t1,g8514.t1	g10552.t1,g1206.t1,g12187.t1,g13973.t1,g14143.t1,g14886.t1,g14981.t1,g1628.t1,g2175.t1,g4234.t1,g4950.t1,g5433.t1,g5654.t1,g6345.t1,g6691.t1,g6800.t1,g7206.t1,g7631.t1,g8189.t1,g8283.t1,g8514.t1	1.798344637,0.896245211,1.274768331,0.89763724,1.249711279,0.737221712,0.863436214,1.533259053,0.942603195,1.003020849,1.182797934,1.037334468,0.822087679,1.195691954,1.028068556,1.386766804,1.271535258,1.693972121,0.687377784,0.814753642,1.237415107
GO Process	GO:0017148	Negative regulation of translation	23	87	3.60374	bottom	0.00014	ks	STRG0A56FBJ.g11285.t1,STRG0A56FBJ.g1165.t1,STRG0A56FBJ.g12914.t1,STRG0A56FBJ.g13260.t1,STRG0A56FBJ.g14118.t1,STRG0A56FBJ.g1441.t1,STRG0A56FBJ.g15033.t1,STRG0A56FBJ.g16382.t1,STRG0A56FBJ.g16664.t1,STRG0A56FBJ.g16882.t1,STRG0A56FBJ.g2667.t1,STRG0A56FBJ.g3152.t1,STRG0A56FBJ.g5088.t1,STRG0A56FBJ.g5775.t1,STRG0A56FBJ.g6314.t1,STRG0A56FBJ.g6689.t1,STRG0A56FBJ.g6776.t1,STRG0A56FBJ.g7283.t1,STRG0A56FBJ.g…	g11285.t1,g1165.t1,g12914.t1,g13260.t1,g14118.t1,g1441.t1,g15033.t1,g16382.t1,g16664.t1,g16882.t1,g2667.t1,g3152.t1,g5088.t1,g5775.t1,g6314.t1,g6689.t1,g6776.t1,g7283.t1,g7601.t1,g8501.t1,g8833.t1,g951.t1,g951.t2	g11285.t1,g1165.t1,g12914.t1,g13260.t1,g14118.t1,g1441.t1,g15033.t1,g16382.t1,g16664.t1,g16882.t1,g2667.t1,g3152.t1,g5088.t1,g5775.t1,g6314.t1,g6689.t1,g6776.t1,g7283.t1,g7601.t1,g8501.t1,g8833.t1,g951.t1,g951.t2	0.772037949,1.607019364,1.186783884,1.535837816,1.072258989,1.377012035,1.162423469,1.959919797,-2.180683348,0.899961293,1.247370659,0.893928334,1.659652199,0.922409522,1.154708524,1.05487624,1.404644675,2.44310085,1.246038332,1.50886069,0.73948922,1.480138645,1.712068534
GO Process	GO:0019438	Aromatic compound biosynthetic process	86	598	2.27899	bottom	0.00014	ks	STRG0A56FBJ.g10552.t1,STRG0A56FBJ.g10758.t1,STRG0A56FBJ.g10767.t1,STRG0A56FBJ.g11427.t1,STRG0A56FBJ.g11760.t1,STRG0A56FBJ.g11794.t1,STRG0A56FBJ.g11962.t1,STRG0A56FBJ.g11999.t1,STRG0A56FBJ.g1206.t1,STRG0A56FBJ.g12187.t1,STRG0A56FBJ.g12810.t1,STRG0A56FBJ.g12813.t1,STRG0A56FBJ.g13284.t1,STRG0A56FBJ.g13398.t1,STRG0A56FBJ.g13564.t1,STRG0A56FBJ.g13675.t1,STRG0A56FBJ.g13701.t1,STRG0A56FBJ.g1381.t1,STRG0…	g10552.t1,g10758.t1,g10767.t1,g11427.t1,g11760.t1,g11794.t1,g11962.t1,g11999.t1,g1206.t1,g12187.t1,g12810.t1,g12813.t1,g13284.t1,g13398.t1,g13564.t1,g13675.t1,g13701.t1,g1381.t1,g13973.t1,g14143.t1,g14176.t1,g14365.t1,g14886.t1,g14981.t1,g15022.t1,g15388.t1,g15496.t1,g16104.t1,g1628.t1,g1641.t1,g16589.t1,g16597.t1,g1995.t1,g2175.t1,g22.t1,g22.t2,g2485.t1,g2535.t1,g2794.t1,g2810.t1,g2869.t1,g2968.…	g10552.t1,g10758.t1,g10767.t1,g11427.t1,g11760.t1,g11794.t1,g11962.t1,g11999.t1,g1206.t1,g12187.t1,g12810.t1,g12813.t1,g13284.t1,g13398.t1,g13564.t1,g13675.t1,g13701.t1,g1381.t1,g13973.t1,g14143.t1,g14176.t1,g14365.t1,g14886.t1,g14981.t1,g15022.t1,g15388.t1,g15496.t1,g16104.t1,g1628.t1,g1641.t1,g16589.t1,g16597.t1,g1995.t1,g2175.t1,g22.t1,g22.t2,g2485.t1,g2535.t1,g2794.t1,g2810.t1,g2869.t1,g2968.…	1.798344637,-1.275611172,-1.728501851,-1.548932509,2.803416794,-1.476143824,-1.144588371,0.877772701,0.896245211,1.274768331,0.746691933,3.136441327,0.993408531,1.171325089,1.623357739,0.992727049,0.751303856,-1.097426611,0.89763724,1.249711279,3.001770209,0.592831433,0.737221712,0.863436214,-0.77639797,-1.569593078,1.000409815,-3.170054807,1.533259053,1.739105484,1.403778701,1.457256998,-1.63185…
GO Process	GO:0045892	Negative regulation of transcription, DNA-templated	38	404	2.73865	bottom	0.00014	ks	STRG0A56FBJ.g109.t1,STRG0A56FBJ.g11151.t1,STRG0A56FBJ.g11431.t1,STRG0A56FBJ.g11626.t1,STRG0A56FBJ.g11879.t1,STRG0A56FBJ.g12958.t1,STRG0A56FBJ.g13250.t1,STRG0A56FBJ.g13705.t1,STRG0A56FBJ.g14160.t1,STRG0A56FBJ.g14268.t1,STRG0A56FBJ.g1495.t1,STRG0A56FBJ.g1496.t1,STRG0A56FBJ.g15033.t1,STRG0A56FBJ.g15039.t1,STRG0A56FBJ.g15242.t1,STRG0A56FBJ.g15326.t1,STRG0A56FBJ.g16595.t1,STRG0A56FBJ.g16703.t1,STRG0A5…	g109.t1,g11151.t1,g11431.t1,g11626.t1,g11879.t1,g12958.t1,g13250.t1,g13705.t1,g14160.t1,g14268.t1,g1495.t1,g1496.t1,g15033.t1,g15039.t1,g15242.t1,g15326.t1,g16595.t1,g16703.t1,g1838.t1,g2175.t1,g2489.t1,g2527.t1,g2933.t1,g3781.t1,g3886.t1,g4505.t1,g5137.t1,g5200.t1,g5710.t1,g6121.t1,g6549.t1,g6652.t1,g7268.t1,g7631.t1,g7975.t1,g8411.t1,g8591.t1,g9407.t1	g109.t1,g11151.t1,g11431.t1,g11626.t1,g11879.t1,g12958.t1,g13250.t1,g13705.t1,g14160.t1,g14268.t1,g1495.t1,g1496.t1,g15033.t1,g15039.t1,g15242.t1,g15326.t1,g16595.t1,g16703.t1,g1838.t1,g2175.t1,g2489.t1,g2527.t1,g2933.t1,g3781.t1,g3886.t1,g4505.t1,g5137.t1,g5200.t1,g5710.t1,g6121.t1,g6549.t1,g6652.t1,g7268.t1,g7631.t1,g7975.t1,g8411.t1,g8591.t1,g9407.t1	0.979392542,0.667149877,1.33275789,1.323694824,0.886978057,1.163260983,1.420357293,0.797574806,1.410958354,1.171657699,-2.768579105,-2.318726146,1.162423469,1.39339247,1.836469269,0.839474537,0.729218637,1.854164198,0.809721044,0.942603195,1.593126435,1.747312737,1.043996403,0.87878332,-1.03407938,-0.658541943,0.712143131,0.700941323,0.750170095,1.249424785,-1.074903502,1.07669455,1.517043867,1.6…
GO Process	GO:1902975	Mitotic DNA replication initiation	3	5	8.20763	bottom	0.00014	afc	STRG0A56FBJ.g16515.t1,STRG0A56FBJ.g7006.t1,STRG0A56FBJ.g8245.t1	g16515.t1,g7006.t1,g8245.t1	g16515.t1,g7006.t1,g8245.t1	3.198996552,2.348747702,2.96905522
GO Process	GO:0009062	Fatty acid catabolic process	31	84	2.59124	top	0.00015	ks	STRG0A56FBJ.g10290.t1,STRG0A56FBJ.g10703.t1,STRG0A56FBJ.g11538.t1,STRG0A56FBJ.g12333.t1,STRG0A56FBJ.g12334.t1,STRG0A56FBJ.g12948.t1,STRG0A56FBJ.g13232.t1,STRG0A56FBJ.g13677.t1,STRG0A56FBJ.g14050.t1,STRG0A56FBJ.g14236.t1,STRG0A56FBJ.g14406.t1,STRG0A56FBJ.g15058.t1,STRG0A56FBJ.g15467.t1,STRG0A56FBJ.g15687.t1,STRG0A56FBJ.g15689.t1,STRG0A56FBJ.g16440.t1,STRG0A56FBJ.g16441.t1,STRG0A56FBJ.g16461.t1,STR…	g10290.t1,g10703.t1,g11538.t1,g12333.t1,g12334.t1,g12948.t1,g13232.t1,g13677.t1,g14050.t1,g14236.t1,g14406.t1,g15058.t1,g15467.t1,g15687.t1,g15689.t1,g16440.t1,g16441.t1,g16461.t1,g2134.t1,g2342.t1,g3828.t1,g5518.t1,g6165.t1,g6549.t1,g6737.t1,g749.t1,g7948.t1,g8541.t1,g8542.t1,g8741.t1,g9255.t1	g10290.t1,g10703.t1,g11538.t1,g12333.t1,g12334.t1,g12948.t1,g13232.t1,g13677.t1,g14050.t1,g14236.t1,g14406.t1,g15058.t1,g15467.t1,g15687.t1,g15689.t1,g16440.t1,g16441.t1,g16461.t1,g2134.t1,g2342.t1,g3828.t1,g5518.t1,g6165.t1,g6549.t1,g6737.t1,g749.t1,g7948.t1,g8541.t1,g8542.t1,g8741.t1,g9255.t1	-0.769387904,-1.622559879,-1.305824839,-1.392196703,-2.238113402,-1.69738072,-1.600701384,-1.725429596,-0.603196985,-1.718221854,-2.519233849,-0.907349351,-0.488832176,-2.166546217,-1.268511085,-2.253090461,-1.936063544,-2.445508714,-1.535293121,-0.718571217,-1.39731617,0.896691268,-1.289921254,-1.074903502,-1.82825595,-2.236267397,-0.890731245,-1.794909836,-1.658871611,-2.160386515,-0.69224213
GO Process	GO:0044786	Cell cycle DNA replication	7	19	5.97381	bottom	0.00016	afc	STRG0A56FBJ.g11450.t1,STRG0A56FBJ.g12939.t1,STRG0A56FBJ.g16515.t1,STRG0A56FBJ.g16882.t1,STRG0A56FBJ.g6159.t1,STRG0A56FBJ.g7006.t1,STRG0A56FBJ.g8245.t1	g11450.t1,g12939.t1,g16515.t1,g16882.t1,g6159.t1,g7006.t1,g8245.t1	g11450.t1,g12939.t1,g16515.t1,g16882.t1,g6159.t1,g7006.t1,g8245.t1	1.250435787,1.946426853,3.198996552,0.899961293,1.583158939,2.348747702,2.96905522
GO Process	GO:2001252	Positive regulation of chromosome organization	9	55	5.47982	bottom	0.00016	afc	STRG0A56FBJ.g13240.t1,STRG0A56FBJ.g14265.t1,STRG0A56FBJ.g14847.t1,STRG0A56FBJ.g16073.t1,STRG0A56FBJ.g16510.t1,STRG0A56FBJ.g16625.t1,STRG0A56FBJ.g16703.t1,STRG0A56FBJ.g1838.t1,STRG0A56FBJ.g5301.t1	g13240.t1,g14265.t1,g14847.t1,g16073.t1,g16510.t1,g16625.t1,g16703.t1,g1838.t1,g5301.t1	g13240.t1,g14265.t1,g14847.t1,g16073.t1,g16510.t1,g16625.t1,g16703.t1,g1838.t1,g5301.t1	1.403764342,2.109140945,2.079494856,1.740947263,2.262894324,2.107518908,1.854164198,0.809721044,2.271744918
GO Process	GO:0000154	rRNA modification	6	36	6.23835	bottom	0.00017	afc	STRG0A56FBJ.g13042.t1,STRG0A56FBJ.g13272.t1,STRG0A56FBJ.g13403.t1,STRG0A56FBJ.g2311.t1,STRG0A56FBJ.g2843.t1,STRG0A56FBJ.g5301.t1	g13042.t1,g13272.t1,g13403.t1,g2311.t1,g2843.t1,g5301.t1	g13042.t1,g13272.t1,g13403.t1,g2311.t1,g2843.t1,g5301.t1	2.741363783,1.420638048,2.214116895,1.591407605,2.508444172,2.271744918
GO Process	GO:0032787	Monocarboxylic acid metabolic process	80	433	1.47288	top	0.00018	ks	STRG0A56FBJ.g10290.t1,STRG0A56FBJ.g10468.t1,STRG0A56FBJ.g10690.t1,STRG0A56FBJ.g10703.t1,STRG0A56FBJ.g10833.t1,STRG0A56FBJ.g10839.t1,STRG0A56FBJ.g109.t1,STRG0A56FBJ.g11126.t1,STRG0A56FBJ.g11511.t1,STRG0A56FBJ.g11538.t1,STRG0A56FBJ.g11541.t1,STRG0A56FBJ.g11543.t1,STRG0A56FBJ.g11588.t1,STRG0A56FBJ.g11601.t1,STRG0A56FBJ.g11947.t1,STRG0A56FBJ.g12080.t1,STRG0A56FBJ.g12096.t1,STRG0A56FBJ.g12333.t1,STRG0…	g10290.t1,g10468.t1,g10690.t1,g10703.t1,g10833.t1,g10839.t1,g109.t1,g11126.t1,g11511.t1,g11538.t1,g11541.t1,g11543.t1,g11588.t1,g11601.t1,g11947.t1,g12080.t1,g12096.t1,g12333.t1,g12334.t1,g12540.t1,g12552.t1,g12881.t1,g12948.t1,g13138.t1,g13232.t1,g13677.t1,g14050.t1,g14236.t1,g14406.t1,g14462.t1,g15058.t1,g15325.t1,g15467.t1,g15607.t1,g15687.t1,g15689.t1,g1613.t1,g16440.t1,g16441.t1,g16461.t1,g1…	g10290.t1,g10468.t1,g10690.t1,g10703.t1,g10833.t1,g10839.t1,g109.t1,g11126.t1,g11511.t1,g11538.t1,g11541.t1,g11543.t1,g11588.t1,g11601.t1,g11947.t1,g12080.t1,g12096.t1,g12333.t1,g12334.t1,g12540.t1,g12552.t1,g12881.t1,g12948.t1,g13138.t1,g13232.t1,g13677.t1,g14050.t1,g14236.t1,g14406.t1,g14462.t1,g15058.t1,g15325.t1,g15467.t1,g15607.t1,g15687.t1,g15689.t1,g1613.t1,g16440.t1,g16441.t1,g16461.t1,g1…	-0.769387904,1.077131847,-1.012187087,-1.622559879,-1.2972136,0.588116581,0.979392542,-0.871471982,0.840257483,-1.305824839,-2.409930835,-2.283875353,-1.674451582,-1.976102221,1.82203744,-1.983173447,-1.143696305,-1.392196703,-2.238113402,-0.954691762,0.570731486,1.009215292,-1.69738072,1.674839412,-1.600701384,-1.725429596,-0.603196985,-1.718221854,-2.519233849,-1.612924617,-0.907349351,-0.61767…
GO Process	GO:0007283	Spermatogenesis	43	230	2.15079	top	0.00019	ks	STRG0A56FBJ.g10263.t1,STRG0A56FBJ.g10758.t1,STRG0A56FBJ.g10924.t1,STRG0A56FBJ.g11427.t1,STRG0A56FBJ.g11838.t1,STRG0A56FBJ.g11863.t1,STRG0A56FBJ.g11926.t1,STRG0A56FBJ.g12989.t1,STRG0A56FBJ.g13247.t1,STRG0A56FBJ.g13305.t1,STRG0A56FBJ.g13305.t2,STRG0A56FBJ.g13305.t5,STRG0A56FBJ.g13728.t1,STRG0A56FBJ.g14096.t1,STRG0A56FBJ.g14418.t1,STRG0A56FBJ.g14903.t1,STRG0A56FBJ.g15191.t1,STRG0A56FBJ.g15901.t1,STR…	g10263.t1,g10758.t1,g10924.t1,g11427.t1,g11838.t1,g11863.t1,g11926.t1,g12989.t1,g13247.t1,g13305.t1,g13305.t2,g13305.t5,g13728.t1,g14096.t1,g14418.t1,g14903.t1,g15191.t1,g15901.t1,g16005.t1,g16031.t1,g16037.t1,g1639.t1,g16575.t1,g1936.t1,g1987.t1,g2328.t1,g2962.t1,g3280.t1,g3615.t1,g3913.t1,g4609.t1,g4721.t1,g4791.t1,g5208.t1,g5374.t1,g5538.t1,g5835.t1,g6070.t1,g6188.t1,g6628.t1,g7146.t1,g7276.t1…	g10263.t1,g10758.t1,g10924.t1,g11427.t1,g11838.t1,g11863.t1,g11926.t1,g12989.t1,g13247.t1,g13305.t1,g13305.t2,g13305.t5,g13728.t1,g14096.t1,g14418.t1,g14903.t1,g15191.t1,g15901.t1,g16005.t1,g16031.t1,g16037.t1,g1639.t1,g16575.t1,g1936.t1,g1987.t1,g2328.t1,g2962.t1,g3280.t1,g3615.t1,g3913.t1,g4609.t1,g4721.t1,g4791.t1,g5208.t1,g5374.t1,g5538.t1,g5835.t1,g6070.t1,g6188.t1,g6628.t1,g7146.t1,g7276.t1…	1.270511721,-1.275611172,-1.822056587,-1.548932509,0.904655247,-1.868574883,1.048116873,-1.963218802,-0.962807666,-3.522685347,-3.603433648,-2.954786037,-1.379090193,-0.934510256,-1.9227885,-0.729194633,-1.805382194,-1.132956181,-0.945953705,-1.860591086,0.617361382,1.986155183,-0.803956579,-1.798760085,-1.463184988,0.772284831,-2.147871691,-2.240452787,-2.185771866,-1.341254593,-1.334911118,-1.4…
GO Process	GO:0018193	Peptidyl-amino acid modification	69	569	2.20486	bottom	0.00019	ks	STRG0A56FBJ.g10249.t1,STRG0A56FBJ.g10309.t1,STRG0A56FBJ.g10334.t1,STRG0A56FBJ.g10545.t1,STRG0A56FBJ.g10555.t1,STRG0A56FBJ.g1068.t1,STRG0A56FBJ.g11122.t1,STRG0A56FBJ.g11369.t1,STRG0A56FBJ.g12038.t1,STRG0A56FBJ.g12346.t1,STRG0A56FBJ.g12513.t1,STRG0A56FBJ.g12514.t1,STRG0A56FBJ.g12558.t1,STRG0A56FBJ.g12801.t1,STRG0A56FBJ.g12837.t1,STRG0A56FBJ.g12928.t1,STRG0A56FBJ.g13279.t1,STRG0A56FBJ.g13406.t1,STRG…	g10249.t1,g10309.t1,g10334.t1,g10545.t1,g10555.t1,g1068.t1,g11122.t1,g11369.t1,g12038.t1,g12346.t1,g12513.t1,g12514.t1,g12558.t1,g12801.t1,g12837.t1,g12928.t1,g13279.t1,g13406.t1,g13554.t1,g13629.t1,g13649.t1,g13973.t1,g14405.t1,g14417.t1,g1475.t1,g14876.t1,g15843.t1,g16350.t1,g16456.t1,g16646.t1,g16689.t1,g16703.t1,g16812.t1,g17000.t1,g17013.t1,g17020.t1,g1707.t1,g1775.t1,g1797.t1,g1830.t1,g1941…	g10249.t1,g10309.t1,g10334.t1,g10545.t1,g10555.t1,g1068.t1,g11122.t1,g11369.t1,g12038.t1,g12346.t1,g12513.t1,g12514.t1,g12558.t1,g12801.t1,g12837.t1,g12928.t1,g13279.t1,g13406.t1,g13554.t1,g13629.t1,g13649.t1,g13973.t1,g14405.t1,g14417.t1,g1475.t1,g14876.t1,g15843.t1,g16350.t1,g16456.t1,g16646.t1,g16689.t1,g16703.t1,g16812.t1,g17000.t1,g17013.t1,g17020.t1,g1707.t1,g1775.t1,g1797.t1,g1830.t1,g1941…	0.963537693,1.24228041,0.980851571,1.723201784,2.525495933,-0.880086988,-1.277151728,1.07180322,0.907283634,-1.517932058,0.728606639,0.924535494,1.340146323,0.52463068,1.198708879,1.400562672,2.9608896,-0.508839995,1.322662897,1.685755738,0.965199726,0.89763724,1.002378107,-1.983590108,-0.735042407,1.191203297,1.285016679,1.153468368,-0.536542184,0.718126556,1.006856731,1.854164198,1.084108836,0.…
GO Process	GO:0051603	Proteolysis involved in protein catabolic process	63	417	1.61017	bottom	0.00019	ks	STRG0A56FBJ.g10276.t1,STRG0A56FBJ.g10278.t1,STRG0A56FBJ.g10310.t1,STRG0A56FBJ.g10976.t1,STRG0A56FBJ.g11432.t1,STRG0A56FBJ.g11434.t1,STRG0A56FBJ.g12552.t1,STRG0A56FBJ.g12683.t1,STRG0A56FBJ.g12895.t1,STRG0A56FBJ.g13343.t1,STRG0A56FBJ.g13459.t1,STRG0A56FBJ.g13460.t1,STRG0A56FBJ.g13905.t1,STRG0A56FBJ.g1394.t1,STRG0A56FBJ.g14156.t1,STRG0A56FBJ.g14221.t1,STRG0A56FBJ.g14262.t1,STRG0A56FBJ.g14870.t1,STRG…	g10276.t1,g10278.t1,g10310.t1,g10976.t1,g11432.t1,g11434.t1,g12552.t1,g12683.t1,g12895.t1,g13343.t1,g13459.t1,g13460.t1,g13905.t1,g1394.t1,g14156.t1,g14221.t1,g14262.t1,g14870.t1,g1510.t1,g15170.t1,g15359.t1,g15390.t1,g1559.t1,g15900.t1,g15904.t1,g1608.t1,g16154.t1,g16314.t1,g16330.t1,g16735.t1,g16753.t1,g1932.t1,g1972.t1,g2004.t1,g2007.t1,g2886.t1,g4284.t1,g4294.t1,g4505.t1,g4910.t1,g5112.t1,g51…	g10276.t1,g10278.t1,g10310.t1,g10976.t1,g11432.t1,g11434.t1,g12552.t1,g12683.t1,g12895.t1,g13343.t1,g13459.t1,g13460.t1,g13905.t1,g1394.t1,g14156.t1,g14221.t1,g14262.t1,g14870.t1,g1510.t1,g15170.t1,g15359.t1,g15390.t1,g1559.t1,g15900.t1,g15904.t1,g1608.t1,g16154.t1,g16314.t1,g16330.t1,g16735.t1,g16753.t1,g1932.t1,g1972.t1,g2004.t1,g2007.t1,g2886.t1,g4284.t1,g4294.t1,g4505.t1,g4910.t1,g5112.t1,g51…	0.911242154,1.189426926,2.007165407,-1.797248481,-2.434477051,-2.415788799,0.570731486,0.860301544,1.165233075,1.096775086,1.102235089,0.805829882,0.735627922,0.832927726,0.728040913,1.277003378,0.996871352,-0.619959779,-0.644881443,1.171518274,0.983277348,1.170458803,1.203339787,0.785747421,1.078733911,-1.496946627,1.301316917,1.018603077,0.659019212,0.936374204,0.632375979,0.786041321,-1.824851…
GO Process	GO:0002183	Cytoplasmic translational initiation	18	31	4.02627	bottom	0.00024	afc	STRG0A56FBJ.g1065.t1,STRG0A56FBJ.g11765.t1,STRG0A56FBJ.g14342.t1,STRG0A56FBJ.g1472.t1,STRG0A56FBJ.g16236.t1,STRG0A56FBJ.g16407.t1,STRG0A56FBJ.g16501.t1,STRG0A56FBJ.g16786.t1,STRG0A56FBJ.g16921.t1,STRG0A56FBJ.g16953.t1,STRG0A56FBJ.g2023.t1,STRG0A56FBJ.g2542.t1,STRG0A56FBJ.g2844.t1,STRG0A56FBJ.g4280.t1,STRG0A56FBJ.g5248.t1,STRG0A56FBJ.g5249.t1,STRG0A56FBJ.g6642.t1,STRG0A56FBJ.g8379.t1	g1065.t1,g11765.t1,g14342.t1,g1472.t1,g16236.t1,g16407.t1,g16501.t1,g16786.t1,g16921.t1,g16953.t1,g2023.t1,g2542.t1,g2844.t1,g4280.t1,g5248.t1,g5249.t1,g6642.t1,g8379.t1	g1065.t1,g11765.t1,g14342.t1,g1472.t1,g16236.t1,g16407.t1,g16501.t1,g16786.t1,g16921.t1,g16953.t1,g2023.t1,g2542.t1,g2844.t1,g4280.t1,g5248.t1,g5249.t1,g6642.t1,g8379.t1	1.892385441,1.127115123,1.398157082,1.267105688,1.34917892,1.823552318,1.03137856,1.140496005,1.124474133,1.378645564,1.334102159,0.947145543,1.603193747,1.569831294,0.935043448,1.195311406,1.022451237,1.644331734
GO Process	GO:0006405	RNA export from nucleus	18	53	4.01951	bottom	0.00024	afc	STRG0A56FBJ.g10039.t1,STRG0A56FBJ.g12575.t1,STRG0A56FBJ.g14143.t1,STRG0A56FBJ.g1520.t1,STRG0A56FBJ.g15228.t1,STRG0A56FBJ.g15473.t1,STRG0A56FBJ.g16042.t1,STRG0A56FBJ.g2302.t1,STRG0A56FBJ.g2502.t1,STRG0A56FBJ.g5145.t1,STRG0A56FBJ.g5753.t1,STRG0A56FBJ.g5804.t1,STRG0A56FBJ.g6070.t1,STRG0A56FBJ.g7320.t1,STRG0A56FBJ.g7492.t1,STRG0A56FBJ.g7668.t1,STRG0A56FBJ.g8572.t1,STRG0A56FBJ.g9847.t1	g10039.t1,g12575.t1,g14143.t1,g1520.t1,g15228.t1,g15473.t1,g16042.t1,g2302.t1,g2502.t1,g5145.t1,g5753.t1,g5804.t1,g6070.t1,g7320.t1,g7492.t1,g7668.t1,g8572.t1,g9847.t1	g10039.t1,g12575.t1,g14143.t1,g1520.t1,g15228.t1,g15473.t1,g16042.t1,g2302.t1,g2502.t1,g5145.t1,g5753.t1,g5804.t1,g6070.t1,g7320.t1,g7492.t1,g7668.t1,g8572.t1,g9847.t1	1.010755651,2.645434198,1.249711279,0.995120911,1.132724558,0.83304777,0.776000669,1.238412198,1.396302797,2.01513142,2.174315398,1.039496532,1.094162469,1.049031779,0.665511061,0.820459674,1.764419174,1.839864242
GO Process	GO:0051052	Regulation of DNA metabolic process	31	227	4.04896	bottom	0.00025	ks	STRG0A56FBJ.g12813.t1,STRG0A56FBJ.g12837.t1,STRG0A56FBJ.g13279.t1,STRG0A56FBJ.g13390.t1,STRG0A56FBJ.g14265.t1,STRG0A56FBJ.g14847.t1,STRG0A56FBJ.g15331.t1,STRG0A56FBJ.g16510.t1,STRG0A56FBJ.g16625.t1,STRG0A56FBJ.g16664.t1,STRG0A56FBJ.g16703.t1,STRG0A56FBJ.g16727.t1,STRG0A56FBJ.g16882.t1,STRG0A56FBJ.g1838.t1,STRG0A56FBJ.g2291.t1,STRG0A56FBJ.g2311.t1,STRG0A56FBJ.g2520.t1,STRG0A56FBJ.g4123.t1,STRG0A56…	g12813.t1,g12837.t1,g13279.t1,g13390.t1,g14265.t1,g14847.t1,g15331.t1,g16510.t1,g16625.t1,g16664.t1,g16703.t1,g16727.t1,g16882.t1,g1838.t1,g2291.t1,g2311.t1,g2520.t1,g4123.t1,g4458.t1,g5301.t1,g6776.t1,g6993.t1,g7006.t1,g7055.t1,g7268.t1,g7992.t1,g8189.t1,g8245.t1,g8257.t1,g8283.t1,g9891.t1	g12813.t1,g12837.t1,g13279.t1,g13390.t1,g14265.t1,g14847.t1,g15331.t1,g16510.t1,g16625.t1,g16664.t1,g16703.t1,g16727.t1,g16882.t1,g1838.t1,g2291.t1,g2311.t1,g2520.t1,g4123.t1,g4458.t1,g5301.t1,g6776.t1,g6993.t1,g7006.t1,g7055.t1,g7268.t1,g7992.t1,g8189.t1,g8245.t1,g8257.t1,g8283.t1,g9891.t1	3.136441327,1.198708879,2.9608896,-0.56891928,2.109140945,2.079494856,1.352159792,2.262894324,2.107518908,-2.180683348,1.854164198,0.677920055,0.899961293,0.809721044,1.180377591,1.591407605,0.996657562,0.656338424,-0.809905791,2.271744918,1.404644675,0.700957326,2.348747702,0.971634419,1.517043867,2.233619539,0.687377784,2.96905522,1.978067575,0.814753642,1.000935899
GO Process	GO:0006082	Organic acid metabolic process	157	789	0.814496	top	0.00026	ks	STRG0A56FBJ.g10280.t1,STRG0A56FBJ.g10290.t1,STRG0A56FBJ.g10468.t1,STRG0A56FBJ.g10690.t1,STRG0A56FBJ.g10703.t1,STRG0A56FBJ.g10833.t1,STRG0A56FBJ.g10839.t1,STRG0A56FBJ.g109.t1,STRG0A56FBJ.g11126.t1,STRG0A56FBJ.g11200.t1,STRG0A56FBJ.g11511.t1,STRG0A56FBJ.g11538.t1,STRG0A56FBJ.g11541.t1,STRG0A56FBJ.g11543.t1,STRG0A56FBJ.g11588.t1,STRG0A56FBJ.g11601.t1,STRG0A56FBJ.g11916.t1,STRG0A56FBJ.g11947.t1,STRG0…	g10280.t1,g10290.t1,g10468.t1,g10690.t1,g10703.t1,g10833.t1,g10839.t1,g109.t1,g11126.t1,g11200.t1,g11511.t1,g11538.t1,g11541.t1,g11543.t1,g11588.t1,g11601.t1,g11916.t1,g11947.t1,g11999.t1,g12080.t1,g12096.t1,g1226.t1,g12333.t1,g12334.t1,g12540.t1,g12552.t1,g12684.t1,g12836.t1,g12869.t1,g12881.t1,g12948.t1,g13018.t1,g13138.t1,g13232.t1,g13556.t1,g13558.t1,g13559.t1,g13644.t1,g13677.t1,g13701.t1,g1…	g10280.t1,g10290.t1,g10468.t1,g10690.t1,g10703.t1,g10833.t1,g10839.t1,g109.t1,g11126.t1,g11200.t1,g11511.t1,g11538.t1,g11541.t1,g11543.t1,g11588.t1,g11601.t1,g11916.t1,g11947.t1,g11999.t1,g12080.t1,g12096.t1,g1226.t1,g12333.t1,g12334.t1,g12540.t1,g12552.t1,g12684.t1,g12836.t1,g12869.t1,g12881.t1,g12948.t1,g13018.t1,g13138.t1,g13232.t1,g13556.t1,g13558.t1,g13559.t1,g13644.t1,g13677.t1,g13701.t1,g1…	-1.100968618,-0.769387904,1.077131847,-1.012187087,-1.622559879,-1.2972136,0.588116581,0.979392542,-0.871471982,0.787680476,0.840257483,-1.305824839,-2.409930835,-2.283875353,-1.674451582,-1.976102221,-1.630163172,1.82203744,0.877772701,-1.983173447,-1.143696305,0.906831892,-1.392196703,-2.238113402,-0.954691762,0.570731486,1.308750176,2.872550878,-1.732083659,1.009215292,-1.69738072,-2.233983689…
GO Process	GO:0034249	Negative regulation of cellular amide metabolic process	25	95	3.32726	bottom	0.00026	ks	STRG0A56FBJ.g10334.t1,STRG0A56FBJ.g11285.t1,STRG0A56FBJ.g1165.t1,STRG0A56FBJ.g12914.t1,STRG0A56FBJ.g13260.t1,STRG0A56FBJ.g14118.t1,STRG0A56FBJ.g1441.t1,STRG0A56FBJ.g15033.t1,STRG0A56FBJ.g16382.t1,STRG0A56FBJ.g16664.t1,STRG0A56FBJ.g16882.t1,STRG0A56FBJ.g2667.t1,STRG0A56FBJ.g3152.t1,STRG0A56FBJ.g3430.t1,STRG0A56FBJ.g5088.t1,STRG0A56FBJ.g5775.t1,STRG0A56FBJ.g6314.t1,STRG0A56FBJ.g6689.t1,STRG0A56FBJ.…	g10334.t1,g11285.t1,g1165.t1,g12914.t1,g13260.t1,g14118.t1,g1441.t1,g15033.t1,g16382.t1,g16664.t1,g16882.t1,g2667.t1,g3152.t1,g3430.t1,g5088.t1,g5775.t1,g6314.t1,g6689.t1,g6776.t1,g7283.t1,g7601.t1,g8501.t1,g8833.t1,g951.t1,g951.t2	g10334.t1,g11285.t1,g1165.t1,g12914.t1,g13260.t1,g14118.t1,g1441.t1,g15033.t1,g16382.t1,g16664.t1,g16882.t1,g2667.t1,g3152.t1,g3430.t1,g5088.t1,g5775.t1,g6314.t1,g6689.t1,g6776.t1,g7283.t1,g7601.t1,g8501.t1,g8833.t1,g951.t1,g951.t2	0.980851571,0.772037949,1.607019364,1.186783884,1.535837816,1.072258989,1.377012035,1.162423469,1.959919797,-2.180683348,0.899961293,1.247370659,0.893928334,-1.15440606,1.659652199,0.922409522,1.154708524,1.05487624,1.404644675,2.44310085,1.246038332,1.50886069,0.73948922,1.480138645,1.712068534
GO Process	GO:0046314	Phosphocreatine biosynthetic process	3	6	7.11383	top	0.00027	afc	STRG0A56FBJ.g16131.t1,STRG0A56FBJ.g3059.t1,STRG0A56FBJ.g4427.t1	g16131.t1,g3059.t1,g4427.t1	g16131.t1,g3059.t1,g4427.t1	-2.506592586,-3.516680651,-5.20475451
GO Process	GO:0051168	Nuclear export	24	87	3.60109	bottom	0.00027	ks	STRG0A56FBJ.g10039.t1,STRG0A56FBJ.g11285.t1,STRG0A56FBJ.g12575.t1,STRG0A56FBJ.g14143.t1,STRG0A56FBJ.g14357.t1,STRG0A56FBJ.g1520.t1,STRG0A56FBJ.g15228.t1,STRG0A56FBJ.g15473.t1,STRG0A56FBJ.g16042.t1,STRG0A56FBJ.g2302.t1,STRG0A56FBJ.g2502.t1,STRG0A56FBJ.g4163.t1,STRG0A56FBJ.g5145.t1,STRG0A56FBJ.g5596.t1,STRG0A56FBJ.g5753.t1,STRG0A56FBJ.g5804.t1,STRG0A56FBJ.g6070.t1,STRG0A56FBJ.g6314.t1,STRG0A56FBJ.g…	g10039.t1,g11285.t1,g12575.t1,g14143.t1,g14357.t1,g1520.t1,g15228.t1,g15473.t1,g16042.t1,g2302.t1,g2502.t1,g4163.t1,g5145.t1,g5596.t1,g5753.t1,g5804.t1,g6070.t1,g6314.t1,g7320.t1,g7492.t1,g7668.t1,g8469.t1,g8572.t1,g9847.t1	g10039.t1,g11285.t1,g12575.t1,g14143.t1,g14357.t1,g1520.t1,g15228.t1,g15473.t1,g16042.t1,g2302.t1,g2502.t1,g4163.t1,g5145.t1,g5596.t1,g5753.t1,g5804.t1,g6070.t1,g6314.t1,g7320.t1,g7492.t1,g7668.t1,g8469.t1,g8572.t1,g9847.t1	1.010755651,0.772037949,2.645434198,1.249711279,-1.144543544,0.995120911,1.132724558,0.83304777,0.776000669,1.238412198,1.396302797,1.007511204,2.01513142,1.181251645,2.174315398,1.039496532,1.094162469,1.154708524,1.049031779,0.665511061,0.820459674,1.296071445,1.764419174,1.839864242
GO Process	GO:0006897	Endocytosis	29	219	2.2488	top	0.00029	ks	STRG0A56FBJ.g1054.t1,STRG0A56FBJ.g1054.t2,STRG0A56FBJ.g10731.t1,STRG0A56FBJ.g10903.t1,STRG0A56FBJ.g1114.t1,STRG0A56FBJ.g11828.t1,STRG0A56FBJ.g1184.t1,STRG0A56FBJ.g13530.t1,STRG0A56FBJ.g13970.t1,STRG0A56FBJ.g14943.t1,STRG0A56FBJ.g15023.t1,STRG0A56FBJ.g15310.t1,STRG0A56FBJ.g17015.t1,STRG0A56FBJ.g2241.t1,STRG0A56FBJ.g2262.t1,STRG0A56FBJ.g287.t1,STRG0A56FBJ.g3430.t1,STRG0A56FBJ.g3478.t1,STRG0A56FBJ.g…	g1054.t1,g1054.t2,g10731.t1,g10903.t1,g1114.t1,g11828.t1,g1184.t1,g13530.t1,g13970.t1,g14943.t1,g15023.t1,g15310.t1,g17015.t1,g2241.t1,g2262.t1,g287.t1,g3430.t1,g3478.t1,g3508.t1,g561.t1,g6373.t1,g6960.t1,g7000.t1,g755.t1,g7869.t1,g8015.t1,g8273.t1,g8489.t1,g8767.t1	g1054.t1,g1054.t2,g10731.t1,g10903.t1,g1114.t1,g11828.t1,g1184.t1,g13530.t1,g13970.t1,g14943.t1,g15023.t1,g15310.t1,g17015.t1,g2241.t1,g2262.t1,g287.t1,g3430.t1,g3478.t1,g3508.t1,g561.t1,g6373.t1,g6960.t1,g7000.t1,g755.t1,g7869.t1,g8015.t1,g8273.t1,g8489.t1,g8767.t1	-1.614412262,-2.291080842,-1.220928341,-1.602351617,-0.814607868,-2.507733117,-0.558880673,-1.193014371,-1.018052161,-2.153858476,-0.599932886,-1.799782587,-0.509713988,-1.995683715,-0.822619447,-1.212351065,-1.15440606,0.76997571,-1.645874695,-1.226384446,-0.809399598,-1.364151163,-1.082217888,-1.568461592,-2.06788916,-1.092581667,-1.138488431,-0.835400115,-1.975428129
GO Process	GO:0030317	Flagellated sperm motility	26	80	2.7991	top	0.0003	ks	STRG0A56FBJ.g10846.t1,STRG0A56FBJ.g10917.t1,STRG0A56FBJ.g10924.t1,STRG0A56FBJ.g1107.t1,STRG0A56FBJ.g1163.t1,STRG0A56FBJ.g11838.t1,STRG0A56FBJ.g14096.t1,STRG0A56FBJ.g14407.t1,STRG0A56FBJ.g14418.t1,STRG0A56FBJ.g14497.t1,STRG0A56FBJ.g14903.t1,STRG0A56FBJ.g15613.t1,STRG0A56FBJ.g15901.t1,STRG0A56FBJ.g15997.t1,STRG0A56FBJ.g3615.t1,STRG0A56FBJ.g4127.t1,STRG0A56FBJ.g4721.t1,STRG0A56FBJ.g4791.t1,STRG0A56F…	g10846.t1,g10917.t1,g10924.t1,g1107.t1,g1163.t1,g11838.t1,g14096.t1,g14407.t1,g14418.t1,g14497.t1,g14903.t1,g15613.t1,g15901.t1,g15997.t1,g3615.t1,g4127.t1,g4721.t1,g4791.t1,g5169.t1,g5208.t1,g5374.t1,g5404.t1,g5538.t1,g6188.t1,g7276.t1,g7532.t1	g10846.t1,g10917.t1,g10924.t1,g1107.t1,g1163.t1,g11838.t1,g14096.t1,g14407.t1,g14418.t1,g14497.t1,g14903.t1,g15613.t1,g15901.t1,g15997.t1,g3615.t1,g4127.t1,g4721.t1,g4791.t1,g5169.t1,g5208.t1,g5374.t1,g5404.t1,g5538.t1,g6188.t1,g7276.t1,g7532.t1	-1.738312781,-2.043393813,-1.822056587,-1.290666174,-3.157142953,0.904655247,-0.934510256,-4.29407144,-1.9227885,-0.679914888,-0.729194633,-1.657614944,-1.132956181,-1.763957211,-2.185771866,-2.270727405,-1.469284384,-0.967146033,-0.717229388,-1.443501782,-1.434516948,-1.459598006,-1.753789775,-1.628302558,-1.819704482,-1.099599309
GO Process	GO:1901362	Organic cyclic compound biosynthetic process	93	682	2.17054	bottom	0.0003	ks	STRG0A56FBJ.g10552.t1,STRG0A56FBJ.g10758.t1,STRG0A56FBJ.g10767.t1,STRG0A56FBJ.g11427.t1,STRG0A56FBJ.g11760.t1,STRG0A56FBJ.g11794.t1,STRG0A56FBJ.g11962.t1,STRG0A56FBJ.g11999.t1,STRG0A56FBJ.g1206.t1,STRG0A56FBJ.g12187.t1,STRG0A56FBJ.g12810.t1,STRG0A56FBJ.g12813.t1,STRG0A56FBJ.g12836.t1,STRG0A56FBJ.g13284.t1,STRG0A56FBJ.g13398.t1,STRG0A56FBJ.g13564.t1,STRG0A56FBJ.g13675.t1,STRG0A56FBJ.g13701.t1,STRG…	g10552.t1,g10758.t1,g10767.t1,g11427.t1,g11760.t1,g11794.t1,g11962.t1,g11999.t1,g1206.t1,g12187.t1,g12810.t1,g12813.t1,g12836.t1,g13284.t1,g13398.t1,g13564.t1,g13675.t1,g13701.t1,g1381.t1,g13973.t1,g14143.t1,g14176.t1,g14365.t1,g14886.t1,g14981.t1,g15022.t1,g15388.t1,g15496.t1,g16104.t1,g1628.t1,g1641.t1,g16589.t1,g16597.t1,g1706.t1,g1995.t1,g2175.t1,g22.t1,g22.t2,g2336.t1,g2485.t1,g2535.t1,g2794…	g10552.t1,g10758.t1,g10767.t1,g11427.t1,g11760.t1,g11794.t1,g11962.t1,g11999.t1,g1206.t1,g12187.t1,g12810.t1,g12813.t1,g12836.t1,g13284.t1,g13398.t1,g13564.t1,g13675.t1,g13701.t1,g1381.t1,g13973.t1,g14143.t1,g14176.t1,g14365.t1,g14886.t1,g14981.t1,g15022.t1,g15388.t1,g15496.t1,g16104.t1,g1628.t1,g1641.t1,g16589.t1,g16597.t1,g1706.t1,g1995.t1,g2175.t1,g22.t1,g22.t2,g2336.t1,g2485.t1,g2535.t1,g2794…	1.798344637,-1.275611172,-1.728501851,-1.548932509,2.803416794,-1.476143824,-1.144588371,0.877772701,0.896245211,1.274768331,0.746691933,3.136441327,2.872550878,0.993408531,1.171325089,1.623357739,0.992727049,0.751303856,-1.097426611,0.89763724,1.249711279,3.001770209,0.592831433,0.737221712,0.863436214,-0.77639797,-1.569593078,1.000409815,-3.170054807,1.533259053,1.739105484,1.403778701,1.457256…
GO Process	GO:0071897	DNA biosynthetic process	6	50	6.11002	bottom	0.00031	afc	STRG0A56FBJ.g12813.t1,STRG0A56FBJ.g13564.t1,STRG0A56FBJ.g2535.t1,STRG0A56FBJ.g5301.t1,STRG0A56FBJ.g5710.t1,STRG0A56FBJ.g6159.t1	g12813.t1,g13564.t1,g2535.t1,g5301.t1,g5710.t1,g6159.t1	g12813.t1,g13564.t1,g2535.t1,g5301.t1,g5710.t1,g6159.t1	3.136441327,1.623357739,3.100627509,2.271744918,0.750170095,1.583158939
GO Process	GO:0019395	Fatty acid oxidation	29	90	2.62309	top	0.00032	ks	STRG0A56FBJ.g10290.t1,STRG0A56FBJ.g10703.t1,STRG0A56FBJ.g11538.t1,STRG0A56FBJ.g12333.t1,STRG0A56FBJ.g12334.t1,STRG0A56FBJ.g12948.t1,STRG0A56FBJ.g13677.t1,STRG0A56FBJ.g14050.t1,STRG0A56FBJ.g14236.t1,STRG0A56FBJ.g14406.t1,STRG0A56FBJ.g15467.t1,STRG0A56FBJ.g15687.t1,STRG0A56FBJ.g15689.t1,STRG0A56FBJ.g16440.t1,STRG0A56FBJ.g16441.t1,STRG0A56FBJ.g16461.t1,STRG0A56FBJ.g2134.t1,STRG0A56FBJ.g2252.t1,STRG0…	g10290.t1,g10703.t1,g11538.t1,g12333.t1,g12334.t1,g12948.t1,g13677.t1,g14050.t1,g14236.t1,g14406.t1,g15467.t1,g15687.t1,g15689.t1,g16440.t1,g16441.t1,g16461.t1,g2134.t1,g2252.t1,g2342.t1,g3828.t1,g5518.t1,g6549.t1,g6737.t1,g749.t1,g7948.t1,g8541.t1,g8542.t1,g8741.t1,g9255.t1	g10290.t1,g10703.t1,g11538.t1,g12333.t1,g12334.t1,g12948.t1,g13677.t1,g14050.t1,g14236.t1,g14406.t1,g15467.t1,g15687.t1,g15689.t1,g16440.t1,g16441.t1,g16461.t1,g2134.t1,g2252.t1,g2342.t1,g3828.t1,g5518.t1,g6549.t1,g6737.t1,g749.t1,g7948.t1,g8541.t1,g8542.t1,g8741.t1,g9255.t1	-0.769387904,-1.622559879,-1.305824839,-1.392196703,-2.238113402,-1.69738072,-1.725429596,-0.603196985,-1.718221854,-2.519233849,-0.488832176,-2.166546217,-1.268511085,-2.253090461,-1.936063544,-2.445508714,-1.535293121,-1.361037985,-0.718571217,-1.39731617,0.896691268,-1.074903502,-1.82825595,-2.236267397,-0.890731245,-1.794909836,-1.658871611,-2.160386515,-0.69224213
GO Process	GO:0003008	System process	55	484	1.81882	top	0.00037	ks	STRG0A56FBJ.g10846.t1,STRG0A56FBJ.g10921.t1,STRG0A56FBJ.g10922.t1,STRG0A56FBJ.g11531.t1,STRG0A56FBJ.g11532.t1,STRG0A56FBJ.g11675.t1,STRG0A56FBJ.g11914.t1,STRG0A56FBJ.g11981.t1,STRG0A56FBJ.g12686.t1,STRG0A56FBJ.g12917.t1,STRG0A56FBJ.g12958.t1,STRG0A56FBJ.g13188.t1,STRG0A56FBJ.g13232.t1,STRG0A56FBJ.g13694.t1,STRG0A56FBJ.g14017.t1,STRG0A56FBJ.g1479.t1,STRG0A56FBJ.g15082.t1,STRG0A56FBJ.g15308.t1,STRG…	g10846.t1,g10921.t1,g10922.t1,g11531.t1,g11532.t1,g11675.t1,g11914.t1,g11981.t1,g12686.t1,g12917.t1,g12958.t1,g13188.t1,g13232.t1,g13694.t1,g14017.t1,g1479.t1,g15082.t1,g15308.t1,g15562.t1,g16095.t1,g16095.t3,g16456.t1,g17013.t1,g1972.t1,g2111.t1,g2141.t1,g2157.t1,g2174.t1,g2628.t1,g287.t1,g3466.t1,g3508.t1,g4049.t1,g4127.t1,g4219.t1,g4458.t1,g4791.t1,g5208.t1,g5930.t1,g6022.t1,g6061.t1,g6064.t1,…	g10846.t1,g10921.t1,g10922.t1,g11531.t1,g11532.t1,g11675.t1,g11914.t1,g11981.t1,g12686.t1,g12917.t1,g12958.t1,g13188.t1,g13232.t1,g13694.t1,g14017.t1,g1479.t1,g15082.t1,g15308.t1,g15562.t1,g16095.t1,g16095.t3,g16456.t1,g17013.t1,g1972.t1,g2111.t1,g2141.t1,g2157.t1,g2174.t1,g2628.t1,g287.t1,g3466.t1,g3508.t1,g4049.t1,g4127.t1,g4219.t1,g4458.t1,g4791.t1,g5208.t1,g5930.t1,g6022.t1,g6061.t1,g6064.t1,…	-1.738312781,-2.279717712,-2.260036243,-0.957180335,-1.839639071,-0.941109181,-1.526120692,-0.897011105,-1.487429083,1.126151849,1.163260983,-1.142462417,-1.600701384,-1.291342296,-1.154508988,-2.520916647,-0.883712077,-1.000636617,-0.673759346,-1.393923504,-0.65657216,-0.536542184,-2.248893291,-1.824851009,-1.024707524,1.090349565,-1.339020965,1.438168223,-1.623014387,-1.212351065,-1.610684843,-…
GO Process	GO:0043414	Macromolecule methylation	24	193	3.90355	bottom	0.00039	ks	STRG0A56FBJ.g11122.t1,STRG0A56FBJ.g11369.t1,STRG0A56FBJ.g12513.t1,STRG0A56FBJ.g12928.t1,STRG0A56FBJ.g13042.t1,STRG0A56FBJ.g13272.t1,STRG0A56FBJ.g13403.t1,STRG0A56FBJ.g13929.t1,STRG0A56FBJ.g15691.t1,STRG0A56FBJ.g16812.t1,STRG0A56FBJ.g1775.t1,STRG0A56FBJ.g2692.t1,STRG0A56FBJ.g2775.t1,STRG0A56FBJ.g2843.t1,STRG0A56FBJ.g3125.t1,STRG0A56FBJ.g4185.t1,STRG0A56FBJ.g5518.t1,STRG0A56FBJ.g5791.t1,STRG0A56FBJ…	g11122.t1,g11369.t1,g12513.t1,g12928.t1,g13042.t1,g13272.t1,g13403.t1,g13929.t1,g15691.t1,g16812.t1,g1775.t1,g2692.t1,g2775.t1,g2843.t1,g3125.t1,g4185.t1,g5518.t1,g5791.t1,g6345.t1,g7330.t1,g7631.t1,g8391.t1,g902.t1,g9160.t1	g11122.t1,g11369.t1,g12513.t1,g12928.t1,g13042.t1,g13272.t1,g13403.t1,g13929.t1,g15691.t1,g16812.t1,g1775.t1,g2692.t1,g2775.t1,g2843.t1,g3125.t1,g4185.t1,g5518.t1,g5791.t1,g6345.t1,g7330.t1,g7631.t1,g8391.t1,g902.t1,g9160.t1	-1.277151728,1.07180322,0.728606639,1.400562672,2.741363783,1.420638048,2.214116895,1.370464581,1.148016534,1.084108836,-1.652727769,1.439758596,2.311159974,2.508444172,2.154903887,1.473090771,0.896691268,2.035567487,1.195691954,1.42931143,1.693972121,0.827877741,1.378768847,1.045789749
GO Process	GO:0070647	Protein modification by small protein conjugation or removal	45	611	2.45238	bottom	0.0004	ks	STRG0A56FBJ.g10310.t1,STRG0A56FBJ.g10364.t1,STRG0A56FBJ.g10956.t1,STRG0A56FBJ.g1112.t1,STRG0A56FBJ.g12038.t1,STRG0A56FBJ.g12187.t1,STRG0A56FBJ.g12558.t1,STRG0A56FBJ.g13267.t1,STRG0A56FBJ.g13343.t1,STRG0A56FBJ.g14143.t1,STRG0A56FBJ.g14160.t1,STRG0A56FBJ.g14221.t1,STRG0A56FBJ.g14870.t1,STRG0A56FBJ.g1510.t1,STRG0A56FBJ.g15170.t1,STRG0A56FBJ.g1559.t1,STRG0A56FBJ.g15874.t1,STRG0A56FBJ.g15984.t1,STRG0A…	g10310.t1,g10364.t1,g10956.t1,g1112.t1,g12038.t1,g12187.t1,g12558.t1,g13267.t1,g13343.t1,g14143.t1,g14160.t1,g14221.t1,g14870.t1,g1510.t1,g15170.t1,g1559.t1,g15874.t1,g15984.t1,g16314.t1,g16614.t1,g1737.t1,g1746.t1,g1848.t1,g2691.t1,g2844.t1,g3781.t1,g4112.t1,g4812.t1,g5114.t1,g5465.t1,g5541.t1,g5758.t1,g6045.t1,g6170.t1,g6308.t1,g6746.t1,g6848.t1,g6883.t1,g6993.t1,g7117.t1,g7443.t1,g7991.t1,g849…	g10310.t1,g10364.t1,g10956.t1,g1112.t1,g12038.t1,g12187.t1,g12558.t1,g13267.t1,g13343.t1,g14143.t1,g14160.t1,g14221.t1,g14870.t1,g1510.t1,g15170.t1,g1559.t1,g15874.t1,g15984.t1,g16314.t1,g16614.t1,g1737.t1,g1746.t1,g1848.t1,g2691.t1,g2844.t1,g3781.t1,g4112.t1,g4812.t1,g5114.t1,g5465.t1,g5541.t1,g5758.t1,g6045.t1,g6170.t1,g6308.t1,g6746.t1,g6848.t1,g6883.t1,g6993.t1,g7117.t1,g7443.t1,g7991.t1,g849…	2.007165407,-1.022479236,1.294215006,2.352524127,0.907283634,1.274768331,1.340146323,0.866781681,1.096775086,1.249711279,1.410958354,1.277003378,-0.619959779,-0.644881443,1.171518274,1.203339787,0.956981837,0.655270485,1.018603077,0.80106601,1.053635861,0.91690786,0.898161113,1.487863113,1.603193747,0.87878332,1.322604391,-0.957135973,0.653864439,-1.572355532,-0.882270878,1.336477968,0.844720151,…
GO Process	GO:0043487	Regulation of RNA stability	20	76	3.72583	bottom	0.00042	afc	STRG0A56FBJ.g11285.t1,STRG0A56FBJ.g11953.t1,STRG0A56FBJ.g14118.t1,STRG0A56FBJ.g1441.t1,STRG0A56FBJ.g15033.t1,STRG0A56FBJ.g15227.t1,STRG0A56FBJ.g16382.t1,STRG0A56FBJ.g16664.t1,STRG0A56FBJ.g16882.t1,STRG0A56FBJ.g3125.t1,STRG0A56FBJ.g3152.t1,STRG0A56FBJ.g4896.t1,STRG0A56FBJ.g5088.t1,STRG0A56FBJ.g5301.t1,STRG0A56FBJ.g5775.t1,STRG0A56FBJ.g7283.t1,STRG0A56FBJ.g7601.t1,STRG0A56FBJ.g8189.t1,STRG0A56FBJ.g…	g11285.t1,g11953.t1,g14118.t1,g1441.t1,g15033.t1,g15227.t1,g16382.t1,g16664.t1,g16882.t1,g3125.t1,g3152.t1,g4896.t1,g5088.t1,g5301.t1,g5775.t1,g7283.t1,g7601.t1,g8189.t1,g8501.t1,g8833.t1	g11285.t1,g11953.t1,g14118.t1,g1441.t1,g15033.t1,g15227.t1,g16382.t1,g16664.t1,g16882.t1,g3125.t1,g3152.t1,g4896.t1,g5088.t1,g5301.t1,g5775.t1,g7283.t1,g7601.t1,g8189.t1,g8501.t1,g8833.t1	0.772037949,1.345128774,1.072258989,1.377012035,1.162423469,1.825505464,1.959919797,-2.180683348,0.899961293,2.154903887,0.893928334,1.480526783,1.659652199,2.271744918,0.922409522,2.44310085,1.246038332,0.687377784,1.50886069,0.73948922
GO Process	GO:0032206	Positive regulation of telomere maintenance	7	33	5.69767	bottom	0.00045	afc	STRG0A56FBJ.g14265.t1,STRG0A56FBJ.g14847.t1,STRG0A56FBJ.g16510.t1,STRG0A56FBJ.g16625.t1,STRG0A56FBJ.g16703.t1,STRG0A56FBJ.g1838.t1,STRG0A56FBJ.g5301.t1	g14265.t1,g14847.t1,g16510.t1,g16625.t1,g16703.t1,g1838.t1,g5301.t1	g14265.t1,g14847.t1,g16510.t1,g16625.t1,g16703.t1,g1838.t1,g5301.t1	2.109140945,2.079494856,2.262894324,2.107518908,1.854164198,0.809721044,2.271744918
GO Process	GO:0072329	Monocarboxylic acid catabolic process	32	90	2.43933	top	0.00045	ks	STRG0A56FBJ.g10290.t1,STRG0A56FBJ.g10703.t1,STRG0A56FBJ.g11538.t1,STRG0A56FBJ.g12333.t1,STRG0A56FBJ.g12334.t1,STRG0A56FBJ.g12881.t1,STRG0A56FBJ.g12948.t1,STRG0A56FBJ.g13232.t1,STRG0A56FBJ.g13677.t1,STRG0A56FBJ.g14050.t1,STRG0A56FBJ.g14236.t1,STRG0A56FBJ.g14406.t1,STRG0A56FBJ.g15058.t1,STRG0A56FBJ.g15467.t1,STRG0A56FBJ.g15687.t1,STRG0A56FBJ.g15689.t1,STRG0A56FBJ.g16440.t1,STRG0A56FBJ.g16441.t1,STR…	g10290.t1,g10703.t1,g11538.t1,g12333.t1,g12334.t1,g12881.t1,g12948.t1,g13232.t1,g13677.t1,g14050.t1,g14236.t1,g14406.t1,g15058.t1,g15467.t1,g15687.t1,g15689.t1,g16440.t1,g16441.t1,g16461.t1,g2134.t1,g2342.t1,g3828.t1,g5518.t1,g6165.t1,g6549.t1,g6737.t1,g749.t1,g7948.t1,g8541.t1,g8542.t1,g8741.t1,g9255.t1	g10290.t1,g10703.t1,g11538.t1,g12333.t1,g12334.t1,g12881.t1,g12948.t1,g13232.t1,g13677.t1,g14050.t1,g14236.t1,g14406.t1,g15058.t1,g15467.t1,g15687.t1,g15689.t1,g16440.t1,g16441.t1,g16461.t1,g2134.t1,g2342.t1,g3828.t1,g5518.t1,g6165.t1,g6549.t1,g6737.t1,g749.t1,g7948.t1,g8541.t1,g8542.t1,g8741.t1,g9255.t1	-0.769387904,-1.622559879,-1.305824839,-1.392196703,-2.238113402,1.009215292,-1.69738072,-1.600701384,-1.725429596,-0.603196985,-1.718221854,-2.519233849,-0.907349351,-0.488832176,-2.166546217,-1.268511085,-2.253090461,-1.936063544,-2.445508714,-1.535293121,-0.718571217,-1.39731617,0.896691268,-1.289921254,-1.074903502,-1.82825595,-2.236267397,-0.890731245,-1.794909836,-1.658871611,-2.160386515,-…
GO Process	GO:0010628	Positive regulation of gene expression	57	320	2.27761	bottom	0.00047	ks	STRG0A56FBJ.g10824.t1,STRG0A56FBJ.g11151.t1,STRG0A56FBJ.g11285.t1,STRG0A56FBJ.g11360.t1,STRG0A56FBJ.g11450.t1,STRG0A56FBJ.g11694.t1,STRG0A56FBJ.g11763.t1,STRG0A56FBJ.g11879.t1,STRG0A56FBJ.g11953.t1,STRG0A56FBJ.g12282.t1,STRG0A56FBJ.g12917.t1,STRG0A56FBJ.g13035.t1,STRG0A56FBJ.g13053.t1,STRG0A56FBJ.g13120.t1,STRG0A56FBJ.g13415.t1,STRG0A56FBJ.g13420.t1,STRG0A56FBJ.g14123.t1,STRG0A56FBJ.g14268.t1,STR…	g10824.t1,g11151.t1,g11285.t1,g11360.t1,g11450.t1,g11694.t1,g11763.t1,g11879.t1,g11953.t1,g12282.t1,g12917.t1,g13035.t1,g13053.t1,g13120.t1,g13415.t1,g13420.t1,g14123.t1,g14268.t1,g1441.t1,g15227.t1,g15553.t1,g15821.t1,g15828.t1,g15871.t1,g16037.t1,g1608.t1,g16456.t1,g16786.t1,g2006.t1,g2157.t1,g2311.t1,g2520.t1,g2542.t1,g3430.t1,g3466.t1,g3585.t1,g3646.t1,g4950.t1,g5088.t1,g5290.t1,g5710.t1,g577…	g10824.t1,g11151.t1,g11285.t1,g11360.t1,g11450.t1,g11694.t1,g11763.t1,g11879.t1,g11953.t1,g12282.t1,g12917.t1,g13035.t1,g13053.t1,g13120.t1,g13415.t1,g13420.t1,g14123.t1,g14268.t1,g1441.t1,g15227.t1,g15553.t1,g15821.t1,g15828.t1,g15871.t1,g16037.t1,g1608.t1,g16456.t1,g16786.t1,g2006.t1,g2157.t1,g2311.t1,g2520.t1,g2542.t1,g3430.t1,g3466.t1,g3585.t1,g3646.t1,g4950.t1,g5088.t1,g5290.t1,g5710.t1,g577…	3.076915162,0.667149877,0.772037949,-1.036951642,1.250435787,-1.220134787,0.951959336,0.886978057,1.345128774,1.11437724,1.126151849,1.345176512,0.93934618,1.388589858,1.223800632,-0.585097553,1.488579723,1.171657699,1.377012035,1.825505464,0.766026895,-1.099318525,-0.605570412,-1.389163794,0.617361382,-1.496946627,-0.536542184,1.140496005,0.719991361,-1.339020965,1.591407605,0.996657562,0.947145…
GO Process	GO:0006400	tRNA modification	12	87	4.62777	bottom	0.00048	afc	STRG0A56FBJ.g13042.t1,STRG0A56FBJ.g13718.t1,STRG0A56FBJ.g14243.t1,STRG0A56FBJ.g14888.t1,STRG0A56FBJ.g15397.t1,STRG0A56FBJ.g2232.t1,STRG0A56FBJ.g2311.t1,STRG0A56FBJ.g2667.t1,STRG0A56FBJ.g2692.t1,STRG0A56FBJ.g3125.t1,STRG0A56FBJ.g4179.t1,STRG0A56FBJ.g5518.t1	g13042.t1,g13718.t1,g14243.t1,g14888.t1,g15397.t1,g2232.t1,g2311.t1,g2667.t1,g2692.t1,g3125.t1,g4179.t1,g5518.t1	g13042.t1,g13718.t1,g14243.t1,g14888.t1,g15397.t1,g2232.t1,g2311.t1,g2667.t1,g2692.t1,g3125.t1,g4179.t1,g5518.t1	2.741363783,0.949910569,1.524443724,1.60276862,0.857327905,2.461318418,1.591407605,1.247370659,1.439758596,2.154903887,1.009281909,0.896691268
GO Process	GO:0031123	RNA 3-end processing	15	84	4.27168	bottom	0.00048	afc	STRG0A56FBJ.g12187.t1,STRG0A56FBJ.g13422.t1,STRG0A56FBJ.g16382.t1,STRG0A56FBJ.g2843.t1,STRG0A56FBJ.g3830.t1,STRG0A56FBJ.g5228.t1,STRG0A56FBJ.g5301.t1,STRG0A56FBJ.g5518.t1,STRG0A56FBJ.g5519.t1,STRG0A56FBJ.g5600.t1,STRG0A56FBJ.g5700.t1,STRG0A56FBJ.g5753.t1,STRG0A56FBJ.g7601.t1,STRG0A56FBJ.g7640.t1,STRG0A56FBJ.g8501.t1	g12187.t1,g13422.t1,g16382.t1,g2843.t1,g3830.t1,g5228.t1,g5301.t1,g5518.t1,g5519.t1,g5600.t1,g5700.t1,g5753.t1,g7601.t1,g7640.t1,g8501.t1	g12187.t1,g13422.t1,g16382.t1,g2843.t1,g3830.t1,g5228.t1,g5301.t1,g5518.t1,g5519.t1,g5600.t1,g5700.t1,g5753.t1,g7601.t1,g7640.t1,g8501.t1	1.274768331,1.180597013,1.959919797,2.508444172,1.178909648,1.84676331,2.271744918,0.896691268,0.904071639,-0.953401937,1.571754604,2.174315398,1.246038332,1.587537929,1.50886069
GO Process	GO:0043436	Oxoacid metabolic process	153	764	0.763591	top	0.00051	ks	STRG0A56FBJ.g10290.t1,STRG0A56FBJ.g10468.t1,STRG0A56FBJ.g10690.t1,STRG0A56FBJ.g10703.t1,STRG0A56FBJ.g10833.t1,STRG0A56FBJ.g10839.t1,STRG0A56FBJ.g109.t1,STRG0A56FBJ.g11126.t1,STRG0A56FBJ.g11200.t1,STRG0A56FBJ.g11511.t1,STRG0A56FBJ.g11538.t1,STRG0A56FBJ.g11541.t1,STRG0A56FBJ.g11543.t1,STRG0A56FBJ.g11588.t1,STRG0A56FBJ.g11601.t1,STRG0A56FBJ.g11916.t1,STRG0A56FBJ.g11947.t1,STRG0A56FBJ.g11999.t1,STRG0…	g10290.t1,g10468.t1,g10690.t1,g10703.t1,g10833.t1,g10839.t1,g109.t1,g11126.t1,g11200.t1,g11511.t1,g11538.t1,g11541.t1,g11543.t1,g11588.t1,g11601.t1,g11916.t1,g11947.t1,g11999.t1,g12080.t1,g12096.t1,g1226.t1,g12333.t1,g12334.t1,g12540.t1,g12552.t1,g12684.t1,g12836.t1,g12869.t1,g12881.t1,g12948.t1,g13018.t1,g13138.t1,g13232.t1,g13556.t1,g13558.t1,g13559.t1,g13644.t1,g13677.t1,g13701.t1,g13718.t1,g1…	g10290.t1,g10468.t1,g10690.t1,g10703.t1,g10833.t1,g10839.t1,g109.t1,g11126.t1,g11200.t1,g11511.t1,g11538.t1,g11541.t1,g11543.t1,g11588.t1,g11601.t1,g11916.t1,g11947.t1,g11999.t1,g12080.t1,g12096.t1,g1226.t1,g12333.t1,g12334.t1,g12540.t1,g12552.t1,g12684.t1,g12836.t1,g12869.t1,g12881.t1,g12948.t1,g13018.t1,g13138.t1,g13232.t1,g13556.t1,g13558.t1,g13559.t1,g13644.t1,g13677.t1,g13701.t1,g13718.t1,g1…	-0.769387904,1.077131847,-1.012187087,-1.622559879,-1.2972136,0.588116581,0.979392542,-0.871471982,0.787680476,0.840257483,-1.305824839,-2.409930835,-2.283875353,-1.674451582,-1.976102221,-1.630163172,1.82203744,0.877772701,-1.983173447,-1.143696305,0.906831892,-1.392196703,-2.238113402,-0.954691762,0.570731486,1.308750176,2.872550878,-1.732083659,1.009215292,-1.69738072,-2.233983689,1.674839412,…
GO Process	GO:0000463	Maturation of LSU-rRNA from tricistronic rRNA transcript (SSU-rRNA, 5.8S rRNA, LSU-rRNA)	8	17	5.53614	bottom	0.00052	afc	STRG0A56FBJ.g13127.t1,STRG0A56FBJ.g3054.t1,STRG0A56FBJ.g4790.t1,STRG0A56FBJ.g6819.t1,STRG0A56FBJ.g6895.t1,STRG0A56FBJ.g7992.t1,STRG0A56FBJ.g8646.t1,STRG0A56FBJ.g9010.t1	g13127.t1,g3054.t1,g4790.t1,g6819.t1,g6895.t1,g7992.t1,g8646.t1,g9010.t1	g13127.t1,g3054.t1,g4790.t1,g6819.t1,g6895.t1,g7992.t1,g8646.t1,g9010.t1	1.027408517,1.291321052,1.409661795,2.884532399,1.947776396,2.233619539,1.972004404,2.190687016
GO Process	GO:0000460	Maturation of 5.8S rRNA	10	33	4.96574	bottom	0.00055	afc	STRG0A56FBJ.g16382.t1,STRG0A56FBJ.g2471.t1,STRG0A56FBJ.g3054.t1,STRG0A56FBJ.g3860.t1,STRG0A56FBJ.g6314.t1,STRG0A56FBJ.g6819.t1,STRG0A56FBJ.g7601.t1,STRG0A56FBJ.g7703.t1,STRG0A56FBJ.g8501.t1,STRG0A56FBJ.g9010.t1	g16382.t1,g2471.t1,g3054.t1,g3860.t1,g6314.t1,g6819.t1,g7601.t1,g7703.t1,g8501.t1,g9010.t1	g16382.t1,g2471.t1,g3054.t1,g3860.t1,g6314.t1,g6819.t1,g7601.t1,g7703.t1,g8501.t1,g9010.t1	1.959919797,1.75098948,1.291321052,1.206235662,1.154708524,2.884532399,1.246038332,1.430248271,1.50886069,2.190687016
GO Process	GO:0030163	Protein catabolic process	66	458	1.39105	bottom	0.00056	ks	STRG0A56FBJ.g10276.t1,STRG0A56FBJ.g10278.t1,STRG0A56FBJ.g10310.t1,STRG0A56FBJ.g10976.t1,STRG0A56FBJ.g11432.t1,STRG0A56FBJ.g11434.t1,STRG0A56FBJ.g12552.t1,STRG0A56FBJ.g12683.t1,STRG0A56FBJ.g12895.t1,STRG0A56FBJ.g13343.t1,STRG0A56FBJ.g13459.t1,STRG0A56FBJ.g13460.t1,STRG0A56FBJ.g13905.t1,STRG0A56FBJ.g1394.t1,STRG0A56FBJ.g14156.t1,STRG0A56FBJ.g14221.t1,STRG0A56FBJ.g14262.t1,STRG0A56FBJ.g14870.t1,STRG…	g10276.t1,g10278.t1,g10310.t1,g10976.t1,g11432.t1,g11434.t1,g12552.t1,g12683.t1,g12895.t1,g13343.t1,g13459.t1,g13460.t1,g13905.t1,g1394.t1,g14156.t1,g14221.t1,g14262.t1,g14870.t1,g1510.t1,g15170.t1,g15359.t1,g15390.t1,g1559.t1,g15900.t1,g15904.t1,g1608.t1,g16154.t1,g16314.t1,g16330.t1,g16735.t1,g16753.t1,g1932.t1,g1972.t1,g2004.t1,g2007.t1,g2886.t1,g3509.t1,g4171.t1,g4284.t1,g4294.t1,g4468.t1,g45…	g10276.t1,g10278.t1,g10310.t1,g10976.t1,g11432.t1,g11434.t1,g12552.t1,g12683.t1,g12895.t1,g13343.t1,g13459.t1,g13460.t1,g13905.t1,g1394.t1,g14156.t1,g14221.t1,g14262.t1,g14870.t1,g1510.t1,g15170.t1,g15359.t1,g15390.t1,g1559.t1,g15900.t1,g15904.t1,g1608.t1,g16154.t1,g16314.t1,g16330.t1,g16735.t1,g16753.t1,g1932.t1,g1972.t1,g2004.t1,g2007.t1,g2886.t1,g3509.t1,g4171.t1,g4284.t1,g4294.t1,g4468.t1,g45…	0.911242154,1.189426926,2.007165407,-1.797248481,-2.434477051,-2.415788799,0.570731486,0.860301544,1.165233075,1.096775086,1.102235089,0.805829882,0.735627922,0.832927726,0.728040913,1.277003378,0.996871352,-0.619959779,-0.644881443,1.171518274,0.983277348,1.170458803,1.203339787,0.785747421,1.078733911,-1.496946627,1.301316917,1.018603077,0.659019212,0.936374204,0.632375979,0.786041321,-1.824851…
GO Process	GO:0044282	Small molecule catabolic process	76	282	1.34817	top	0.00062	ks	STRG0A56FBJ.g10290.t1,STRG0A56FBJ.g10468.t1,STRG0A56FBJ.g10703.t1,STRG0A56FBJ.g10767.t1,STRG0A56FBJ.g10833.t1,STRG0A56FBJ.g109.t1,STRG0A56FBJ.g11511.t1,STRG0A56FBJ.g11538.t1,STRG0A56FBJ.g12333.t1,STRG0A56FBJ.g12334.t1,STRG0A56FBJ.g12881.t1,STRG0A56FBJ.g12948.t1,STRG0A56FBJ.g13018.t1,STRG0A56FBJ.g13232.t1,STRG0A56FBJ.g13677.t1,STRG0A56FBJ.g13701.t1,STRG0A56FBJ.g14050.t1,STRG0A56FBJ.g14236.t1,STRG0…	g10290.t1,g10468.t1,g10703.t1,g10767.t1,g10833.t1,g109.t1,g11511.t1,g11538.t1,g12333.t1,g12334.t1,g12881.t1,g12948.t1,g13018.t1,g13232.t1,g13677.t1,g13701.t1,g14050.t1,g14236.t1,g14406.t1,g14958.t1,g15022.t1,g15058.t1,g15325.t1,g15388.t1,g15467.t1,g15492.t1,g15572.t1,g15687.t1,g15689.t1,g1613.t1,g16440.t1,g16441.t1,g16461.t1,g16749.t1,g16903.t1,g2134.t1,g2342.t1,g2380.t1,g2444.t1,g2628.t1,g2739.t…	g10290.t1,g10468.t1,g10703.t1,g10767.t1,g10833.t1,g109.t1,g11511.t1,g11538.t1,g12333.t1,g12334.t1,g12881.t1,g12948.t1,g13018.t1,g13232.t1,g13677.t1,g13701.t1,g14050.t1,g14236.t1,g14406.t1,g14958.t1,g15022.t1,g15058.t1,g15325.t1,g15388.t1,g15467.t1,g15492.t1,g15572.t1,g15687.t1,g15689.t1,g1613.t1,g16440.t1,g16441.t1,g16461.t1,g16749.t1,g16903.t1,g2134.t1,g2342.t1,g2380.t1,g2444.t1,g2628.t1,g2739.t…	-0.769387904,1.077131847,-1.622559879,-1.728501851,-1.2972136,0.979392542,0.840257483,-1.305824839,-1.392196703,-2.238113402,1.009215292,-1.69738072,-2.233983689,-1.600701384,-1.725429596,0.751303856,-0.603196985,-1.718221854,-2.519233849,-0.68950469,-0.77639797,-0.907349351,-0.617674313,-1.569593078,-0.488832176,-1.797837805,0.438822754,-2.166546217,-1.268511085,-1.680504699,-2.253090461,-1.9360…
GO Process	GO:0070202	Regulation of establishment of protein localization to chromosome	5	8	6.35448	bottom	0.00062	afc	STRG0A56FBJ.g14265.t1,STRG0A56FBJ.g14847.t1,STRG0A56FBJ.g16510.t1,STRG0A56FBJ.g16625.t1,STRG0A56FBJ.g5301.t1	g14265.t1,g14847.t1,g16510.t1,g16625.t1,g5301.t1	g14265.t1,g14847.t1,g16510.t1,g16625.t1,g5301.t1	2.109140945,2.079494856,2.262894324,2.107518908,2.271744918
GO Process	GO:0042445	Hormone metabolic process	21	96	2.56876	top	0.00065	ks	STRG0A56FBJ.g10703.t1,STRG0A56FBJ.g11608.t1,STRG0A56FBJ.g11609.t1,STRG0A56FBJ.g11658.t1,STRG0A56FBJ.g11723.t1,STRG0A56FBJ.g12338.t1,STRG0A56FBJ.g12344.t1,STRG0A56FBJ.g12345.t1,STRG0A56FBJ.g14349.t1,STRG0A56FBJ.g14474.t1,STRG0A56FBJ.g14475.t1,STRG0A56FBJ.g1495.t1,STRG0A56FBJ.g1496.t1,STRG0A56FBJ.g16001.t1,STRG0A56FBJ.g1706.t1,STRG0A56FBJ.g3402.t1,STRG0A56FBJ.g3403.t1,STRG0A56FBJ.g5518.t1,STRG0A56F…	g10703.t1,g11608.t1,g11609.t1,g11658.t1,g11723.t1,g12338.t1,g12344.t1,g12345.t1,g14349.t1,g14474.t1,g14475.t1,g1495.t1,g1496.t1,g16001.t1,g1706.t1,g3402.t1,g3403.t1,g5518.t1,g5612.t1,g7154.t1,g8467.t1	g10703.t1,g11608.t1,g11609.t1,g11658.t1,g11723.t1,g12338.t1,g12344.t1,g12345.t1,g14349.t1,g14474.t1,g14475.t1,g1495.t1,g1496.t1,g16001.t1,g1706.t1,g3402.t1,g3403.t1,g5518.t1,g5612.t1,g7154.t1,g8467.t1	-1.622559879,-2.458708054,-1.560342674,0.708569642,-1.707625266,-1.893806679,-2.252173554,-1.298621144,-1.53348795,-2.242063833,-1.835245504,-2.768579105,-2.318726146,-1.538458753,-1.086095874,-1.045961509,-1.833767443,0.896691268,1.144041888,-1.573567319,-2.450210659
GO Process	GO:1903313	Positive regulation of mRNA metabolic process	23	61	3.23285	bottom	0.00068	ks	STRG0A56FBJ.g10824.t1,STRG0A56FBJ.g11285.t1,STRG0A56FBJ.g11879.t1,STRG0A56FBJ.g12187.t1,STRG0A56FBJ.g13035.t1,STRG0A56FBJ.g14118.t1,STRG0A56FBJ.g1441.t1,STRG0A56FBJ.g15033.t1,STRG0A56FBJ.g15553.t1,STRG0A56FBJ.g16037.t1,STRG0A56FBJ.g16382.t1,STRG0A56FBJ.g16664.t1,STRG0A56FBJ.g16882.t1,STRG0A56FBJ.g3152.t1,STRG0A56FBJ.g3830.t1,STRG0A56FBJ.g5130.t1,STRG0A56FBJ.g5775.t1,STRG0A56FBJ.g5836.t1,STRG0A56F…	g10824.t1,g11285.t1,g11879.t1,g12187.t1,g13035.t1,g14118.t1,g1441.t1,g15033.t1,g15553.t1,g16037.t1,g16382.t1,g16664.t1,g16882.t1,g3152.t1,g3830.t1,g5130.t1,g5775.t1,g5836.t1,g7601.t1,g8501.t1,g8833.t1,g8852.t1,g989.t1	g10824.t1,g11285.t1,g11879.t1,g12187.t1,g13035.t1,g14118.t1,g1441.t1,g15033.t1,g15553.t1,g16037.t1,g16382.t1,g16664.t1,g16882.t1,g3152.t1,g3830.t1,g5130.t1,g5775.t1,g5836.t1,g7601.t1,g8501.t1,g8833.t1,g8852.t1,g989.t1	3.076915162,0.772037949,0.886978057,1.274768331,1.345176512,1.072258989,1.377012035,1.162423469,0.766026895,0.617361382,1.959919797,-2.180683348,0.899961293,0.893928334,1.178909648,1.177666374,0.922409522,1.000989757,1.246038332,1.50886069,0.73948922,0.995346924,1.07071366
GO Process	GO:0042398	Cellular modified amino acid biosynthetic process	4	60	5.80958	top	0.00069	afc	STRG0A56FBJ.g10280.t1,STRG0A56FBJ.g16131.t1,STRG0A56FBJ.g3059.t1,STRG0A56FBJ.g4427.t1	g10280.t1,g16131.t1,g3059.t1,g4427.t1	g10280.t1,g16131.t1,g3059.t1,g4427.t1	-1.100968618,-2.506592586,-3.516680651,-5.20475451
GO Process	GO:0001510	RNA methylation	8	79	5.35213	bottom	0.00075	afc	STRG0A56FBJ.g13042.t1,STRG0A56FBJ.g13272.t1,STRG0A56FBJ.g13403.t1,STRG0A56FBJ.g2692.t1,STRG0A56FBJ.g2843.t1,STRG0A56FBJ.g3125.t1,STRG0A56FBJ.g5518.t1,STRG0A56FBJ.g9160.t1	g13042.t1,g13272.t1,g13403.t1,g2692.t1,g2843.t1,g3125.t1,g5518.t1,g9160.t1	g13042.t1,g13272.t1,g13403.t1,g2692.t1,g2843.t1,g3125.t1,g5518.t1,g9160.t1	2.741363783,1.420638048,2.214116895,1.439758596,2.508444172,2.154903887,0.896691268,1.045789749
GO Process	GO:0071824	protein-DNA complex subunit organization	19	91	3.72074	bottom	0.00078	afc	STRG0A56FBJ.g11926.t1,STRG0A56FBJ.g13279.t1,STRG0A56FBJ.g13480.t1,STRG0A56FBJ.g13973.t1,STRG0A56FBJ.g14053.t1,STRG0A56FBJ.g15039.t1,STRG0A56FBJ.g2291.t1,STRG0A56FBJ.g3271.t1,STRG0A56FBJ.g3309.t1,STRG0A56FBJ.g5774.t1,STRG0A56FBJ.g5995.t1,STRG0A56FBJ.g6221.t1,STRG0A56FBJ.g6691.t1,STRG0A56FBJ.g6719.t1,STRG0A56FBJ.g7531.t1,STRG0A56FBJ.g8245.t1,STRG0A56FBJ.g8283.t1,STRG0A56FBJ.g8924.t1,STRG0A56FBJ.g99…	g11926.t1,g13279.t1,g13480.t1,g13973.t1,g14053.t1,g15039.t1,g2291.t1,g3271.t1,g3309.t1,g5774.t1,g5995.t1,g6221.t1,g6691.t1,g6719.t1,g7531.t1,g8245.t1,g8283.t1,g8924.t1,g992.t1	g11926.t1,g13279.t1,g13480.t1,g13973.t1,g14053.t1,g15039.t1,g2291.t1,g3271.t1,g3309.t1,g5774.t1,g5995.t1,g6221.t1,g6691.t1,g6719.t1,g7531.t1,g8245.t1,g8283.t1,g8924.t1,g992.t1	1.048116873,2.9608896,1.083975433,0.89763724,1.403403191,1.39339247,1.180377591,2.204611404,0.769002692,-3.59167108,0.728730283,2.150819301,1.028068556,0.913792047,1.998676726,2.96905522,0.814753642,1.051253324,1.991254838
GO Process	GO:0045727	Positive regulation of translation	20	60	3.62188	bottom	0.00081	afc	STRG0A56FBJ.g11151.t1,STRG0A56FBJ.g11763.t1,STRG0A56FBJ.g12282.t1,STRG0A56FBJ.g13415.t1,STRG0A56FBJ.g14268.t1,STRG0A56FBJ.g1441.t1,STRG0A56FBJ.g16786.t1,STRG0A56FBJ.g2311.t1,STRG0A56FBJ.g2542.t1,STRG0A56FBJ.g3646.t1,STRG0A56FBJ.g5088.t1,STRG0A56FBJ.g6074.t1,STRG0A56FBJ.g6314.t1,STRG0A56FBJ.g7492.t1,STRG0A56FBJ.g7859.t1,STRG0A56FBJ.g8151.t1,STRG0A56FBJ.g8189.t1,STRG0A56FBJ.g8899.t1,STRG0A56FBJ.g88…	g11151.t1,g11763.t1,g12282.t1,g13415.t1,g14268.t1,g1441.t1,g16786.t1,g2311.t1,g2542.t1,g3646.t1,g5088.t1,g6074.t1,g6314.t1,g7492.t1,g7859.t1,g8151.t1,g8189.t1,g8899.t1,g8899.t2,g989.t1	g11151.t1,g11763.t1,g12282.t1,g13415.t1,g14268.t1,g1441.t1,g16786.t1,g2311.t1,g2542.t1,g3646.t1,g5088.t1,g6074.t1,g6314.t1,g7492.t1,g7859.t1,g8151.t1,g8189.t1,g8899.t1,g8899.t2,g989.t1	0.667149877,0.951959336,1.11437724,1.223800632,1.171657699,1.377012035,1.140496005,1.591407605,0.947145543,1.298419329,1.659652199,1.957874162,1.154708524,0.665511061,1.091668796,2.034655471,0.687377784,0.866737309,0.817729744,1.07071366
GO Process	GO:0006473	Protein acetylation	13	92	4.30175	bottom	0.00087	afc	STRG0A56FBJ.g12525.t1,STRG0A56FBJ.g13279.t1,STRG0A56FBJ.g13554.t1,STRG0A56FBJ.g13973.t1,STRG0A56FBJ.g15843.t1,STRG0A56FBJ.g16703.t1,STRG0A56FBJ.g17000.t1,STRG0A56FBJ.g2311.t1,STRG0A56FBJ.g4172.t1,STRG0A56FBJ.g5013.t1,STRG0A56FBJ.g5328.t1,STRG0A56FBJ.g6024.t1,STRG0A56FBJ.g9891.t1	g12525.t1,g13279.t1,g13554.t1,g13973.t1,g15843.t1,g16703.t1,g17000.t1,g2311.t1,g4172.t1,g5013.t1,g5328.t1,g6024.t1,g9891.t1	g12525.t1,g13279.t1,g13554.t1,g13973.t1,g15843.t1,g16703.t1,g17000.t1,g2311.t1,g4172.t1,g5013.t1,g5328.t1,g6024.t1,g9891.t1	1.33218056,2.9608896,1.322662897,0.89763724,1.285016679,1.854164198,0.98270224,1.591407605,0.960838419,1.809277871,1.408926464,1.071841893,1.000935899
GO Process	GO:0009894	Regulation of catabolic process	64	366	1.90742	bottom	0.00087	ks	STRG0A56FBJ.g10334.t1,STRG0A56FBJ.g109.t1,STRG0A56FBJ.g10978.t1,STRG0A56FBJ.g11285.t1,STRG0A56FBJ.g11440.t1,STRG0A56FBJ.g11953.t1,STRG0A56FBJ.g11987.t1,STRG0A56FBJ.g12120.t1,STRG0A56FBJ.g12296.t1,STRG0A56FBJ.g12895.t1,STRG0A56FBJ.g12948.t1,STRG0A56FBJ.g13267.t1,STRG0A56FBJ.g13436.t1,STRG0A56FBJ.g14118.t1,STRG0A56FBJ.g1441.t1,STRG0A56FBJ.g15033.t1,STRG0A56FBJ.g15059.t1,STRG0A56FBJ.g15227.t1,STRG0A…	g10334.t1,g109.t1,g10978.t1,g11285.t1,g11440.t1,g11953.t1,g11987.t1,g12120.t1,g12296.t1,g12895.t1,g12948.t1,g13267.t1,g13436.t1,g14118.t1,g1441.t1,g15033.t1,g15059.t1,g15227.t1,g1559.t1,g15904.t1,g16330.t1,g16382.t1,g16664.t1,g16882.t1,g16965.t1,g1817.t1,g2004.t1,g2175.t1,g2329.t1,g287.t1,g3125.t1,g3152.t1,g3430.t1,g4396.t1,g4505.t1,g4812.t1,g4896.t1,g5088.t1,g5130.t1,g5137.t1,g5301.t1,g5710.t1,g…	g10334.t1,g109.t1,g10978.t1,g11285.t1,g11440.t1,g11953.t1,g11987.t1,g12120.t1,g12296.t1,g12895.t1,g12948.t1,g13267.t1,g13436.t1,g14118.t1,g1441.t1,g15033.t1,g15059.t1,g15227.t1,g1559.t1,g15904.t1,g16330.t1,g16382.t1,g16664.t1,g16882.t1,g16965.t1,g1817.t1,g2004.t1,g2175.t1,g2329.t1,g287.t1,g3125.t1,g3152.t1,g3430.t1,g4396.t1,g4505.t1,g4812.t1,g4896.t1,g5088.t1,g5130.t1,g5137.t1,g5301.t1,g5710.t1,g…	0.980851571,0.979392542,-1.79462914,0.772037949,-1.577533877,1.345128774,-1.357705498,-0.771826468,0.987723101,1.165233075,-1.69738072,0.866781681,0.822029766,1.072258989,1.377012035,1.162423469,-1.498323204,1.825505464,1.203339787,1.078733911,0.659019212,1.959919797,-2.180683348,0.899961293,1.300638842,-1.622564261,1.023713969,0.942603195,1.652642254,-1.212351065,2.154903887,0.893928334,-1.15440…
GO Process	GO:2000573	Positive regulation of DNA biosynthetic process	8	35	5.3101	bottom	0.00091	afc	STRG0A56FBJ.g14265.t1,STRG0A56FBJ.g14847.t1,STRG0A56FBJ.g16510.t1,STRG0A56FBJ.g16625.t1,STRG0A56FBJ.g16727.t1,STRG0A56FBJ.g1838.t1,STRG0A56FBJ.g5301.t1,STRG0A56FBJ.g8257.t1	g14265.t1,g14847.t1,g16510.t1,g16625.t1,g16727.t1,g1838.t1,g5301.t1,g8257.t1	g14265.t1,g14847.t1,g16510.t1,g16625.t1,g16727.t1,g1838.t1,g5301.t1,g8257.t1	2.109140945,2.079494856,2.262894324,2.107518908,0.677920055,0.809721044,2.271744918,1.978067575
GO Process	GO:0019752	Carboxylic acid metabolic process	148	750	0.665531	top	0.00099	ks	STRG0A56FBJ.g10290.t1,STRG0A56FBJ.g10468.t1,STRG0A56FBJ.g10690.t1,STRG0A56FBJ.g10703.t1,STRG0A56FBJ.g10833.t1,STRG0A56FBJ.g10839.t1,STRG0A56FBJ.g109.t1,STRG0A56FBJ.g11126.t1,STRG0A56FBJ.g11200.t1,STRG0A56FBJ.g11511.t1,STRG0A56FBJ.g11538.t1,STRG0A56FBJ.g11541.t1,STRG0A56FBJ.g11543.t1,STRG0A56FBJ.g11588.t1,STRG0A56FBJ.g11601.t1,STRG0A56FBJ.g11916.t1,STRG0A56FBJ.g11947.t1,STRG0A56FBJ.g11999.t1,STRG0…	g10290.t1,g10468.t1,g10690.t1,g10703.t1,g10833.t1,g10839.t1,g109.t1,g11126.t1,g11200.t1,g11511.t1,g11538.t1,g11541.t1,g11543.t1,g11588.t1,g11601.t1,g11916.t1,g11947.t1,g11999.t1,g12080.t1,g12096.t1,g1226.t1,g12333.t1,g12334.t1,g12540.t1,g12552.t1,g12684.t1,g12836.t1,g12869.t1,g12881.t1,g12948.t1,g13018.t1,g13138.t1,g13232.t1,g13644.t1,g13677.t1,g13701.t1,g13718.t1,g1381.t1,g14050.t1,g14236.t1,g14…	g10290.t1,g10468.t1,g10690.t1,g10703.t1,g10833.t1,g10839.t1,g109.t1,g11126.t1,g11200.t1,g11511.t1,g11538.t1,g11541.t1,g11543.t1,g11588.t1,g11601.t1,g11916.t1,g11947.t1,g11999.t1,g12080.t1,g12096.t1,g1226.t1,g12333.t1,g12334.t1,g12540.t1,g12552.t1,g12684.t1,g12836.t1,g12869.t1,g12881.t1,g12948.t1,g13018.t1,g13138.t1,g13232.t1,g13644.t1,g13677.t1,g13701.t1,g13718.t1,g1381.t1,g14050.t1,g14236.t1,g14…	-0.769387904,1.077131847,-1.012187087,-1.622559879,-1.2972136,0.588116581,0.979392542,-0.871471982,0.787680476,0.840257483,-1.305824839,-2.409930835,-2.283875353,-1.674451582,-1.976102221,-1.630163172,1.82203744,0.877772701,-1.983173447,-1.143696305,0.906831892,-1.392196703,-2.238113402,-0.954691762,0.570731486,1.308750176,2.872550878,-1.732083659,1.009215292,-1.69738072,-2.233983689,1.674839412,…
GO Process	GO:0003013	Circulatory system process	19	116	2.72884	top	0.001	afc	STRG0A56FBJ.g10921.t1,STRG0A56FBJ.g10922.t1,STRG0A56FBJ.g11531.t1,STRG0A56FBJ.g11532.t1,STRG0A56FBJ.g13188.t1,STRG0A56FBJ.g13232.t1,STRG0A56FBJ.g13694.t1,STRG0A56FBJ.g14017.t1,STRG0A56FBJ.g15082.t1,STRG0A56FBJ.g2157.t1,STRG0A56FBJ.g2628.t1,STRG0A56FBJ.g4049.t1,STRG0A56FBJ.g7460.t1,STRG0A56FBJ.g7463.t1,STRG0A56FBJ.g7464.t1,STRG0A56FBJ.g7926.t1,STRG0A56FBJ.g9203.t1,STRG0A56FBJ.g9204.t1,STRG0A56FBJ.…	g10921.t1,g10922.t1,g11531.t1,g11532.t1,g13188.t1,g13232.t1,g13694.t1,g14017.t1,g15082.t1,g2157.t1,g2628.t1,g4049.t1,g7460.t1,g7463.t1,g7464.t1,g7926.t1,g9203.t1,g9204.t1,g9705.t1	g10921.t1,g10922.t1,g11531.t1,g11532.t1,g13188.t1,g13232.t1,g13694.t1,g14017.t1,g15082.t1,g2157.t1,g2628.t1,g4049.t1,g7460.t1,g7463.t1,g7464.t1,g7926.t1,g9203.t1,g9204.t1,g9705.t1	-2.279717712,-2.260036243,-0.957180335,-1.839639071,-1.142462417,-1.600701384,-1.291342296,-1.154508988,-0.883712077,-1.339020965,-1.623014387,-1.902540373,-1.158221176,-1.173539629,-3.126647034,-2.034138954,-2.099906736,-2.16823055,1.108294187
GO Process	GO:0051054	Positive regulation of DNA metabolic process	17	144	3.82887	bottom	0.001	afc	STRG0A56FBJ.g12837.t1,STRG0A56FBJ.g13390.t1,STRG0A56FBJ.g14265.t1,STRG0A56FBJ.g14847.t1,STRG0A56FBJ.g16510.t1,STRG0A56FBJ.g16625.t1,STRG0A56FBJ.g16703.t1,STRG0A56FBJ.g16727.t1,STRG0A56FBJ.g1838.t1,STRG0A56FBJ.g2291.t1,STRG0A56FBJ.g2520.t1,STRG0A56FBJ.g4458.t1,STRG0A56FBJ.g5301.t1,STRG0A56FBJ.g6776.t1,STRG0A56FBJ.g8189.t1,STRG0A56FBJ.g8257.t1,STRG0A56FBJ.g9891.t1	g12837.t1,g13390.t1,g14265.t1,g14847.t1,g16510.t1,g16625.t1,g16703.t1,g16727.t1,g1838.t1,g2291.t1,g2520.t1,g4458.t1,g5301.t1,g6776.t1,g8189.t1,g8257.t1,g9891.t1	g12837.t1,g13390.t1,g14265.t1,g14847.t1,g16510.t1,g16625.t1,g16703.t1,g16727.t1,g1838.t1,g2291.t1,g2520.t1,g4458.t1,g5301.t1,g6776.t1,g8189.t1,g8257.t1,g9891.t1	1.198708879,-0.56891928,2.109140945,2.079494856,2.262894324,2.107518908,1.854164198,0.677920055,0.809721044,1.180377591,0.996657562,-0.809905791,2.271744918,1.404644675,0.687377784,1.978067575,1.000935899
GO Process	GO:0006284	Base-excision repair	5	39	6.15863	bottom	0.0011	afc	STRG0A56FBJ.g11146.t1,STRG0A56FBJ.g13564.t1,STRG0A56FBJ.g3823.t1,STRG0A56FBJ.g4896.t1,STRG0A56FBJ.g6159.t1	g11146.t1,g13564.t1,g3823.t1,g4896.t1,g6159.t1	g11146.t1,g13564.t1,g3823.t1,g4896.t1,g6159.t1	2.8846113,1.623357739,2.905608074,1.480526783,1.583158939
GO Process	GO:0007155	Cell adhesion	40	423	1.54437	top	0.0012	ks	STRG0A56FBJ.g10619.t1,STRG0A56FBJ.g10781.t1,STRG0A56FBJ.g11531.t1,STRG0A56FBJ.g11532.t1,STRG0A56FBJ.g12317.t1,STRG0A56FBJ.g12587.t1,STRG0A56FBJ.g12789.t1,STRG0A56FBJ.g12926.t1,STRG0A56FBJ.g13233.t1,STRG0A56FBJ.g13694.t1,STRG0A56FBJ.g14188.t1,STRG0A56FBJ.g14943.t1,STRG0A56FBJ.g15407.t1,STRG0A56FBJ.g16366.t1,STRG0A56FBJ.g1859.t1,STRG0A56FBJ.g2157.t1,STRG0A56FBJ.g2506.t1,STRG0A56FBJ.g2507.t1,STRG0A5…	g10619.t1,g10781.t1,g11531.t1,g11532.t1,g12317.t1,g12587.t1,g12789.t1,g12926.t1,g13233.t1,g13694.t1,g14188.t1,g14943.t1,g15407.t1,g16366.t1,g1859.t1,g2157.t1,g2506.t1,g2507.t1,g2510.t1,g270.t1,g2723.t1,g2853.t1,g2884.t1,g3072.t1,g3466.t1,g4049.t1,g4197.t1,g4219.t1,g4220.t1,g5773.t2,g6006.t1,g6013.t1,g6549.t1,g6585.t1,g6701.t1,g7362.t1,g7413.t1,g8241.t1,g9705.t1,g9850.t1	g10619.t1,g10781.t1,g11531.t1,g11532.t1,g12317.t1,g12587.t1,g12789.t1,g12926.t1,g13233.t1,g13694.t1,g14188.t1,g14943.t1,g15407.t1,g16366.t1,g1859.t1,g2157.t1,g2506.t1,g2507.t1,g2510.t1,g270.t1,g2723.t1,g2853.t1,g2884.t1,g3072.t1,g3466.t1,g4049.t1,g4197.t1,g4219.t1,g4220.t1,g5773.t2,g6006.t1,g6013.t1,g6549.t1,g6585.t1,g6701.t1,g7362.t1,g7413.t1,g8241.t1,g9705.t1,g9850.t1	-0.783492151,2.067705148,-0.957180335,-1.839639071,-1.681764555,-1.043412253,-0.685019363,-2.207566853,-0.589624411,-1.291342296,-0.924234766,-2.153858476,-1.304371226,-1.187771881,-2.120709217,-1.339020965,-1.022070478,-1.602435857,-1.644015295,-1.036291692,-0.791906957,-0.63040699,-1.425834713,0.673613842,-1.610684843,-1.902540373,-0.89820489,-0.579111577,-2.433174927,-0.705022737,-0.466544214,…
GO Process	GO:0007286	Spermatid development	21	74	2.44624	top	0.0012	ks	STRG0A56FBJ.g10758.t1,STRG0A56FBJ.g10924.t1,STRG0A56FBJ.g11427.t1,STRG0A56FBJ.g11863.t1,STRG0A56FBJ.g11926.t1,STRG0A56FBJ.g14096.t1,STRG0A56FBJ.g14418.t1,STRG0A56FBJ.g14903.t1,STRG0A56FBJ.g15901.t1,STRG0A56FBJ.g16005.t1,STRG0A56FBJ.g1987.t1,STRG0A56FBJ.g2962.t1,STRG0A56FBJ.g3280.t1,STRG0A56FBJ.g3615.t1,STRG0A56FBJ.g4721.t1,STRG0A56FBJ.g4791.t1,STRG0A56FBJ.g5208.t1,STRG0A56FBJ.g5374.t1,STRG0A56FBJ…	g10758.t1,g10924.t1,g11427.t1,g11863.t1,g11926.t1,g14096.t1,g14418.t1,g14903.t1,g15901.t1,g16005.t1,g1987.t1,g2962.t1,g3280.t1,g3615.t1,g4721.t1,g4791.t1,g5208.t1,g5374.t1,g5538.t1,g6188.t1,g7532.t1	g10758.t1,g10924.t1,g11427.t1,g11863.t1,g11926.t1,g14096.t1,g14418.t1,g14903.t1,g15901.t1,g16005.t1,g1987.t1,g2962.t1,g3280.t1,g3615.t1,g4721.t1,g4791.t1,g5208.t1,g5374.t1,g5538.t1,g6188.t1,g7532.t1	-1.275611172,-1.822056587,-1.548932509,-1.868574883,1.048116873,-0.934510256,-1.9227885,-0.729194633,-1.132956181,-0.945953705,-1.463184988,-2.147871691,-2.240452787,-2.185771866,-1.469284384,-0.967146033,-1.443501782,-1.434516948,-1.753789775,-1.628302558,-1.099599309
GO Process	GO:0000956	Nuclear-transcribed mRNA catabolic process	18	79	3.7035	bottom	0.0013	afc	STRG0A56FBJ.g12779.t1,STRG0A56FBJ.g13806.t1,STRG0A56FBJ.g13929.t1,STRG0A56FBJ.g14118.t1,STRG0A56FBJ.g14125.t1,STRG0A56FBJ.g14471.t1,STRG0A56FBJ.g15033.t1,STRG0A56FBJ.g16382.t1,STRG0A56FBJ.g16664.t1,STRG0A56FBJ.g16882.t1,STRG0A56FBJ.g3026.t1,STRG0A56FBJ.g5753.t1,STRG0A56FBJ.g5775.t1,STRG0A56FBJ.g7601.t1,STRG0A56FBJ.g7993.t1,STRG0A56FBJ.g8501.t1,STRG0A56FBJ.g8833.t1,STRG0A56FBJ.g9954.t1	g12779.t1,g13806.t1,g13929.t1,g14118.t1,g14125.t1,g14471.t1,g15033.t1,g16382.t1,g16664.t1,g16882.t1,g3026.t1,g5753.t1,g5775.t1,g7601.t1,g7993.t1,g8501.t1,g8833.t1,g9954.t1	g12779.t1,g13806.t1,g13929.t1,g14118.t1,g14125.t1,g14471.t1,g15033.t1,g16382.t1,g16664.t1,g16882.t1,g3026.t1,g5753.t1,g5775.t1,g7601.t1,g7993.t1,g8501.t1,g8833.t1,g9954.t1	1.60224546,0.741590607,1.370464581,1.072258989,3.057315031,1.150842856,1.162423469,1.959919797,-2.180683348,0.899961293,0.95385127,2.174315398,0.922409522,1.246038332,1.864979394,1.50886069,0.73948922,1.428258634
GO Process	GO:0006310	DNA recombination	22	138	4.3845	bottom	0.0013	ks	STRG0A56FBJ.g10956.t1,STRG0A56FBJ.g11149.t1,STRG0A56FBJ.g12939.t1,STRG0A56FBJ.g13564.t1,STRG0A56FBJ.g13567.t1,STRG0A56FBJ.g15498.t1,STRG0A56FBJ.g16515.t1,STRG0A56FBJ.g16703.t1,STRG0A56FBJ.g1838.t1,STRG0A56FBJ.g2520.t1,STRG0A56FBJ.g2535.t1,STRG0A56FBJ.g3781.t1,STRG0A56FBJ.g3823.t1,STRG0A56FBJ.g4896.t1,STRG0A56FBJ.g5003.t1,STRG0A56FBJ.g5013.t1,STRG0A56FBJ.g599.t1,STRG0A56FBJ.g6159.t1,STRG0A56FBJ.g6…	g10956.t1,g11149.t1,g12939.t1,g13564.t1,g13567.t1,g15498.t1,g16515.t1,g16703.t1,g1838.t1,g2520.t1,g2535.t1,g3781.t1,g3823.t1,g4896.t1,g5003.t1,g5013.t1,g599.t1,g6159.t1,g6652.t1,g6848.t1,g7006.t1,g8245.t1	g10956.t1,g11149.t1,g12939.t1,g13564.t1,g13567.t1,g15498.t1,g16515.t1,g16703.t1,g1838.t1,g2520.t1,g2535.t1,g3781.t1,g3823.t1,g4896.t1,g5003.t1,g5013.t1,g599.t1,g6159.t1,g6652.t1,g6848.t1,g7006.t1,g8245.t1	1.294215006,-2.516745613,1.946426853,1.623357739,-2.400641123,2.583958876,3.198996552,1.854164198,0.809721044,0.996657562,3.100627509,0.87878332,2.905608074,1.480526783,2.572178959,1.809277871,0.740816954,1.583158939,1.07669455,1.070715429,2.348747702,2.96905522
GO Process	GO:0043161	Proteasome-mediated ubiquitin-dependent protein catabolic process	26	216	2.49903	bottom	0.0013	ks	STRG0A56FBJ.g12552.t1,STRG0A56FBJ.g12683.t1,STRG0A56FBJ.g12895.t1,STRG0A56FBJ.g13343.t1,STRG0A56FBJ.g14156.t1,STRG0A56FBJ.g14221.t1,STRG0A56FBJ.g14870.t1,STRG0A56FBJ.g1559.t1,STRG0A56FBJ.g15904.t1,STRG0A56FBJ.g2004.t1,STRG0A56FBJ.g2007.t1,STRG0A56FBJ.g2886.t1,STRG0A56FBJ.g4284.t1,STRG0A56FBJ.g4294.t1,STRG0A56FBJ.g4505.t1,STRG0A56FBJ.g5137.t1,STRG0A56FBJ.g5366.t1,STRG0A56FBJ.g5758.t1,STRG0A56FBJ.g…	g12552.t1,g12683.t1,g12895.t1,g13343.t1,g14156.t1,g14221.t1,g14870.t1,g1559.t1,g15904.t1,g2004.t1,g2007.t1,g2886.t1,g4284.t1,g4294.t1,g4505.t1,g5137.t1,g5366.t1,g5758.t1,g5777.t1,g6045.t1,g6746.t1,g6848.t1,g7443.t1,g7452.t1,g7940.t1,g8513.t1	g12552.t1,g12683.t1,g12895.t1,g13343.t1,g14156.t1,g14221.t1,g14870.t1,g1559.t1,g15904.t1,g2004.t1,g2007.t1,g2886.t1,g4284.t1,g4294.t1,g4505.t1,g5137.t1,g5366.t1,g5758.t1,g5777.t1,g6045.t1,g6746.t1,g6848.t1,g7443.t1,g7452.t1,g7940.t1,g8513.t1	0.570731486,0.860301544,1.165233075,1.096775086,0.728040913,1.277003378,-0.619959779,1.203339787,1.078733911,1.023713969,1.070813282,1.564059394,1.150589001,0.747557182,-0.658541943,0.712143131,0.602846021,1.336477968,1.237263135,0.844720151,-1.493989293,1.070715429,0.853437961,0.879061379,0.773269418,0.862322848
GO Process	GO:0008202	Steroid metabolic process	18	120	2.74518	top	0.0014	afc	STRG0A56FBJ.g10703.t1,STRG0A56FBJ.g10975.t1,STRG0A56FBJ.g1114.t1,STRG0A56FBJ.g11633.t1,STRG0A56FBJ.g12333.t1,STRG0A56FBJ.g12334.t1,STRG0A56FBJ.g1479.t1,STRG0A56FBJ.g14902.t1,STRG0A56FBJ.g15562.t1,STRG0A56FBJ.g1706.t1,STRG0A56FBJ.g1994.t1,STRG0A56FBJ.g2111.t1,STRG0A56FBJ.g5518.t1,STRG0A56FBJ.g6033.t1,STRG0A56FBJ.g7154.t1,STRG0A56FBJ.g8384.t1,STRG0A56FBJ.g8767.t1,STRG0A56FBJ.g9088.t1	g10703.t1,g10975.t1,g1114.t1,g11633.t1,g12333.t1,g12334.t1,g1479.t1,g14902.t1,g15562.t1,g1706.t1,g1994.t1,g2111.t1,g5518.t1,g6033.t1,g7154.t1,g8384.t1,g8767.t1,g9088.t1	g10703.t1,g10975.t1,g1114.t1,g11633.t1,g12333.t1,g12334.t1,g1479.t1,g14902.t1,g15562.t1,g1706.t1,g1994.t1,g2111.t1,g5518.t1,g6033.t1,g7154.t1,g8384.t1,g8767.t1,g9088.t1	-1.622559879,-0.755805256,-0.814607868,-1.647450966,-1.392196703,-2.238113402,-2.520916647,-1.444125956,-0.673759346,-1.086095874,-3.347058903,-1.024707524,0.896691268,-3.48732745,-1.573567319,-2.248828226,-1.975428129,-0.604499237
GO Process	GO:0032212	Positive regulation of telomere maintenance via telomerase	6	15	5.73156	bottom	0.0014	afc	STRG0A56FBJ.g14265.t1,STRG0A56FBJ.g14847.t1,STRG0A56FBJ.g16510.t1,STRG0A56FBJ.g16625.t1,STRG0A56FBJ.g1838.t1,STRG0A56FBJ.g5301.t1	g14265.t1,g14847.t1,g16510.t1,g16625.t1,g1838.t1,g5301.t1	g14265.t1,g14847.t1,g16510.t1,g16625.t1,g1838.t1,g5301.t1	2.109140945,2.079494856,2.262894324,2.107518908,0.809721044,2.271744918
GO Process	GO:0001732	Formation of cytoplasmic translation initiation complex	13	18	4.16849	bottom	0.0016	afc	STRG0A56FBJ.g1065.t1,STRG0A56FBJ.g11765.t1,STRG0A56FBJ.g14342.t1,STRG0A56FBJ.g16236.t1,STRG0A56FBJ.g16407.t1,STRG0A56FBJ.g16501.t1,STRG0A56FBJ.g16921.t1,STRG0A56FBJ.g16953.t1,STRG0A56FBJ.g2023.t1,STRG0A56FBJ.g2542.t1,STRG0A56FBJ.g2844.t1,STRG0A56FBJ.g5249.t1,STRG0A56FBJ.g8379.t1	g1065.t1,g11765.t1,g14342.t1,g16236.t1,g16407.t1,g16501.t1,g16921.t1,g16953.t1,g2023.t1,g2542.t1,g2844.t1,g5249.t1,g8379.t1	g1065.t1,g11765.t1,g14342.t1,g16236.t1,g16407.t1,g16501.t1,g16921.t1,g16953.t1,g2023.t1,g2542.t1,g2844.t1,g5249.t1,g8379.t1	1.892385441,1.127115123,1.398157082,1.34917892,1.823552318,1.03137856,1.124474133,1.378645564,1.334102159,0.947145543,1.603193747,1.195311406,1.644331734
GO Process	GO:0006635	Fatty acid beta-oxidation	25	69	2.58635	top	0.0016	ks	STRG0A56FBJ.g10290.t1,STRG0A56FBJ.g10703.t1,STRG0A56FBJ.g11538.t1,STRG0A56FBJ.g12333.t1,STRG0A56FBJ.g12334.t1,STRG0A56FBJ.g12948.t1,STRG0A56FBJ.g14050.t1,STRG0A56FBJ.g14406.t1,STRG0A56FBJ.g15467.t1,STRG0A56FBJ.g15687.t1,STRG0A56FBJ.g15689.t1,STRG0A56FBJ.g16440.t1,STRG0A56FBJ.g16441.t1,STRG0A56FBJ.g16461.t1,STRG0A56FBJ.g2342.t1,STRG0A56FBJ.g3828.t1,STRG0A56FBJ.g5518.t1,STRG0A56FBJ.g6549.t1,STRG0A5…	g10290.t1,g10703.t1,g11538.t1,g12333.t1,g12334.t1,g12948.t1,g14050.t1,g14406.t1,g15467.t1,g15687.t1,g15689.t1,g16440.t1,g16441.t1,g16461.t1,g2342.t1,g3828.t1,g5518.t1,g6549.t1,g6737.t1,g749.t1,g7948.t1,g8541.t1,g8542.t1,g8741.t1,g9255.t1	g10290.t1,g10703.t1,g11538.t1,g12333.t1,g12334.t1,g12948.t1,g14050.t1,g14406.t1,g15467.t1,g15687.t1,g15689.t1,g16440.t1,g16441.t1,g16461.t1,g2342.t1,g3828.t1,g5518.t1,g6549.t1,g6737.t1,g749.t1,g7948.t1,g8541.t1,g8542.t1,g8741.t1,g9255.t1	-0.769387904,-1.622559879,-1.305824839,-1.392196703,-2.238113402,-1.69738072,-0.603196985,-2.519233849,-0.488832176,-2.166546217,-1.268511085,-2.253090461,-1.936063544,-2.445508714,-0.718571217,-1.39731617,0.896691268,-1.074903502,-1.82825595,-2.236267397,-0.890731245,-1.794909836,-1.658871611,-2.160386515,-0.69224213
GO Process	GO:0048468	Cell development	76	680	0.887587	top	0.0016	ks	STRG0A56FBJ.g10703.t1,STRG0A56FBJ.g10731.t1,STRG0A56FBJ.g10758.t1,STRG0A56FBJ.g10924.t1,STRG0A56FBJ.g11427.t1,STRG0A56FBJ.g11450.t1,STRG0A56FBJ.g11667.t1,STRG0A56FBJ.g11687.t1,STRG0A56FBJ.g11863.t1,STRG0A56FBJ.g11926.t1,STRG0A56FBJ.g12317.t1,STRG0A56FBJ.g12475.t1,STRG0A56FBJ.g12792.t1,STRG0A56FBJ.g12832.t1,STRG0A56FBJ.g12917.t1,STRG0A56FBJ.g12988.t1,STRG0A56FBJ.g13046.t1,STRG0A56FBJ.g13233.t1,STR…	g10703.t1,g10731.t1,g10758.t1,g10924.t1,g11427.t1,g11450.t1,g11667.t1,g11687.t1,g11863.t1,g11926.t1,g12317.t1,g12475.t1,g12792.t1,g12832.t1,g12917.t1,g12988.t1,g13046.t1,g13233.t1,g14096.t1,g14123.t1,g14365.t1,g14418.t1,g14423.t1,g1475.t1,g14903.t1,g15777.t1,g15778.t1,g15901.t1,g16005.t1,g16095.t1,g16095.t3,g16341.t1,g16388.t1,g1655.t1,g1987.t1,g2111.t1,g2157.t1,g2520.t1,g2553.t1,g2853.t1,g2923.t…	g10703.t1,g10731.t1,g10758.t1,g10924.t1,g11427.t1,g11450.t1,g11667.t1,g11687.t1,g11863.t1,g11926.t1,g12317.t1,g12475.t1,g12792.t1,g12832.t1,g12917.t1,g12988.t1,g13046.t1,g13233.t1,g14096.t1,g14123.t1,g14365.t1,g14418.t1,g14423.t1,g1475.t1,g14903.t1,g15777.t1,g15778.t1,g15901.t1,g16005.t1,g16095.t1,g16095.t3,g16341.t1,g16388.t1,g1655.t1,g1987.t1,g2111.t1,g2157.t1,g2520.t1,g2553.t1,g2853.t1,g2923.t…	-1.622559879,-1.220928341,-1.275611172,-1.822056587,-1.548932509,1.250435787,-0.789696722,-0.870260402,-1.868574883,1.048116873,-1.681764555,0.718685466,-1.140978863,-1.585653154,1.126151849,-1.452823291,-1.012870911,-0.589624411,-0.934510256,1.488579723,0.592831433,-1.9227885,-1.211608658,-0.735042407,-0.729194633,-0.499906811,-0.570766721,-1.132956181,-0.945953705,-1.393923504,-0.65657216,-0.70…
GO Process	GO:0031167	rRNA methylation	4	29	6.50386	bottom	0.0019	afc	STRG0A56FBJ.g13042.t1,STRG0A56FBJ.g13272.t1,STRG0A56FBJ.g13403.t1,STRG0A56FBJ.g2843.t1	g13042.t1,g13272.t1,g13403.t1,g2843.t1	g13042.t1,g13272.t1,g13403.t1,g2843.t1	2.741363783,1.420638048,2.214116895,2.508444172
GO Process	GO:0003006	Developmental process involved in reproduction	58	386	1.61787	top	0.0023	ks	STRG0A56FBJ.g10263.t1,STRG0A56FBJ.g10364.t1,STRG0A56FBJ.g10703.t1,STRG0A56FBJ.g10758.t1,STRG0A56FBJ.g10924.t1,STRG0A56FBJ.g11427.t1,STRG0A56FBJ.g11838.t1,STRG0A56FBJ.g11863.t1,STRG0A56FBJ.g11926.t1,STRG0A56FBJ.g12989.t1,STRG0A56FBJ.g13247.t1,STRG0A56FBJ.g13305.t1,STRG0A56FBJ.g13305.t2,STRG0A56FBJ.g13305.t5,STRG0A56FBJ.g13728.t1,STRG0A56FBJ.g13780.t1,STRG0A56FBJ.g14096.t1,STRG0A56FBJ.g14283.t1,STR…	g10263.t1,g10364.t1,g10703.t1,g10758.t1,g10924.t1,g11427.t1,g11838.t1,g11863.t1,g11926.t1,g12989.t1,g13247.t1,g13305.t1,g13305.t2,g13305.t5,g13728.t1,g13780.t1,g14096.t1,g14283.t1,g14418.t1,g1475.t1,g14903.t1,g15191.t1,g15901.t1,g16005.t1,g16031.t1,g16037.t1,g1639.t1,g16575.t1,g16646.t1,g1936.t1,g1987.t1,g2328.t1,g2520.t1,g2735.t1,g2962.t1,g3280.t1,g3615.t1,g3913.t1,g4609.t1,g4721.t1,g4791.t1,g52…	g10263.t1,g10364.t1,g10703.t1,g10758.t1,g10924.t1,g11427.t1,g11838.t1,g11863.t1,g11926.t1,g12989.t1,g13247.t1,g13305.t1,g13305.t2,g13305.t5,g13728.t1,g13780.t1,g14096.t1,g14283.t1,g14418.t1,g1475.t1,g14903.t1,g15191.t1,g15901.t1,g16005.t1,g16031.t1,g16037.t1,g1639.t1,g16575.t1,g16646.t1,g1936.t1,g1987.t1,g2328.t1,g2520.t1,g2735.t1,g2962.t1,g3280.t1,g3615.t1,g3913.t1,g4609.t1,g4721.t1,g4791.t1,g52…	1.270511721,-1.022479236,-1.622559879,-1.275611172,-1.822056587,-1.548932509,0.904655247,-1.868574883,1.048116873,-1.963218802,-0.962807666,-3.522685347,-3.603433648,-2.954786037,-1.379090193,-1.772271559,-0.934510256,-0.733600441,-1.9227885,-0.735042407,-0.729194633,-1.805382194,-1.132956181,-0.945953705,-1.860591086,0.617361382,1.986155183,-0.803956579,0.718126556,-1.798760085,-1.463184988,0.77…
GO Process	GO:0006812	Cation transport	29	654	2.2396	top	0.0023	ks	STRG0A56FBJ.g11860.t1,STRG0A56FBJ.g11909.t1,STRG0A56FBJ.g12686.t1,STRG0A56FBJ.g12776.t1,STRG0A56FBJ.g14231.t1,STRG0A56FBJ.g14677.t1,STRG0A56FBJ.g15487.t1,STRG0A56FBJ.g15887.t1,STRG0A56FBJ.g16329.t1,STRG0A56FBJ.g1742.t1,STRG0A56FBJ.g2322.t1,STRG0A56FBJ.g2416.t1,STRG0A56FBJ.g2573.t1,STRG0A56FBJ.g2682.t1,STRG0A56FBJ.g3308.t1,STRG0A56FBJ.g4106.t1,STRG0A56FBJ.g4417.t1,STRG0A56FBJ.g4878.t1,STRG0A56FBJ.…	g11860.t1,g11909.t1,g12686.t1,g12776.t1,g14231.t1,g14677.t1,g15487.t1,g15887.t1,g16329.t1,g1742.t1,g2322.t1,g2416.t1,g2573.t1,g2682.t1,g3308.t1,g4106.t1,g4417.t1,g4878.t1,g5512.t1,g6061.t1,g6908.t1,g6981.t1,g7313.t1,g7599.t1,g7642.t1,g7928.t1,g8317.t1,g8489.t1,g9214.t1	g11860.t1,g11909.t1,g12686.t1,g12776.t1,g14231.t1,g14677.t1,g15487.t1,g15887.t1,g16329.t1,g1742.t1,g2322.t1,g2416.t1,g2573.t1,g2682.t1,g3308.t1,g4106.t1,g4417.t1,g4878.t1,g5512.t1,g6061.t1,g6908.t1,g6981.t1,g7313.t1,g7599.t1,g7642.t1,g7928.t1,g8317.t1,g8489.t1,g9214.t1	-1.582309072,-3.137446324,-1.487429083,-0.776943094,-1.675223671,-1.55881541,-2.744545311,-1.234696136,-1.50761623,-1.637874353,-0.713477866,-0.947345955,-2.429767338,-1.187949239,-1.356553933,-1.182175472,1.116722362,-1.965130213,0.892682915,1.029515151,-1.067430675,-3.170356601,-2.603965705,-1.572527261,-0.921536779,-0.639183153,-1.055147684,-0.835400115,-1.014478367
GO Process	GO:0048609	Multicellular organismal reproductive process	52	328	1.84292	top	0.0026	ks	STRG0A56FBJ.g10263.t1,STRG0A56FBJ.g10758.t1,STRG0A56FBJ.g10924.t1,STRG0A56FBJ.g11148.t1,STRG0A56FBJ.g11427.t1,STRG0A56FBJ.g11838.t1,STRG0A56FBJ.g11863.t1,STRG0A56FBJ.g11926.t1,STRG0A56FBJ.g12989.t1,STRG0A56FBJ.g13247.t1,STRG0A56FBJ.g13305.t1,STRG0A56FBJ.g13305.t2,STRG0A56FBJ.g13305.t5,STRG0A56FBJ.g13728.t1,STRG0A56FBJ.g13780.t1,STRG0A56FBJ.g14096.t1,STRG0A56FBJ.g14407.t1,STRG0A56FBJ.g14418.t1,STR…	g10263.t1,g10758.t1,g10924.t1,g11148.t1,g11427.t1,g11838.t1,g11863.t1,g11926.t1,g12989.t1,g13247.t1,g13305.t1,g13305.t2,g13305.t5,g13728.t1,g13780.t1,g14096.t1,g14407.t1,g14418.t1,g1475.t1,g14903.t1,g15062.t1,g15191.t1,g15901.t1,g16005.t1,g16031.t1,g16037.t1,g1639.t1,g16575.t1,g16646.t1,g1936.t1,g1987.t1,g2111.t1,g2328.t1,g2520.t1,g2962.t1,g3280.t1,g3615.t1,g3913.t1,g4609.t1,g4721.t1,g4791.t1,g52…	g10263.t1,g10758.t1,g10924.t1,g11148.t1,g11427.t1,g11838.t1,g11863.t1,g11926.t1,g12989.t1,g13247.t1,g13305.t1,g13305.t2,g13305.t5,g13728.t1,g13780.t1,g14096.t1,g14407.t1,g14418.t1,g1475.t1,g14903.t1,g15062.t1,g15191.t1,g15901.t1,g16005.t1,g16031.t1,g16037.t1,g1639.t1,g16575.t1,g16646.t1,g1936.t1,g1987.t1,g2111.t1,g2328.t1,g2520.t1,g2962.t1,g3280.t1,g3615.t1,g3913.t1,g4609.t1,g4721.t1,g4791.t1,g52…	1.270511721,-1.275611172,-1.822056587,1.284905058,-1.548932509,0.904655247,-1.868574883,1.048116873,-1.963218802,-0.962807666,-3.522685347,-3.603433648,-2.954786037,-1.379090193,-1.772271559,-0.934510256,-4.29407144,-1.9227885,-0.735042407,-0.729194633,1.201352438,-1.805382194,-1.132956181,-0.945953705,-1.860591086,0.617361382,1.986155183,-0.803956579,0.718126556,-1.798760085,-1.463184988,-1.0247…
GO Process	GO:0007015	Actin filament organization	30	171	1.35233	top	0.003	ks	STRG0A56FBJ.g10320.t1,STRG0A56FBJ.g10731.t1,STRG0A56FBJ.g11151.t1,STRG0A56FBJ.g11675.t1,STRG0A56FBJ.g11687.t1,STRG0A56FBJ.g12792.t1,STRG0A56FBJ.g13319.t1,STRG0A56FBJ.g13390.t1,STRG0A56FBJ.g15258.t1,STRG0A56FBJ.g15776.t1,STRG0A56FBJ.g17017.t1,STRG0A56FBJ.g1786.t1,STRG0A56FBJ.g2947.t1,STRG0A56FBJ.g3399.t1,STRG0A56FBJ.g3508.t1,STRG0A56FBJ.g4454.t1,STRG0A56FBJ.g448.t1,STRG0A56FBJ.g5028.t1,STRG0A56FBJ…	g10320.t1,g10731.t1,g11151.t1,g11675.t1,g11687.t1,g12792.t1,g13319.t1,g13390.t1,g15258.t1,g15776.t1,g17017.t1,g1786.t1,g2947.t1,g3399.t1,g3508.t1,g4454.t1,g448.t1,g5028.t1,g5212.t1,g5366.t1,g5730.t1,g5733.t1,g5863.t1,g6486.t1,g6547.t1,g6665.t1,g6799.t1,g685.t1,g7151.t1,g7581.t1	g10320.t1,g10731.t1,g11151.t1,g11675.t1,g11687.t1,g12792.t1,g13319.t1,g13390.t1,g15258.t1,g15776.t1,g17017.t1,g1786.t1,g2947.t1,g3399.t1,g3508.t1,g4454.t1,g448.t1,g5028.t1,g5212.t1,g5366.t1,g5730.t1,g5733.t1,g5863.t1,g6486.t1,g6547.t1,g6665.t1,g6799.t1,g685.t1,g7151.t1,g7581.t1	-1.70176532,-1.220928341,0.667149877,-0.941109181,-0.870260402,-1.140978863,-1.071236335,-0.56891928,-0.977000462,-1.472710602,-1.171609195,-0.735907999,-0.692727042,-1.075779746,-1.645874695,-0.709428932,-1.9879967,1.348947025,-1.071311932,0.602846021,-0.837915173,-0.994816345,-0.928187771,-0.487616292,-0.878619448,-1.689571934,-1.169926409,-1.490193703,0.727044354,-0.579324972
GO Process	GO:0005975	Carbohydrate metabolic process	68	423	1.41639	top	0.0031	ks	STRG0A56FBJ.g1066.t1,STRG0A56FBJ.g10761.t1,STRG0A56FBJ.g109.t1,STRG0A56FBJ.g11406.t1,STRG0A56FBJ.g11511.t1,STRG0A56FBJ.g1260.t1,STRG0A56FBJ.g12654.t1,STRG0A56FBJ.g13018.t1,STRG0A56FBJ.g13056.t1,STRG0A56FBJ.g13168.t1,STRG0A56FBJ.g13913.t1,STRG0A56FBJ.g14178.t1,STRG0A56FBJ.g14365.t1,STRG0A56FBJ.g14665.t1,STRG0A56FBJ.g14958.t1,STRG0A56FBJ.g1500.t1,STRG0A56FBJ.g15325.t1,STRG0A56FBJ.g15423.t1,STRG0A56…	g1066.t1,g10761.t1,g109.t1,g11406.t1,g11511.t1,g1260.t1,g12654.t1,g13018.t1,g13056.t1,g13168.t1,g13913.t1,g14178.t1,g14365.t1,g14665.t1,g14958.t1,g1500.t1,g15325.t1,g15423.t1,g15425.t1,g15426.t1,g15492.t1,g15623.t1,g15870.t1,g16095.t1,g16095.t3,g1624.t1,g16471.t1,g16472.t1,g16513.t1,g16749.t1,g1817.t1,g1946.t1,g2248.t1,g2565.t1,g2579.t1,g2754.t1,g2838.t1,g3857.t1,g3881.t1,g4146.t1,g4188.t1,g4201.…	g1066.t1,g10761.t1,g109.t1,g11406.t1,g11511.t1,g1260.t1,g12654.t1,g13018.t1,g13056.t1,g13168.t1,g13913.t1,g14178.t1,g14365.t1,g14665.t1,g14958.t1,g1500.t1,g15325.t1,g15423.t1,g15425.t1,g15426.t1,g15492.t1,g15623.t1,g15870.t1,g16095.t1,g16095.t3,g1624.t1,g16471.t1,g16472.t1,g16513.t1,g16749.t1,g1817.t1,g1946.t1,g2248.t1,g2565.t1,g2579.t1,g2754.t1,g2838.t1,g3857.t1,g3881.t1,g4146.t1,g4188.t1,g4201.…	1.369992388,-1.820266793,0.979392542,-1.30077953,0.840257483,0.687263092,1.468358303,-2.233983689,0.896757834,-1.167712946,-0.636803646,-2.989420966,0.592831433,-1.576887803,-0.68950469,1.106959711,-0.617674313,-1.633096863,-1.903542993,-1.568261966,-1.797837805,-1.638837087,-1.818547769,-1.393923504,-0.65657216,-1.237093936,-4.892553349,-3.923325798,0.794224512,-0.745289586,-1.622564261,-0.53020…
GO Process	GO:0006026	Aminoglycan catabolic process	5	31	4.83762	top	0.0032	afc	STRG0A56FBJ.g16471.t1,STRG0A56FBJ.g16472.t1,STRG0A56FBJ.g2838.t1,STRG0A56FBJ.g6213.t1,STRG0A56FBJ.g8030.t1	g16471.t1,g16472.t1,g2838.t1,g6213.t1,g8030.t1	g16471.t1,g16472.t1,g2838.t1,g6213.t1,g8030.t1	-4.892553349,-3.923325798,-1.859661503,-1.180288299,-1.097743165
GO Process	GO:0065004	protein-DNA complex assembly	13	71	3.99497	bottom	0.0033	afc	STRG0A56FBJ.g13279.t1,STRG0A56FBJ.g13480.t1,STRG0A56FBJ.g13973.t1,STRG0A56FBJ.g14053.t1,STRG0A56FBJ.g2291.t1,STRG0A56FBJ.g3271.t1,STRG0A56FBJ.g5774.t1,STRG0A56FBJ.g5995.t1,STRG0A56FBJ.g6221.t1,STRG0A56FBJ.g7531.t1,STRG0A56FBJ.g8245.t1,STRG0A56FBJ.g8924.t1,STRG0A56FBJ.g992.t1	g13279.t1,g13480.t1,g13973.t1,g14053.t1,g2291.t1,g3271.t1,g5774.t1,g5995.t1,g6221.t1,g7531.t1,g8245.t1,g8924.t1,g992.t1	g13279.t1,g13480.t1,g13973.t1,g14053.t1,g2291.t1,g3271.t1,g5774.t1,g5995.t1,g6221.t1,g7531.t1,g8245.t1,g8924.t1,g992.t1	2.9608896,1.083975433,0.89763724,1.403403191,1.180377591,2.204611404,-3.59167108,0.728730283,2.150819301,1.998676726,2.96905522,1.051253324,1.991254838
GO Process	GO:0006479	Protein methylation	17	97	3.642	bottom	0.0035	afc	STRG0A56FBJ.g11122.t1,STRG0A56FBJ.g11369.t1,STRG0A56FBJ.g12513.t1,STRG0A56FBJ.g12928.t1,STRG0A56FBJ.g13042.t1,STRG0A56FBJ.g13929.t1,STRG0A56FBJ.g15691.t1,STRG0A56FBJ.g16812.t1,STRG0A56FBJ.g1775.t1,STRG0A56FBJ.g2775.t1,STRG0A56FBJ.g2843.t1,STRG0A56FBJ.g4185.t1,STRG0A56FBJ.g5791.t1,STRG0A56FBJ.g6345.t1,STRG0A56FBJ.g7330.t1,STRG0A56FBJ.g7631.t1,STRG0A56FBJ.g8391.t1	g11122.t1,g11369.t1,g12513.t1,g12928.t1,g13042.t1,g13929.t1,g15691.t1,g16812.t1,g1775.t1,g2775.t1,g2843.t1,g4185.t1,g5791.t1,g6345.t1,g7330.t1,g7631.t1,g8391.t1	g11122.t1,g11369.t1,g12513.t1,g12928.t1,g13042.t1,g13929.t1,g15691.t1,g16812.t1,g1775.t1,g2775.t1,g2843.t1,g4185.t1,g5791.t1,g6345.t1,g7330.t1,g7631.t1,g8391.t1	-1.277151728,1.07180322,0.728606639,1.400562672,2.741363783,1.370464581,1.148016534,1.084108836,-1.652727769,2.311159974,2.508444172,1.473090771,2.035567487,1.195691954,1.42931143,1.693972121,0.827877741
GO Process	GO:0008015	Blood circulation	12	76	3.19526	top	0.0035	afc	STRG0A56FBJ.g10921.t1,STRG0A56FBJ.g10922.t1,STRG0A56FBJ.g13188.t1,STRG0A56FBJ.g14017.t1,STRG0A56FBJ.g15082.t1,STRG0A56FBJ.g2628.t1,STRG0A56FBJ.g7460.t1,STRG0A56FBJ.g7463.t1,STRG0A56FBJ.g7464.t1,STRG0A56FBJ.g7926.t1,STRG0A56FBJ.g9203.t1,STRG0A56FBJ.g9204.t1	g10921.t1,g10922.t1,g13188.t1,g14017.t1,g15082.t1,g2628.t1,g7460.t1,g7463.t1,g7464.t1,g7926.t1,g9203.t1,g9204.t1	g10921.t1,g10922.t1,g13188.t1,g14017.t1,g15082.t1,g2628.t1,g7460.t1,g7463.t1,g7464.t1,g7926.t1,g9203.t1,g9204.t1	-2.279717712,-2.260036243,-1.142462417,-1.154508988,-0.883712077,-1.623014387,-1.158221176,-1.173539629,-3.126647034,-2.034138954,-2.099906736,-2.16823055
GO Process	GO:0006401	RNA catabolic process	26	102	3.34592	bottom	0.0036	ks	STRG0A56FBJ.g11146.t1,STRG0A56FBJ.g11450.t1,STRG0A56FBJ.g12779.t1,STRG0A56FBJ.g13806.t1,STRG0A56FBJ.g13929.t1,STRG0A56FBJ.g14118.t1,STRG0A56FBJ.g14125.t1,STRG0A56FBJ.g14471.t1,STRG0A56FBJ.g15033.t1,STRG0A56FBJ.g16382.t1,STRG0A56FBJ.g16664.t1,STRG0A56FBJ.g16882.t1,STRG0A56FBJ.g1804.t1,STRG0A56FBJ.g2144.t1,STRG0A56FBJ.g3026.t1,STRG0A56FBJ.g3839.t1,STRG0A56FBJ.g5753.t1,STRG0A56FBJ.g5775.t1,STRG0A56F…	g11146.t1,g11450.t1,g12779.t1,g13806.t1,g13929.t1,g14118.t1,g14125.t1,g14471.t1,g15033.t1,g16382.t1,g16664.t1,g16882.t1,g1804.t1,g2144.t1,g3026.t1,g3839.t1,g5753.t1,g5775.t1,g7601.t1,g7703.t1,g7993.t1,g8501.t1,g8833.t1,g9015.t1,g9842.t1,g9954.t1	g11146.t1,g11450.t1,g12779.t1,g13806.t1,g13929.t1,g14118.t1,g14125.t1,g14471.t1,g15033.t1,g16382.t1,g16664.t1,g16882.t1,g1804.t1,g2144.t1,g3026.t1,g3839.t1,g5753.t1,g5775.t1,g7601.t1,g7703.t1,g7993.t1,g8501.t1,g8833.t1,g9015.t1,g9842.t1,g9954.t1	2.8846113,1.250435787,1.60224546,0.741590607,1.370464581,1.072258989,3.057315031,1.150842856,1.162423469,1.959919797,-2.180683348,0.899961293,1.17257759,-0.796717903,0.95385127,0.565468887,2.174315398,0.922409522,1.246038332,1.430248271,1.864979394,1.50886069,0.73948922,-1.83298626,1.58545019,1.428258634
GO Process	GO:0034220	Ion transmembrane transport	28	774	2.09954	top	0.0036	ks	STRG0A56FBJ.g10239.t1,STRG0A56FBJ.g11286.t1,STRG0A56FBJ.g11860.t1,STRG0A56FBJ.g11909.t1,STRG0A56FBJ.g12686.t1,STRG0A56FBJ.g12776.t1,STRG0A56FBJ.g13232.t1,STRG0A56FBJ.g14178.t1,STRG0A56FBJ.g14231.t1,STRG0A56FBJ.g14677.t1,STRG0A56FBJ.g15887.t1,STRG0A56FBJ.g16329.t1,STRG0A56FBJ.g16791.t1,STRG0A56FBJ.g1742.t1,STRG0A56FBJ.g2322.t1,STRG0A56FBJ.g2416.t1,STRG0A56FBJ.g2682.t1,STRG0A56FBJ.g3308.t1,STRG0A56…	g10239.t1,g11286.t1,g11860.t1,g11909.t1,g12686.t1,g12776.t1,g13232.t1,g14178.t1,g14231.t1,g14677.t1,g15887.t1,g16329.t1,g16791.t1,g1742.t1,g2322.t1,g2416.t1,g2682.t1,g3308.t1,g4106.t1,g4417.t1,g5512.t1,g6061.t1,g6981.t1,g7313.t1,g7642.t1,g7928.t1,g8317.t1,g9214.t1	g10239.t1,g11286.t1,g11860.t1,g11909.t1,g12686.t1,g12776.t1,g13232.t1,g14178.t1,g14231.t1,g14677.t1,g15887.t1,g16329.t1,g16791.t1,g1742.t1,g2322.t1,g2416.t1,g2682.t1,g3308.t1,g4106.t1,g4417.t1,g5512.t1,g6061.t1,g6981.t1,g7313.t1,g7642.t1,g7928.t1,g8317.t1,g9214.t1	-1.287233032,-0.733803761,-1.582309072,-3.137446324,-1.487429083,-0.776943094,-1.600701384,-2.989420966,-1.675223671,-1.55881541,-1.234696136,-1.50761623,-0.742556223,-1.637874353,-0.713477866,-0.947345955,-1.187949239,-1.356553933,-1.182175472,1.116722362,0.892682915,1.029515151,-3.170356601,-2.603965705,-0.921536779,-0.639183153,-1.055147684,-1.014478367
GO Process	GO:0000466	Maturation of 5.8S rRNA from tricistronic rRNA transcript (SSU-rRNA, 5.8S rRNA, LSU-rRNA)	6	23	5.47449	bottom	0.0037	afc	STRG0A56FBJ.g16382.t1,STRG0A56FBJ.g3054.t1,STRG0A56FBJ.g6819.t1,STRG0A56FBJ.g7601.t1,STRG0A56FBJ.g8501.t1,STRG0A56FBJ.g9010.t1	g16382.t1,g3054.t1,g6819.t1,g7601.t1,g8501.t1,g9010.t1	g16382.t1,g3054.t1,g6819.t1,g7601.t1,g8501.t1,g9010.t1	1.959919797,1.291321052,2.884532399,1.246038332,1.50886069,2.190687016
GO Process	GO:0007276	Gamete generation	48	272	1.75746	top	0.0037	ks	STRG0A56FBJ.g10263.t1,STRG0A56FBJ.g10758.t1,STRG0A56FBJ.g10924.t1,STRG0A56FBJ.g11148.t1,STRG0A56FBJ.g11427.t1,STRG0A56FBJ.g11838.t1,STRG0A56FBJ.g11863.t1,STRG0A56FBJ.g11926.t1,STRG0A56FBJ.g12989.t1,STRG0A56FBJ.g13247.t1,STRG0A56FBJ.g13305.t1,STRG0A56FBJ.g13305.t2,STRG0A56FBJ.g13305.t5,STRG0A56FBJ.g13728.t1,STRG0A56FBJ.g14096.t1,STRG0A56FBJ.g14418.t1,STRG0A56FBJ.g1475.t1,STRG0A56FBJ.g14903.t1,STRG…	g10263.t1,g10758.t1,g10924.t1,g11148.t1,g11427.t1,g11838.t1,g11863.t1,g11926.t1,g12989.t1,g13247.t1,g13305.t1,g13305.t2,g13305.t5,g13728.t1,g14096.t1,g14418.t1,g1475.t1,g14903.t1,g15062.t1,g15191.t1,g15901.t1,g16005.t1,g16031.t1,g16037.t1,g1639.t1,g16575.t1,g1936.t1,g1987.t1,g2328.t1,g2520.t1,g2962.t1,g3280.t1,g3615.t1,g3913.t1,g4609.t1,g4721.t1,g4791.t1,g5208.t1,g5374.t1,g5538.t1,g5835.t1,g5990.…	g10263.t1,g10758.t1,g10924.t1,g11148.t1,g11427.t1,g11838.t1,g11863.t1,g11926.t1,g12989.t1,g13247.t1,g13305.t1,g13305.t2,g13305.t5,g13728.t1,g14096.t1,g14418.t1,g1475.t1,g14903.t1,g15062.t1,g15191.t1,g15901.t1,g16005.t1,g16031.t1,g16037.t1,g1639.t1,g16575.t1,g1936.t1,g1987.t1,g2328.t1,g2520.t1,g2962.t1,g3280.t1,g3615.t1,g3913.t1,g4609.t1,g4721.t1,g4791.t1,g5208.t1,g5374.t1,g5538.t1,g5835.t1,g5990.…	1.270511721,-1.275611172,-1.822056587,1.284905058,-1.548932509,0.904655247,-1.868574883,1.048116873,-1.963218802,-0.962807666,-3.522685347,-3.603433648,-2.954786037,-1.379090193,-0.934510256,-1.9227885,-0.735042407,-0.729194633,1.201352438,-1.805382194,-1.132956181,-0.945953705,-1.860591086,0.617361382,1.986155183,-0.803956579,-1.798760085,-1.463184988,0.772284831,0.996657562,-2.147871691,-2.2404…
GO Process	GO:0061013	Regulation of mRNA catabolic process	19	71	3.43046	bottom	0.0037	afc	STRG0A56FBJ.g11285.t1,STRG0A56FBJ.g11953.t1,STRG0A56FBJ.g14118.t1,STRG0A56FBJ.g1441.t1,STRG0A56FBJ.g15033.t1,STRG0A56FBJ.g15227.t1,STRG0A56FBJ.g16382.t1,STRG0A56FBJ.g16664.t1,STRG0A56FBJ.g16882.t1,STRG0A56FBJ.g3152.t1,STRG0A56FBJ.g4896.t1,STRG0A56FBJ.g5088.t1,STRG0A56FBJ.g5130.t1,STRG0A56FBJ.g5775.t1,STRG0A56FBJ.g7283.t1,STRG0A56FBJ.g7601.t1,STRG0A56FBJ.g8189.t1,STRG0A56FBJ.g8501.t1,STRG0A56FBJ.g…	g11285.t1,g11953.t1,g14118.t1,g1441.t1,g15033.t1,g15227.t1,g16382.t1,g16664.t1,g16882.t1,g3152.t1,g4896.t1,g5088.t1,g5130.t1,g5775.t1,g7283.t1,g7601.t1,g8189.t1,g8501.t1,g8833.t1	g11285.t1,g11953.t1,g14118.t1,g1441.t1,g15033.t1,g15227.t1,g16382.t1,g16664.t1,g16882.t1,g3152.t1,g4896.t1,g5088.t1,g5130.t1,g5775.t1,g7283.t1,g7601.t1,g8189.t1,g8501.t1,g8833.t1	0.772037949,1.345128774,1.072258989,1.377012035,1.162423469,1.825505464,1.959919797,-2.180683348,0.899961293,0.893928334,1.480526783,1.659652199,1.177666374,0.922409522,2.44310085,1.246038332,0.687377784,1.50886069,0.73948922
GO Process	GO:0061077	Chaperone-mediated protein folding	17	46	3.58623	bottom	0.0037	afc	STRG0A56FBJ.g10545.t1,STRG0A56FBJ.g10555.t1,STRG0A56FBJ.g12346.t1,STRG0A56FBJ.g12514.t1,STRG0A56FBJ.g14265.t1,STRG0A56FBJ.g14370.t1,STRG0A56FBJ.g14847.t1,STRG0A56FBJ.g16350.t1,STRG0A56FBJ.g16510.t1,STRG0A56FBJ.g16625.t1,STRG0A56FBJ.g4269.t1,STRG0A56FBJ.g4295.t1,STRG0A56FBJ.g5327.t1,STRG0A56FBJ.g5596.t1,STRG0A56FBJ.g694.t1,STRG0A56FBJ.g7924.t1,STRG0A56FBJ.g890.t1	g10545.t1,g10555.t1,g12346.t1,g12514.t1,g14265.t1,g14370.t1,g14847.t1,g16350.t1,g16510.t1,g16625.t1,g4269.t1,g4295.t1,g5327.t1,g5596.t1,g694.t1,g7924.t1,g890.t1	g10545.t1,g10555.t1,g12346.t1,g12514.t1,g14265.t1,g14370.t1,g14847.t1,g16350.t1,g16510.t1,g16625.t1,g4269.t1,g4295.t1,g5327.t1,g5596.t1,g694.t1,g7924.t1,g890.t1	1.723201784,2.525495933,-1.517932058,0.924535494,2.109140945,0.618484044,2.079494856,1.153468368,2.262894324,2.107518908,-1.680451403,0.787329876,2.166404567,1.181251645,1.472130195,0.866895209,0.960272982
GO Process	GO:2000145	Regulation of cell motility	41	326	1.1368	top	0.0037	ks	STRG0A56FBJ.g10334.t1,STRG0A56FBJ.g10781.t1,STRG0A56FBJ.g10846.t1,STRG0A56FBJ.g11066.t1,STRG0A56FBJ.g11687.t1,STRG0A56FBJ.g1221.t1,STRG0A56FBJ.g12475.t1,STRG0A56FBJ.g12552.t1,STRG0A56FBJ.g12792.t1,STRG0A56FBJ.g13233.t1,STRG0A56FBJ.g14017.t1,STRG0A56FBJ.g14268.t1,STRG0A56FBJ.g14417.t1,STRG0A56FBJ.g14418.t1,STRG0A56FBJ.g15547.t1,STRG0A56FBJ.g1608.t1,STRG0A56FBJ.g16437.t1,STRG0A56FBJ.g16456.t1,STRG0…	g10334.t1,g10781.t1,g10846.t1,g11066.t1,g11687.t1,g1221.t1,g12475.t1,g12552.t1,g12792.t1,g13233.t1,g14017.t1,g14268.t1,g14417.t1,g14418.t1,g15547.t1,g1608.t1,g16437.t1,g16456.t1,g1830.t1,g1972.t1,g2157.t1,g2723.t1,g3072.t1,g3095.t1,g3430.t1,g3466.t1,g3474.t1,g3922.t1,g5200.t1,g5422.t1,g5706.t1,g5730.t1,g5733.t1,g5773.t2,g6006.t1,g6013.t1,g6422.t1,g6612.t1,g7063.t1,g7226.t1,g7992.t1	g10334.t1,g10781.t1,g10846.t1,g11066.t1,g11687.t1,g1221.t1,g12475.t1,g12552.t1,g12792.t1,g13233.t1,g14017.t1,g14268.t1,g14417.t1,g14418.t1,g15547.t1,g1608.t1,g16437.t1,g16456.t1,g1830.t1,g1972.t1,g2157.t1,g2723.t1,g3072.t1,g3095.t1,g3430.t1,g3466.t1,g3474.t1,g3922.t1,g5200.t1,g5422.t1,g5706.t1,g5730.t1,g5733.t1,g5773.t2,g6006.t1,g6013.t1,g6422.t1,g6612.t1,g7063.t1,g7226.t1,g7992.t1	0.980851571,2.067705148,-1.738312781,-1.083271327,-0.870260402,-1.73683163,0.718685466,0.570731486,-1.140978863,-0.589624411,-1.154508988,1.171657699,-1.983590108,-1.9227885,-1.287056064,-1.496946627,-1.05838029,-0.536542184,-1.065936626,-1.824851009,-1.339020965,-0.791906957,0.673613842,-1.128292402,-1.15440606,-1.610684843,-1.155871282,-1.139641885,0.700941323,-0.993367025,0.497773973,-0.837915…
GO Process	GO:0046395	Carboxylic acid catabolic process	54	207	1.46352	top	0.0039	ks	STRG0A56FBJ.g10290.t1,STRG0A56FBJ.g10468.t1,STRG0A56FBJ.g10703.t1,STRG0A56FBJ.g10833.t1,STRG0A56FBJ.g11538.t1,STRG0A56FBJ.g12333.t1,STRG0A56FBJ.g12334.t1,STRG0A56FBJ.g12881.t1,STRG0A56FBJ.g12948.t1,STRG0A56FBJ.g13018.t1,STRG0A56FBJ.g13232.t1,STRG0A56FBJ.g13677.t1,STRG0A56FBJ.g13701.t1,STRG0A56FBJ.g14050.t1,STRG0A56FBJ.g14236.t1,STRG0A56FBJ.g14406.t1,STRG0A56FBJ.g15058.t1,STRG0A56FBJ.g15467.t1,STR…	g10290.t1,g10468.t1,g10703.t1,g10833.t1,g11538.t1,g12333.t1,g12334.t1,g12881.t1,g12948.t1,g13018.t1,g13232.t1,g13677.t1,g13701.t1,g14050.t1,g14236.t1,g14406.t1,g15058.t1,g15467.t1,g15687.t1,g15689.t1,g1613.t1,g16440.t1,g16441.t1,g16461.t1,g2134.t1,g2342.t1,g2380.t1,g2444.t1,g2628.t1,g2739.t1,g2786.t1,g3018.t1,g3251.t1,g3828.t1,g432.t1,g4449.t1,g5518.t1,g6165.t1,g6449.t1,g6549.t1,g6737.t1,g6830.t1…	g10290.t1,g10468.t1,g10703.t1,g10833.t1,g11538.t1,g12333.t1,g12334.t1,g12881.t1,g12948.t1,g13018.t1,g13232.t1,g13677.t1,g13701.t1,g14050.t1,g14236.t1,g14406.t1,g15058.t1,g15467.t1,g15687.t1,g15689.t1,g1613.t1,g16440.t1,g16441.t1,g16461.t1,g2134.t1,g2342.t1,g2380.t1,g2444.t1,g2628.t1,g2739.t1,g2786.t1,g3018.t1,g3251.t1,g3828.t1,g432.t1,g4449.t1,g5518.t1,g6165.t1,g6449.t1,g6549.t1,g6737.t1,g6830.t1…	-0.769387904,1.077131847,-1.622559879,-1.2972136,-1.305824839,-1.392196703,-2.238113402,1.009215292,-1.69738072,-2.233983689,-1.600701384,-1.725429596,0.751303856,-0.603196985,-1.718221854,-2.519233849,-0.907349351,-0.488832176,-2.166546217,-1.268511085,-1.680504699,-2.253090461,-1.936063544,-2.445508714,-1.535293121,-0.718571217,-1.529619228,0.852562076,-1.623014387,0.623819931,-1.381043572,0.65…
GO Process	GO:0032204	Regulation of telomere maintenance	11	52	4.18305	bottom	0.0042	afc	STRG0A56FBJ.g14265.t1,STRG0A56FBJ.g14847.t1,STRG0A56FBJ.g15331.t1,STRG0A56FBJ.g16510.t1,STRG0A56FBJ.g16625.t1,STRG0A56FBJ.g16664.t1,STRG0A56FBJ.g16703.t1,STRG0A56FBJ.g16882.t1,STRG0A56FBJ.g1838.t1,STRG0A56FBJ.g2311.t1,STRG0A56FBJ.g5301.t1	g14265.t1,g14847.t1,g15331.t1,g16510.t1,g16625.t1,g16664.t1,g16703.t1,g16882.t1,g1838.t1,g2311.t1,g5301.t1	g14265.t1,g14847.t1,g15331.t1,g16510.t1,g16625.t1,g16664.t1,g16703.t1,g16882.t1,g1838.t1,g2311.t1,g5301.t1	2.109140945,2.079494856,1.352159792,2.262894324,2.107518908,-2.180683348,1.854164198,0.899961293,0.809721044,1.591407605,2.271744918
GO Process	GO:0043488	Regulation of mRNA stability	18	66	3.41936	bottom	0.0042	afc	STRG0A56FBJ.g11285.t1,STRG0A56FBJ.g11953.t1,STRG0A56FBJ.g14118.t1,STRG0A56FBJ.g1441.t1,STRG0A56FBJ.g15033.t1,STRG0A56FBJ.g15227.t1,STRG0A56FBJ.g16382.t1,STRG0A56FBJ.g16664.t1,STRG0A56FBJ.g16882.t1,STRG0A56FBJ.g3152.t1,STRG0A56FBJ.g4896.t1,STRG0A56FBJ.g5088.t1,STRG0A56FBJ.g5775.t1,STRG0A56FBJ.g7283.t1,STRG0A56FBJ.g7601.t1,STRG0A56FBJ.g8189.t1,STRG0A56FBJ.g8501.t1,STRG0A56FBJ.g8833.t1	g11285.t1,g11953.t1,g14118.t1,g1441.t1,g15033.t1,g15227.t1,g16382.t1,g16664.t1,g16882.t1,g3152.t1,g4896.t1,g5088.t1,g5775.t1,g7283.t1,g7601.t1,g8189.t1,g8501.t1,g8833.t1	g11285.t1,g11953.t1,g14118.t1,g1441.t1,g15033.t1,g15227.t1,g16382.t1,g16664.t1,g16882.t1,g3152.t1,g4896.t1,g5088.t1,g5775.t1,g7283.t1,g7601.t1,g8189.t1,g8501.t1,g8833.t1	0.772037949,1.345128774,1.072258989,1.377012035,1.162423469,1.825505464,1.959919797,-2.180683348,0.899961293,0.893928334,1.480526783,1.659652199,0.922409522,2.44310085,1.246038332,0.687377784,1.50886069,0.73948922
GO Process	GO:0018205	Peptidyl-lysine modification	23	176	3.2174	bottom	0.0045	ks	STRG0A56FBJ.g11122.t1,STRG0A56FBJ.g12038.t1,STRG0A56FBJ.g12513.t1,STRG0A56FBJ.g12558.t1,STRG0A56FBJ.g12928.t1,STRG0A56FBJ.g13279.t1,STRG0A56FBJ.g13554.t1,STRG0A56FBJ.g13973.t1,STRG0A56FBJ.g16703.t1,STRG0A56FBJ.g1775.t1,STRG0A56FBJ.g2691.t1,STRG0A56FBJ.g2775.t1,STRG0A56FBJ.g3822.t1,STRG0A56FBJ.g4505.t1,STRG0A56FBJ.g5013.t1,STRG0A56FBJ.g6024.t1,STRG0A56FBJ.g6345.t1,STRG0A56FBJ.g6883.t1,STRG0A56FBJ.…	g11122.t1,g12038.t1,g12513.t1,g12558.t1,g12928.t1,g13279.t1,g13554.t1,g13973.t1,g16703.t1,g1775.t1,g2691.t1,g2775.t1,g3822.t1,g4505.t1,g5013.t1,g6024.t1,g6345.t1,g6883.t1,g7330.t1,g8400.t1,g8844.t1,g8845.t1,g9891.t1	g11122.t1,g12038.t1,g12513.t1,g12558.t1,g12928.t1,g13279.t1,g13554.t1,g13973.t1,g16703.t1,g1775.t1,g2691.t1,g2775.t1,g3822.t1,g4505.t1,g5013.t1,g6024.t1,g6345.t1,g6883.t1,g7330.t1,g8400.t1,g8844.t1,g8845.t1,g9891.t1	-1.277151728,0.907283634,0.728606639,1.340146323,1.400562672,2.9608896,1.322662897,0.89763724,1.854164198,-1.652727769,1.487863113,2.311159974,1.406894601,-0.658541943,1.809277871,1.071841893,1.195691954,0.864045015,1.42931143,0.820412652,0.81702645,1.595657842,1.000935899
GO Process	GO:0046903	Secretion	21	238	1.96635	top	0.0045	ks	STRG0A56FBJ.g11987.t1,STRG0A56FBJ.g12297.t1,STRG0A56FBJ.g1352.t1,STRG0A56FBJ.g15059.t1,STRG0A56FBJ.g15310.t1,STRG0A56FBJ.g15821.t1,STRG0A56FBJ.g15828.t1,STRG0A56FBJ.g2113.t1,STRG0A56FBJ.g2505.t1,STRG0A56FBJ.g3488.t1,STRG0A56FBJ.g4167.t1,STRG0A56FBJ.g5991.t1,STRG0A56FBJ.g603.t1,STRG0A56FBJ.g6960.t1,STRG0A56FBJ.g7040.t1,STRG0A56FBJ.g7188.t1,STRG0A56FBJ.g7407.t1,STRG0A56FBJ.g7487.t1,STRG0A56FBJ.g812…	g11987.t1,g12297.t1,g1352.t1,g15059.t1,g15310.t1,g15821.t1,g15828.t1,g2113.t1,g2505.t1,g3488.t1,g4167.t1,g5991.t1,g603.t1,g6960.t1,g7040.t1,g7188.t1,g7407.t1,g7487.t1,g8129.t1,g8490.t1,g9716.t1	g11987.t1,g12297.t1,g1352.t1,g15059.t1,g15310.t1,g15821.t1,g15828.t1,g2113.t1,g2505.t1,g3488.t1,g4167.t1,g5991.t1,g603.t1,g6960.t1,g7040.t1,g7188.t1,g7407.t1,g7487.t1,g8129.t1,g8490.t1,g9716.t1	-1.357705498,-1.117460899,-1.123544694,-1.498323204,-1.799782587,-1.099318525,-0.605570412,-1.202819241,-2.649483576,-0.924635636,-0.800865873,-1.279885295,-0.928896191,-1.364151163,-0.963675212,-1.724264224,0.892392579,-1.016220623,-1.321953908,-0.840764234,-1.139360462
GO Process	GO:0007338	Single fertilization	7	60	4.98116	bottom	0.0048	afc	STRG0A56FBJ.g12587.t1,STRG0A56FBJ.g1421.t1,STRG0A56FBJ.g14265.t1,STRG0A56FBJ.g14847.t1,STRG0A56FBJ.g16510.t1,STRG0A56FBJ.g16625.t1,STRG0A56FBJ.g2460.t1	g12587.t1,g1421.t1,g14265.t1,g14847.t1,g16510.t1,g16625.t1,g2460.t1	g12587.t1,g1421.t1,g14265.t1,g14847.t1,g16510.t1,g16625.t1,g2460.t1	-1.043412253,1.885854734,2.109140945,2.079494856,2.262894324,2.107518908,2.272310124
GO Process	GO:0030334	Regulation of cell migration	36	308	0.963869	top	0.0052	ks	STRG0A56FBJ.g10781.t1,STRG0A56FBJ.g11066.t1,STRG0A56FBJ.g11687.t1,STRG0A56FBJ.g1221.t1,STRG0A56FBJ.g12475.t1,STRG0A56FBJ.g12552.t1,STRG0A56FBJ.g12792.t1,STRG0A56FBJ.g13233.t1,STRG0A56FBJ.g14017.t1,STRG0A56FBJ.g14268.t1,STRG0A56FBJ.g15547.t1,STRG0A56FBJ.g1608.t1,STRG0A56FBJ.g16437.t1,STRG0A56FBJ.g16456.t1,STRG0A56FBJ.g1830.t1,STRG0A56FBJ.g1972.t1,STRG0A56FBJ.g2157.t1,STRG0A56FBJ.g2723.t1,STRG0A56F…	g10781.t1,g11066.t1,g11687.t1,g1221.t1,g12475.t1,g12552.t1,g12792.t1,g13233.t1,g14017.t1,g14268.t1,g15547.t1,g1608.t1,g16437.t1,g16456.t1,g1830.t1,g1972.t1,g2157.t1,g2723.t1,g3072.t1,g3095.t1,g3430.t1,g3466.t1,g3474.t1,g3922.t1,g5200.t1,g5422.t1,g5706.t1,g5730.t1,g5733.t1,g5773.t2,g6006.t1,g6013.t1,g6422.t1,g6612.t1,g7063.t1,g7992.t1	g10781.t1,g11066.t1,g11687.t1,g1221.t1,g12475.t1,g12552.t1,g12792.t1,g13233.t1,g14017.t1,g14268.t1,g15547.t1,g1608.t1,g16437.t1,g16456.t1,g1830.t1,g1972.t1,g2157.t1,g2723.t1,g3072.t1,g3095.t1,g3430.t1,g3466.t1,g3474.t1,g3922.t1,g5200.t1,g5422.t1,g5706.t1,g5730.t1,g5733.t1,g5773.t2,g6006.t1,g6013.t1,g6422.t1,g6612.t1,g7063.t1,g7992.t1	2.067705148,-1.083271327,-0.870260402,-1.73683163,0.718685466,0.570731486,-1.140978863,-0.589624411,-1.154508988,1.171657699,-1.287056064,-1.496946627,-1.05838029,-0.536542184,-1.065936626,-1.824851009,-1.339020965,-0.791906957,0.673613842,-1.128292402,-1.15440606,-1.610684843,-1.155871282,-1.139641885,0.700941323,-0.993367025,0.497773973,-0.837915173,-0.994816345,-0.705022737,-0.466544214,-0.666…
GO Process	GO:0032200	Telomere organization	8	56	4.71354	bottom	0.0053	afc	STRG0A56FBJ.g16703.t1,STRG0A56FBJ.g16882.t1,STRG0A56FBJ.g1838.t1,STRG0A56FBJ.g2535.t1,STRG0A56FBJ.g4896.t1,STRG0A56FBJ.g5301.t1,STRG0A56FBJ.g6024.t1,STRG0A56FBJ.g6652.t1	g16703.t1,g16882.t1,g1838.t1,g2535.t1,g4896.t1,g5301.t1,g6024.t1,g6652.t1	g16703.t1,g16882.t1,g1838.t1,g2535.t1,g4896.t1,g5301.t1,g6024.t1,g6652.t1	1.854164198,0.899961293,0.809721044,3.100627509,1.480526783,2.271744918,1.071841893,1.07669455
GO Process	GO:0042274	Ribosomal small subunit biogenesis	16	60	3.55797	bottom	0.0053	afc	STRG0A56FBJ.g10730.t1,STRG0A56FBJ.g11504.t1,STRG0A56FBJ.g11663.t1,STRG0A56FBJ.g12100.t1,STRG0A56FBJ.g12575.t1,STRG0A56FBJ.g13410.t1,STRG0A56FBJ.g13787.t1,STRG0A56FBJ.g14054.t1,STRG0A56FBJ.g14652.t1,STRG0A56FBJ.g15874.t1,STRG0A56FBJ.g1838.t1,STRG0A56FBJ.g2078.t1,STRG0A56FBJ.g2311.t1,STRG0A56FBJ.g2780.t1,STRG0A56FBJ.g7332.t1,STRG0A56FBJ.g9850.t1	g10730.t1,g11504.t1,g11663.t1,g12100.t1,g12575.t1,g13410.t1,g13787.t1,g14054.t1,g14652.t1,g15874.t1,g1838.t1,g2078.t1,g2311.t1,g2780.t1,g7332.t1,g9850.t1	g10730.t1,g11504.t1,g11663.t1,g12100.t1,g12575.t1,g13410.t1,g13787.t1,g14054.t1,g14652.t1,g15874.t1,g1838.t1,g2078.t1,g2311.t1,g2780.t1,g7332.t1,g9850.t1	1.64457019,1.105743019,0.984807174,1.287950954,2.645434198,1.673276068,1.355900429,1.504070629,1.640171576,0.956981837,0.809721044,1.5454733,1.591407605,0.824006556,-2.552743157,1.403844047
GO Process	GO:0000723	Telomere maintenance	7	53	4.91007	bottom	0.0062	afc	STRG0A56FBJ.g16703.t1,STRG0A56FBJ.g16882.t1,STRG0A56FBJ.g1838.t1,STRG0A56FBJ.g2535.t1,STRG0A56FBJ.g4896.t1,STRG0A56FBJ.g5301.t1,STRG0A56FBJ.g6652.t1	g16703.t1,g16882.t1,g1838.t1,g2535.t1,g4896.t1,g5301.t1,g6652.t1	g16703.t1,g16882.t1,g1838.t1,g2535.t1,g4896.t1,g5301.t1,g6652.t1	1.854164198,0.899961293,0.809721044,3.100627509,1.480526783,2.271744918,1.07669455
GO Process	GO:0043628	Small regulatory ncRNA 3-end processing	5	19	5.61707	bottom	0.0064	afc	STRG0A56FBJ.g16382.t1,STRG0A56FBJ.g2843.t1,STRG0A56FBJ.g5301.t1,STRG0A56FBJ.g7601.t1,STRG0A56FBJ.g8501.t1	g16382.t1,g2843.t1,g5301.t1,g7601.t1,g8501.t1	g16382.t1,g2843.t1,g5301.t1,g7601.t1,g8501.t1	1.959919797,2.508444172,2.271744918,1.246038332,1.50886069
GO Process	GO:0006406	mRNA export from nucleus	14	39	3.74346	bottom	0.0066	afc	STRG0A56FBJ.g10039.t1,STRG0A56FBJ.g14143.t1,STRG0A56FBJ.g1520.t1,STRG0A56FBJ.g15228.t1,STRG0A56FBJ.g15473.t1,STRG0A56FBJ.g16042.t1,STRG0A56FBJ.g2302.t1,STRG0A56FBJ.g2502.t1,STRG0A56FBJ.g5145.t1,STRG0A56FBJ.g6070.t1,STRG0A56FBJ.g7320.t1,STRG0A56FBJ.g7492.t1,STRG0A56FBJ.g8572.t1,STRG0A56FBJ.g9847.t1	g10039.t1,g14143.t1,g1520.t1,g15228.t1,g15473.t1,g16042.t1,g2302.t1,g2502.t1,g5145.t1,g6070.t1,g7320.t1,g7492.t1,g8572.t1,g9847.t1	g10039.t1,g14143.t1,g1520.t1,g15228.t1,g15473.t1,g16042.t1,g2302.t1,g2502.t1,g5145.t1,g6070.t1,g7320.t1,g7492.t1,g8572.t1,g9847.t1	1.010755651,1.249711279,0.995120911,1.132724558,0.83304777,0.776000669,1.238412198,1.396302797,2.01513142,1.094162469,1.049031779,0.665511061,1.764419174,1.839864242
GO Process	GO:0072594	Establishment of protein localization to organelle	29	182	2.13266	bottom	0.0067	ks	STRG0A56FBJ.g10813.t1,STRG0A56FBJ.g11285.t1,STRG0A56FBJ.g1237.t1,STRG0A56FBJ.g12610.t1,STRG0A56FBJ.g12683.t1,STRG0A56FBJ.g13120.t1,STRG0A56FBJ.g13823.t1,STRG0A56FBJ.g14236.t1,STRG0A56FBJ.g14357.t1,STRG0A56FBJ.g15473.t1,STRG0A56FBJ.g155.t1,STRG0A56FBJ.g16042.t1,STRG0A56FBJ.g16130.t1,STRG0A56FBJ.g16703.t1,STRG0A56FBJ.g2531.t1,STRG0A56FBJ.g2773.t1,STRG0A56FBJ.g3430.t1,STRG0A56FBJ.g4326.t1,STRG0A56FB…	g10813.t1,g11285.t1,g1237.t1,g12610.t1,g12683.t1,g13120.t1,g13823.t1,g14236.t1,g14357.t1,g15473.t1,g155.t1,g16042.t1,g16130.t1,g16703.t1,g2531.t1,g2773.t1,g3430.t1,g4326.t1,g4440.t1,g4859.t1,g486.t1,g4999.t1,g5804.t1,g5836.t1,g7960.t1,g8605.t1,g924.t1,g9313.t1,g9740.t1	g10813.t1,g11285.t1,g1237.t1,g12610.t1,g12683.t1,g13120.t1,g13823.t1,g14236.t1,g14357.t1,g15473.t1,g155.t1,g16042.t1,g16130.t1,g16703.t1,g2531.t1,g2773.t1,g3430.t1,g4326.t1,g4440.t1,g4859.t1,g486.t1,g4999.t1,g5804.t1,g5836.t1,g7960.t1,g8605.t1,g924.t1,g9313.t1,g9740.t1	-2.900912571,0.772037949,1.285254325,1.034527498,0.860301544,1.388589858,1.181457299,-1.718221854,-1.144543544,0.83304777,1.300966725,0.776000669,0.920546136,1.854164198,1.13787071,0.730633862,-1.15440606,1.088378143,1.006668089,1.577499013,0.687849045,1.300175126,1.039496532,1.000989757,1.114855048,-0.688876432,0.866933321,1.170730081,1.05785696
GO Process	GO:1903047	Mitotic cell cycle process	43	315	2.44286	bottom	0.0069	ks	STRG0A56FBJ.g11450.t1,STRG0A56FBJ.g1274.t1,STRG0A56FBJ.g12918.t1,STRG0A56FBJ.g12939.t1,STRG0A56FBJ.g13240.t1,STRG0A56FBJ.g13267.t1,STRG0A56FBJ.g13497.t1,STRG0A56FBJ.g13554.t1,STRG0A56FBJ.g14048.t1,STRG0A56FBJ.g1411.t1,STRG0A56FBJ.g14290.t1,STRG0A56FBJ.g14438.t1,STRG0A56FBJ.g14821.t1,STRG0A56FBJ.g14855.t1,STRG0A56FBJ.g155.t1,STRG0A56FBJ.g16073.t1,STRG0A56FBJ.g16456.t1,STRG0A56FBJ.g16515.t1,STRG0A5…	g11450.t1,g1274.t1,g12918.t1,g12939.t1,g13240.t1,g13267.t1,g13497.t1,g13554.t1,g14048.t1,g1411.t1,g14290.t1,g14438.t1,g14821.t1,g14855.t1,g155.t1,g16073.t1,g16456.t1,g16515.t1,g1786.t1,g2520.t1,g3744.t1,g4249.t1,g5078.t1,g5495.t1,g5774.t1,g5777.t1,g6108.t1,g6159.t1,g6221.t1,g6262.t1,g6689.t1,g7006.t1,g7055.t1,g7545.t1,g7869.t1,g8176.t1,g8245.t1,g8273.t1,g8661.t1,g8863.t1,g8880.t1,g9322.t1,g9408.t1	g11450.t1,g1274.t1,g12918.t1,g12939.t1,g13240.t1,g13267.t1,g13497.t1,g13554.t1,g14048.t1,g1411.t1,g14290.t1,g14438.t1,g14821.t1,g14855.t1,g155.t1,g16073.t1,g16456.t1,g16515.t1,g1786.t1,g2520.t1,g3744.t1,g4249.t1,g5078.t1,g5495.t1,g5774.t1,g5777.t1,g6108.t1,g6159.t1,g6221.t1,g6262.t1,g6689.t1,g7006.t1,g7055.t1,g7545.t1,g7869.t1,g8176.t1,g8245.t1,g8273.t1,g8661.t1,g8863.t1,g8880.t1,g9322.t1,g9408.t1	1.250435787,0.952117724,0.794797533,1.946426853,1.403764342,0.866781681,1.234002753,1.322662897,0.636373765,1.768671353,0.88774103,1.155434781,1.359583046,-2.081382031,1.300966725,1.740947263,-0.536542184,3.198996552,-0.735907999,0.996657562,-1.955153492,1.644830431,-0.861430248,-2.099263283,-3.59167108,1.237263135,0.849987343,1.583158939,2.150819301,1.904159718,1.05487624,2.348747702,0.971634419…
GO Process	GO:0006950	Response to stress	159	1405	1.34218	bottom	0.0071	ks	STRG0A56FBJ.g10285.t1,STRG0A56FBJ.g10290.t1,STRG0A56FBJ.g10334.t1,STRG0A56FBJ.g1068.t1,STRG0A56FBJ.g109.t1,STRG0A56FBJ.g10956.t1,STRG0A56FBJ.g11146.t1,STRG0A56FBJ.g11149.t1,STRG0A56FBJ.g11151.t1,STRG0A56FBJ.g11267.t1,STRG0A56FBJ.g11360.t1,STRG0A56FBJ.g11431.t1,STRG0A56FBJ.g11691.t1,STRG0A56FBJ.g11760.t1,STRG0A56FBJ.g11879.t1,STRG0A56FBJ.g11938.t1,STRG0A56FBJ.g1200.t1,STRG0A56FBJ.g1221.t1,STRG0A56…	g10285.t1,g10290.t1,g10334.t1,g1068.t1,g109.t1,g10956.t1,g11146.t1,g11149.t1,g11151.t1,g11267.t1,g11360.t1,g11431.t1,g11691.t1,g11760.t1,g11879.t1,g11938.t1,g1200.t1,g1221.t1,g12317.t1,g12480.t1,g12483.t1,g12552.t1,g12683.t1,g12727.t1,g12813.t1,g12837.t1,g12895.t1,g12899.t1,g12914.t1,g12939.t1,g12956.t1,g13040.t1,g13120.t1,g1321.t1,g1322.t1,g1323.t1,g1325.t1,g13267.t1,g13279.t1,g13376.t1,g13436.t…	g10285.t1,g10290.t1,g10334.t1,g1068.t1,g109.t1,g10956.t1,g11146.t1,g11149.t1,g11151.t1,g11267.t1,g11360.t1,g11431.t1,g11691.t1,g11760.t1,g11879.t1,g11938.t1,g1200.t1,g1221.t1,g12317.t1,g12480.t1,g12483.t1,g12552.t1,g12683.t1,g12727.t1,g12813.t1,g12837.t1,g12895.t1,g12899.t1,g12914.t1,g12939.t1,g12956.t1,g13040.t1,g13120.t1,g1321.t1,g1322.t1,g1323.t1,g1325.t1,g13267.t1,g13279.t1,g13376.t1,g13436.t…	0.726460094,-0.769387904,0.980851571,-0.880086988,0.979392542,1.294215006,2.8846113,-2.516745613,0.667149877,0.687874324,-1.036951642,1.33275789,-0.960384032,2.803416794,0.886978057,-1.208859863,-1.450673928,-1.73683163,-1.681764555,-2.28003569,0.716963815,0.570731486,0.860301544,-1.261457075,3.136441327,1.198708879,1.165233075,1.852133369,1.186783884,1.946426853,-1.219385603,-0.951467383,1.38858…
GO Process	GO:0055080	Cation homeostasis	22	224	1.8036	top	0.0072	ks	STRG0A56FBJ.g11860.t1,STRG0A56FBJ.g1221.t1,STRG0A56FBJ.g12686.t1,STRG0A56FBJ.g13592.t1,STRG0A56FBJ.g13593.t1,STRG0A56FBJ.g13939.t1,STRG0A56FBJ.g13953.t1,STRG0A56FBJ.g14139.t1,STRG0A56FBJ.g14231.t1,STRG0A56FBJ.g14298.t1,STRG0A56FBJ.g16329.t1,STRG0A56FBJ.g16341.t1,STRG0A56FBJ.g2111.t1,STRG0A56FBJ.g2322.t1,STRG0A56FBJ.g2416.t1,STRG0A56FBJ.g2682.t1,STRG0A56FBJ.g3509.t1,STRG0A56FBJ.g4106.t1,STRG0A56FB…	g11860.t1,g1221.t1,g12686.t1,g13592.t1,g13593.t1,g13939.t1,g13953.t1,g14139.t1,g14231.t1,g14298.t1,g16329.t1,g16341.t1,g2111.t1,g2322.t1,g2416.t1,g2682.t1,g3509.t1,g4106.t1,g4878.t1,g6529.t1,g6908.t1,g9214.t1	g11860.t1,g1221.t1,g12686.t1,g13592.t1,g13593.t1,g13939.t1,g13953.t1,g14139.t1,g14231.t1,g14298.t1,g16329.t1,g16341.t1,g2111.t1,g2322.t1,g2416.t1,g2682.t1,g3509.t1,g4106.t1,g4878.t1,g6529.t1,g6908.t1,g9214.t1	-1.582309072,-1.73683163,-1.487429083,-1.558126807,-1.53100487,1.259241212,1.027005496,-0.82694579,-1.675223671,-0.947624734,-1.50761623,-0.707627399,-1.024707524,-0.713477866,-0.947345955,-1.187949239,-1.12405145,-1.182175472,-1.965130213,-1.685742854,-1.067430675,-1.014478367
GO Process	GO:0098771	Inorganic ion homeostasis	22	226	1.8036	top	0.0072	ks	STRG0A56FBJ.g11860.t1,STRG0A56FBJ.g1221.t1,STRG0A56FBJ.g12686.t1,STRG0A56FBJ.g13592.t1,STRG0A56FBJ.g13593.t1,STRG0A56FBJ.g13939.t1,STRG0A56FBJ.g13953.t1,STRG0A56FBJ.g14139.t1,STRG0A56FBJ.g14231.t1,STRG0A56FBJ.g14298.t1,STRG0A56FBJ.g16329.t1,STRG0A56FBJ.g16341.t1,STRG0A56FBJ.g2111.t1,STRG0A56FBJ.g2322.t1,STRG0A56FBJ.g2416.t1,STRG0A56FBJ.g2682.t1,STRG0A56FBJ.g3509.t1,STRG0A56FBJ.g4106.t1,STRG0A56FB…	g11860.t1,g1221.t1,g12686.t1,g13592.t1,g13593.t1,g13939.t1,g13953.t1,g14139.t1,g14231.t1,g14298.t1,g16329.t1,g16341.t1,g2111.t1,g2322.t1,g2416.t1,g2682.t1,g3509.t1,g4106.t1,g4878.t1,g6529.t1,g6908.t1,g9214.t1	g11860.t1,g1221.t1,g12686.t1,g13592.t1,g13593.t1,g13939.t1,g13953.t1,g14139.t1,g14231.t1,g14298.t1,g16329.t1,g16341.t1,g2111.t1,g2322.t1,g2416.t1,g2682.t1,g3509.t1,g4106.t1,g4878.t1,g6529.t1,g6908.t1,g9214.t1	-1.582309072,-1.73683163,-1.487429083,-1.558126807,-1.53100487,1.259241212,1.027005496,-0.82694579,-1.675223671,-0.947624734,-1.50761623,-0.707627399,-1.024707524,-0.713477866,-0.947345955,-1.187949239,-1.12405145,-1.182175472,-1.965130213,-1.685742854,-1.067430675,-1.014478367
GO Process	GO:0006402	mRNA catabolic process	20	87	3.19729	bottom	0.0073	afc	STRG0A56FBJ.g12779.t1,STRG0A56FBJ.g13806.t1,STRG0A56FBJ.g13929.t1,STRG0A56FBJ.g14118.t1,STRG0A56FBJ.g14125.t1,STRG0A56FBJ.g14471.t1,STRG0A56FBJ.g15033.t1,STRG0A56FBJ.g16382.t1,STRG0A56FBJ.g16664.t1,STRG0A56FBJ.g16882.t1,STRG0A56FBJ.g3026.t1,STRG0A56FBJ.g3839.t1,STRG0A56FBJ.g5753.t1,STRG0A56FBJ.g5775.t1,STRG0A56FBJ.g7601.t1,STRG0A56FBJ.g7993.t1,STRG0A56FBJ.g8501.t1,STRG0A56FBJ.g8833.t1,STRG0A56FBJ…	g12779.t1,g13806.t1,g13929.t1,g14118.t1,g14125.t1,g14471.t1,g15033.t1,g16382.t1,g16664.t1,g16882.t1,g3026.t1,g3839.t1,g5753.t1,g5775.t1,g7601.t1,g7993.t1,g8501.t1,g8833.t1,g9015.t1,g9954.t1	g12779.t1,g13806.t1,g13929.t1,g14118.t1,g14125.t1,g14471.t1,g15033.t1,g16382.t1,g16664.t1,g16882.t1,g3026.t1,g3839.t1,g5753.t1,g5775.t1,g7601.t1,g7993.t1,g8501.t1,g8833.t1,g9015.t1,g9954.t1	1.60224546,0.741590607,1.370464581,1.072258989,3.057315031,1.150842856,1.162423469,1.959919797,-2.180683348,0.899961293,0.95385127,0.565468887,2.174315398,0.922409522,1.246038332,1.864979394,1.50886069,0.73948922,-1.83298626,1.428258634
GO Process	GO:0090305	Nucleic acid phosphodiester bond hydrolysis	27	246	2.73493	bottom	0.0077	ks	STRG0A56FBJ.g10958.t1,STRG0A56FBJ.g11146.t1,STRG0A56FBJ.g11768.t1,STRG0A56FBJ.g1182.t1,STRG0A56FBJ.g11926.t1,STRG0A56FBJ.g12816.t1,STRG0A56FBJ.g12904.t1,STRG0A56FBJ.g14471.t1,STRG0A56FBJ.g15033.t1,STRG0A56FBJ.g16382.t1,STRG0A56FBJ.g16664.t1,STRG0A56FBJ.g1804.t1,STRG0A56FBJ.g2144.t1,STRG0A56FBJ.g2424.t1,STRG0A56FBJ.g3054.t1,STRG0A56FBJ.g3587.t1,STRG0A56FBJ.g3830.t1,STRG0A56FBJ.g3839.t1,STRG0A56FBJ…	g10958.t1,g11146.t1,g11768.t1,g1182.t1,g11926.t1,g12816.t1,g12904.t1,g14471.t1,g15033.t1,g16382.t1,g16664.t1,g1804.t1,g2144.t1,g2424.t1,g3054.t1,g3587.t1,g3830.t1,g3839.t1,g4234.t1,g4896.t1,g5228.t1,g5700.t1,g5775.t1,g6776.t1,g7601.t1,g8501.t1,g9015.t1	g10958.t1,g11146.t1,g11768.t1,g1182.t1,g11926.t1,g12816.t1,g12904.t1,g14471.t1,g15033.t1,g16382.t1,g16664.t1,g1804.t1,g2144.t1,g2424.t1,g3054.t1,g3587.t1,g3830.t1,g3839.t1,g4234.t1,g4896.t1,g5228.t1,g5700.t1,g5775.t1,g6776.t1,g7601.t1,g8501.t1,g9015.t1	1.61515754,2.8846113,1.684418984,0.682894681,1.048116873,1.567087336,1.154561674,1.150842856,1.162423469,1.959919797,-2.180683348,1.17257759,-0.796717903,-1.430999802,1.291321052,-0.846670521,1.178909648,0.565468887,1.003020849,1.480526783,1.84676331,1.571754604,0.922409522,1.404644675,1.246038332,1.50886069,-1.83298626
GO Process	GO:0009124	Nucleoside monophosphate biosynthetic process	20	39	3.17487	bottom	0.0078	afc	STRG0A56FBJ.g10767.t1,STRG0A56FBJ.g11962.t1,STRG0A56FBJ.g13284.t1,STRG0A56FBJ.g13398.t1,STRG0A56FBJ.g14176.t1,STRG0A56FBJ.g15022.t1,STRG0A56FBJ.g15388.t1,STRG0A56FBJ.g16597.t1,STRG0A56FBJ.g2794.t1,STRG0A56FBJ.g2810.t1,STRG0A56FBJ.g2869.t1,STRG0A56FBJ.g3530.t1,STRG0A56FBJ.g4456.t1,STRG0A56FBJ.g4494.t1,STRG0A56FBJ.g4518.t1,STRG0A56FBJ.g5116.t1,STRG0A56FBJ.g6472.t1,STRG0A56FBJ.g7407.t1,STRG0A56FBJ.g…	g10767.t1,g11962.t1,g13284.t1,g13398.t1,g14176.t1,g15022.t1,g15388.t1,g16597.t1,g2794.t1,g2810.t1,g2869.t1,g3530.t1,g4456.t1,g4494.t1,g4518.t1,g5116.t1,g6472.t1,g7407.t1,g7568.t1,g8235.t1	g10767.t1,g11962.t1,g13284.t1,g13398.t1,g14176.t1,g15022.t1,g15388.t1,g16597.t1,g2794.t1,g2810.t1,g2869.t1,g3530.t1,g4456.t1,g4494.t1,g4518.t1,g5116.t1,g6472.t1,g7407.t1,g7568.t1,g8235.t1	-1.728501851,-1.144588371,0.993408531,1.171325089,3.001770209,-0.77639797,-1.569593078,1.457256998,0.93533056,1.51516926,0.882289132,0.726902622,1.93039483,0.9845753,2.122999306,2.545398756,3.038724571,0.892392579,0.799769512,2.463807787
GO Process	GO:0034504	Protein localization to nucleus	18	114	3.27334	bottom	0.0078	afc	STRG0A56FBJ.g11285.t1,STRG0A56FBJ.g12610.t1,STRG0A56FBJ.g13823.t1,STRG0A56FBJ.g14357.t1,STRG0A56FBJ.g15473.t1,STRG0A56FBJ.g155.t1,STRG0A56FBJ.g16042.t1,STRG0A56FBJ.g16965.t1,STRG0A56FBJ.g2329.t1,STRG0A56FBJ.g2691.t1,STRG0A56FBJ.g4859.t1,STRG0A56FBJ.g486.t1,STRG0A56FBJ.g4999.t1,STRG0A56FBJ.g5804.t1,STRG0A56FBJ.g5836.t1,STRG0A56FBJ.g6189.t1,STRG0A56FBJ.g7960.t1,STRG0A56FBJ.g9762.t1	g11285.t1,g12610.t1,g13823.t1,g14357.t1,g15473.t1,g155.t1,g16042.t1,g16965.t1,g2329.t1,g2691.t1,g4859.t1,g486.t1,g4999.t1,g5804.t1,g5836.t1,g6189.t1,g7960.t1,g9762.t1	g11285.t1,g12610.t1,g13823.t1,g14357.t1,g15473.t1,g155.t1,g16042.t1,g16965.t1,g2329.t1,g2691.t1,g4859.t1,g486.t1,g4999.t1,g5804.t1,g5836.t1,g6189.t1,g7960.t1,g9762.t1	0.772037949,1.034527498,1.181457299,-1.144543544,0.83304777,1.300966725,0.776000669,1.300638842,1.652642254,1.487863113,1.577499013,0.687849045,1.300175126,1.039496532,1.000989757,1.650279322,1.114855048,1.29597289
GO Process	GO:0051247	Positive regulation of protein metabolic process	75	611	1.26854	bottom	0.0078	ks	STRG0A56FBJ.g10334.t1,STRG0A56FBJ.g10754.t1,STRG0A56FBJ.g11066.t1,STRG0A56FBJ.g11151.t1,STRG0A56FBJ.g11360.t1,STRG0A56FBJ.g11763.t1,STRG0A56FBJ.g11879.t1,STRG0A56FBJ.g1221.t1,STRG0A56FBJ.g12282.t1,STRG0A56FBJ.g12296.t1,STRG0A56FBJ.g12448.t1,STRG0A56FBJ.g13267.t1,STRG0A56FBJ.g13415.t1,STRG0A56FBJ.g1380.t1,STRG0A56FBJ.g14268.t1,STRG0A56FBJ.g1441.t1,STRG0A56FBJ.g1495.t1,STRG0A56FBJ.g1496.t1,STRG0A56…	g10334.t1,g10754.t1,g11066.t1,g11151.t1,g11360.t1,g11763.t1,g11879.t1,g1221.t1,g12282.t1,g12296.t1,g12448.t1,g13267.t1,g13415.t1,g1380.t1,g14268.t1,g1441.t1,g1495.t1,g1496.t1,g15152.t1,g15551.t1,g15904.t1,g1608.t1,g16703.t1,g16786.t1,g1838.t1,g1876.t1,g1972.t1,g2004.t1,g2311.t1,g2542.t1,g3430.t1,g3466.t1,g3592.t1,g3646.t1,g4458.t1,g4505.t1,g4812.t1,g4884.t1,g5088.t1,g5137.t1,g5386.t1,g5710.t1,g57…	g10334.t1,g10754.t1,g11066.t1,g11151.t1,g11360.t1,g11763.t1,g11879.t1,g1221.t1,g12282.t1,g12296.t1,g12448.t1,g13267.t1,g13415.t1,g1380.t1,g14268.t1,g1441.t1,g1495.t1,g1496.t1,g15152.t1,g15551.t1,g15904.t1,g1608.t1,g16703.t1,g16786.t1,g1838.t1,g1876.t1,g1972.t1,g2004.t1,g2311.t1,g2542.t1,g3430.t1,g3466.t1,g3592.t1,g3646.t1,g4458.t1,g4505.t1,g4812.t1,g4884.t1,g5088.t1,g5137.t1,g5386.t1,g5710.t1,g57…	0.980851571,1.186857663,-1.083271327,0.667149877,-1.036951642,0.951959336,0.886978057,-1.73683163,1.11437724,0.987723101,-1.269301867,0.866781681,1.223800632,-1.060474227,1.171657699,1.377012035,-2.768579105,-2.318726146,-2.622429672,1.372783485,1.078733911,-1.496946627,1.854164198,1.140496005,0.809721044,-0.894263564,-1.824851009,1.023713969,1.591407605,0.947145543,-1.15440606,-1.610684843,0.809…
GO Process	GO:0033044	Regulation of chromosome organization	19	130	3.22877	bottom	0.008	afc	STRG0A56FBJ.g1274.t1,STRG0A56FBJ.g13240.t1,STRG0A56FBJ.g14265.t1,STRG0A56FBJ.g14427.t1,STRG0A56FBJ.g14847.t1,STRG0A56FBJ.g15331.t1,STRG0A56FBJ.g16073.t1,STRG0A56FBJ.g16510.t1,STRG0A56FBJ.g16625.t1,STRG0A56FBJ.g16664.t1,STRG0A56FBJ.g16703.t1,STRG0A56FBJ.g16882.t1,STRG0A56FBJ.g1838.t1,STRG0A56FBJ.g2311.t1,STRG0A56FBJ.g4249.t1,STRG0A56FBJ.g5301.t1,STRG0A56FBJ.g5774.t1,STRG0A56FBJ.g8245.t1,STRG0A56FB…	g1274.t1,g13240.t1,g14265.t1,g14427.t1,g14847.t1,g15331.t1,g16073.t1,g16510.t1,g16625.t1,g16664.t1,g16703.t1,g16882.t1,g1838.t1,g2311.t1,g4249.t1,g5301.t1,g5774.t1,g8245.t1,g9891.t1	g1274.t1,g13240.t1,g14265.t1,g14427.t1,g14847.t1,g15331.t1,g16073.t1,g16510.t1,g16625.t1,g16664.t1,g16703.t1,g16882.t1,g1838.t1,g2311.t1,g4249.t1,g5301.t1,g5774.t1,g8245.t1,g9891.t1	0.952117724,1.403764342,2.109140945,-1.678474167,2.079494856,1.352159792,1.740947263,2.262894324,2.107518908,-2.180683348,1.854164198,0.899961293,0.809721044,1.591407605,1.644830431,2.271744918,-3.59167108,2.96905522,1.000935899
GO Process	GO:0040012	Regulation of locomotion	42	338	1.04658	top	0.0082	ks	STRG0A56FBJ.g10334.t1,STRG0A56FBJ.g10781.t1,STRG0A56FBJ.g10846.t1,STRG0A56FBJ.g11066.t1,STRG0A56FBJ.g11687.t1,STRG0A56FBJ.g1221.t1,STRG0A56FBJ.g12475.t1,STRG0A56FBJ.g12552.t1,STRG0A56FBJ.g12792.t1,STRG0A56FBJ.g13233.t1,STRG0A56FBJ.g14017.t1,STRG0A56FBJ.g14268.t1,STRG0A56FBJ.g14417.t1,STRG0A56FBJ.g14418.t1,STRG0A56FBJ.g15547.t1,STRG0A56FBJ.g1559.t1,STRG0A56FBJ.g1608.t1,STRG0A56FBJ.g16437.t1,STRG0A…	g10334.t1,g10781.t1,g10846.t1,g11066.t1,g11687.t1,g1221.t1,g12475.t1,g12552.t1,g12792.t1,g13233.t1,g14017.t1,g14268.t1,g14417.t1,g14418.t1,g15547.t1,g1559.t1,g1608.t1,g16437.t1,g16456.t1,g1830.t1,g1972.t1,g2157.t1,g2723.t1,g3072.t1,g3095.t1,g3430.t1,g3466.t1,g3474.t1,g3922.t1,g5200.t1,g5422.t1,g5706.t1,g5730.t1,g5733.t1,g5773.t2,g6006.t1,g6013.t1,g6422.t1,g6612.t1,g7063.t1,g7226.t1,g7992.t1	g10334.t1,g10781.t1,g10846.t1,g11066.t1,g11687.t1,g1221.t1,g12475.t1,g12552.t1,g12792.t1,g13233.t1,g14017.t1,g14268.t1,g14417.t1,g14418.t1,g15547.t1,g1559.t1,g1608.t1,g16437.t1,g16456.t1,g1830.t1,g1972.t1,g2157.t1,g2723.t1,g3072.t1,g3095.t1,g3430.t1,g3466.t1,g3474.t1,g3922.t1,g5200.t1,g5422.t1,g5706.t1,g5730.t1,g5733.t1,g5773.t2,g6006.t1,g6013.t1,g6422.t1,g6612.t1,g7063.t1,g7226.t1,g7992.t1	0.980851571,2.067705148,-1.738312781,-1.083271327,-0.870260402,-1.73683163,0.718685466,0.570731486,-1.140978863,-0.589624411,-1.154508988,1.171657699,-1.983590108,-1.9227885,-1.287056064,1.203339787,-1.496946627,-1.05838029,-0.536542184,-1.065936626,-1.824851009,-1.339020965,-0.791906957,0.673613842,-1.128292402,-1.15440606,-1.610684843,-1.155871282,-1.139641885,0.700941323,-0.993367025,0.4977739…
GO Process	GO:0023052	Signaling	177	2253	0.669239	top	0.0083	ks	STRG0A56FBJ.g10619.t1,STRG0A56FBJ.g1068.t1,STRG0A56FBJ.g10731.t1,STRG0A56FBJ.g10781.t1,STRG0A56FBJ.g1081.t1,STRG0A56FBJ.g11066.t1,STRG0A56FBJ.g1112.t1,STRG0A56FBJ.g11151.t1,STRG0A56FBJ.g11440.t1,STRG0A56FBJ.g11531.t1,STRG0A56FBJ.g11532.t1,STRG0A56FBJ.g1161.t1,STRG0A56FBJ.g11687.t1,STRG0A56FBJ.g11879.t1,STRG0A56FBJ.g11891.t1,STRG0A56FBJ.g11981.t1,STRG0A56FBJ.g11987.t1,STRG0A56FBJ.g12006.t1,STRG0A5…	g10619.t1,g1068.t1,g10731.t1,g10781.t1,g1081.t1,g11066.t1,g1112.t1,g11151.t1,g11440.t1,g11531.t1,g11532.t1,g1161.t1,g11687.t1,g11879.t1,g11891.t1,g11981.t1,g11987.t1,g12006.t1,g12317.t1,g12475.t1,g1274.t1,g12745.t1,g12792.t1,g12914.t1,g12917.t1,g13250.t1,g13267.t1,g1330.t1,g13406.t1,g13564.t1,g13576.t1,g13577.t1,g13683.t1,g13694.t1,g13820.t1,g13907.t1,g14017.t1,g14072.t1,g14073.t1,g14231.t1,g1426…	g10619.t1,g1068.t1,g10731.t1,g10781.t1,g1081.t1,g11066.t1,g1112.t1,g11151.t1,g11440.t1,g11531.t1,g11532.t1,g1161.t1,g11687.t1,g11879.t1,g11891.t1,g11981.t1,g11987.t1,g12006.t1,g12317.t1,g12475.t1,g1274.t1,g12745.t1,g12792.t1,g12914.t1,g12917.t1,g13250.t1,g13267.t1,g1330.t1,g13406.t1,g13564.t1,g13576.t1,g13577.t1,g13683.t1,g13694.t1,g13820.t1,g13907.t1,g14017.t1,g14072.t1,g14073.t1,g14231.t1,g1426…	-0.783492151,-0.880086988,-1.220928341,2.067705148,-0.99620376,-1.083271327,2.352524127,0.667149877,-1.577533877,-0.957180335,-1.839639071,-1.292189872,-0.870260402,0.886978057,-0.88994509,-0.897011105,-1.357705498,-3.326760953,-1.681764555,0.718685466,0.952117724,1.98865,-1.140978863,1.186783884,1.126151849,1.420357293,0.866781681,-0.969703583,-0.508839995,1.623357739,-2.080036116,-2.756418255,-…
GO Process	GO:0000381	Regulation of alternative mRNA splicing, via spliceosome	15	34	3.55951	bottom	0.0085	afc	STRG0A56FBJ.g11626.t1,STRG0A56FBJ.g12779.t1,STRG0A56FBJ.g12931.t1,STRG0A56FBJ.g15090.t1,STRG0A56FBJ.g15227.t1,STRG0A56FBJ.g15609.t1,STRG0A56FBJ.g16482.t1,STRG0A56FBJ.g16866.t1,STRG0A56FBJ.g2174.t1,STRG0A56FBJ.g4339.t1,STRG0A56FBJ.g5088.t1,STRG0A56FBJ.g591.t1,STRG0A56FBJ.g6070.t1,STRG0A56FBJ.g9160.t1,STRG0A56FBJ.g9954.t1	g11626.t1,g12779.t1,g12931.t1,g15090.t1,g15227.t1,g15609.t1,g16482.t1,g16866.t1,g2174.t1,g4339.t1,g5088.t1,g591.t1,g6070.t1,g9160.t1,g9954.t1	g11626.t1,g12779.t1,g12931.t1,g15090.t1,g15227.t1,g15609.t1,g16482.t1,g16866.t1,g2174.t1,g4339.t1,g5088.t1,g591.t1,g6070.t1,g9160.t1,g9954.t1	1.323694824,1.60224546,0.812894382,-0.719726623,1.825505464,0.85298053,1.025867303,1.522671927,1.438168223,1.329450267,1.659652199,1.03594632,1.094162469,1.045789749,1.428258634
GO Process	GO:0030001	Metal ion transport	19	476	2.33773	top	0.009	afc	STRG0A56FBJ.g11860.t1,STRG0A56FBJ.g12686.t1,STRG0A56FBJ.g14231.t1,STRG0A56FBJ.g14677.t1,STRG0A56FBJ.g15487.t1,STRG0A56FBJ.g15887.t1,STRG0A56FBJ.g16329.t1,STRG0A56FBJ.g2682.t1,STRG0A56FBJ.g4106.t1,STRG0A56FBJ.g4417.t1,STRG0A56FBJ.g4878.t1,STRG0A56FBJ.g6061.t1,STRG0A56FBJ.g6908.t1,STRG0A56FBJ.g6981.t1,STRG0A56FBJ.g7313.t1,STRG0A56FBJ.g7599.t1,STRG0A56FBJ.g7642.t1,STRG0A56FBJ.g8489.t1,STRG0A56FBJ.g9…	g11860.t1,g12686.t1,g14231.t1,g14677.t1,g15487.t1,g15887.t1,g16329.t1,g2682.t1,g4106.t1,g4417.t1,g4878.t1,g6061.t1,g6908.t1,g6981.t1,g7313.t1,g7599.t1,g7642.t1,g8489.t1,g9214.t1	g11860.t1,g12686.t1,g14231.t1,g14677.t1,g15487.t1,g15887.t1,g16329.t1,g2682.t1,g4106.t1,g4417.t1,g4878.t1,g6061.t1,g6908.t1,g6981.t1,g7313.t1,g7599.t1,g7642.t1,g8489.t1,g9214.t1	-1.582309072,-1.487429083,-1.675223671,-1.55881541,-2.744545311,-1.234696136,-1.50761623,-1.187949239,-1.182175472,1.116722362,-1.965130213,1.029515151,-1.067430675,-3.170356601,-2.603965705,-1.572527261,-0.921536779,-0.835400115,-1.014478367
GO Process	GO:2000278	Regulation of DNA biosynthetic process	10	47	4.16347	bottom	0.0097	afc	STRG0A56FBJ.g14265.t1,STRG0A56FBJ.g14847.t1,STRG0A56FBJ.g16510.t1,STRG0A56FBJ.g16625.t1,STRG0A56FBJ.g16664.t1,STRG0A56FBJ.g16727.t1,STRG0A56FBJ.g1838.t1,STRG0A56FBJ.g2311.t1,STRG0A56FBJ.g5301.t1,STRG0A56FBJ.g8257.t1	g14265.t1,g14847.t1,g16510.t1,g16625.t1,g16664.t1,g16727.t1,g1838.t1,g2311.t1,g5301.t1,g8257.t1	g14265.t1,g14847.t1,g16510.t1,g16625.t1,g16664.t1,g16727.t1,g1838.t1,g2311.t1,g5301.t1,g8257.t1	2.109140945,2.079494856,2.262894324,2.107518908,-2.180683348,0.677920055,0.809721044,1.591407605,2.271744918,1.978067575
GO Function	GO:0003735	Structural constituent of ribosome	92	169	4.26153	bottom	2.71e-24	ks	STRG0A56FBJ.g10203.t1,STRG0A56FBJ.g10684.t1,STRG0A56FBJ.g11253.t1,STRG0A56FBJ.g11465.t1,STRG0A56FBJ.g11504.t1,STRG0A56FBJ.g11663.t1,STRG0A56FBJ.g11763.t1,STRG0A56FBJ.g1192.t1,STRG0A56FBJ.g12100.t1,STRG0A56FBJ.g1219.t1,STRG0A56FBJ.g13157.t1,STRG0A56FBJ.g13273.t1,STRG0A56FBJ.g1340.t1,STRG0A56FBJ.g13409.t1,STRG0A56FBJ.g13410.t1,STRG0A56FBJ.g1354.t1,STRG0A56FBJ.g13625.t1,STRG0A56FBJ.g13787.t1,STRG0A5…	g10203.t1,g10684.t1,g11253.t1,g11465.t1,g11504.t1,g11663.t1,g11763.t1,g1192.t1,g12100.t1,g1219.t1,g13157.t1,g13273.t1,g1340.t1,g13409.t1,g13410.t1,g1354.t1,g13625.t1,g13787.t1,g13925.t1,g14054.t1,g14358.t1,g1444.t1,g14630.t1,g15116.t1,g1514.t1,g15160.t1,g15212.t1,g15218.t1,g1535.t1,g1535.t2,g15449.t1,g15551.t1,g15591.t1,g15743.t1,g1593.t1,g15998.t1,g16326.t1,g16427.t1,g16431.t1,g16551.t1,g16564.t…	g10203.t1,g10684.t1,g11253.t1,g11465.t1,g11504.t1,g11663.t1,g11763.t1,g1192.t1,g12100.t1,g1219.t1,g13157.t1,g13273.t1,g1340.t1,g13409.t1,g13410.t1,g1354.t1,g13625.t1,g13787.t1,g13925.t1,g14054.t1,g14358.t1,g1444.t1,g14630.t1,g15116.t1,g1514.t1,g15160.t1,g15212.t1,g15218.t1,g1535.t1,g1535.t2,g15449.t1,g15551.t1,g15591.t1,g15743.t1,g1593.t1,g15998.t1,g16326.t1,g16427.t1,g16431.t1,g16551.t1,g16564.t…	1.619615035,-0.889829061,1.891088684,1.599012746,1.105743019,0.984807174,0.951959336,1.087326021,1.287950954,1.563463688,1.441324248,1.407417647,1.719048723,1.673972191,1.673276068,1.150934065,0.786543387,1.355900429,1.613424018,1.504070629,1.520111173,1.716054386,0.868518109,0.740091894,1.60631234,1.568176472,1.722395593,1.282244351,1.419876938,1.634524996,1.203211457,1.372783485,1.635916011,1.8…
GO Function	GO:0003729	mRNA binding	72	204	3.64685	bottom	3.53e-11	ks	STRG0A56FBJ.g10133.t1,STRG0A56FBJ.g10308.t1,STRG0A56FBJ.g10684.t1,STRG0A56FBJ.g10715.t1,STRG0A56FBJ.g11285.t1,STRG0A56FBJ.g11449.t1,STRG0A56FBJ.g11663.t1,STRG0A56FBJ.g11953.t1,STRG0A56FBJ.g12282.t1,STRG0A56FBJ.g12573.t1,STRG0A56FBJ.g12731.t1,STRG0A56FBJ.g12779.t1,STRG0A56FBJ.g12868.t1,STRG0A56FBJ.g12931.t1,STRG0A56FBJ.g12958.t1,STRG0A56FBJ.g13050.t1,STRG0A56FBJ.g13053.t1,STRG0A56FBJ.g13929.t1,STR…	g10133.t1,g10308.t1,g10684.t1,g10715.t1,g11285.t1,g11449.t1,g11663.t1,g11953.t1,g12282.t1,g12573.t1,g12731.t1,g12779.t1,g12868.t1,g12931.t1,g12958.t1,g13050.t1,g13053.t1,g13929.t1,g14265.t1,g14268.t1,g14298.t1,g1441.t1,g1464.t1,g15090.t1,g1520.t1,g15227.t1,g15449.t1,g15608.t1,g15609.t1,g16037.t1,g16337.t1,g16482.t1,g2023.t1,g2174.t1,g2175.t1,g2302.t1,g2502.t1,g2542.t1,g2676.t1,g2735.t1,g3585.t1,g…	g10133.t1,g10308.t1,g10684.t1,g10715.t1,g11285.t1,g11449.t1,g11663.t1,g11953.t1,g12282.t1,g12573.t1,g12731.t1,g12779.t1,g12868.t1,g12931.t1,g12958.t1,g13050.t1,g13053.t1,g13929.t1,g14265.t1,g14268.t1,g14298.t1,g1441.t1,g1464.t1,g15090.t1,g1520.t1,g15227.t1,g15449.t1,g15608.t1,g15609.t1,g16037.t1,g16337.t1,g16482.t1,g2023.t1,g2174.t1,g2175.t1,g2302.t1,g2502.t1,g2542.t1,g2676.t1,g2735.t1,g3585.t1,g…	1.383833489,1.978994003,-0.889829061,1.058697364,0.772037949,0.775495539,0.984807174,1.345128774,1.11437724,1.499703474,1.924057709,1.60224546,0.970214216,0.812894382,1.163260983,0.965357409,0.93934618,1.370464581,2.109140945,1.171657699,-0.947624734,1.377012035,1.277212664,-0.719726623,0.995120911,1.825505464,1.203211457,0.589338969,0.85298053,0.617361382,1.433353378,1.025867303,1.334102159,1.43…
GO Function	GO:0005198	Structural molecule activity	143	401	2.08597	bottom	2.8e-10	ks	STRG0A56FBJ.g10203.t1,STRG0A56FBJ.g10684.t1,STRG0A56FBJ.g11253.t1,STRG0A56FBJ.g11465.t1,STRG0A56FBJ.g11504.t1,STRG0A56FBJ.g1163.t1,STRG0A56FBJ.g11663.t1,STRG0A56FBJ.g11667.t1,STRG0A56FBJ.g11763.t1,STRG0A56FBJ.g1192.t1,STRG0A56FBJ.g12100.t1,STRG0A56FBJ.g1219.t1,STRG0A56FBJ.g12475.t1,STRG0A56FBJ.g13157.t1,STRG0A56FBJ.g1321.t1,STRG0A56FBJ.g1322.t1,STRG0A56FBJ.g1323.t1,STRG0A56FBJ.g13233.t1,STRG0A56F…	g10203.t1,g10684.t1,g11253.t1,g11465.t1,g11504.t1,g1163.t1,g11663.t1,g11667.t1,g11763.t1,g1192.t1,g12100.t1,g1219.t1,g12475.t1,g13157.t1,g1321.t1,g1322.t1,g1323.t1,g13233.t1,g1325.t1,g13273.t1,g1340.t1,g13409.t1,g13410.t1,g1354.t1,g13625.t1,g13787.t1,g13925.t1,g14054.t1,g14255.t1,g14262.t1,g14357.t1,g14358.t1,g14407.t1,g1444.t1,g14630.t1,g15116.t1,g1514.t1,g15160.t1,g15212.t1,g15218.t1,g15322.t1,…	g10203.t1,g10684.t1,g11253.t1,g11465.t1,g11504.t1,g1163.t1,g11663.t1,g11667.t1,g11763.t1,g1192.t1,g12100.t1,g1219.t1,g12475.t1,g13157.t1,g1321.t1,g1322.t1,g1323.t1,g13233.t1,g1325.t1,g13273.t1,g1340.t1,g13409.t1,g13410.t1,g1354.t1,g13625.t1,g13787.t1,g13925.t1,g14054.t1,g14255.t1,g14262.t1,g14357.t1,g14358.t1,g14407.t1,g1444.t1,g14630.t1,g15116.t1,g1514.t1,g15160.t1,g15212.t1,g15218.t1,g15322.t1,…	1.619615035,-0.889829061,1.891088684,1.599012746,1.105743019,-3.157142953,0.984807174,-0.789696722,0.951959336,1.087326021,1.287950954,1.563463688,0.718685466,1.441324248,-1.003654427,-0.583720916,-1.105933301,-0.589624411,-0.703300437,1.407417647,1.719048723,1.673972191,1.673276068,1.150934065,0.786543387,1.355900429,1.613424018,1.504070629,-0.775988852,0.996871352,-1.144543544,1.520111173,-4.29…
GO Function	GO:0003677	DNA binding	102	1183	3.29384	bottom	4.17e-10	ks	STRG0A56FBJ.g10308.t1,STRG0A56FBJ.g10552.t1,STRG0A56FBJ.g10824.t1,STRG0A56FBJ.g109.t1,STRG0A56FBJ.g10943.t1,STRG0A56FBJ.g11146.t1,STRG0A56FBJ.g11149.t1,STRG0A56FBJ.g11369.t1,STRG0A56FBJ.g1182.t1,STRG0A56FBJ.g1206.t1,STRG0A56FBJ.g12813.t1,STRG0A56FBJ.g12837.t1,STRG0A56FBJ.g12868.t1,STRG0A56FBJ.g12895.t1,STRG0A56FBJ.g12939.t1,STRG0A56FBJ.g13240.t1,STRG0A56FBJ.g13279.t1,STRG0A56FBJ.g13497.t1,STRG0A5…	g10308.t1,g10552.t1,g10824.t1,g109.t1,g10943.t1,g11146.t1,g11149.t1,g11369.t1,g1182.t1,g1206.t1,g12813.t1,g12837.t1,g12868.t1,g12895.t1,g12939.t1,g13240.t1,g13279.t1,g13497.t1,g13547.t1,g13564.t1,g13728.t1,g13973.t1,g14053.t1,g14123.t1,g14405.t1,g14981.t1,g14993.t1,g15039.t1,g15361.t1,g15498.t1,g15608.t1,g15821.t1,g15828.t1,g16062.t1,g16073.t1,g1628.t1,g16314.t1,g16327.t1,g16515.t1,g16595.t1,g167…	g10308.t1,g10552.t1,g10824.t1,g109.t1,g10943.t1,g11146.t1,g11149.t1,g11369.t1,g1182.t1,g1206.t1,g12813.t1,g12837.t1,g12868.t1,g12895.t1,g12939.t1,g13240.t1,g13279.t1,g13497.t1,g13547.t1,g13564.t1,g13728.t1,g13973.t1,g14053.t1,g14123.t1,g14405.t1,g14981.t1,g14993.t1,g15039.t1,g15361.t1,g15498.t1,g15608.t1,g15821.t1,g15828.t1,g16062.t1,g16073.t1,g1628.t1,g16314.t1,g16327.t1,g16515.t1,g16595.t1,g167…	1.978994003,1.798344637,3.076915162,0.979392542,1.621072939,2.8846113,-2.516745613,1.07180322,0.682894681,0.896245211,3.136441327,1.198708879,0.970214216,1.165233075,1.946426853,1.403764342,2.9608896,1.234002753,-0.871294044,1.623357739,-1.379090193,0.89763724,1.403403191,1.488579723,1.002378107,0.863436214,0.871068579,1.39339247,1.05637019,2.583958876,0.589338969,-1.099318525,-0.605570412,-1.626…
GO Function	GO:0140640	Catalytic activity, acting on a nucleic acid	83	529	3.11115	bottom	2.6e-09	ks	STRG0A56FBJ.g10039.t1,STRG0A56FBJ.g10552.t1,STRG0A56FBJ.g10878.t1,STRG0A56FBJ.g11146.t1,STRG0A56FBJ.g11148.t1,STRG0A56FBJ.g11200.t1,STRG0A56FBJ.g11768.t1,STRG0A56FBJ.g11926.t1,STRG0A56FBJ.g11999.t1,STRG0A56FBJ.g1226.t1,STRG0A56FBJ.g12722.t1,STRG0A56FBJ.g12816.t1,STRG0A56FBJ.g12904.t1,STRG0A56FBJ.g12939.t1,STRG0A56FBJ.g12972.t1,STRG0A56FBJ.g13127.t1,STRG0A56FBJ.g13148.t1,STRG0A56FBJ.g13272.t1,STRG…	g10039.t1,g10552.t1,g10878.t1,g11146.t1,g11148.t1,g11200.t1,g11768.t1,g11926.t1,g11999.t1,g1226.t1,g12722.t1,g12816.t1,g12904.t1,g12939.t1,g12972.t1,g13127.t1,g13148.t1,g13272.t1,g13403.t1,g13564.t1,g13718.t1,g14243.t1,g14300.t1,g14405.t1,g14888.t1,g14981.t1,g15062.t1,g15309.t1,g15326.t1,g15397.t1,g15498.t1,g15871.t1,g15915.t1,g16515.t1,g16664.t1,g16703.t1,g16882.t1,g1804.t1,g1837.t1,g1838.t1,g21…	g10039.t1,g10552.t1,g10878.t1,g11146.t1,g11148.t1,g11200.t1,g11768.t1,g11926.t1,g11999.t1,g1226.t1,g12722.t1,g12816.t1,g12904.t1,g12939.t1,g12972.t1,g13127.t1,g13148.t1,g13272.t1,g13403.t1,g13564.t1,g13718.t1,g14243.t1,g14300.t1,g14405.t1,g14888.t1,g14981.t1,g15062.t1,g15309.t1,g15326.t1,g15397.t1,g15498.t1,g15871.t1,g15915.t1,g16515.t1,g16664.t1,g16703.t1,g16882.t1,g1804.t1,g1837.t1,g1838.t1,g21…	1.010755651,1.798344637,1.209600662,2.8846113,1.284905058,0.787680476,1.684418984,1.048116873,0.877772701,0.906831892,0.677328044,1.567087336,1.154561674,1.946426853,0.728851337,1.027408517,0.812650421,1.420638048,2.214116895,1.623357739,0.949910569,1.524443724,1.023585677,1.002378107,1.60276862,0.863436214,1.201352438,0.83213681,0.839474537,0.857327905,2.583958876,-1.389163794,0.60778817,3.19899…
GO Function	GO:0045182	Translation regulator activity	42	107	3.75605	bottom	2.73e-09	ks	STRG0A56FBJ.g1065.t1,STRG0A56FBJ.g10878.t1,STRG0A56FBJ.g11763.t1,STRG0A56FBJ.g11765.t1,STRG0A56FBJ.g12914.t1,STRG0A56FBJ.g13260.t1,STRG0A56FBJ.g13415.t1,STRG0A56FBJ.g13929.t1,STRG0A56FBJ.g14300.t1,STRG0A56FBJ.g14342.t1,STRG0A56FBJ.g1472.t1,STRG0A56FBJ.g15448.t1,STRG0A56FBJ.g16236.t1,STRG0A56FBJ.g16407.t1,STRG0A56FBJ.g16501.t1,STRG0A56FBJ.g16622.t1,STRG0A56FBJ.g16709.t1,STRG0A56FBJ.g16786.t1,STRG0…	g1065.t1,g10878.t1,g11763.t1,g11765.t1,g12914.t1,g13260.t1,g13415.t1,g13929.t1,g14300.t1,g14342.t1,g1472.t1,g15448.t1,g16236.t1,g16407.t1,g16501.t1,g16622.t1,g16709.t1,g16786.t1,g16921.t1,g16953.t1,g2023.t1,g2430.t1,g2542.t1,g2844.t1,g3124.t1,g3646.t1,g4185.t1,g4280.t1,g5088.t1,g5226.t1,g5248.t1,g5249.t1,g5674.t1,g5990.t1,g6116.t1,g6314.t1,g7859.t1,g8379.t1,g8394.t1,g8899.t1,g8899.t2,g8948.t1	g1065.t1,g10878.t1,g11763.t1,g11765.t1,g12914.t1,g13260.t1,g13415.t1,g13929.t1,g14300.t1,g14342.t1,g1472.t1,g15448.t1,g16236.t1,g16407.t1,g16501.t1,g16622.t1,g16709.t1,g16786.t1,g16921.t1,g16953.t1,g2023.t1,g2430.t1,g2542.t1,g2844.t1,g3124.t1,g3646.t1,g4185.t1,g4280.t1,g5088.t1,g5226.t1,g5248.t1,g5249.t1,g5674.t1,g5990.t1,g6116.t1,g6314.t1,g7859.t1,g8379.t1,g8394.t1,g8899.t1,g8899.t2,g8948.t1	1.892385441,1.209600662,0.951959336,1.127115123,1.186783884,1.535837816,1.223800632,1.370464581,1.023585677,1.398157082,1.267105688,1.097593899,1.34917892,1.823552318,1.03137856,1.099890853,0.80445511,1.140496005,1.124474133,1.378645564,1.334102159,1.487165134,0.947145543,1.603193747,1.490712222,1.298419329,1.473090771,1.569831294,1.659652199,1.096739035,0.935043448,1.195311406,1.195467903,0.6648…
GO Function	GO:0090079	Translation regulator activity, nucleic acid binding	40	92	3.74463	bottom	8.55e-09	ks	STRG0A56FBJ.g1065.t1,STRG0A56FBJ.g10878.t1,STRG0A56FBJ.g11765.t1,STRG0A56FBJ.g12914.t1,STRG0A56FBJ.g13260.t1,STRG0A56FBJ.g13415.t1,STRG0A56FBJ.g13929.t1,STRG0A56FBJ.g14300.t1,STRG0A56FBJ.g14342.t1,STRG0A56FBJ.g1472.t1,STRG0A56FBJ.g15448.t1,STRG0A56FBJ.g16236.t1,STRG0A56FBJ.g16407.t1,STRG0A56FBJ.g16501.t1,STRG0A56FBJ.g16622.t1,STRG0A56FBJ.g16709.t1,STRG0A56FBJ.g16786.t1,STRG0A56FBJ.g16921.t1,STRG0…	g1065.t1,g10878.t1,g11765.t1,g12914.t1,g13260.t1,g13415.t1,g13929.t1,g14300.t1,g14342.t1,g1472.t1,g15448.t1,g16236.t1,g16407.t1,g16501.t1,g16622.t1,g16709.t1,g16786.t1,g16921.t1,g16953.t1,g2023.t1,g2430.t1,g2542.t1,g2844.t1,g3124.t1,g3646.t1,g4185.t1,g4280.t1,g5226.t1,g5248.t1,g5249.t1,g5674.t1,g5990.t1,g6116.t1,g6314.t1,g7859.t1,g8379.t1,g8394.t1,g8899.t1,g8899.t2,g8948.t1	g1065.t1,g10878.t1,g11765.t1,g12914.t1,g13260.t1,g13415.t1,g13929.t1,g14300.t1,g14342.t1,g1472.t1,g15448.t1,g16236.t1,g16407.t1,g16501.t1,g16622.t1,g16709.t1,g16786.t1,g16921.t1,g16953.t1,g2023.t1,g2430.t1,g2542.t1,g2844.t1,g3124.t1,g3646.t1,g4185.t1,g4280.t1,g5226.t1,g5248.t1,g5249.t1,g5674.t1,g5990.t1,g6116.t1,g6314.t1,g7859.t1,g8379.t1,g8394.t1,g8899.t1,g8899.t2,g8948.t1	1.892385441,1.209600662,1.127115123,1.186783884,1.535837816,1.223800632,1.370464581,1.023585677,1.398157082,1.267105688,1.097593899,1.34917892,1.823552318,1.03137856,1.099890853,0.80445511,1.140496005,1.124474133,1.378645564,1.334102159,1.487165134,0.947145543,1.603193747,1.490712222,1.298419329,1.473090771,1.569831294,1.096739035,0.935043448,1.195311406,1.195467903,0.664857581,0.761954417,1.1547…
GO Function	GO:0008135	Translation factor activity, RNA binding	36	79	3.72379	bottom	1.01e-07	ks	STRG0A56FBJ.g1065.t1,STRG0A56FBJ.g10878.t1,STRG0A56FBJ.g11765.t1,STRG0A56FBJ.g12914.t1,STRG0A56FBJ.g13929.t1,STRG0A56FBJ.g14300.t1,STRG0A56FBJ.g14342.t1,STRG0A56FBJ.g1472.t1,STRG0A56FBJ.g15448.t1,STRG0A56FBJ.g16236.t1,STRG0A56FBJ.g16407.t1,STRG0A56FBJ.g16501.t1,STRG0A56FBJ.g16622.t1,STRG0A56FBJ.g16709.t1,STRG0A56FBJ.g16786.t1,STRG0A56FBJ.g16921.t1,STRG0A56FBJ.g16953.t1,STRG0A56FBJ.g2023.t1,STRG0A…	g1065.t1,g10878.t1,g11765.t1,g12914.t1,g13929.t1,g14300.t1,g14342.t1,g1472.t1,g15448.t1,g16236.t1,g16407.t1,g16501.t1,g16622.t1,g16709.t1,g16786.t1,g16921.t1,g16953.t1,g2023.t1,g2430.t1,g2542.t1,g2844.t1,g3124.t1,g4185.t1,g4280.t1,g5226.t1,g5248.t1,g5249.t1,g5674.t1,g5990.t1,g6116.t1,g6314.t1,g8379.t1,g8394.t1,g8899.t1,g8899.t2,g8948.t1	g1065.t1,g10878.t1,g11765.t1,g12914.t1,g13929.t1,g14300.t1,g14342.t1,g1472.t1,g15448.t1,g16236.t1,g16407.t1,g16501.t1,g16622.t1,g16709.t1,g16786.t1,g16921.t1,g16953.t1,g2023.t1,g2430.t1,g2542.t1,g2844.t1,g3124.t1,g4185.t1,g4280.t1,g5226.t1,g5248.t1,g5249.t1,g5674.t1,g5990.t1,g6116.t1,g6314.t1,g8379.t1,g8394.t1,g8899.t1,g8899.t2,g8948.t1	1.892385441,1.209600662,1.127115123,1.186783884,1.370464581,1.023585677,1.398157082,1.267105688,1.097593899,1.34917892,1.823552318,1.03137856,1.099890853,0.80445511,1.140496005,1.124474133,1.378645564,1.334102159,1.487165134,0.947145543,1.603193747,1.490712222,1.473090771,1.569831294,1.096739035,0.935043448,1.195311406,1.195467903,0.664857581,0.761954417,1.154708524,1.644331734,0.920838004,0.8667…
GO Function	GO:0140098	Catalytic activity, acting on RNA	60	335	2.84322	bottom	2.08e-07	ks	STRG0A56FBJ.g10039.t1,STRG0A56FBJ.g10552.t1,STRG0A56FBJ.g10878.t1,STRG0A56FBJ.g11146.t1,STRG0A56FBJ.g11148.t1,STRG0A56FBJ.g11200.t1,STRG0A56FBJ.g11768.t1,STRG0A56FBJ.g11926.t1,STRG0A56FBJ.g11999.t1,STRG0A56FBJ.g1226.t1,STRG0A56FBJ.g12722.t1,STRG0A56FBJ.g12816.t1,STRG0A56FBJ.g12904.t1,STRG0A56FBJ.g12972.t1,STRG0A56FBJ.g13127.t1,STRG0A56FBJ.g13148.t1,STRG0A56FBJ.g13272.t1,STRG0A56FBJ.g13403.t1,STRG…	g10039.t1,g10552.t1,g10878.t1,g11146.t1,g11148.t1,g11200.t1,g11768.t1,g11926.t1,g11999.t1,g1226.t1,g12722.t1,g12816.t1,g12904.t1,g12972.t1,g13127.t1,g13148.t1,g13272.t1,g13403.t1,g13718.t1,g14243.t1,g14300.t1,g14888.t1,g14981.t1,g15062.t1,g15309.t1,g15326.t1,g15397.t1,g15871.t1,g15915.t1,g16664.t1,g16882.t1,g1804.t1,g1837.t1,g2144.t1,g2410.t1,g2424.t1,g2692.t1,g2843.t1,g3125.t1,g3726.t1,g3839.t1,…	g10039.t1,g10552.t1,g10878.t1,g11146.t1,g11148.t1,g11200.t1,g11768.t1,g11926.t1,g11999.t1,g1226.t1,g12722.t1,g12816.t1,g12904.t1,g12972.t1,g13127.t1,g13148.t1,g13272.t1,g13403.t1,g13718.t1,g14243.t1,g14300.t1,g14888.t1,g14981.t1,g15062.t1,g15309.t1,g15326.t1,g15397.t1,g15871.t1,g15915.t1,g16664.t1,g16882.t1,g1804.t1,g1837.t1,g2144.t1,g2410.t1,g2424.t1,g2692.t1,g2843.t1,g3125.t1,g3726.t1,g3839.t1,…	1.010755651,1.798344637,1.209600662,2.8846113,1.284905058,0.787680476,1.684418984,1.048116873,0.877772701,0.906831892,0.677328044,1.567087336,1.154561674,0.728851337,1.027408517,0.812650421,1.420638048,2.214116895,0.949910569,1.524443724,1.023585677,1.60276862,0.863436214,1.201352438,0.83213681,0.839474537,0.857327905,-1.389163794,0.60778817,-2.180683348,0.899961293,1.17257759,1.119870399,-0.7967…
GO Function	GO:0003697	Single-stranded DNA binding	16	64	5.01739	bottom	1.81e-06	afc	STRG0A56FBJ.g11149.t1,STRG0A56FBJ.g1182.t1,STRG0A56FBJ.g12939.t1,STRG0A56FBJ.g13240.t1,STRG0A56FBJ.g14405.t1,STRG0A56FBJ.g15498.t1,STRG0A56FBJ.g16073.t1,STRG0A56FBJ.g16515.t1,STRG0A56FBJ.g2520.t1,STRG0A56FBJ.g2535.t1,STRG0A56FBJ.g3823.t1,STRG0A56FBJ.g5003.t1,STRG0A56FBJ.g7006.t1,STRG0A56FBJ.g7206.t1,STRG0A56FBJ.g8189.t1,STRG0A56FBJ.g8245.t1	g11149.t1,g1182.t1,g12939.t1,g13240.t1,g14405.t1,g15498.t1,g16073.t1,g16515.t1,g2520.t1,g2535.t1,g3823.t1,g5003.t1,g7006.t1,g7206.t1,g8189.t1,g8245.t1	g11149.t1,g1182.t1,g12939.t1,g13240.t1,g14405.t1,g15498.t1,g16073.t1,g16515.t1,g2520.t1,g2535.t1,g3823.t1,g5003.t1,g7006.t1,g7206.t1,g8189.t1,g8245.t1	-2.516745613,0.682894681,1.946426853,1.403764342,1.002378107,2.583958876,1.740947263,3.198996552,0.996657562,3.100627509,2.905608074,2.572178959,2.348747702,1.271535258,0.687377784,2.96905522
GO Function	GO:0003743	Translation initiation factor activity	25	49	3.91319	bottom	1.81e-06	ks	STRG0A56FBJ.g1065.t1,STRG0A56FBJ.g10878.t1,STRG0A56FBJ.g11765.t1,STRG0A56FBJ.g12914.t1,STRG0A56FBJ.g14342.t1,STRG0A56FBJ.g1472.t1,STRG0A56FBJ.g16236.t1,STRG0A56FBJ.g16407.t1,STRG0A56FBJ.g16501.t1,STRG0A56FBJ.g16786.t1,STRG0A56FBJ.g16921.t1,STRG0A56FBJ.g16953.t1,STRG0A56FBJ.g2023.t1,STRG0A56FBJ.g2430.t1,STRG0A56FBJ.g2542.t1,STRG0A56FBJ.g2844.t1,STRG0A56FBJ.g3124.t1,STRG0A56FBJ.g4280.t1,STRG0A56FBJ…	g1065.t1,g10878.t1,g11765.t1,g12914.t1,g14342.t1,g1472.t1,g16236.t1,g16407.t1,g16501.t1,g16786.t1,g16921.t1,g16953.t1,g2023.t1,g2430.t1,g2542.t1,g2844.t1,g3124.t1,g4280.t1,g5248.t1,g5249.t1,g5990.t1,g6314.t1,g8379.t1,g8394.t1,g8948.t1	g1065.t1,g10878.t1,g11765.t1,g12914.t1,g14342.t1,g1472.t1,g16236.t1,g16407.t1,g16501.t1,g16786.t1,g16921.t1,g16953.t1,g2023.t1,g2430.t1,g2542.t1,g2844.t1,g3124.t1,g4280.t1,g5248.t1,g5249.t1,g5990.t1,g6314.t1,g8379.t1,g8394.t1,g8948.t1	1.892385441,1.209600662,1.127115123,1.186783884,1.398157082,1.267105688,1.34917892,1.823552318,1.03137856,1.140496005,1.124474133,1.378645564,1.334102159,1.487165134,0.947145543,1.603193747,1.490712222,1.569831294,0.935043448,1.195311406,0.664857581,1.154708524,1.644331734,0.920838004,1.132118898
GO Function	GO:0004180	Carboxypeptidase activity	15	73	4.20504	top	1.81e-06	afc	STRG0A56FBJ.g10019.t1,STRG0A56FBJ.g10020.t1,STRG0A56FBJ.g10921.t1,STRG0A56FBJ.g10922.t1,STRG0A56FBJ.g12120.t1,STRG0A56FBJ.g1292.t1,STRG0A56FBJ.g1293.t1,STRG0A56FBJ.g12966.t1,STRG0A56FBJ.g13034.t1,STRG0A56FBJ.g13310.t1,STRG0A56FBJ.g13311.t1,STRG0A56FBJ.g15960.t1,STRG0A56FBJ.g4015.t1,STRG0A56FBJ.g7082.t1,STRG0A56FBJ.g7926.t1	g10019.t1,g10020.t1,g10921.t1,g10922.t1,g12120.t1,g1292.t1,g1293.t1,g12966.t1,g13034.t1,g13310.t1,g13311.t1,g15960.t1,g4015.t1,g7082.t1,g7926.t1	g10019.t1,g10020.t1,g10921.t1,g10922.t1,g12120.t1,g1292.t1,g1293.t1,g12966.t1,g13034.t1,g13310.t1,g13311.t1,g15960.t1,g4015.t1,g7082.t1,g7926.t1	-2.939099794,-3.976519189,-2.279717712,-2.260036243,-0.771826468,-3.111383668,-4.76863538,-1.968680967,-1.790876946,-2.558497734,-1.901191379,-1.278378353,-1.28491108,-1.129089932,-2.034138954
GO Function	GO:0003774	Cytoskeletal motor activity	39	121	2.85233	top	2.98e-06	ks	STRG0A56FBJ.g10314.t1,STRG0A56FBJ.g10320.t1,STRG0A56FBJ.g10858.t1,STRG0A56FBJ.g11123.t1,STRG0A56FBJ.g11147.t1,STRG0A56FBJ.g12026.t1,STRG0A56FBJ.g12355.t1,STRG0A56FBJ.g13046.t1,STRG0A56FBJ.g13061.t1,STRG0A56FBJ.g13599.t1,STRG0A56FBJ.g13698.t1,STRG0A56FBJ.g13835.t1,STRG0A56FBJ.g14485.t1,STRG0A56FBJ.g15308.t1,STRG0A56FBJ.g15558.t1,STRG0A56FBJ.g15776.t1,STRG0A56FBJ.g16848.t1,STRG0A56FBJ.g17017.t1,STR…	g10314.t1,g10320.t1,g10858.t1,g11123.t1,g11147.t1,g12026.t1,g12355.t1,g13046.t1,g13061.t1,g13599.t1,g13698.t1,g13835.t1,g14485.t1,g15308.t1,g15558.t1,g15776.t1,g16848.t1,g17017.t1,g2172.t1,g2681.t1,g3399.t1,g3438.t1,g3508.t1,g3744.t1,g4415.t1,g5774.t1,g6058.t1,g6064.t1,g6276.t1,g6698.t1,g6799.t1,g6884.t1,g8131.t1,g8202.t1,g8302.t1,g8331.t3,g8424.t1,g891.t1,g9099.t1	g10314.t1,g10320.t1,g10858.t1,g11123.t1,g11147.t1,g12026.t1,g12355.t1,g13046.t1,g13061.t1,g13599.t1,g13698.t1,g13835.t1,g14485.t1,g15308.t1,g15558.t1,g15776.t1,g16848.t1,g17017.t1,g2172.t1,g2681.t1,g3399.t1,g3438.t1,g3508.t1,g3744.t1,g4415.t1,g5774.t1,g6058.t1,g6064.t1,g6276.t1,g6698.t1,g6799.t1,g6884.t1,g8131.t1,g8202.t1,g8302.t1,g8331.t3,g8424.t1,g891.t1,g9099.t1	-0.611404417,-1.70176532,-1.841552909,-1.699788862,-0.975709064,0.870119299,-1.309788907,-1.012870911,-0.720494618,-2.698331529,-1.830988909,-1.634305602,-1.936317347,-1.000636617,-1.426171263,-1.472710602,-1.855338098,-1.171609195,-2.161468004,-1.8568849,-1.075779746,-0.565693193,-1.645874695,-1.955153492,-0.784995087,-3.59167108,-3.289864903,-1.572103721,-2.594262392,-1.771108942,-1.169926409,-…
GO Function	GO:0005509	Calcium ion binding	75	536	1.78524	top	5.79e-06	ks	STRG0A56FBJ.g10165.t1,STRG0A56FBJ.g1081.t1,STRG0A56FBJ.g10924.t1,STRG0A56FBJ.g111.t1,STRG0A56FBJ.g1114.t1,STRG0A56FBJ.g11271.t1,STRG0A56FBJ.g11294.t1,STRG0A56FBJ.g11531.t1,STRG0A56FBJ.g11532.t1,STRG0A56FBJ.g11861.t1,STRG0A56FBJ.g11889.t1,STRG0A56FBJ.g11897.t1,STRG0A56FBJ.g11927.t1,STRG0A56FBJ.g12079.t1,STRG0A56FBJ.g12301.t1,STRG0A56FBJ.g12371.t1,STRG0A56FBJ.g12448.t1,STRG0A56FBJ.g12475.t1,STRG0A5…	g10165.t1,g1081.t1,g10924.t1,g111.t1,g1114.t1,g11271.t1,g11294.t1,g11531.t1,g11532.t1,g11861.t1,g11889.t1,g11897.t1,g11927.t1,g12079.t1,g12301.t1,g12371.t1,g12448.t1,g12475.t1,g12483.t1,g12789.t1,g12917.t1,g12926.t1,g13188.t1,g13530.t1,g13567.t1,g13694.t1,g13710.t1,g14139.t1,g14188.t1,g1447.t1,g14678.t1,g14855.t1,g14943.t1,g15310.t1,g15407.t1,g15450.t1,g15777.t1,g15778.t1,g16366.t1,g1761.t1,g1859…	g10165.t1,g1081.t1,g10924.t1,g111.t1,g1114.t1,g11271.t1,g11294.t1,g11531.t1,g11532.t1,g11861.t1,g11889.t1,g11897.t1,g11927.t1,g12079.t1,g12301.t1,g12371.t1,g12448.t1,g12475.t1,g12483.t1,g12789.t1,g12917.t1,g12926.t1,g13188.t1,g13530.t1,g13567.t1,g13694.t1,g13710.t1,g14139.t1,g14188.t1,g1447.t1,g14678.t1,g14855.t1,g14943.t1,g15310.t1,g15407.t1,g15450.t1,g15777.t1,g15778.t1,g16366.t1,g1761.t1,g1859…	-0.940037998,-0.99620376,-1.822056587,-0.534656023,-0.814607868,-1.195279626,-1.843613446,-0.957180335,-1.839639071,-2.71888276,-1.688348551,-1.971276355,-1.544457976,-1.575232994,1.446184606,-1.199925809,-1.269301867,0.718685466,0.716963815,-0.685019363,1.126151849,-2.207566853,-1.142462417,-1.193014371,-2.400641123,-1.291342296,-0.637439202,-0.82694579,-0.924234766,-1.484125818,1.282589578,-2.0…
GO Function	GO:0043021	Ribonucleoprotein complex binding	30	104	4.01201	bottom	5.79e-06	ks	STRG0A56FBJ.g12731.t1,STRG0A56FBJ.g12743.t1,STRG0A56FBJ.g12914.t1,STRG0A56FBJ.g12958.t1,STRG0A56FBJ.g13354.t1,STRG0A56FBJ.g13540.t1,STRG0A56FBJ.g14123.t1,STRG0A56FBJ.g14268.t1,STRG0A56FBJ.g14697.t1,STRG0A56FBJ.g1472.t1,STRG0A56FBJ.g15551.t1,STRG0A56FBJ.g16130.t1,STRG0A56FBJ.g16236.t1,STRG0A56FBJ.g2430.t1,STRG0A56FBJ.g3054.t1,STRG0A56FBJ.g3646.t1,STRG0A56FBJ.g4163.t1,STRG0A56FBJ.g4172.t1,STRG0A56F…	g12731.t1,g12743.t1,g12914.t1,g12958.t1,g13354.t1,g13540.t1,g14123.t1,g14268.t1,g14697.t1,g1472.t1,g15551.t1,g16130.t1,g16236.t1,g2430.t1,g3054.t1,g3646.t1,g4163.t1,g4172.t1,g4280.t1,g5130.t1,g6086.t1,g6314.t1,g6819.t1,g7117.t1,g7631.t1,g7704.t1,g8189.t1,g8899.t1,g8899.t2,g9010.t1	g12731.t1,g12743.t1,g12914.t1,g12958.t1,g13354.t1,g13540.t1,g14123.t1,g14268.t1,g14697.t1,g1472.t1,g15551.t1,g16130.t1,g16236.t1,g2430.t1,g3054.t1,g3646.t1,g4163.t1,g4172.t1,g4280.t1,g5130.t1,g6086.t1,g6314.t1,g6819.t1,g7117.t1,g7631.t1,g7704.t1,g8189.t1,g8899.t1,g8899.t2,g9010.t1	1.924057709,1.582722382,1.186783884,1.163260983,1.008715029,1.224376792,1.488579723,1.171657699,1.401597345,1.267105688,1.372783485,0.920546136,1.34917892,1.487165134,1.291321052,1.298419329,1.007511204,0.960838419,1.569831294,1.177666374,0.609275931,1.154708524,2.884532399,1.549419224,1.693972121,1.173210304,0.687377784,0.866737309,0.817729744,2.190687016
GO Function	GO:0003777	Microtubule motor activity	26	86	3.16261	top	6.79e-06	ks	STRG0A56FBJ.g10314.t1,STRG0A56FBJ.g10858.t1,STRG0A56FBJ.g11123.t1,STRG0A56FBJ.g12026.t1,STRG0A56FBJ.g12355.t1,STRG0A56FBJ.g13061.t1,STRG0A56FBJ.g13599.t1,STRG0A56FBJ.g13835.t1,STRG0A56FBJ.g14485.t1,STRG0A56FBJ.g15558.t1,STRG0A56FBJ.g16848.t1,STRG0A56FBJ.g2172.t1,STRG0A56FBJ.g2681.t1,STRG0A56FBJ.g3744.t1,STRG0A56FBJ.g4415.t1,STRG0A56FBJ.g5774.t1,STRG0A56FBJ.g6058.t1,STRG0A56FBJ.g6276.t1,STRG0A56FB…	g10314.t1,g10858.t1,g11123.t1,g12026.t1,g12355.t1,g13061.t1,g13599.t1,g13835.t1,g14485.t1,g15558.t1,g16848.t1,g2172.t1,g2681.t1,g3744.t1,g4415.t1,g5774.t1,g6058.t1,g6276.t1,g6698.t1,g6884.t1,g8131.t1,g8202.t1,g8302.t1,g8424.t1,g891.t1,g9099.t1	g10314.t1,g10858.t1,g11123.t1,g12026.t1,g12355.t1,g13061.t1,g13599.t1,g13835.t1,g14485.t1,g15558.t1,g16848.t1,g2172.t1,g2681.t1,g3744.t1,g4415.t1,g5774.t1,g6058.t1,g6276.t1,g6698.t1,g6884.t1,g8131.t1,g8202.t1,g8302.t1,g8424.t1,g891.t1,g9099.t1	-0.611404417,-1.841552909,-1.699788862,0.870119299,-1.309788907,-0.720494618,-2.698331529,-1.634305602,-1.936317347,-1.426171263,-1.855338098,-2.161468004,-1.8568849,-1.955153492,-0.784995087,-3.59167108,-3.289864903,-2.594262392,-1.771108942,-1.273906812,-2.441421265,-1.38321964,-1.640206758,-2.057423035,-2.271075302,-1.364810146
GO Function	GO:0051082	Unfolded protein binding	31	91	4.34628	bottom	9.22e-06	ks	STRG0A56FBJ.g12899.t1,STRG0A56FBJ.g1411.t1,STRG0A56FBJ.g14265.t1,STRG0A56FBJ.g14370.t1,STRG0A56FBJ.g14847.t1,STRG0A56FBJ.g14987.t1,STRG0A56FBJ.g15649.t1,STRG0A56FBJ.g15717.t1,STRG0A56FBJ.g16510.t1,STRG0A56FBJ.g16536.t1,STRG0A56FBJ.g16625.t1,STRG0A56FBJ.g16626.t1,STRG0A56FBJ.g2500.t1,STRG0A56FBJ.g2527.t1,STRG0A56FBJ.g2672.t1,STRG0A56FBJ.g3024.t1,STRG0A56FBJ.g3346.t1,STRG0A56FBJ.g4269.t1,STRG0A56FB…	g12899.t1,g1411.t1,g14265.t1,g14370.t1,g14847.t1,g14987.t1,g15649.t1,g15717.t1,g16510.t1,g16536.t1,g16625.t1,g16626.t1,g2500.t1,g2527.t1,g2672.t1,g3024.t1,g3346.t1,g4269.t1,g4295.t1,g4326.t1,g4910.t1,g5366.t1,g5596.t1,g6977.t1,g7924.t1,g7946.t1,g8344.t1,g8344.t2,g8578.t1,g8956.t1,g9197.t1	g12899.t1,g1411.t1,g14265.t1,g14370.t1,g14847.t1,g14987.t1,g15649.t1,g15717.t1,g16510.t1,g16536.t1,g16625.t1,g16626.t1,g2500.t1,g2527.t1,g2672.t1,g3024.t1,g3346.t1,g4269.t1,g4295.t1,g4326.t1,g4910.t1,g5366.t1,g5596.t1,g6977.t1,g7924.t1,g7946.t1,g8344.t1,g8344.t2,g8578.t1,g8956.t1,g9197.t1	1.852133369,1.768671353,2.109140945,0.618484044,2.079494856,1.905848155,1.236155861,1.925691658,2.262894324,1.986322403,2.107518908,1.955568928,1.770203848,1.747312737,0.638012909,1.87695033,0.760071975,-1.680451403,0.787329876,1.088378143,0.779086533,0.602846021,1.181251645,-1.060956336,0.866895209,1.647285637,2.558143933,3.491418706,1.876991677,1.979612739,1.841174462
GO Function	GO:0008289	Lipid binding	70	406	1.82137	top	1.27e-05	ks	STRG0A56FBJ.g1054.t1,STRG0A56FBJ.g1054.t2,STRG0A56FBJ.g10924.t1,STRG0A56FBJ.g10978.t1,STRG0A56FBJ.g11050.t1,STRG0A56FBJ.g11051.t1,STRG0A56FBJ.g111.t1,STRG0A56FBJ.g1184.t1,STRG0A56FBJ.g11889.t1,STRG0A56FBJ.g11927.t1,STRG0A56FBJ.g12164.t1,STRG0A56FBJ.g12170.t1,STRG0A56FBJ.g12333.t1,STRG0A56FBJ.g12334.t1,STRG0A56FBJ.g12515.t1,STRG0A56FBJ.g12918.t1,STRG0A56FBJ.g12926.t1,STRG0A56FBJ.g13460.t1,STRG0A56…	g1054.t1,g1054.t2,g10924.t1,g10978.t1,g11050.t1,g11051.t1,g111.t1,g1184.t1,g11889.t1,g11927.t1,g12164.t1,g12170.t1,g12333.t1,g12334.t1,g12515.t1,g12918.t1,g12926.t1,g13460.t1,g13970.t1,g14217.t1,g14240.t1,g14255.t1,g14281.t1,g14283.t1,g14406.t1,g1479.t1,g14902.t1,g15310.t1,g15450.t1,g15562.t1,g16100.t1,g16348.t1,g16467.t1,g16468.t1,g16980.t1,g16987.t1,g17015.t1,g1932.t1,g287.t1,g2960.t1,g3672.t1,…	g1054.t1,g1054.t2,g10924.t1,g10978.t1,g11050.t1,g11051.t1,g111.t1,g1184.t1,g11889.t1,g11927.t1,g12164.t1,g12170.t1,g12333.t1,g12334.t1,g12515.t1,g12918.t1,g12926.t1,g13460.t1,g13970.t1,g14217.t1,g14240.t1,g14255.t1,g14281.t1,g14283.t1,g14406.t1,g1479.t1,g14902.t1,g15310.t1,g15450.t1,g15562.t1,g16100.t1,g16348.t1,g16467.t1,g16468.t1,g16980.t1,g16987.t1,g17015.t1,g1932.t1,g287.t1,g2960.t1,g3672.t1,…	-1.614412262,-2.291080842,-1.822056587,-1.79462914,-1.854393798,-1.754072964,-0.534656023,-0.558880673,-1.688348551,-1.544457976,-2.975742936,-3.214961242,-1.392196703,-2.238113402,-1.070251877,0.794797533,-2.207566853,0.805829882,-1.018052161,1.17969918,-1.430806923,-0.775988852,-1.434318152,-0.733600441,-2.519233849,-2.520916647,-1.444125956,-1.799782587,-0.962450803,-0.673759346,-2.530509893,-…
GO Function	GO:0003682	Chromatin binding	45	294	3.22553	bottom	1.84e-05	ks	STRG0A56FBJ.g11531.t1,STRG0A56FBJ.g11532.t1,STRG0A56FBJ.g1206.t1,STRG0A56FBJ.g12575.t1,STRG0A56FBJ.g12813.t1,STRG0A56FBJ.g13240.t1,STRG0A56FBJ.g13250.t1,STRG0A56FBJ.g13279.t1,STRG0A56FBJ.g13480.t1,STRG0A56FBJ.g13694.t1,STRG0A56FBJ.g13973.t1,STRG0A56FBJ.g14053.t1,STRG0A56FBJ.g14143.t1,STRG0A56FBJ.g14160.t1,STRG0A56FBJ.g14405.t1,STRG0A56FBJ.g14981.t1,STRG0A56FBJ.g16073.t1,STRG0A56FBJ.g16703.t1,STRG…	g11531.t1,g11532.t1,g1206.t1,g12575.t1,g12813.t1,g13240.t1,g13250.t1,g13279.t1,g13480.t1,g13694.t1,g13973.t1,g14053.t1,g14143.t1,g14160.t1,g14405.t1,g14981.t1,g16073.t1,g16703.t1,g16882.t1,g2175.t1,g2489.t1,g2520.t1,g3830.t1,g4049.t1,g4123.t1,g4505.t1,g4896.t1,g5130.t1,g5836.t1,g599.t1,g6086.t1,g651.t1,g6691.t1,g6719.t1,g7055.t1,g7175.t1,g7265.t1,g7268.t1,g7531.t1,g7975.t1,g8189.t1,g8283.t1,g9705…	g11531.t1,g11532.t1,g1206.t1,g12575.t1,g12813.t1,g13240.t1,g13250.t1,g13279.t1,g13480.t1,g13694.t1,g13973.t1,g14053.t1,g14143.t1,g14160.t1,g14405.t1,g14981.t1,g16073.t1,g16703.t1,g16882.t1,g2175.t1,g2489.t1,g2520.t1,g3830.t1,g4049.t1,g4123.t1,g4505.t1,g4896.t1,g5130.t1,g5836.t1,g599.t1,g6086.t1,g651.t1,g6691.t1,g6719.t1,g7055.t1,g7175.t1,g7265.t1,g7268.t1,g7531.t1,g7975.t1,g8189.t1,g8283.t1,g9705…	-0.957180335,-1.839639071,0.896245211,2.645434198,3.136441327,1.403764342,1.420357293,2.9608896,1.083975433,-1.291342296,0.89763724,1.403403191,1.249711279,1.410958354,1.002378107,0.863436214,1.740947263,1.854164198,0.899961293,0.942603195,1.593126435,0.996657562,1.178909648,-1.902540373,0.656338424,-0.658541943,1.480526783,1.177666374,1.000989757,0.740816954,0.609275931,1.976941467,1.028068556,0…
GO Function	GO:0016491	Oxidoreductase activity	161	995	1.1267	top	3.29e-05	ks	STRG0A56FBJ.g10249.t1,STRG0A56FBJ.g10290.t1,STRG0A56FBJ.g10660.t1,STRG0A56FBJ.g10690.t1,STRG0A56FBJ.g10703.t1,STRG0A56FBJ.g10789.t1,STRG0A56FBJ.g10833.t1,STRG0A56FBJ.g10839.t1,STRG0A56FBJ.g10975.t1,STRG0A56FBJ.g11267.t1,STRG0A56FBJ.g11538.t1,STRG0A56FBJ.g11541.t1,STRG0A56FBJ.g11543.t1,STRG0A56FBJ.g11588.t1,STRG0A56FBJ.g11601.t1,STRG0A56FBJ.g11633.t1,STRG0A56FBJ.g11658.t1,STRG0A56FBJ.g11691.t1,STR…	g10249.t1,g10290.t1,g10660.t1,g10690.t1,g10703.t1,g10789.t1,g10833.t1,g10839.t1,g10975.t1,g11267.t1,g11538.t1,g11541.t1,g11543.t1,g11588.t1,g11601.t1,g11633.t1,g11658.t1,g11691.t1,g11723.t1,g11760.t1,g1225.t1,g12480.t1,g12818.t1,g12869.t1,g12896.t1,g12898.t1,g12956.t1,g13040.t1,g13250.t1,g13376.t1,g13451.t1,g13547.t1,g1359.t1,g13592.t1,g13593.t1,g13701.t1,g13711.t1,g13864.t1,g13895.t1,g13953.t1,g…	g10249.t1,g10290.t1,g10660.t1,g10690.t1,g10703.t1,g10789.t1,g10833.t1,g10839.t1,g10975.t1,g11267.t1,g11538.t1,g11541.t1,g11543.t1,g11588.t1,g11601.t1,g11633.t1,g11658.t1,g11691.t1,g11723.t1,g11760.t1,g1225.t1,g12480.t1,g12818.t1,g12869.t1,g12896.t1,g12898.t1,g12956.t1,g13040.t1,g13250.t1,g13376.t1,g13451.t1,g13547.t1,g1359.t1,g13592.t1,g13593.t1,g13701.t1,g13711.t1,g13864.t1,g13895.t1,g13953.t1,g…	0.963537693,-0.769387904,-1.529435728,-1.012187087,-1.622559879,-1.392209881,-1.2972136,0.588116581,-0.755805256,0.687874324,-1.305824839,-2.409930835,-2.283875353,-1.674451582,-1.976102221,-1.647450966,0.708569642,-0.960384032,-1.707625266,2.803416794,-1.363826186,-2.28003569,-0.781367483,-1.732083659,-2.347295095,-1.468283716,-1.219385603,-0.951467383,1.420357293,-1.755358636,0.561786194,-0.871…
GO Function	GO:0044183	Protein folding chaperone	20	40	4.13271	bottom	8e-05	afc	STRG0A56FBJ.g13120.t1,STRG0A56FBJ.g14265.t1,STRG0A56FBJ.g14370.t1,STRG0A56FBJ.g14397.t1,STRG0A56FBJ.g14847.t1,STRG0A56FBJ.g14987.t1,STRG0A56FBJ.g15577.t1,STRG0A56FBJ.g15717.t1,STRG0A56FBJ.g16510.t1,STRG0A56FBJ.g16536.t1,STRG0A56FBJ.g16625.t1,STRG0A56FBJ.g16626.t1,STRG0A56FBJ.g16879.t1,STRG0A56FBJ.g2500.t1,STRG0A56FBJ.g3841.t1,STRG0A56FBJ.g4295.t1,STRG0A56FBJ.g5596.t1,STRG0A56FBJ.g6977.t1,STRG0A56…	g13120.t1,g14265.t1,g14370.t1,g14397.t1,g14847.t1,g14987.t1,g15577.t1,g15717.t1,g16510.t1,g16536.t1,g16625.t1,g16626.t1,g16879.t1,g2500.t1,g3841.t1,g4295.t1,g5596.t1,g6977.t1,g7924.t1,g8956.t1	g13120.t1,g14265.t1,g14370.t1,g14397.t1,g14847.t1,g14987.t1,g15577.t1,g15717.t1,g16510.t1,g16536.t1,g16625.t1,g16626.t1,g16879.t1,g2500.t1,g3841.t1,g4295.t1,g5596.t1,g6977.t1,g7924.t1,g8956.t1	1.388589858,2.109140945,0.618484044,0.921343217,2.079494856,1.905848155,1.149860767,1.925691658,2.262894324,1.986322403,2.107518908,1.955568928,0.770973841,1.770203848,0.490170788,0.787329876,1.181251645,-1.060956336,0.866895209,1.979612739
GO Function	GO:0005215	Transporter activity	53	1146	2.11141	top	8.18e-05	ks	STRG0A56FBJ.g10239.t1,STRG0A56FBJ.g10978.t1,STRG0A56FBJ.g11286.t1,STRG0A56FBJ.g11860.t1,STRG0A56FBJ.g11909.t1,STRG0A56FBJ.g12080.t1,STRG0A56FBJ.g12096.t1,STRG0A56FBJ.g12327.t1,STRG0A56FBJ.g12333.t1,STRG0A56FBJ.g12334.t1,STRG0A56FBJ.g12686.t1,STRG0A56FBJ.g12776.t1,STRG0A56FBJ.g12948.t1,STRG0A56FBJ.g13232.t1,STRG0A56FBJ.g13420.t1,STRG0A56FBJ.g14231.t1,STRG0A56FBJ.g14677.t1,STRG0A56FBJ.g1479.t1,STRG…	g10239.t1,g10978.t1,g11286.t1,g11860.t1,g11909.t1,g12080.t1,g12096.t1,g12327.t1,g12333.t1,g12334.t1,g12686.t1,g12776.t1,g12948.t1,g13232.t1,g13420.t1,g14231.t1,g14677.t1,g1479.t1,g15487.t1,g15562.t1,g15887.t1,g16251.t1,g16329.t1,g16791.t1,g1742.t1,g2013.t1,g2322.t1,g2416.t1,g2634.t1,g2682.t1,g2962.t1,g3308.t1,g4106.t1,g4117.t1,g4312.t1,g4330.t1,g4417.t1,g5512.t1,g6061.t1,g6981.t1,g7188.t1,g7313.t…	g10239.t1,g10978.t1,g11286.t1,g11860.t1,g11909.t1,g12080.t1,g12096.t1,g12327.t1,g12333.t1,g12334.t1,g12686.t1,g12776.t1,g12948.t1,g13232.t1,g13420.t1,g14231.t1,g14677.t1,g1479.t1,g15487.t1,g15562.t1,g15887.t1,g16251.t1,g16329.t1,g16791.t1,g1742.t1,g2013.t1,g2322.t1,g2416.t1,g2634.t1,g2682.t1,g2962.t1,g3308.t1,g4106.t1,g4117.t1,g4312.t1,g4330.t1,g4417.t1,g5512.t1,g6061.t1,g6981.t1,g7188.t1,g7313.t…	-1.287233032,-1.79462914,-0.733803761,-1.582309072,-3.137446324,-1.983173447,-1.143696305,-1.734820699,-1.392196703,-2.238113402,-1.487429083,-0.776943094,-1.69738072,-1.600701384,-0.585097553,-1.675223671,-1.55881541,-2.520916647,-2.744545311,-0.673759346,-1.234696136,-1.956691115,-1.50761623,-0.742556223,-1.637874353,1.368429666,-0.713477866,-0.947345955,-2.572433884,-1.187949239,-2.147871691,-…
GO Function	GO:0003678	DNA helicase activity	13	53	4.87673	bottom	8.75e-05	afc	STRG0A56FBJ.g12939.t1,STRG0A56FBJ.g15498.t1,STRG0A56FBJ.g16515.t1,STRG0A56FBJ.g16703.t1,STRG0A56FBJ.g16882.t1,STRG0A56FBJ.g1838.t1,STRG0A56FBJ.g5003.t1,STRG0A56FBJ.g5013.t1,STRG0A56FBJ.g6652.t1,STRG0A56FBJ.g7006.t1,STRG0A56FBJ.g8189.t1,STRG0A56FBJ.g8245.t1,STRG0A56FBJ.g8648.t1	g12939.t1,g15498.t1,g16515.t1,g16703.t1,g16882.t1,g1838.t1,g5003.t1,g5013.t1,g6652.t1,g7006.t1,g8189.t1,g8245.t1,g8648.t1	g12939.t1,g15498.t1,g16515.t1,g16703.t1,g16882.t1,g1838.t1,g5003.t1,g5013.t1,g6652.t1,g7006.t1,g8189.t1,g8245.t1,g8648.t1	1.946426853,2.583958876,3.198996552,1.854164198,0.899961293,0.809721044,2.572178959,1.809277871,1.07669455,2.348747702,0.687377784,2.96905522,-1.567835685
GO Function	GO:0008094	ATP-dependent activity, acting on DNA	16	97	4.50116	bottom	8.75e-05	afc	STRG0A56FBJ.g12939.t1,STRG0A56FBJ.g15498.t1,STRG0A56FBJ.g16515.t1,STRG0A56FBJ.g16703.t1,STRG0A56FBJ.g16882.t1,STRG0A56FBJ.g1838.t1,STRG0A56FBJ.g2520.t1,STRG0A56FBJ.g5003.t1,STRG0A56FBJ.g5013.t1,STRG0A56FBJ.g599.t1,STRG0A56FBJ.g6652.t1,STRG0A56FBJ.g7006.t1,STRG0A56FBJ.g7055.t1,STRG0A56FBJ.g8189.t1,STRG0A56FBJ.g8245.t1,STRG0A56FBJ.g8648.t1	g12939.t1,g15498.t1,g16515.t1,g16703.t1,g16882.t1,g1838.t1,g2520.t1,g5003.t1,g5013.t1,g599.t1,g6652.t1,g7006.t1,g7055.t1,g8189.t1,g8245.t1,g8648.t1	g12939.t1,g15498.t1,g16515.t1,g16703.t1,g16882.t1,g1838.t1,g2520.t1,g5003.t1,g5013.t1,g599.t1,g6652.t1,g7006.t1,g7055.t1,g8189.t1,g8245.t1,g8648.t1	1.946426853,2.583958876,3.198996552,1.854164198,0.899961293,0.809721044,0.996657562,2.572178959,1.809277871,0.740816954,1.07669455,2.348747702,0.971634419,0.687377784,2.96905522,-1.567835685
GO Function	GO:0004181	Metallocarboxypeptidase activity	6	46	5.43586	top	9.19e-05	afc	STRG0A56FBJ.g10019.t1,STRG0A56FBJ.g10020.t1,STRG0A56FBJ.g1292.t1,STRG0A56FBJ.g1293.t1,STRG0A56FBJ.g15960.t1,STRG0A56FBJ.g4015.t1	g10019.t1,g10020.t1,g1292.t1,g1293.t1,g15960.t1,g4015.t1	g10019.t1,g10020.t1,g1292.t1,g1293.t1,g15960.t1,g4015.t1	-2.939099794,-3.976519189,-3.111383668,-4.76863538,-1.278378353,-1.28491108
GO Function	GO:0008238	Exopeptidase activity	36	119	2.88023	top	9.19e-05	ks	STRG0A56FBJ.g10019.t1,STRG0A56FBJ.g10020.t1,STRG0A56FBJ.g10921.t1,STRG0A56FBJ.g10922.t1,STRG0A56FBJ.g11608.t1,STRG0A56FBJ.g11609.t1,STRG0A56FBJ.g12120.t1,STRG0A56FBJ.g12338.t1,STRG0A56FBJ.g12344.t1,STRG0A56FBJ.g12345.t1,STRG0A56FBJ.g1292.t1,STRG0A56FBJ.g1293.t1,STRG0A56FBJ.g12966.t1,STRG0A56FBJ.g13034.t1,STRG0A56FBJ.g13310.t1,STRG0A56FBJ.g13311.t1,STRG0A56FBJ.g13629.t1,STRG0A56FBJ.g13644.t1,STRG0…	g10019.t1,g10020.t1,g10921.t1,g10922.t1,g11608.t1,g11609.t1,g12120.t1,g12338.t1,g12344.t1,g12345.t1,g1292.t1,g1293.t1,g12966.t1,g13034.t1,g13310.t1,g13311.t1,g13629.t1,g13644.t1,g1380.t1,g1540.t1,g15960.t1,g1608.t1,g4015.t1,g4206.t1,g4468.t1,g5148.t1,g6022.t1,g6663.t1,g7082.t1,g7460.t1,g7463.t1,g7464.t1,g7926.t1,g8930.t1,g9203.t1,g9204.t1	g10019.t1,g10020.t1,g10921.t1,g10922.t1,g11608.t1,g11609.t1,g12120.t1,g12338.t1,g12344.t1,g12345.t1,g1292.t1,g1293.t1,g12966.t1,g13034.t1,g13310.t1,g13311.t1,g13629.t1,g13644.t1,g1380.t1,g1540.t1,g15960.t1,g1608.t1,g4015.t1,g4206.t1,g4468.t1,g5148.t1,g6022.t1,g6663.t1,g7082.t1,g7460.t1,g7463.t1,g7464.t1,g7926.t1,g8930.t1,g9203.t1,g9204.t1	-2.939099794,-3.976519189,-2.279717712,-2.260036243,-2.458708054,-1.560342674,-0.771826468,-1.893806679,-2.252173554,-1.298621144,-3.111383668,-4.76863538,-1.968680967,-1.790876946,-2.558497734,-1.901191379,1.685755738,-0.963325401,-1.060474227,0.643513276,-1.278378353,-1.496946627,-1.28491108,-1.002915662,0.551218892,-1.740329312,1.172488622,-1.496839223,-1.129089932,-1.158221176,-1.173539629,-3…
GO Function	GO:0016887	ATP hydrolysis activity	69	236	2.41594	bottom	0.00017	ks	STRG0A56FBJ.g10039.t1,STRG0A56FBJ.g10878.t1,STRG0A56FBJ.g11148.t1,STRG0A56FBJ.g12026.t1,STRG0A56FBJ.g12355.t1,STRG0A56FBJ.g12686.t1,STRG0A56FBJ.g12899.t1,STRG0A56FBJ.g12939.t1,STRG0A56FBJ.g12948.t1,STRG0A56FBJ.g13240.t1,STRG0A56FBJ.g13354.t1,STRG0A56FBJ.g13599.t1,STRG0A56FBJ.g14231.t1,STRG0A56FBJ.g14265.t1,STRG0A56FBJ.g14370.t1,STRG0A56FBJ.g14847.t1,STRG0A56FBJ.g15062.t1,STRG0A56FBJ.g15498.t1,STR…	g10039.t1,g10878.t1,g11148.t1,g12026.t1,g12355.t1,g12686.t1,g12899.t1,g12939.t1,g12948.t1,g13240.t1,g13354.t1,g13599.t1,g14231.t1,g14265.t1,g14370.t1,g14847.t1,g15062.t1,g15498.t1,g15717.t1,g15904.t1,g15915.t1,g16073.t1,g16426.t1,g16510.t1,g16515.t1,g16536.t1,g16625.t1,g16626.t1,g16703.t1,g16727.t1,g16735.t1,g16763.t1,g16882.t1,g16924.t1,g2004.t1,g2410.t1,g2520.t1,g2682.t1,g3744.t1,g4610.t1,g4950…	g10039.t1,g10878.t1,g11148.t1,g12026.t1,g12355.t1,g12686.t1,g12899.t1,g12939.t1,g12948.t1,g13240.t1,g13354.t1,g13599.t1,g14231.t1,g14265.t1,g14370.t1,g14847.t1,g15062.t1,g15498.t1,g15717.t1,g15904.t1,g15915.t1,g16073.t1,g16426.t1,g16510.t1,g16515.t1,g16536.t1,g16625.t1,g16626.t1,g16703.t1,g16727.t1,g16735.t1,g16763.t1,g16882.t1,g16924.t1,g2004.t1,g2410.t1,g2520.t1,g2682.t1,g3744.t1,g4610.t1,g4950…	1.010755651,1.209600662,1.284905058,0.870119299,-1.309788907,-1.487429083,1.852133369,1.946426853,-1.69738072,1.403764342,1.008715029,-2.698331529,-1.675223671,2.109140945,0.618484044,2.079494856,1.201352438,2.583958876,1.925691658,1.078733911,0.60778817,1.740947263,1.179200736,2.262894324,3.198996552,1.986322403,2.107518908,1.955568928,1.854164198,0.677920055,0.936374204,-1.207325665,0.899961293…
GO Function	GO:0033293	Monocarboxylic acid binding	14	31	3.45069	top	0.00026	afc	STRG0A56FBJ.g12164.t1,STRG0A56FBJ.g12170.t1,STRG0A56FBJ.g12333.t1,STRG0A56FBJ.g12334.t1,STRG0A56FBJ.g14406.t1,STRG0A56FBJ.g16100.t1,STRG0A56FBJ.g16348.t1,STRG0A56FBJ.g16467.t1,STRG0A56FBJ.g16468.t1,STRG0A56FBJ.g3849.t1,STRG0A56FBJ.g6549.t1,STRG0A56FBJ.g7119.t1,STRG0A56FBJ.g7584.t1,STRG0A56FBJ.g8741.t1	g12164.t1,g12170.t1,g12333.t1,g12334.t1,g14406.t1,g16100.t1,g16348.t1,g16467.t1,g16468.t1,g3849.t1,g6549.t1,g7119.t1,g7584.t1,g8741.t1	g12164.t1,g12170.t1,g12333.t1,g12334.t1,g14406.t1,g16100.t1,g16348.t1,g16467.t1,g16468.t1,g3849.t1,g6549.t1,g7119.t1,g7584.t1,g8741.t1	-2.975742936,-3.214961242,-1.392196703,-2.238113402,-2.519233849,-2.530509893,-2.679952117,-1.85403163,-2.114422683,-1.834398661,-1.074903502,1.096195232,-0.944778201,-2.160386515
GO Function	GO:0005543	Phospholipid binding	44	280	1.77039	top	0.0003	ks	STRG0A56FBJ.g1054.t1,STRG0A56FBJ.g1054.t2,STRG0A56FBJ.g10924.t1,STRG0A56FBJ.g10978.t1,STRG0A56FBJ.g11050.t1,STRG0A56FBJ.g11051.t1,STRG0A56FBJ.g111.t1,STRG0A56FBJ.g1184.t1,STRG0A56FBJ.g11889.t1,STRG0A56FBJ.g11927.t1,STRG0A56FBJ.g12515.t1,STRG0A56FBJ.g12918.t1,STRG0A56FBJ.g12926.t1,STRG0A56FBJ.g14240.t1,STRG0A56FBJ.g14255.t1,STRG0A56FBJ.g14281.t1,STRG0A56FBJ.g14283.t1,STRG0A56FBJ.g15310.t1,STRG0A56…	g1054.t1,g1054.t2,g10924.t1,g10978.t1,g11050.t1,g11051.t1,g111.t1,g1184.t1,g11889.t1,g11927.t1,g12515.t1,g12918.t1,g12926.t1,g14240.t1,g14255.t1,g14281.t1,g14283.t1,g15310.t1,g15450.t1,g16348.t1,g16980.t1,g16987.t1,g287.t1,g2960.t1,g4117.t1,g4396.t1,g5430.t1,g5749.t1,g5804.t1,g6005.t1,g6139.t1,g6826.t1,g685.t1,g7040.t1,g7581.t1,g7584.t1,g7869.t1,g7870.t1,g8273.t1,g8558.t1,g8605.t1,g8661.t1,g8716.…	g1054.t1,g1054.t2,g10924.t1,g10978.t1,g11050.t1,g11051.t1,g111.t1,g1184.t1,g11889.t1,g11927.t1,g12515.t1,g12918.t1,g12926.t1,g14240.t1,g14255.t1,g14281.t1,g14283.t1,g15310.t1,g15450.t1,g16348.t1,g16980.t1,g16987.t1,g287.t1,g2960.t1,g4117.t1,g4396.t1,g5430.t1,g5749.t1,g5804.t1,g6005.t1,g6139.t1,g6826.t1,g685.t1,g7040.t1,g7581.t1,g7584.t1,g7869.t1,g7870.t1,g8273.t1,g8558.t1,g8605.t1,g8661.t1,g8716.…	-1.614412262,-2.291080842,-1.822056587,-1.79462914,-1.854393798,-1.754072964,-0.534656023,-0.558880673,-1.688348551,-1.544457976,-1.070251877,0.794797533,-2.207566853,-1.430806923,-0.775988852,-1.434318152,-0.733600441,-1.799782587,-0.962450803,-2.679952117,-0.487088476,0.805131967,-1.212351065,0.449527154,-3.421199743,-0.660187549,-1.484823732,-0.799052312,1.039496532,-1.406517986,-0.609472371,-…
GO Function	GO:0140101	Catalytic activity, acting on a tRNA	25	124	2.99635	bottom	0.00034	ks	STRG0A56FBJ.g11200.t1,STRG0A56FBJ.g11999.t1,STRG0A56FBJ.g1226.t1,STRG0A56FBJ.g12816.t1,STRG0A56FBJ.g13148.t1,STRG0A56FBJ.g13718.t1,STRG0A56FBJ.g14243.t1,STRG0A56FBJ.g14300.t1,STRG0A56FBJ.g14888.t1,STRG0A56FBJ.g15309.t1,STRG0A56FBJ.g15326.t1,STRG0A56FBJ.g15397.t1,STRG0A56FBJ.g15871.t1,STRG0A56FBJ.g1837.t1,STRG0A56FBJ.g2692.t1,STRG0A56FBJ.g3125.t1,STRG0A56FBJ.g3726.t1,STRG0A56FBJ.g4169.t1,STRG0A56F…	g11200.t1,g11999.t1,g1226.t1,g12816.t1,g13148.t1,g13718.t1,g14243.t1,g14300.t1,g14888.t1,g15309.t1,g15326.t1,g15397.t1,g15871.t1,g1837.t1,g2692.t1,g3125.t1,g3726.t1,g4169.t1,g4179.t1,g4314.t1,g4814.t1,g5009.t1,g5654.t1,g6534.t1,g8083.t1	g11200.t1,g11999.t1,g1226.t1,g12816.t1,g13148.t1,g13718.t1,g14243.t1,g14300.t1,g14888.t1,g15309.t1,g15326.t1,g15397.t1,g15871.t1,g1837.t1,g2692.t1,g3125.t1,g3726.t1,g4169.t1,g4179.t1,g4314.t1,g4814.t1,g5009.t1,g5654.t1,g6534.t1,g8083.t1	0.787680476,0.877772701,0.906831892,1.567087336,0.812650421,0.949910569,1.524443724,1.023585677,1.60276862,0.83213681,0.839474537,0.857327905,-1.389163794,1.119870399,1.439758596,2.154903887,0.706896934,0.670097367,1.009281909,1.278523882,1.021450341,0.639498977,0.822087679,0.819937584,0.808543903
GO Function	GO:0022804	Active transmembrane transporter activity	27	443	2.53829	top	0.00039	ks	STRG0A56FBJ.g10239.t1,STRG0A56FBJ.g11286.t1,STRG0A56FBJ.g11860.t1,STRG0A56FBJ.g11909.t1,STRG0A56FBJ.g12327.t1,STRG0A56FBJ.g12686.t1,STRG0A56FBJ.g12776.t1,STRG0A56FBJ.g12948.t1,STRG0A56FBJ.g14231.t1,STRG0A56FBJ.g14677.t1,STRG0A56FBJ.g15887.t1,STRG0A56FBJ.g16329.t1,STRG0A56FBJ.g2322.t1,STRG0A56FBJ.g2416.t1,STRG0A56FBJ.g2634.t1,STRG0A56FBJ.g2682.t1,STRG0A56FBJ.g4106.t1,STRG0A56FBJ.g4312.t1,STRG0A56F…	g10239.t1,g11286.t1,g11860.t1,g11909.t1,g12327.t1,g12686.t1,g12776.t1,g12948.t1,g14231.t1,g14677.t1,g15887.t1,g16329.t1,g2322.t1,g2416.t1,g2634.t1,g2682.t1,g4106.t1,g4312.t1,g4330.t1,g5512.t1,g6981.t1,g7313.t1,g7928.t1,g8581.t1,g8582.t1,g8589.t1,g9214.t1	g10239.t1,g11286.t1,g11860.t1,g11909.t1,g12327.t1,g12686.t1,g12776.t1,g12948.t1,g14231.t1,g14677.t1,g15887.t1,g16329.t1,g2322.t1,g2416.t1,g2634.t1,g2682.t1,g4106.t1,g4312.t1,g4330.t1,g5512.t1,g6981.t1,g7313.t1,g7928.t1,g8581.t1,g8582.t1,g8589.t1,g9214.t1	-1.287233032,-0.733803761,-1.582309072,-3.137446324,-1.734820699,-1.487429083,-0.776943094,-1.69738072,-1.675223671,-1.55881541,-1.234696136,-1.50761623,-0.713477866,-0.947345955,-2.572433884,-1.187949239,-1.182175472,-0.867757972,-1.321481163,0.892682915,-3.170356601,-2.603965705,-0.639183153,-1.494998081,-2.060899209,-1.203226864,-1.014478367
GO Function	GO:0004111	Creatine kinase activity	3	6	7.11383	top	0.0004	afc	STRG0A56FBJ.g16131.t1,STRG0A56FBJ.g3059.t1,STRG0A56FBJ.g4427.t1	g16131.t1,g3059.t1,g4427.t1	g16131.t1,g3059.t1,g4427.t1	-2.506592586,-3.516680651,-5.20475451
GO Function	GO:0042393	Histone binding	25	145	4.16254	bottom	0.0004	ks	STRG0A56FBJ.g11369.t1,STRG0A56FBJ.g12575.t1,STRG0A56FBJ.g13480.t1,STRG0A56FBJ.g14053.t1,STRG0A56FBJ.g1775.t1,STRG0A56FBJ.g2775.t1,STRG0A56FBJ.g5489.t1,STRG0A56FBJ.g6024.t1,STRG0A56FBJ.g6086.t1,STRG0A56FBJ.g6106.t1,STRG0A56FBJ.g6221.t1,STRG0A56FBJ.g6253.t1,STRG0A56FBJ.g6607.t1,STRG0A56FBJ.g6719.t1,STRG0A56FBJ.g7265.t1,STRG0A56FBJ.g7329.t1,STRG0A56FBJ.g7330.t1,STRG0A56FBJ.g7531.t1,STRG0A56FBJ.g7975…	g11369.t1,g12575.t1,g13480.t1,g14053.t1,g1775.t1,g2775.t1,g5489.t1,g6024.t1,g6086.t1,g6106.t1,g6221.t1,g6253.t1,g6607.t1,g6719.t1,g7265.t1,g7329.t1,g7330.t1,g7531.t1,g7975.t1,g8245.t1,g8283.t1,g8433.t1,g8750.t1,g8924.t1,g992.t1	g11369.t1,g12575.t1,g13480.t1,g14053.t1,g1775.t1,g2775.t1,g5489.t1,g6024.t1,g6086.t1,g6106.t1,g6221.t1,g6253.t1,g6607.t1,g6719.t1,g7265.t1,g7329.t1,g7330.t1,g7531.t1,g7975.t1,g8245.t1,g8283.t1,g8433.t1,g8750.t1,g8924.t1,g992.t1	1.07180322,2.645434198,1.083975433,1.403403191,-1.652727769,2.311159974,2.66807874,1.071841893,0.609275931,1.446756196,2.150819301,0.931467824,0.681889209,0.913792047,1.782588867,0.902718165,1.42931143,1.998676726,1.106107598,2.96905522,0.814753642,1.839087915,1.047256745,1.051253324,1.991254838
GO Function	GO:0045505	Dynein intermediate chain binding	18	43	2.87568	top	0.00058	afc	STRG0A56FBJ.g10314.t1,STRG0A56FBJ.g10858.t1,STRG0A56FBJ.g13835.t1,STRG0A56FBJ.g14485.t1,STRG0A56FBJ.g14798.t1,STRG0A56FBJ.g15558.t1,STRG0A56FBJ.g16269.t1,STRG0A56FBJ.g16271.t1,STRG0A56FBJ.g16848.t1,STRG0A56FBJ.g2172.t1,STRG0A56FBJ.g2681.t1,STRG0A56FBJ.g4415.t1,STRG0A56FBJ.g5078.t1,STRG0A56FBJ.g6276.t1,STRG0A56FBJ.g6698.t1,STRG0A56FBJ.g6884.t1,STRG0A56FBJ.g8131.t1,STRG0A56FBJ.g8302.t1	g10314.t1,g10858.t1,g13835.t1,g14485.t1,g14798.t1,g15558.t1,g16269.t1,g16271.t1,g16848.t1,g2172.t1,g2681.t1,g4415.t1,g5078.t1,g6276.t1,g6698.t1,g6884.t1,g8131.t1,g8302.t1	g10314.t1,g10858.t1,g13835.t1,g14485.t1,g14798.t1,g15558.t1,g16269.t1,g16271.t1,g16848.t1,g2172.t1,g2681.t1,g4415.t1,g5078.t1,g6276.t1,g6698.t1,g6884.t1,g8131.t1,g8302.t1	-0.611404417,-1.841552909,-1.634305602,-1.936317347,-1.617911107,-1.426171263,-1.230435672,-1.205374495,-1.855338098,-2.161468004,-1.8568849,-0.784995087,-0.861430248,-2.594262392,-1.771108942,-1.273906812,-2.441421265,-1.640206758
GO Function	GO:0140662	ATP-dependent protein folding chaperone	17	24	4.01177	bottom	0.00058	afc	STRG0A56FBJ.g13120.t1,STRG0A56FBJ.g14265.t1,STRG0A56FBJ.g14370.t1,STRG0A56FBJ.g14397.t1,STRG0A56FBJ.g14847.t1,STRG0A56FBJ.g15717.t1,STRG0A56FBJ.g16510.t1,STRG0A56FBJ.g16536.t1,STRG0A56FBJ.g16625.t1,STRG0A56FBJ.g16626.t1,STRG0A56FBJ.g16879.t1,STRG0A56FBJ.g3841.t1,STRG0A56FBJ.g4295.t1,STRG0A56FBJ.g5596.t1,STRG0A56FBJ.g6977.t1,STRG0A56FBJ.g7924.t1,STRG0A56FBJ.g8956.t1	g13120.t1,g14265.t1,g14370.t1,g14397.t1,g14847.t1,g15717.t1,g16510.t1,g16536.t1,g16625.t1,g16626.t1,g16879.t1,g3841.t1,g4295.t1,g5596.t1,g6977.t1,g7924.t1,g8956.t1	g13120.t1,g14265.t1,g14370.t1,g14397.t1,g14847.t1,g15717.t1,g16510.t1,g16536.t1,g16625.t1,g16626.t1,g16879.t1,g3841.t1,g4295.t1,g5596.t1,g6977.t1,g7924.t1,g8956.t1	1.388589858,2.109140945,0.618484044,0.921343217,2.079494856,1.925691658,2.262894324,1.986322403,2.107518908,1.955568928,0.770973841,0.490170788,0.787329876,1.181251645,-1.060956336,0.866895209,1.979612739
GO Function	GO:0005319	Lipid transporter activity	19	110	2.8227	top	0.00072	afc	STRG0A56FBJ.g10978.t1,STRG0A56FBJ.g12080.t1,STRG0A56FBJ.g12096.t1,STRG0A56FBJ.g12327.t1,STRG0A56FBJ.g12333.t1,STRG0A56FBJ.g12334.t1,STRG0A56FBJ.g12948.t1,STRG0A56FBJ.g13232.t1,STRG0A56FBJ.g1479.t1,STRG0A56FBJ.g15562.t1,STRG0A56FBJ.g16251.t1,STRG0A56FBJ.g4117.t1,STRG0A56FBJ.g4330.t1,STRG0A56FBJ.g7188.t1,STRG0A56FBJ.g7870.t1,STRG0A56FBJ.g8558.t1,STRG0A56FBJ.g8581.t1,STRG0A56FBJ.g8582.t1,STRG0A56FBJ…	g10978.t1,g12080.t1,g12096.t1,g12327.t1,g12333.t1,g12334.t1,g12948.t1,g13232.t1,g1479.t1,g15562.t1,g16251.t1,g4117.t1,g4330.t1,g7188.t1,g7870.t1,g8558.t1,g8581.t1,g8582.t1,g8589.t1	g10978.t1,g12080.t1,g12096.t1,g12327.t1,g12333.t1,g12334.t1,g12948.t1,g13232.t1,g1479.t1,g15562.t1,g16251.t1,g4117.t1,g4330.t1,g7188.t1,g7870.t1,g8558.t1,g8581.t1,g8582.t1,g8589.t1	-1.79462914,-1.983173447,-1.143696305,-1.734820699,-1.392196703,-2.238113402,-1.69738072,-1.600701384,-2.520916647,-0.673759346,-1.956691115,-3.421199743,-1.321481163,-1.724264224,0.784003957,-0.649660702,-1.494998081,-2.060899209,-1.203226864
GO Function	GO:0004386	Helicase activity	30	139	3.64214	bottom	0.00091	ks	STRG0A56FBJ.g10039.t1,STRG0A56FBJ.g10878.t1,STRG0A56FBJ.g11148.t1,STRG0A56FBJ.g12904.t1,STRG0A56FBJ.g12939.t1,STRG0A56FBJ.g12972.t1,STRG0A56FBJ.g13127.t1,STRG0A56FBJ.g15062.t1,STRG0A56FBJ.g15498.t1,STRG0A56FBJ.g15915.t1,STRG0A56FBJ.g16515.t1,STRG0A56FBJ.g16703.t1,STRG0A56FBJ.g16882.t1,STRG0A56FBJ.g1838.t1,STRG0A56FBJ.g2410.t1,STRG0A56FBJ.g4610.t1,STRG0A56FBJ.g4950.t1,STRG0A56FBJ.g5003.t1,STRG0A56…	g10039.t1,g10878.t1,g11148.t1,g12904.t1,g12939.t1,g12972.t1,g13127.t1,g15062.t1,g15498.t1,g15915.t1,g16515.t1,g16703.t1,g16882.t1,g1838.t1,g2410.t1,g4610.t1,g4950.t1,g5003.t1,g5013.t1,g5250.t1,g6147.t1,g6652.t1,g7006.t1,g7320.t1,g7703.t1,g8189.t1,g8245.t1,g8648.t1,g8752.t1,g9954.t1	g10039.t1,g10878.t1,g11148.t1,g12904.t1,g12939.t1,g12972.t1,g13127.t1,g15062.t1,g15498.t1,g15915.t1,g16515.t1,g16703.t1,g16882.t1,g1838.t1,g2410.t1,g4610.t1,g4950.t1,g5003.t1,g5013.t1,g5250.t1,g6147.t1,g6652.t1,g7006.t1,g7320.t1,g7703.t1,g8189.t1,g8245.t1,g8648.t1,g8752.t1,g9954.t1	1.010755651,1.209600662,1.284905058,1.154561674,1.946426853,0.728851337,1.027408517,1.201352438,2.583958876,0.60778817,3.198996552,1.854164198,0.899961293,0.809721044,1.499167066,-2.340847857,1.182797934,2.572178959,1.809277871,0.938036259,-1.066926708,1.07669455,2.348747702,1.049031779,1.430248271,0.687377784,2.96905522,-1.567835685,1.917028959,1.428258634
GO Function	GO:0030515	snoRNA binding	7	26	5.63318	bottom	0.00094	afc	STRG0A56FBJ.g10880.t1,STRG0A56FBJ.g14652.t1,STRG0A56FBJ.g16316.t1,STRG0A56FBJ.g1838.t1,STRG0A56FBJ.g2460.t1,STRG0A56FBJ.g4607.t1,STRG0A56FBJ.g5301.t1	g10880.t1,g14652.t1,g16316.t1,g1838.t1,g2460.t1,g4607.t1,g5301.t1	g10880.t1,g14652.t1,g16316.t1,g1838.t1,g2460.t1,g4607.t1,g5301.t1	1.330053662,1.640171576,2.711360689,0.809721044,2.272310124,2.300372381,2.271744918
GO Function	GO:0005504	Fatty acid binding	12	21	3.47577	top	0.00097	afc	STRG0A56FBJ.g12164.t1,STRG0A56FBJ.g12170.t1,STRG0A56FBJ.g12333.t1,STRG0A56FBJ.g12334.t1,STRG0A56FBJ.g14406.t1,STRG0A56FBJ.g16100.t1,STRG0A56FBJ.g16467.t1,STRG0A56FBJ.g16468.t1,STRG0A56FBJ.g3849.t1,STRG0A56FBJ.g6549.t1,STRG0A56FBJ.g7119.t1,STRG0A56FBJ.g8741.t1	g12164.t1,g12170.t1,g12333.t1,g12334.t1,g14406.t1,g16100.t1,g16467.t1,g16468.t1,g3849.t1,g6549.t1,g7119.t1,g8741.t1	g12164.t1,g12170.t1,g12333.t1,g12334.t1,g14406.t1,g16100.t1,g16467.t1,g16468.t1,g3849.t1,g6549.t1,g7119.t1,g8741.t1	-2.975742936,-3.214961242,-1.392196703,-2.238113402,-2.519233849,-2.530509893,-1.85403163,-2.114422683,-1.834398661,-1.074903502,1.096195232,-2.160386515
GO Function	GO:0008569	Minus-end-directed microtubule motor activity	14	28	3.08343	top	0.0014	afc	STRG0A56FBJ.g10314.t1,STRG0A56FBJ.g10858.t1,STRG0A56FBJ.g13835.t1,STRG0A56FBJ.g14485.t1,STRG0A56FBJ.g15558.t1,STRG0A56FBJ.g16848.t1,STRG0A56FBJ.g2172.t1,STRG0A56FBJ.g2681.t1,STRG0A56FBJ.g4415.t1,STRG0A56FBJ.g6276.t1,STRG0A56FBJ.g6698.t1,STRG0A56FBJ.g6884.t1,STRG0A56FBJ.g8131.t1,STRG0A56FBJ.g8302.t1	g10314.t1,g10858.t1,g13835.t1,g14485.t1,g15558.t1,g16848.t1,g2172.t1,g2681.t1,g4415.t1,g6276.t1,g6698.t1,g6884.t1,g8131.t1,g8302.t1	g10314.t1,g10858.t1,g13835.t1,g14485.t1,g15558.t1,g16848.t1,g2172.t1,g2681.t1,g4415.t1,g6276.t1,g6698.t1,g6884.t1,g8131.t1,g8302.t1	-0.611404417,-1.841552909,-1.634305602,-1.936317347,-1.426171263,-1.855338098,-2.161468004,-1.8568849,-0.784995087,-2.594262392,-1.771108942,-1.273906812,-2.441421265,-1.640206758
GO Function	GO:0016614	Oxidoreductase activity, acting on CH-OH group of donors	51	173	1.55811	top	0.0019	ks	STRG0A56FBJ.g10690.t1,STRG0A56FBJ.g10703.t1,STRG0A56FBJ.g10839.t1,STRG0A56FBJ.g10975.t1,STRG0A56FBJ.g11541.t1,STRG0A56FBJ.g11543.t1,STRG0A56FBJ.g11633.t1,STRG0A56FBJ.g11658.t1,STRG0A56FBJ.g1225.t1,STRG0A56FBJ.g12818.t1,STRG0A56FBJ.g13250.t1,STRG0A56FBJ.g13451.t1,STRG0A56FBJ.g14349.t1,STRG0A56FBJ.g14365.t1,STRG0A56FBJ.g14462.t1,STRG0A56FBJ.g14474.t1,STRG0A56FBJ.g14475.t1,STRG0A56FBJ.g14877.t1,STRG…	g10690.t1,g10703.t1,g10839.t1,g10975.t1,g11541.t1,g11543.t1,g11633.t1,g11658.t1,g1225.t1,g12818.t1,g13250.t1,g13451.t1,g14349.t1,g14365.t1,g14462.t1,g14474.t1,g14475.t1,g14877.t1,g1495.t1,g1496.t1,g1500.t1,g15492.t1,g15579.t1,g16001.t1,g16440.t1,g16441.t1,g16749.t1,g1706.t1,g1817.t1,g1994.t1,g2729.t1,g2869.t1,g3052.t1,g3906.t1,g4842.t1,g5169.t1,g5518.t1,g5706.t1,g5820.t1,g6033.t1,g6037.t1,g6038.t…	g10690.t1,g10703.t1,g10839.t1,g10975.t1,g11541.t1,g11543.t1,g11633.t1,g11658.t1,g1225.t1,g12818.t1,g13250.t1,g13451.t1,g14349.t1,g14365.t1,g14462.t1,g14474.t1,g14475.t1,g14877.t1,g1495.t1,g1496.t1,g1500.t1,g15492.t1,g15579.t1,g16001.t1,g16440.t1,g16441.t1,g16749.t1,g1706.t1,g1817.t1,g1994.t1,g2729.t1,g2869.t1,g3052.t1,g3906.t1,g4842.t1,g5169.t1,g5518.t1,g5706.t1,g5820.t1,g6033.t1,g6037.t1,g6038.t…	-1.012187087,-1.622559879,0.588116581,-0.755805256,-2.409930835,-2.283875353,-1.647450966,0.708569642,-1.363826186,-0.781367483,1.420357293,0.561786194,-1.53348795,0.592831433,-1.612924617,-2.242063833,-1.835245504,-0.921317605,-2.768579105,-2.318726146,1.106959711,-1.797837805,1.161196797,-1.538458753,-2.253090461,-1.936063544,-0.745289586,-1.086095874,-1.622564261,-3.347058903,-1.078323608,0.88…
GO Function	GO:0022857	Transmembrane transporter activity	41	1071	1.90928	top	0.0021	ks	STRG0A56FBJ.g10239.t1,STRG0A56FBJ.g11286.t1,STRG0A56FBJ.g11860.t1,STRG0A56FBJ.g11909.t1,STRG0A56FBJ.g12327.t1,STRG0A56FBJ.g12686.t1,STRG0A56FBJ.g12776.t1,STRG0A56FBJ.g12948.t1,STRG0A56FBJ.g13232.t1,STRG0A56FBJ.g13420.t1,STRG0A56FBJ.g14231.t1,STRG0A56FBJ.g14677.t1,STRG0A56FBJ.g15487.t1,STRG0A56FBJ.g15887.t1,STRG0A56FBJ.g16329.t1,STRG0A56FBJ.g16791.t1,STRG0A56FBJ.g1742.t1,STRG0A56FBJ.g2013.t1,STRG0…	g10239.t1,g11286.t1,g11860.t1,g11909.t1,g12327.t1,g12686.t1,g12776.t1,g12948.t1,g13232.t1,g13420.t1,g14231.t1,g14677.t1,g15487.t1,g15887.t1,g16329.t1,g16791.t1,g1742.t1,g2013.t1,g2322.t1,g2416.t1,g2634.t1,g2682.t1,g2962.t1,g3308.t1,g4106.t1,g4312.t1,g4330.t1,g4417.t1,g5512.t1,g6061.t1,g6981.t1,g7313.t1,g7642.t1,g7928.t1,g8317.t1,g8581.t1,g8582.t1,g8589.t1,g9214.t1,g9251.t1,g9313.t1	g10239.t1,g11286.t1,g11860.t1,g11909.t1,g12327.t1,g12686.t1,g12776.t1,g12948.t1,g13232.t1,g13420.t1,g14231.t1,g14677.t1,g15487.t1,g15887.t1,g16329.t1,g16791.t1,g1742.t1,g2013.t1,g2322.t1,g2416.t1,g2634.t1,g2682.t1,g2962.t1,g3308.t1,g4106.t1,g4312.t1,g4330.t1,g4417.t1,g5512.t1,g6061.t1,g6981.t1,g7313.t1,g7642.t1,g7928.t1,g8317.t1,g8581.t1,g8582.t1,g8589.t1,g9214.t1,g9251.t1,g9313.t1	-1.287233032,-0.733803761,-1.582309072,-3.137446324,-1.734820699,-1.487429083,-0.776943094,-1.69738072,-1.600701384,-0.585097553,-1.675223671,-1.55881541,-2.744545311,-1.234696136,-1.50761623,-0.742556223,-1.637874353,1.368429666,-0.713477866,-0.947345955,-2.572433884,-1.187949239,-2.147871691,-1.356553933,-1.182175472,-0.867757972,-1.321481163,1.116722362,0.892682915,1.029515151,-3.170356601,-2.…
GO Function	GO:0020037	Heme binding	19	170	2.64778	top	0.0022	afc	STRG0A56FBJ.g11375.t1,STRG0A56FBJ.g11588.t1,STRG0A56FBJ.g11601.t1,STRG0A56FBJ.g11691.t1,STRG0A56FBJ.g11810.t1,STRG0A56FBJ.g12896.t1,STRG0A56FBJ.g12898.t1,STRG0A56FBJ.g13895.t1,STRG0A56FBJ.g15487.t1,STRG0A56FBJ.g1630.t1,STRG0A56FBJ.g16652.t1,STRG0A56FBJ.g2252.t1,STRG0A56FBJ.g2628.t1,STRG0A56FBJ.g3345.t1,STRG0A56FBJ.g3856.t1,STRG0A56FBJ.g4673.t1,STRG0A56FBJ.g5898.t1,STRG0A56FBJ.g8467.t1,STRG0A56FBJ…	g11375.t1,g11588.t1,g11601.t1,g11691.t1,g11810.t1,g12896.t1,g12898.t1,g13895.t1,g15487.t1,g1630.t1,g16652.t1,g2252.t1,g2628.t1,g3345.t1,g3856.t1,g4673.t1,g5898.t1,g8467.t1,g9650.t1	g11375.t1,g11588.t1,g11601.t1,g11691.t1,g11810.t1,g12896.t1,g12898.t1,g13895.t1,g15487.t1,g1630.t1,g16652.t1,g2252.t1,g2628.t1,g3345.t1,g3856.t1,g4673.t1,g5898.t1,g8467.t1,g9650.t1	0.900825465,-1.674451582,-1.976102221,-0.960384032,-0.963016342,-2.347295095,-1.468283716,-1.071789555,-2.744545311,-1.143720854,-1.196381595,-1.361037985,-1.623014387,-2.377941142,-1.475253512,-1.619078992,-0.644934393,-2.450210659,-1.949912998
GO Function	GO:0003779	Actin binding	44	306	1.29788	top	0.0024	ks	STRG0A56FBJ.g10320.t1,STRG0A56FBJ.g11147.t1,STRG0A56FBJ.g11675.t1,STRG0A56FBJ.g11714.t1,STRG0A56FBJ.g12475.t1,STRG0A56FBJ.g12513.t1,STRG0A56FBJ.g12792.t1,STRG0A56FBJ.g13046.t1,STRG0A56FBJ.g13390.t1,STRG0A56FBJ.g13698.t1,STRG0A56FBJ.g14255.t1,STRG0A56FBJ.g15082.t1,STRG0A56FBJ.g15308.t1,STRG0A56FBJ.g15386.t1,STRG0A56FBJ.g15776.t1,STRG0A56FBJ.g15777.t1,STRG0A56FBJ.g15778.t1,STRG0A56FBJ.g16191.t1,STR…	g10320.t1,g11147.t1,g11675.t1,g11714.t1,g12475.t1,g12513.t1,g12792.t1,g13046.t1,g13390.t1,g13698.t1,g14255.t1,g15082.t1,g15308.t1,g15386.t1,g15776.t1,g15777.t1,g15778.t1,g16191.t1,g16388.t1,g17000.t1,g17017.t1,g1970.t1,g2150.t1,g2150.t2,g2923.t1,g2947.t1,g3280.t1,g3399.t1,g3438.t1,g3508.t1,g4454.t1,g4992.t1,g5028.t1,g5212.t1,g5930.t1,g6064.t1,g6486.t1,g6547.t1,g6630.t1,g6799.t1,g685.t1,g7413.t1,g…	g10320.t1,g11147.t1,g11675.t1,g11714.t1,g12475.t1,g12513.t1,g12792.t1,g13046.t1,g13390.t1,g13698.t1,g14255.t1,g15082.t1,g15308.t1,g15386.t1,g15776.t1,g15777.t1,g15778.t1,g16191.t1,g16388.t1,g17000.t1,g17017.t1,g1970.t1,g2150.t1,g2150.t2,g2923.t1,g2947.t1,g3280.t1,g3399.t1,g3438.t1,g3508.t1,g4454.t1,g4992.t1,g5028.t1,g5212.t1,g5930.t1,g6064.t1,g6486.t1,g6547.t1,g6630.t1,g6799.t1,g685.t1,g7413.t1,g…	-1.70176532,-0.975709064,-0.941109181,0.689803233,0.718685466,0.728606639,-1.140978863,-1.012870911,-0.56891928,-1.830988909,-0.775988852,-0.883712077,-1.000636617,0.919143652,-1.472710602,-0.499906811,-0.570766721,-0.665574761,0.503452598,0.98270224,-1.171609195,-1.816120671,-1.373596148,-2.943969574,-1.235571717,-0.692727042,-2.240452787,-1.075779746,-0.565693193,-1.645874695,-0.709428932,-1.69…
GO Function	GO:0140097	Catalytic activity, acting on DNA	26	193	4.12405	bottom	0.0024	ks	STRG0A56FBJ.g11146.t1,STRG0A56FBJ.g12904.t1,STRG0A56FBJ.g12939.t1,STRG0A56FBJ.g13564.t1,STRG0A56FBJ.g14405.t1,STRG0A56FBJ.g15498.t1,STRG0A56FBJ.g16515.t1,STRG0A56FBJ.g16703.t1,STRG0A56FBJ.g16882.t1,STRG0A56FBJ.g1838.t1,STRG0A56FBJ.g2520.t1,STRG0A56FBJ.g3587.t1,STRG0A56FBJ.g4896.t1,STRG0A56FBJ.g5003.t1,STRG0A56FBJ.g5013.t1,STRG0A56FBJ.g5301.t1,STRG0A56FBJ.g545.t1,STRG0A56FBJ.g599.t1,STRG0A56FBJ.g6…	g11146.t1,g12904.t1,g12939.t1,g13564.t1,g14405.t1,g15498.t1,g16515.t1,g16703.t1,g16882.t1,g1838.t1,g2520.t1,g3587.t1,g4896.t1,g5003.t1,g5013.t1,g5301.t1,g545.t1,g599.t1,g6159.t1,g6652.t1,g6776.t1,g7006.t1,g7055.t1,g8189.t1,g8245.t1,g8648.t1	g11146.t1,g12904.t1,g12939.t1,g13564.t1,g14405.t1,g15498.t1,g16515.t1,g16703.t1,g16882.t1,g1838.t1,g2520.t1,g3587.t1,g4896.t1,g5003.t1,g5013.t1,g5301.t1,g545.t1,g599.t1,g6159.t1,g6652.t1,g6776.t1,g7006.t1,g7055.t1,g8189.t1,g8245.t1,g8648.t1	2.8846113,1.154561674,1.946426853,1.623357739,1.002378107,2.583958876,3.198996552,1.854164198,0.899961293,0.809721044,0.996657562,-0.846670521,1.480526783,2.572178959,1.809277871,2.271744918,-1.180299151,0.740816954,1.583158939,1.07669455,1.404644675,2.348747702,0.971634419,0.687377784,2.96905522,-1.567835685
GO Function	GO:0019843	rRNA binding	17	51	3.67706	bottom	0.0029	afc	STRG0A56FBJ.g10880.t1,STRG0A56FBJ.g11663.t1,STRG0A56FBJ.g11763.t1,STRG0A56FBJ.g13272.t1,STRG0A56FBJ.g13273.t1,STRG0A56FBJ.g16821.t1,STRG0A56FBJ.g2329.t1,STRG0A56FBJ.g2348.t1,STRG0A56FBJ.g2961.t1,STRG0A56FBJ.g3296.t1,STRG0A56FBJ.g3593.t1,STRG0A56FBJ.g5658.t1,STRG0A56FBJ.g6457.t1,STRG0A56FBJ.g6801.t1,STRG0A56FBJ.g7332.t1,STRG0A56FBJ.g7553.t1,STRG0A56FBJ.g8754.t1	g10880.t1,g11663.t1,g11763.t1,g13272.t1,g13273.t1,g16821.t1,g2329.t1,g2348.t1,g2961.t1,g3296.t1,g3593.t1,g5658.t1,g6457.t1,g6801.t1,g7332.t1,g7553.t1,g8754.t1	g10880.t1,g11663.t1,g11763.t1,g13272.t1,g13273.t1,g16821.t1,g2329.t1,g2348.t1,g2961.t1,g3296.t1,g3593.t1,g5658.t1,g6457.t1,g6801.t1,g7332.t1,g7553.t1,g8754.t1	1.330053662,0.984807174,0.951959336,1.420638048,1.407417647,1.455485733,1.652642254,1.499907014,0.689976678,2.124746259,1.285102945,1.224197699,2.291794393,1.449898547,-2.552743157,1.423745735,1.666129284
GO Function	GO:0004553	Hydrolase activity, hydrolyzing O-glycosyl compounds	27	97	2.27971	top	0.003	ks	STRG0A56FBJ.g10761.t1,STRG0A56FBJ.g11406.t1,STRG0A56FBJ.g12736.t1,STRG0A56FBJ.g13168.t1,STRG0A56FBJ.g13445.t1,STRG0A56FBJ.g14120.t1,STRG0A56FBJ.g15423.t1,STRG0A56FBJ.g15425.t1,STRG0A56FBJ.g15426.t1,STRG0A56FBJ.g15623.t1,STRG0A56FBJ.g15870.t1,STRG0A56FBJ.g16095.t1,STRG0A56FBJ.g16095.t3,STRG0A56FBJ.g1624.t1,STRG0A56FBJ.g1946.t1,STRG0A56FBJ.g2248.t1,STRG0A56FBJ.g2579.t1,STRG0A56FBJ.g4146.t1,STRG0A56…	g10761.t1,g11406.t1,g12736.t1,g13168.t1,g13445.t1,g14120.t1,g15423.t1,g15425.t1,g15426.t1,g15623.t1,g15870.t1,g16095.t1,g16095.t3,g1624.t1,g1946.t1,g2248.t1,g2579.t1,g4146.t1,g4188.t1,g4310.t1,g4995.t1,g5036.t1,g5102.t1,g5104.t1,g5160.t1,g5610.t1,g979.t1	g10761.t1,g11406.t1,g12736.t1,g13168.t1,g13445.t1,g14120.t1,g15423.t1,g15425.t1,g15426.t1,g15623.t1,g15870.t1,g16095.t1,g16095.t3,g1624.t1,g1946.t1,g2248.t1,g2579.t1,g4146.t1,g4188.t1,g4310.t1,g4995.t1,g5036.t1,g5102.t1,g5104.t1,g5160.t1,g5610.t1,g979.t1	-1.820266793,-1.30077953,0.616468819,-1.167712946,-1.839973787,-1.924713712,-1.633096863,-1.903542993,-1.568261966,-1.638837087,-1.818547769,-1.393923504,-0.65657216,-1.237093936,-0.530207056,-1.221441881,0.703240171,0.888913595,-0.749545717,-2.442105246,-0.745263557,-1.355370145,-1.726171335,-1.608656019,-2.790191131,-2.5627327,-1.540673137
GO Function	GO:0003730	mRNA 3-UTR binding	15	48	3.83988	bottom	0.0031	afc	STRG0A56FBJ.g11953.t1,STRG0A56FBJ.g12573.t1,STRG0A56FBJ.g12731.t1,STRG0A56FBJ.g14265.t1,STRG0A56FBJ.g1464.t1,STRG0A56FBJ.g15090.t1,STRG0A56FBJ.g15227.t1,STRG0A56FBJ.g15608.t1,STRG0A56FBJ.g16037.t1,STRG0A56FBJ.g2676.t1,STRG0A56FBJ.g3830.t1,STRG0A56FBJ.g4474.t1,STRG0A56FBJ.g5088.t1,STRG0A56FBJ.g8151.t1,STRG0A56FBJ.g8501.t1	g11953.t1,g12573.t1,g12731.t1,g14265.t1,g1464.t1,g15090.t1,g15227.t1,g15608.t1,g16037.t1,g2676.t1,g3830.t1,g4474.t1,g5088.t1,g8151.t1,g8501.t1	g11953.t1,g12573.t1,g12731.t1,g14265.t1,g1464.t1,g15090.t1,g15227.t1,g15608.t1,g16037.t1,g2676.t1,g3830.t1,g4474.t1,g5088.t1,g8151.t1,g8501.t1	1.345128774,1.499703474,1.924057709,2.109140945,1.277212664,-0.719726623,1.825505464,0.589338969,0.617361382,0.756835272,1.178909648,1.195513045,1.659652199,2.034655471,1.50886069
GO Function	GO:0016616	Oxidoreductase activity, acting on the CH-OH group of donors, NAD or NADP as acceptor	49	149	1.54602	top	0.0031	ks	STRG0A56FBJ.g10690.t1,STRG0A56FBJ.g10703.t1,STRG0A56FBJ.g10839.t1,STRG0A56FBJ.g10975.t1,STRG0A56FBJ.g11541.t1,STRG0A56FBJ.g11543.t1,STRG0A56FBJ.g11633.t1,STRG0A56FBJ.g11658.t1,STRG0A56FBJ.g1225.t1,STRG0A56FBJ.g12818.t1,STRG0A56FBJ.g13250.t1,STRG0A56FBJ.g13451.t1,STRG0A56FBJ.g14349.t1,STRG0A56FBJ.g14365.t1,STRG0A56FBJ.g14462.t1,STRG0A56FBJ.g14474.t1,STRG0A56FBJ.g14475.t1,STRG0A56FBJ.g1495.t1,STRG0…	g10690.t1,g10703.t1,g10839.t1,g10975.t1,g11541.t1,g11543.t1,g11633.t1,g11658.t1,g1225.t1,g12818.t1,g13250.t1,g13451.t1,g14349.t1,g14365.t1,g14462.t1,g14474.t1,g14475.t1,g1495.t1,g1496.t1,g1500.t1,g15492.t1,g15579.t1,g16001.t1,g16440.t1,g16441.t1,g16749.t1,g1706.t1,g1817.t1,g1994.t1,g2729.t1,g2869.t1,g3052.t1,g3906.t1,g4842.t1,g5169.t1,g5518.t1,g5706.t1,g5820.t1,g6033.t1,g6037.t1,g6038.t1,g6069.t1…	g10690.t1,g10703.t1,g10839.t1,g10975.t1,g11541.t1,g11543.t1,g11633.t1,g11658.t1,g1225.t1,g12818.t1,g13250.t1,g13451.t1,g14349.t1,g14365.t1,g14462.t1,g14474.t1,g14475.t1,g1495.t1,g1496.t1,g1500.t1,g15492.t1,g15579.t1,g16001.t1,g16440.t1,g16441.t1,g16749.t1,g1706.t1,g1817.t1,g1994.t1,g2729.t1,g2869.t1,g3052.t1,g3906.t1,g4842.t1,g5169.t1,g5518.t1,g5706.t1,g5820.t1,g6033.t1,g6037.t1,g6038.t1,g6069.t1…	-1.012187087,-1.622559879,0.588116581,-0.755805256,-2.409930835,-2.283875353,-1.647450966,0.708569642,-1.363826186,-0.781367483,1.420357293,0.561786194,-1.53348795,0.592831433,-1.612924617,-2.242063833,-1.835245504,-2.768579105,-2.318726146,1.106959711,-1.797837805,1.161196797,-1.538458753,-2.253090461,-1.936063544,-0.745289586,-1.086095874,-1.622564261,-3.347058903,-1.078323608,0.882289132,0.674…
GO Function	GO:0016798	Hydrolase activity, acting on glycosyl bonds	29	127	2.24869	top	0.0031	ks	STRG0A56FBJ.g10761.t1,STRG0A56FBJ.g11406.t1,STRG0A56FBJ.g12736.t1,STRG0A56FBJ.g13168.t1,STRG0A56FBJ.g13445.t1,STRG0A56FBJ.g14120.t1,STRG0A56FBJ.g15423.t1,STRG0A56FBJ.g15425.t1,STRG0A56FBJ.g15426.t1,STRG0A56FBJ.g15623.t1,STRG0A56FBJ.g15870.t1,STRG0A56FBJ.g16095.t1,STRG0A56FBJ.g16095.t3,STRG0A56FBJ.g1624.t1,STRG0A56FBJ.g1946.t1,STRG0A56FBJ.g2248.t1,STRG0A56FBJ.g2579.t1,STRG0A56FBJ.g4146.t1,STRG0A56…	g10761.t1,g11406.t1,g12736.t1,g13168.t1,g13445.t1,g14120.t1,g15423.t1,g15425.t1,g15426.t1,g15623.t1,g15870.t1,g16095.t1,g16095.t3,g1624.t1,g1946.t1,g2248.t1,g2579.t1,g4146.t1,g4188.t1,g4310.t1,g4995.t1,g5036.t1,g5102.t1,g5104.t1,g5160.t1,g545.t1,g5610.t1,g5736.t1,g979.t1	g10761.t1,g11406.t1,g12736.t1,g13168.t1,g13445.t1,g14120.t1,g15423.t1,g15425.t1,g15426.t1,g15623.t1,g15870.t1,g16095.t1,g16095.t3,g1624.t1,g1946.t1,g2248.t1,g2579.t1,g4146.t1,g4188.t1,g4310.t1,g4995.t1,g5036.t1,g5102.t1,g5104.t1,g5160.t1,g545.t1,g5610.t1,g5736.t1,g979.t1	-1.820266793,-1.30077953,0.616468819,-1.167712946,-1.839973787,-1.924713712,-1.633096863,-1.903542993,-1.568261966,-1.638837087,-1.818547769,-1.393923504,-0.65657216,-1.237093936,-0.530207056,-1.221441881,0.703240171,0.888913595,-0.749545717,-2.442105246,-0.745263557,-1.355370145,-1.726171335,-1.608656019,-2.790191131,-1.180299151,-2.5627327,-0.954169117,-1.540673137
GO Function	GO:0003712	Transcription coregulator activity	35	238	2.72721	bottom	0.0037	ks	STRG0A56FBJ.g10948.t1,STRG0A56FBJ.g11369.t1,STRG0A56FBJ.g11626.t1,STRG0A56FBJ.g11776.t1,STRG0A56FBJ.g11879.t1,STRG0A56FBJ.g12513.t1,STRG0A56FBJ.g13247.t1,STRG0A56FBJ.g13250.t1,STRG0A56FBJ.g13705.t1,STRG0A56FBJ.g14143.t1,STRG0A56FBJ.g14268.t1,STRG0A56FBJ.g15058.t1,STRG0A56FBJ.g15207.t1,STRG0A56FBJ.g15242.t1,STRG0A56FBJ.g15777.t1,STRG0A56FBJ.g15778.t1,STRG0A56FBJ.g16320.t1,STRG0A56FBJ.g16595.t1,STR…	g10948.t1,g11369.t1,g11626.t1,g11776.t1,g11879.t1,g12513.t1,g13247.t1,g13250.t1,g13705.t1,g14143.t1,g14268.t1,g15058.t1,g15207.t1,g15242.t1,g15777.t1,g15778.t1,g16320.t1,g16595.t1,g16703.t1,g16726.t1,g2489.t1,g2923.t1,g3309.t1,g4246.t1,g4444.t1,g4896.t1,g5200.t1,g5630.t1,g5710.t1,g5836.t1,g7268.t1,g7631.t1,g8011.t1,g8189.t1,g9407.t1	g10948.t1,g11369.t1,g11626.t1,g11776.t1,g11879.t1,g12513.t1,g13247.t1,g13250.t1,g13705.t1,g14143.t1,g14268.t1,g15058.t1,g15207.t1,g15242.t1,g15777.t1,g15778.t1,g16320.t1,g16595.t1,g16703.t1,g16726.t1,g2489.t1,g2923.t1,g3309.t1,g4246.t1,g4444.t1,g4896.t1,g5200.t1,g5630.t1,g5710.t1,g5836.t1,g7268.t1,g7631.t1,g8011.t1,g8189.t1,g9407.t1	1.830854422,1.07180322,1.323694824,1.470531856,0.886978057,0.728606639,-0.962807666,1.420357293,0.797574806,1.249711279,1.171657699,-0.907349351,1.349299699,1.836469269,-0.499906811,-0.570766721,-0.802552371,0.729218637,1.854164198,-0.770916963,1.593126435,-1.235571717,0.769002692,1.224059053,1.148207793,1.480526783,0.700941323,1.675285206,0.750170095,1.000989757,1.517043867,1.693972121,1.3467381…
GO Function	GO:0008235	Metalloexopeptidase activity	23	81	2.82058	top	0.0037	ks	STRG0A56FBJ.g10019.t1,STRG0A56FBJ.g10020.t1,STRG0A56FBJ.g11608.t1,STRG0A56FBJ.g11609.t1,STRG0A56FBJ.g12338.t1,STRG0A56FBJ.g12344.t1,STRG0A56FBJ.g12345.t1,STRG0A56FBJ.g1292.t1,STRG0A56FBJ.g1293.t1,STRG0A56FBJ.g13629.t1,STRG0A56FBJ.g13644.t1,STRG0A56FBJ.g1540.t1,STRG0A56FBJ.g15960.t1,STRG0A56FBJ.g4015.t1,STRG0A56FBJ.g4468.t1,STRG0A56FBJ.g6022.t1,STRG0A56FBJ.g6663.t1,STRG0A56FBJ.g7082.t1,STRG0A56FBJ…	g10019.t1,g10020.t1,g11608.t1,g11609.t1,g12338.t1,g12344.t1,g12345.t1,g1292.t1,g1293.t1,g13629.t1,g13644.t1,g1540.t1,g15960.t1,g4015.t1,g4468.t1,g6022.t1,g6663.t1,g7082.t1,g7460.t1,g7463.t1,g7464.t1,g9203.t1,g9204.t1	g10019.t1,g10020.t1,g11608.t1,g11609.t1,g12338.t1,g12344.t1,g12345.t1,g1292.t1,g1293.t1,g13629.t1,g13644.t1,g1540.t1,g15960.t1,g4015.t1,g4468.t1,g6022.t1,g6663.t1,g7082.t1,g7460.t1,g7463.t1,g7464.t1,g9203.t1,g9204.t1	-2.939099794,-3.976519189,-2.458708054,-1.560342674,-1.893806679,-2.252173554,-1.298621144,-3.111383668,-4.76863538,1.685755738,-0.963325401,0.643513276,-1.278378353,-1.28491108,0.551218892,1.172488622,-1.496839223,-1.129089932,-1.158221176,-1.173539629,-3.126647034,-2.099906736,-2.16823055
GO Function	GO:0008574	Plus-end-directed microtubule motor activity	5	21	4.86372	top	0.0037	afc	STRG0A56FBJ.g13599.t1,STRG0A56FBJ.g5774.t1,STRG0A56FBJ.g6058.t1,STRG0A56FBJ.g8202.t1,STRG0A56FBJ.g8424.t1	g13599.t1,g5774.t1,g6058.t1,g8202.t1,g8424.t1	g13599.t1,g5774.t1,g6058.t1,g8202.t1,g8424.t1	-2.698331529,-3.59167108,-3.289864903,-1.38321964,-2.057423035
GO Function	GO:0015293	Symporter activity	8	244	3.66648	top	0.0037	afc	STRG0A56FBJ.g11860.t1,STRG0A56FBJ.g11909.t1,STRG0A56FBJ.g14677.t1,STRG0A56FBJ.g15887.t1,STRG0A56FBJ.g16329.t1,STRG0A56FBJ.g4106.t1,STRG0A56FBJ.g6981.t1,STRG0A56FBJ.g7313.t1	g11860.t1,g11909.t1,g14677.t1,g15887.t1,g16329.t1,g4106.t1,g6981.t1,g7313.t1	g11860.t1,g11909.t1,g14677.t1,g15887.t1,g16329.t1,g4106.t1,g6981.t1,g7313.t1	-1.582309072,-3.137446324,-1.55881541,-1.234696136,-1.50761623,-1.182175472,-3.170356601,-2.603965705
GO Function	GO:0051015	Actin filament binding	27	158	1.56605	top	0.0037	ks	STRG0A56FBJ.g10320.t1,STRG0A56FBJ.g11147.t1,STRG0A56FBJ.g11675.t1,STRG0A56FBJ.g12792.t1,STRG0A56FBJ.g13046.t1,STRG0A56FBJ.g13698.t1,STRG0A56FBJ.g14255.t1,STRG0A56FBJ.g15308.t1,STRG0A56FBJ.g15776.t1,STRG0A56FBJ.g15777.t1,STRG0A56FBJ.g15778.t1,STRG0A56FBJ.g16191.t1,STRG0A56FBJ.g17000.t1,STRG0A56FBJ.g17017.t1,STRG0A56FBJ.g2923.t1,STRG0A56FBJ.g3399.t1,STRG0A56FBJ.g3438.t1,STRG0A56FBJ.g3508.t1,STRG0A5…	g10320.t1,g11147.t1,g11675.t1,g12792.t1,g13046.t1,g13698.t1,g14255.t1,g15308.t1,g15776.t1,g15777.t1,g15778.t1,g16191.t1,g17000.t1,g17017.t1,g2923.t1,g3399.t1,g3438.t1,g3508.t1,g5028.t1,g5212.t1,g5930.t1,g6064.t1,g6630.t1,g6799.t1,g685.t1,g7413.t1,g7581.t1	g10320.t1,g11147.t1,g11675.t1,g12792.t1,g13046.t1,g13698.t1,g14255.t1,g15308.t1,g15776.t1,g15777.t1,g15778.t1,g16191.t1,g17000.t1,g17017.t1,g2923.t1,g3399.t1,g3438.t1,g3508.t1,g5028.t1,g5212.t1,g5930.t1,g6064.t1,g6630.t1,g6799.t1,g685.t1,g7413.t1,g7581.t1	-1.70176532,-0.975709064,-0.941109181,-1.140978863,-1.012870911,-1.830988909,-0.775988852,-1.000636617,-1.472710602,-0.499906811,-0.570766721,-0.665574761,0.98270224,-1.171609195,-1.235571717,-1.075779746,-0.565693193,-1.645874695,1.348947025,-1.071311932,-2.062789819,-1.572103721,-0.635439473,-1.169926409,-1.490193703,-0.678026478,-0.579324972
GO Function	GO:0061629	RNA polymerase II-specific DNA-binding transcription factor binding	16	114	3.65784	bottom	0.0043	afc	STRG0A56FBJ.g11776.t1,STRG0A56FBJ.g11879.t1,STRG0A56FBJ.g12837.t1,STRG0A56FBJ.g13145.t1,STRG0A56FBJ.g13250.t1,STRG0A56FBJ.g13267.t1,STRG0A56FBJ.g13973.t1,STRG0A56FBJ.g14821.t1,STRG0A56FBJ.g15039.t1,STRG0A56FBJ.g15874.t1,STRG0A56FBJ.g15900.t1,STRG0A56FBJ.g16731.t1,STRG0A56FBJ.g3781.t1,STRG0A56FBJ.g7268.t1,STRG0A56FBJ.g8189.t1,STRG0A56FBJ.g9847.t1	g11776.t1,g11879.t1,g12837.t1,g13145.t1,g13250.t1,g13267.t1,g13973.t1,g14821.t1,g15039.t1,g15874.t1,g15900.t1,g16731.t1,g3781.t1,g7268.t1,g8189.t1,g9847.t1	g11776.t1,g11879.t1,g12837.t1,g13145.t1,g13250.t1,g13267.t1,g13973.t1,g14821.t1,g15039.t1,g15874.t1,g15900.t1,g16731.t1,g3781.t1,g7268.t1,g8189.t1,g9847.t1	1.470531856,0.886978057,1.198708879,1.109739973,1.420357293,0.866781681,0.89763724,1.359583046,1.39339247,0.956981837,0.785747421,1.729789056,0.87878332,1.517043867,0.687377784,1.839864242
GO Function	GO:0003714	Transcription corepressor activity	12	80	4.0917	bottom	0.0045	afc	STRG0A56FBJ.g11626.t1,STRG0A56FBJ.g11879.t1,STRG0A56FBJ.g13250.t1,STRG0A56FBJ.g14268.t1,STRG0A56FBJ.g15242.t1,STRG0A56FBJ.g16595.t1,STRG0A56FBJ.g16703.t1,STRG0A56FBJ.g2489.t1,STRG0A56FBJ.g5200.t1,STRG0A56FBJ.g5710.t1,STRG0A56FBJ.g7631.t1,STRG0A56FBJ.g9407.t1	g11626.t1,g11879.t1,g13250.t1,g14268.t1,g15242.t1,g16595.t1,g16703.t1,g2489.t1,g5200.t1,g5710.t1,g7631.t1,g9407.t1	g11626.t1,g11879.t1,g13250.t1,g14268.t1,g15242.t1,g16595.t1,g16703.t1,g2489.t1,g5200.t1,g5710.t1,g7631.t1,g9407.t1	1.323694824,0.886978057,1.420357293,1.171657699,1.836469269,0.729218637,1.854164198,1.593126435,0.700941323,0.750170095,1.693972121,2.180512122
GO Function	GO:0016874	Ligase activity	36	159	2.22283	bottom	0.0045	ks	STRG0A56FBJ.g11200.t1,STRG0A56FBJ.g11999.t1,STRG0A56FBJ.g12080.t1,STRG0A56FBJ.g12096.t1,STRG0A56FBJ.g1226.t1,STRG0A56FBJ.g12538.t1,STRG0A56FBJ.g12722.t1,STRG0A56FBJ.g12836.t1,STRG0A56FBJ.g13138.t1,STRG0A56FBJ.g13232.t1,STRG0A56FBJ.g13398.t1,STRG0A56FBJ.g13718.t1,STRG0A56FBJ.g15309.t1,STRG0A56FBJ.g15326.t1,STRG0A56FBJ.g15871.t1,STRG0A56FBJ.g1837.t1,STRG0A56FBJ.g2794.t1,STRG0A56FBJ.g2810.t1,STRG0A5…	g11200.t1,g11999.t1,g12080.t1,g12096.t1,g1226.t1,g12538.t1,g12722.t1,g12836.t1,g13138.t1,g13232.t1,g13398.t1,g13718.t1,g15309.t1,g15326.t1,g15871.t1,g1837.t1,g2794.t1,g2810.t1,g3347.t1,g3726.t1,g4169.t1,g4179.t1,g4314.t1,g4449.t1,g4814.t1,g5009.t1,g5131.t1,g5654.t1,g6159.t1,g6534.t1,g6830.t1,g6870.t1,g6883.t1,g7535.t1,g8083.t1,g8235.t1	g11200.t1,g11999.t1,g12080.t1,g12096.t1,g1226.t1,g12538.t1,g12722.t1,g12836.t1,g13138.t1,g13232.t1,g13398.t1,g13718.t1,g15309.t1,g15326.t1,g15871.t1,g1837.t1,g2794.t1,g2810.t1,g3347.t1,g3726.t1,g4169.t1,g4179.t1,g4314.t1,g4449.t1,g4814.t1,g5009.t1,g5131.t1,g5654.t1,g6159.t1,g6534.t1,g6830.t1,g6870.t1,g6883.t1,g7535.t1,g8083.t1,g8235.t1	0.787680476,0.877772701,-1.983173447,-1.143696305,0.906831892,0.572781634,0.677328044,2.872550878,1.674839412,-1.600701384,1.171325089,0.949910569,0.83213681,0.839474537,-1.389163794,1.119870399,0.93533056,1.51516926,2.050196105,0.706896934,0.670097367,1.009281909,1.278523882,0.586904635,1.021450341,0.639498977,-1.236043316,0.822087679,1.583158939,0.819937584,0.562406293,-0.845512281,0.864045015,…
GO Function	GO:0016879	Ligase activity, forming carbon-nitrogen bonds	6	42	5.44045	bottom	0.0045	afc	STRG0A56FBJ.g12836.t1,STRG0A56FBJ.g13398.t1,STRG0A56FBJ.g2794.t1,STRG0A56FBJ.g2810.t1,STRG0A56FBJ.g3347.t1,STRG0A56FBJ.g8235.t1	g12836.t1,g13398.t1,g2794.t1,g2810.t1,g3347.t1,g8235.t1	g12836.t1,g13398.t1,g2794.t1,g2810.t1,g3347.t1,g8235.t1	2.872550878,1.171325089,0.93533056,1.51516926,2.050196105,2.463807787
GO Function	GO:0008757	S-adenosylmethionine-dependent methyltransferase activity	14	135	3.87147	bottom	0.0046	afc	STRG0A56FBJ.g11369.t1,STRG0A56FBJ.g1170.t1,STRG0A56FBJ.g12513.t1,STRG0A56FBJ.g1254.t1,STRG0A56FBJ.g13272.t1,STRG0A56FBJ.g13403.t1,STRG0A56FBJ.g15872.t1,STRG0A56FBJ.g16812.t1,STRG0A56FBJ.g2692.t1,STRG0A56FBJ.g2843.t1,STRG0A56FBJ.g3125.t1,STRG0A56FBJ.g5791.t1,STRG0A56FBJ.g7631.t1,STRG0A56FBJ.g8391.t1	g11369.t1,g1170.t1,g12513.t1,g1254.t1,g13272.t1,g13403.t1,g15872.t1,g16812.t1,g2692.t1,g2843.t1,g3125.t1,g5791.t1,g7631.t1,g8391.t1	g11369.t1,g1170.t1,g12513.t1,g1254.t1,g13272.t1,g13403.t1,g15872.t1,g16812.t1,g2692.t1,g2843.t1,g3125.t1,g5791.t1,g7631.t1,g8391.t1	1.07180322,0.795073765,0.728606639,-1.117374731,1.420638048,2.214116895,0.853252566,1.084108836,1.439758596,2.508444172,2.154903887,2.035567487,1.693972121,0.827877741
[truncated: 601 more rows]
